# Supplementary material for: Three-dimensional non-parametric method for limbus detection
Source: PLoS One. 2018 Nov 26;13(11):e0207710. doi: 10.1371/journal.pone.0207710 (PMC6261009; doi:10.1371/journal.pone.0207710)
Supplement: S1 Table — (XLSX) [file pone.0207710.s001.xlsx]

## Sheet: OD_X
X coordinate of the limbus mm (Right eyes)
count	Name		Angle (degree)	0	1	2	3	4	5	6	7	8	9	10	11	12	13	14	15	16	17	18	19	20	21	22	23	24	25	26	27	28	29	30	31	32	33	34	35	36	37	38	39	40	41	42	43	44	45
				XL	XL	XL	XL	XL	XL	XL	XL	XL	XL	XL	XL	XL	XL	XL	XL	XL	XL	XL	XL	XL	XL	XL	XL	XL	XL	XL	XL	XL	XL	XL	XL	XL	XL	XL	XL	XL	XL	XL	XL	XL	XL	XL	XL	XL	XL
1	Anonymous participant OD 1			6.74205	6.7392	6.73146	6.72005	6.70621	6.69114	6.67406	6.65416	6.63266	6.61078	6.5897	6.56842	6.54513	6.51986	6.4926	6.46335	6.42961	6.39044	6.34824	6.30533	6.264	6.22326	6.18062	6.1361	6.0897	6.04146	5.99137	5.93946	5.88574	5.83022	5.77293	5.71084	5.64161	5.56627	5.48583	5.40127	5.31352	5.2235	5.13207	5.04006	4.94825	4.85739	4.76817	4.68121	4.59713	4.51644
2	Anonymous participant OD 2			6.98905	6.98799	6.9848	6.97948	6.97203	6.96246	6.95077	6.93696	6.92104	6.90301	6.88287	6.86065	6.83633	6.80993	6.78145	6.75091	6.71831	6.68367	6.64699	6.60828	6.56756	6.52484	6.48014	6.43346	6.38482	6.33423	6.28172	6.22729	6.17097	6.11276	6.0527	5.99079	5.92705	5.86151	5.79419	5.7251	5.65426	5.58171	5.50745	5.43152	5.35393	5.27471	5.19388	5.11147	5.0275	4.94201
3	Anonymous participant OD 3			6.74554	6.74451	6.74143	6.73629	6.72911	6.71987	6.70859	6.69526	6.67989	6.66249	6.64306	6.62421	6.60693	6.58878	6.56738	6.54037	6.50879	6.47523	6.43969	6.40219	6.36274	6.32136	6.27805	6.23282	6.1857	6.13669	6.08582	6.03309	5.97852	5.92213	5.86394	5.80396	5.74221	5.67871	5.61349	5.54655	5.47793	5.40763	5.33569	5.26213	5.18696	5.11021	5.0319	4.95206	4.87071	4.78788
4	Anonymous participant OD 4			6.98135	6.98029	6.9771	6.97178	6.96435	6.95479	6.94311	6.92931	6.91341	6.8954	6.87529	6.85309	6.82879	6.80242	6.77398	6.74347	6.71091	6.6763	6.63966	6.601	6.56033	6.51765	6.473	6.42637	6.37778	6.32725	6.2748	6.22043	6.16417	6.10603	6.04603	5.98419	5.92052	5.85505	5.7878	5.71879	5.64803	5.57556	5.50138	5.42553	5.34803	5.26889	5.18816	5.10584	5.02196	4.93656
5	Anonymous participant OD 5			6.99343	6.99236	6.98917	6.98384	6.97639	6.96681	6.95511	6.9413	6.92537	6.90732	6.88718	6.86494	6.8406	6.81418	6.78569	6.75513	6.72251	6.68785	6.65114	6.61241	6.57167	6.52893	6.48419	6.43748	6.38881	6.3382	6.28565	6.23119	6.17483	6.11659	6.05648	5.99454	5.93076	5.86518	5.79781	5.72868	5.6578	5.5852	5.51089	5.43491	5.35727	5.27801	5.19713	5.11467	5.03065	4.9451
6	Anonymous participant OD 6			6.98102	6.97996	6.97677	6.97145	6.96402	6.95446	6.94278	6.92899	6.91308	6.89507	6.87496	6.84994	6.81897	6.78468	6.74967	6.7165	6.68406	6.6496	6.6131	6.57459	6.53408	6.49158	6.44711	6.40066	6.35227	6.30195	6.2497	6.19555	6.13951	6.0816	6.02184	5.96025	5.89684	5.83164	5.76465	5.69591	5.62544	5.55325	5.47938	5.40383	5.32663	5.24782	5.1674	5.08541	5.00188	4.91682
7	Anonymous participant OD 7			6.88802	6.88697	6.88382	6.87858	6.87124	6.86181	6.85028	6.83667	6.82098	6.80321	6.78337	6.76146	6.7375	6.71148	6.68341	6.65331	6.62119	6.58704	6.55089	6.51275	6.47262	6.43052	6.38646	6.34045	6.29252	6.24266	6.19091	6.13727	6.08176	6.0244	5.9652	5.90425	5.84164	5.77736	5.71144	5.64389	5.5747	5.50391	5.43152	5.35754	5.28199	5.20489	5.12624	5.04607	4.96438	4.88121
8	Anonymous participant OD 8			6.90819	6.90714	6.90398	6.89872	6.89136	6.8819	6.87035	6.8567	6.84096	6.82314	6.80324	6.78127	6.75723	6.73113	6.70299	6.6728	6.64058	6.60633	6.57008	6.53182	6.49157	6.44935	6.40516	6.35902	6.31094	6.26095	6.20904	6.15524	6.09957	6.04204	5.98267	5.92147	5.85848	5.79369	5.72715	5.65886	5.58884	5.51713	5.44373	5.36867	5.29198	5.21368	5.13378	5.05233	4.96934	4.88483
9	Anonymous participant OD 9			6.69619	6.69517	6.69211	6.68701	6.67988	6.67071	6.65951	6.64628	6.63102	6.61375	6.59446	6.57316	6.54986	6.52457	6.49728	6.46802	6.43679	6.4036	6.36845	6.33137	6.29236	6.25143	6.2086	6.16387	6.11727	6.06881	6.0185	5.96635	5.91238	5.85662	5.79907	5.73975	5.67869	5.6159	5.55139	5.4852	5.41937	5.35463	5.28906	5.22081	5.14816	5.07199	4.99427	4.91503	4.83429	4.75208
10	Anonymous participant OD 10			6.99279	6.99172	6.98853	6.98321	6.97575	6.96618	6.95448	6.94067	6.92474	6.9067	6.88655	6.86431	6.83998	6.81356	6.78507	6.75452	6.7219	6.68724	6.65054	6.61181	6.57107	6.52833	6.4836	6.4369	6.38823	6.33762	6.28508	6.23062	6.17427	6.11603	6.05593	5.99399	5.93022	5.86465	5.79728	5.72816	5.65729	5.58469	5.51039	5.43442	5.35679	5.27752	5.19665	5.1142	5.03019	4.94465
11	Anonymous participant OD 11			6.41712	6.41796	6.41967	6.42104	6.42084	6.41787	6.41185	6.40359	6.3935	6.38197	6.36939	6.35631	6.34276	6.32843	6.31298	6.29608	6.27929	6.26299	6.24508	6.22352	6.19631	6.16459	6.13083	6.09502	6.05716	6.01728	5.97536	5.93143	5.88549	5.83754	5.78761	5.7357	5.68182	5.62598	5.5682	5.5085	5.44689	5.38338	5.31799	5.25075	5.18166	5.11074	5.03803	4.96353	4.88728	4.80928
12	Anonymous participant OD 12			6.99433	6.99327	6.99007	6.98474	6.97729	6.96771	6.95601	6.9422	6.92626	6.90822	6.88807	6.86582	6.84149	6.81507	6.78657	6.756	6.72338	6.68871	6.652	6.61327	6.57252	6.52977	6.48503	6.43832	6.38964	6.33902	6.28646	6.23199	6.17563	6.11738	6.05727	5.99531	5.93153	5.86594	5.79856	5.72942	5.65853	5.58592	5.51161	5.43562	5.35797	5.27869	5.1978	5.11533	5.0313	4.94574
13	Anonymous participant OD 13			6.97721	6.97614	6.97295	6.96764	6.96021	6.95065	6.93898	6.9252	6.9093	6.8913	6.87121	6.84901	6.82474	6.79838	6.76995	6.73946	6.70692	6.67233	6.63572	6.59708	6.55643	6.51378	6.46915	6.42255	6.37399	6.3235	6.27107	6.21674	6.16051	6.1024	6.04244	5.98063	5.91701	5.85158	5.78437	5.71539	5.64468	5.57224	5.49811	5.42231	5.34485	5.26576	5.18507	5.1028	5.01898	4.93363
14	Anonymous participant OD 14			6.68158	6.68056	6.67751	6.67242	6.6653	6.65615	6.64497	6.63177	6.61655	6.59931	6.58007	6.55882	6.53557	6.51033	6.4831	6.45391	6.42274	6.38962	6.35456	6.31755	6.27863	6.23506	6.18589	6.13368	6.08094	6.03012	5.98013	5.92831	5.87469	5.81928	5.7621	5.70316	5.64249	5.5801	5.516	5.45023	5.3828	5.31372	5.24303	5.17074	5.09688	5.02146	4.94452	4.86606	4.78613	4.70474
15	Anonymous participant OD 15			5.89515	5.89692	5.90057	5.90366	5.9037	5.89825	5.88835	5.87665	5.86316	5.84789	5.83083	5.81462	5.80022	5.78521	5.76719	5.74379	5.71606	5.68658	5.65537	5.62244	5.5878	5.55318	5.5195	5.48559	5.4503	5.41251	5.37298	5.33246	5.28984	5.24407	5.19414	5.14101	5.08632	5.03007	4.9723	4.91301	4.85222	4.78995	4.72623	4.66107	4.59448	4.52851	4.46384	4.39857	4.33088	4.25912
16	Anonymous participant OD 16			6.8998	6.89875	6.8956	6.89034	6.88299	6.87354	6.862	6.84837	6.83265	6.81485	6.79498	6.77303	6.74902	6.72296	6.69484	6.66469	6.63251	6.59831	6.5621	6.52389	6.48369	6.44152	6.39738	6.3513	6.30328	6.25334	6.2015	6.14777	6.09216	6.0347	5.9754	5.91428	5.85136	5.78666	5.72019	5.65198	5.58205	5.51042	5.43712	5.36215	5.28555	5.20734	5.12755	5.04619	4.9633	4.87889
17	Anonymous participant OD 17			6.79054	6.7895	6.7864	6.78123	6.77399	6.7647	6.75334	6.73992	6.72445	6.70693	6.68737	6.66577	6.64215	6.61649	6.58883	6.55915	6.52748	6.49382	6.45818	6.42058	6.38102	6.33951	6.29608	6.25072	6.20346	6.15432	6.10329	6.05041	5.99569	5.93914	5.88078	5.82063	5.7587	5.69502	5.62961	5.56248	5.49366	5.42316	5.35102	5.27724	5.20185	5.12488	5.04635	4.96628	4.8847	4.80163
18	Anonymous participant OD 18			6.9854	6.98434	6.98115	6.97583	6.96839	6.95882	6.94713	6.93333	6.91742	6.8994	6.87928	6.85706	6.83275	6.80637	6.77791	6.74738	6.7148	6.68017	6.64351	6.60483	6.56413	6.52143	6.47675	6.4301	6.38148	6.33092	6.27844	6.22404	6.16774	6.10957	6.04954	5.98766	5.92396	5.85845	5.79116	5.72211	5.65131	5.57879	5.50457	5.42868	5.35113	5.27195	5.19116	5.1088	5.02488	4.93942
19	Anonymous participant OD 19			6.50222	6.50123	6.49826	6.49331	6.48639	6.47748	6.46933	6.46296	6.45584	6.44547	6.42937	6.4086	6.38589	6.36122	6.33462	6.30609	6.27564	6.24328	6.20902	6.17286	6.13483	6.09493	6.05317	6.00956	5.96413	5.91688	5.86782	5.81698	5.76437	5.71	5.65389	5.59606	5.53652	5.4753	5.41241	5.34787	5.28171	5.21393	5.14457	5.07364	5.00116	4.92716	4.85166	4.77468	4.69625	4.61638
20	Anonymous participant OD 20			6.98832	6.98726	6.98406	6.97874	6.9713	6.96173	6.95004	6.93623	6.92031	6.90228	6.88215	6.85993	6.83561	6.80921	6.78074	6.7502	6.71761	6.68297	6.64629	6.60759	6.56687	6.52416	6.47946	6.43278	6.38415	6.33357	6.28106	6.22664	6.17032	6.11212	6.05206	5.99016	5.92643	5.8609	5.79358	5.7245	5.65367	5.58112	5.50687	5.43095	5.35336	5.27415	5.19334	5.11093	5.02698	4.94149
21	Anonymous participant OD 21			6.93888	6.93704	6.93309	6.92702	6.91885	6.90858	6.89621	6.88176	6.86522	6.84662	6.82595	6.80323	6.77847	6.75168	6.72287	6.69205	6.65923	6.62443	6.58766	6.54894	6.50827	6.46567	6.42116	6.37476	6.32647	6.27631	6.22428	6.17035	6.11454	6.05687	5.99735	5.93601	5.87286	5.80792	5.74121	5.67275	5.60256	5.53067	5.45709	5.38185	5.30497	5.22647	5.14639	5.06473	4.98153	4.89682
22	Anonymous participant OD 22			6.96664	6.96558	6.9624	6.95709	6.94967	6.94013	6.92848	6.91471	6.89884	6.88087	6.8608	6.8361	6.80584	6.77238	6.73807	6.70523	6.67285	6.63844	6.60201	6.56356	6.52312	6.48069	6.43629	6.38992	6.34161	6.29137	6.23921	6.18515	6.12921	6.0714	6.01174	5.95025	5.88695	5.82185	5.75498	5.68636	5.616	5.54394	5.47018	5.39476	5.3177	5.23901	5.15873	5.07688	4.99348	4.90857
23	Anonymous participant OD 23			6.80343	6.80239	6.79928	6.7941	6.78686	6.77754	6.76884	6.76179	6.75388	6.74265	6.72564	6.70392	6.68016	6.65436	6.62653	6.59669	6.56484	6.53098	6.49514	6.45732	6.41753	6.37579	6.33211	6.28649	6.23896	6.18953	6.13822	6.08504	6.03	5.97312	5.91443	5.85393	5.79166	5.72761	5.66183	5.59431	5.52728	5.4615	5.3949	5.32552	5.25151	5.17381	5.09453	5.01369	4.93134	4.84747
24	Anonymous participant OD 24			6.97808	6.97702	6.97383	6.96852	6.96108	6.95153	6.93985	6.92607	6.91017	6.89217	6.87207	6.84987	6.82559	6.79923	6.7708	6.74031	6.70776	6.67317	6.63655	6.5979	6.55725	6.5146	6.46996	6.42336	6.37479	6.32429	6.27186	6.21751	6.16128	6.10317	6.04319	5.98138	5.91775	5.85231	5.78509	5.71611	5.64538	5.57294	5.4988	5.42299	5.34552	5.26642	5.18572	5.10344	5.01961	4.93425
25	Anonymous participant OD 25			6.35881	6.35784	6.35493	6.35009	6.34332	6.33461	6.32397	6.31141	6.29692	6.28052	6.2622	6.24198	6.21985	6.19583	6.16992	6.14214	6.10976	6.07181	6.03084	5.98935	5.94979	5.91109	5.87059	5.8283	5.78423	5.73841	5.69083	5.64153	5.5905	5.53777	5.48336	5.42727	5.36953	5.31015	5.24916	5.18657	5.1224	5.05667	4.98939	4.9206	4.85031	4.77854	4.70532	4.63066	4.5546	4.47714
26	Anonymous participant OD 26			6.98837	6.9873	6.98411	6.97879	6.97134	6.96178	6.95009	6.93628	6.92036	6.90233	6.8822	6.85997	6.83566	6.80926	6.78078	6.75025	6.71765	6.68301	6.64633	6.60763	6.56692	6.5242	6.4795	6.43283	6.38419	6.33361	6.2811	6.22668	6.17036	6.11216	6.0521	5.9902	5.92647	5.86094	5.79362	5.72454	5.65371	5.58116	5.50691	5.43098	5.3534	5.27419	5.19337	5.11097	5.02701	4.94152
27	Anonymous participant OD 27			6.98363	6.98257	6.97938	6.97406	6.96662	6.95706	6.94538	6.93158	6.91567	6.89765	6.87754	6.85533	6.83103	6.80464	6.77619	6.74567	6.7131	6.67848	6.64183	6.60316	6.56247	6.51978	6.47511	6.42847	6.37987	6.32932	6.27685	6.22246	6.16618	6.10802	6.048	5.98614	5.92246	5.85697	5.7897	5.72066	5.64988	5.57738	5.50318	5.4273	5.34977	5.27062	5.18985	5.10751	5.02361	4.93818
28	Anonymous participant OD 28			6.4422	6.44122	6.43828	6.43337	6.42651	6.41769	6.40691	6.39418	6.37951	6.36289	6.34433	6.32384	6.30142	6.27709	6.25084	6.22269	6.19264	6.16071	6.1269	6.09122	6.05369	6.01431	5.97311	5.93008	5.88524	5.83862	5.79021	5.74004	5.68813	5.63448	5.57911	5.51955	5.45494	5.38766	5.32002	5.2542	5.18919	5.1226	5.05445	4.98476	4.91356	4.84085	4.76667	4.69104	4.61398	4.53552
29	Anonymous participant OD 29			6.98223	6.98116	6.97797	6.97266	6.96522	6.95566	6.94398	6.93018	6.91428	6.89627	6.87615	6.85394	6.82965	6.80327	6.77483	6.74431	6.71175	6.67714	6.64049	6.60183	6.56115	6.51847	6.47381	6.42717	6.37858	6.32805	6.27558	6.22121	6.16494	6.10679	6.04679	5.98494	5.92127	5.85579	5.78853	5.71951	5.64874	5.57626	5.50207	5.42621	5.3487	5.26955	5.18881	5.10648	5.02259	4.93718
30	Anonymous participant OD 30			6.98035	6.97929	6.9761	6.97078	6.96335	6.95379	6.94211	6.92832	6.91242	6.89441	6.8743	6.8521	6.82781	6.80144	6.773	6.7425	6.70994	6.67534	6.63871	6.60005	6.55938	6.51672	6.47207	6.42544	6.37687	6.32634	6.2739	6.21954	6.16328	6.10515	6.04516	5.98333	5.91967	5.85421	5.78697	5.71797	5.64722	5.57475	5.50059	5.42475	5.34726	5.26814	5.18741	5.1051	5.02124	4.93585
31	Anonymous participant OD 31			6.98587	6.9848	6.98161	6.97629	6.96885	6.95928	6.9476	6.9338	6.91788	6.89986	6.87974	6.85752	6.83321	6.80682	6.77836	6.74783	6.71525	6.68062	6.64396	6.60527	6.56457	6.52187	6.47718	6.43053	6.38191	6.33135	6.27886	6.22445	6.16816	6.10998	6.04994	5.98806	5.92435	5.85884	5.79155	5.72249	5.65169	5.57916	5.50494	5.42904	5.35149	5.2723	5.19151	5.10914	5.02521	4.93975
32	Anonymous participant OD 32			6.35881	6.35784	6.35493	6.35009	6.34332	6.33461	6.32397	6.31141	6.29692	6.28052	6.2622	6.24198	6.21985	6.19583	6.16992	6.14214	6.10976	6.07181	6.03084	5.98935	5.94979	5.91109	5.87059	5.8283	5.78423	5.73841	5.69083	5.64153	5.5905	5.53777	5.48336	5.42727	5.36953	5.31015	5.24916	5.18657	5.1224	5.05667	4.98939	4.9206	4.85031	4.77854	4.70532	4.63066	4.5546	4.47714
33	Anonymous participant OD 33			6.99478	6.99372	6.99052	6.9852	6.97774	6.96817	6.95647	6.94265	6.92671	6.90867	6.88852	6.86627	6.84193	6.81551	6.78701	6.75644	6.72382	6.68914	6.65243	6.6137	6.57295	6.53019	6.48545	6.43873	6.39005	6.33943	6.28687	6.2324	6.17603	6.11778	6.05766	5.9957	5.93191	5.86632	5.79894	5.72979	5.6589	5.58628	5.51196	5.43597	5.35832	5.27903	5.19814	5.11566	5.03163	4.94606
34	Anonymous participant OD 34			6.29766	6.2967	6.29383	6.28903	6.28232	6.2737	6.26316	6.25072	6.23637	6.22013	6.20199	6.18196	6.16004	6.13625	6.11059	6.08307	6.0537	6.02248	5.98943	5.95456	5.91787	5.87937	5.83909	5.79703	5.7532	5.70762	5.6603	5.61126	5.56051	5.50806	5.45393	5.40039	5.34821	5.2953	5.23964	5.1793	5.11521	5.04957	4.9824	4.9137	4.84351	4.77184	4.69872	4.62417	4.54821	4.47086
35	Anonymous participant OD 35			6.961	6.95994	6.95676	6.95146	6.94405	6.93452	6.92287	6.90912	6.89326	6.8753	6.85525	6.83311	6.80889	6.78259	6.75423	6.72381	6.69135	6.65684	6.62031	6.58176	6.5412	6.49613	6.44562	6.39209	6.33785	6.28518	6.23308	6.17907	6.12318	6.06543	6.00583	5.9444	5.88116	5.81612	5.74932	5.68076	5.61049	5.53852	5.46489	5.3896	5.31269	5.23418	5.15408	5.07242	4.98923	4.90453
36	Anonymous participant OD 36			6.961	6.95994	6.95676	6.95146	6.94405	6.93452	6.92287	6.90912	6.89326	6.8753	6.85525	6.83311	6.80889	6.78259	6.75423	6.72381	6.69135	6.65684	6.62031	6.58176	6.5412	6.49613	6.44562	6.39209	6.33785	6.28518	6.23308	6.17907	6.12318	6.06543	6.00583	5.9444	5.88116	5.81612	5.74932	5.68076	5.61049	5.53852	5.46489	5.3896	5.31269	5.23418	5.15408	5.07242	4.98923	4.90453
37	Anonymous participant OD 37			6.98005	6.97899	6.9758	6.97049	6.96305	6.95349	6.94181	6.92802	6.91212	6.89412	6.87401	6.85181	6.82752	6.80115	6.77272	6.74221	6.70966	6.67506	6.63842	6.59977	6.5591	6.51644	6.47179	6.42517	6.3766	6.32608	6.27363	6.21927	6.16302	6.10489	6.0449	5.98307	5.91942	5.85396	5.78673	5.71772	5.64698	5.57452	5.50036	5.42452	5.34703	5.26791	5.18719	5.10489	5.02103	4.93564
38	Anonymous participant OD 38			5.923	5.9221	5.91939	5.91488	5.90857	5.90046	5.89055	5.87885	5.86536	5.85008	5.83301	5.81671	5.8021	5.78684	5.76861	5.74511	5.71737	5.68789	5.65668	5.62374	5.58909	5.55273	5.51469	5.47496	5.43357	5.39052	5.34583	5.29951	5.25158	5.20205	5.15093	5.10045	5.0514	5.0017	4.94934	4.89244	4.8319	4.7699	4.70644	4.64155	4.57525	4.50755	4.43848	4.36806	4.2963	4.22324
39	Anonymous participant OD 39			6.99095	6.98989	6.98669	6.98137	6.97392	6.96435	6.95265	6.93884	6.92291	6.90488	6.88474	6.86251	6.83818	6.81177	6.78329	6.75274	6.72013	6.68548	6.64879	6.61007	6.56934	6.52661	6.4819	6.4352	6.38655	6.33595	6.28342	6.22898	6.17264	6.11442	6.05434	5.99241	5.92866	5.8631	5.79576	5.72665	5.6558	5.58322	5.50894	5.43299	5.35538	5.27614	5.19529	5.11286	5.02887	4.94335
40	Anonymous participant OD 40			6.25422	6.25327	6.25041	6.24565	6.23898	6.23042	6.21996	6.2076	6.19335	6.17722	6.1592	6.13931	6.11755	6.09392	6.06844	6.04111	6.01194	5.98094	5.94811	5.91348	5.87704	5.83882	5.79881	5.75704	5.71351	5.66825	5.62125	5.57255	5.52215	5.47006	5.41631	5.36091	5.30388	5.24523	5.18498	5.12316	5.05977	4.99484	4.92839	4.86044	4.79101	4.72012	4.64779	4.57405	4.49891	4.4224
41	Anonymous participant OD 41			6.52122	6.52023	6.51725	6.51228	6.50533	6.4964	6.48291	6.46388	6.44172	6.41882	6.39754	6.37688	6.35428	6.32974	6.30327	6.27488	6.24458	6.21238	6.17829	6.14231	6.10446	6.06233	6.01505	5.96491	5.91415	5.86494	5.81632	5.76592	5.71377	5.65988	5.60427	5.54694	5.48793	5.42725	5.36491	5.30094	5.23535	5.16817	5.09941	5.0291	4.95726	4.88195	4.80254	4.72093	4.63892	4.5582
42	Anonymous participant OD 42			6.97691	6.97585	6.97266	6.96735	6.95992	6.95036	6.93869	6.92491	6.90901	6.89102	6.87092	6.84873	6.82445	6.79809	6.76967	6.73918	6.70664	6.67205	6.63544	6.5968	6.55615	6.51351	6.46888	6.42228	6.37373	6.32323	6.27081	6.21647	6.16025	6.10215	6.04218	5.98038	5.91676	5.85133	5.78412	5.71515	5.64444	5.57201	5.49788	5.42208	5.34463	5.26554	5.18486	5.10259	5.01877	4.93342
43	Anonymous participant OD 43			6.98446	6.98339	6.9802	6.97489	6.96744	6.95788	6.9462	6.9324	6.91648	6.89847	6.87835	6.85613	6.83183	6.80545	6.77699	6.74647	6.71389	6.67927	6.64261	6.60393	6.56324	6.52055	6.47588	6.42923	6.38062	6.33007	6.27759	6.2232	6.16691	6.10874	6.04872	5.98685	5.92316	5.85766	5.79038	5.72133	5.65054	5.57804	5.50383	5.42794	5.3504	5.27124	5.19046	5.10811	5.0242	4.93876
44	Anonymous participant OD 44			6.98771	6.98664	6.98345	6.97813	6.97069	6.96112	6.94943	6.93562	6.91971	6.90168	6.88155	6.85933	6.83501	6.80861	6.78014	6.74961	6.71702	6.68238	6.64571	6.60701	6.5663	6.52359	6.47889	6.43222	6.38359	6.33302	6.28051	6.22609	6.16978	6.11159	6.05153	5.98964	5.92591	5.86039	5.79307	5.724	5.65318	5.58063	5.50639	5.43047	5.3529	5.27369	5.19288	5.11049	5.02654	4.94106
45	Anonymous participant OD 45			6.98771	6.98664	6.98345	6.97813	6.97069	6.96112	6.94943	6.93562	6.91971	6.90168	6.88155	6.85933	6.83501	6.80861	6.78014	6.74961	6.71702	6.68238	6.64571	6.60701	6.5663	6.52359	6.47889	6.43222	6.38359	6.33302	6.28051	6.22609	6.16978	6.11159	6.05153	5.98964	5.92591	5.86039	5.79307	5.724	5.65318	5.58063	5.50639	5.43047	5.3529	5.27369	5.19288	5.11049	5.02654	4.94106
46	Anonymous participant OD 46			6.98882	6.98776	6.98457	6.97924	6.9718	6.96223	6.95054	6.93673	6.92081	6.90278	6.88265	6.86042	6.8361	6.8097	6.78122	6.75068	6.71809	6.68344	6.64677	6.60806	6.56735	6.52463	6.47992	6.43325	6.38461	6.33402	6.28151	6.22709	6.17076	6.11256	6.0525	5.99059	5.92686	5.86132	5.794	5.72491	5.65408	5.58152	5.50727	5.43134	5.35375	5.27453	5.19371	5.1113	5.02734	4.94184
47	Anonymous participant OD 47			6.75584	6.75481	6.75173	6.74658	6.73938	6.73013	6.72145	6.71432	6.70633	6.69506	6.67812	6.65656	6.63296	6.60734	6.57972	6.55008	6.51845	6.48484	6.44925	6.4117	6.37219	6.33074	6.28737	6.24208	6.19488	6.1458	6.09722	6.04998	6.00187	5.95075	5.89456	5.83426	5.77219	5.70837	5.6428	5.57552	5.50653	5.43587	5.36355	5.2896	5.21404	5.13689	5.05818	4.97792	4.89615	4.81288
48	Anonymous participant OD 48			6.97946	6.9784	6.97521	6.9699	6.96246	6.9529	6.94123	6.92744	6.91154	6.89353	6.87343	6.85123	6.82695	6.80058	6.77214	6.74164	6.70909	6.67449	6.63786	6.59921	6.55855	6.51589	6.47125	6.42463	6.37606	6.32554	6.2731	6.21875	6.1625	6.10438	6.04439	5.98257	5.91892	5.85347	5.78624	5.71724	5.6465	5.57405	5.49989	5.42406	5.34658	5.26747	5.18675	5.10446	5.02061	4.93523
49	Anonymous participant OD 49			6.97351	6.97245	6.96926	6.96395	6.95652	6.94697	6.93531	6.92153	6.90564	6.88765	6.86757	6.84539	6.82112	6.79478	6.76637	6.73589	6.70337	6.6688	6.6322	6.59358	6.55296	6.51033	6.46573	6.41915	6.37062	6.32015	6.26775	6.21344	6.15724	6.09917	6.03924	5.97746	5.91387	5.84848	5.7813	5.71236	5.64169	5.56929	5.4952	5.41943	5.34202	5.26297	5.18233	5.1001	5.01632	4.93102
50	Anonymous participant OD 50			6.80864	6.80761	6.8045	6.79931	6.79206	6.78273	6.77135	6.75789	6.74238	6.72482	6.70521	6.68355	6.65986	6.63414	6.6064	6.57664	6.54489	6.51114	6.4754	6.4377	6.39803	6.35903	6.32165	6.28344	6.24203	6.19512	6.14376	6.09052	6.03544	5.97851	5.91976	5.85921	5.79688	5.73278	5.66693	5.59936	5.53008	5.45912	5.38649	5.31222	5.23634	5.16097	5.08685	5.01196	4.93443	4.8525
51	Anonymous participant OD 51			6.90912	6.90807	6.90491	6.89965	6.89229	6.88283	6.87127	6.85762	6.84188	6.82406	6.80415	6.78482	6.76705	6.74838	6.72639	6.69869	6.66635	6.63197	6.59557	6.55717	6.51676	6.47438	6.43002	6.3837	6.33543	6.28524	6.23313	6.17913	6.12324	6.06548	6.00588	5.94445	5.88121	5.81618	5.74937	5.68082	5.61053	5.53853	5.46485	5.3895	5.31252	5.23391	5.15371	5.07193	4.98862	4.90378
52	Anonymous participant OD 52			6.25422	6.25327	6.25041	6.24565	6.23898	6.23042	6.21996	6.2076	6.19335	6.17722	6.1592	6.13931	6.11755	6.09392	6.06844	6.04111	6.01194	5.98094	5.94811	5.91348	5.87704	5.83882	5.79881	5.75704	5.71351	5.66825	5.62125	5.57255	5.52215	5.47006	5.41631	5.36091	5.30388	5.24523	5.18498	5.12316	5.05977	4.99484	4.92839	4.86044	4.79101	4.72012	4.64779	4.57405	4.49891	4.4224
53	Anonymous participant OD 53			6.99707	6.996	6.99281	6.98748	6.98003	6.97044	6.95874	6.94492	6.92898	6.91092	6.89077	6.86851	6.84417	6.81774	6.78923	6.75865	6.72602	6.69133	6.65461	6.61586	6.5751	6.53233	6.48757	6.44084	6.39214	6.3415	6.28893	6.23444	6.17805	6.11978	6.05964	5.99766	5.93385	5.86824	5.80083	5.73166	5.66075	5.58811	5.51377	5.43775	5.36007	5.28076	5.19984	5.11733	5.03327	4.94768
54	Anonymous participant OD 54			6.98453	6.98346	6.98027	6.97496	6.96751	6.95795	6.94627	6.93247	6.91655	6.89854	6.87842	6.8562	6.8319	6.80551	6.77706	6.74654	6.71396	6.67934	6.64268	6.604	6.56331	6.52062	6.47594	6.42929	6.38068	6.33013	6.27765	6.22326	6.16697	6.10881	6.04878	5.98691	5.92322	5.85772	5.79044	5.72139	5.6506	5.57809	5.50388	5.428	5.35046	5.27129	5.19052	5.10816	5.02425	4.93881
55	Anonymous participant OD 55			6.98464	6.98357	6.98038	6.97507	6.96762	6.95806	6.94638	6.93258	6.91666	6.89865	6.87853	6.85631	6.83201	6.80562	6.77716	6.74664	6.71407	6.67944	6.64279	6.60411	6.56341	6.52072	6.47604	6.42939	6.38078	6.33023	6.27775	6.22336	6.16707	6.1089	6.04887	5.987	5.92331	5.85781	5.79053	5.72148	5.65069	5.57818	5.50397	5.42808	5.35054	5.27137	5.1906	5.10824	5.02433	4.93888
56	Anonymous participant OD 56			6.34772	6.34676	6.34386	6.33903	6.33226	6.32357	6.31295	6.30041	6.28595	6.26957	6.25129	6.2311	6.20901	6.18503	6.15917	6.13143	6.10182	6.07036	6.03704	6.00189	5.96491	5.92611	5.88551	5.84311	5.79893	5.75299	5.7053	5.65586	5.60471	5.55185	5.49729	5.44106	5.38318	5.32365	5.2625	5.19975	5.13542	5.06952	5.00208	4.93311	4.86264	4.79069	4.71728	4.64243	4.56617	4.48852
57	Anonymous participant OD 57			6.98403	6.98297	6.97978	6.97446	6.96702	6.95745	6.94577	6.93197	6.91606	6.89805	6.87793	6.85571	6.83141	6.80503	6.77657	6.74606	6.71348	6.67886	6.64221	6.60353	6.56284	6.52015	6.47548	6.42883	6.38023	6.32968	6.2772	6.22282	6.16653	6.10837	6.04835	5.98648	5.92279	5.8573	5.79002	5.72098	5.6502	5.57769	5.50349	5.42761	5.35008	5.27091	5.19015	5.1078	5.02389	4.93846
58	Anonymous participant OD 58			6.82536	6.82172	6.81241	6.79983	6.78639	6.77448	6.76311	6.74967	6.73418	6.71664	6.69705	6.67542	6.65176	6.62607	6.59836	6.56865	6.53693	6.50322	6.46753	6.42987	6.39025	6.34868	6.30519	6.25977	6.21244	6.16322	6.11212	6.05917	6.00436	5.94773	5.88929	5.82682	5.75957	5.68968	5.61918	5.55005	5.48138	5.41104	5.33906	5.26544	5.19023	5.11343	5.03507	4.95518	4.87379	4.7909
59	Anonymous participant OD 59			6.34772	6.34676	6.34386	6.33903	6.33226	6.32357	6.31295	6.30041	6.28595	6.26957	6.25129	6.2311	6.20901	6.18503	6.15917	6.13143	6.10182	6.07036	6.03704	6.00189	5.96491	5.92611	5.88551	5.84311	5.79893	5.75299	5.7053	5.65586	5.60471	5.55185	5.49729	5.44106	5.38318	5.32365	5.2625	5.19975	5.13542	5.06952	5.00208	4.93311	4.86264	4.79069	4.71728	4.64243	4.56617	4.48852
60	Anonymous participant OD 60			6.9869	6.98584	6.98265	6.97733	6.96988	6.96031	6.94863	6.93482	6.91891	6.90088	6.88076	6.85853	6.83422	6.80783	6.77936	6.74883	6.71624	6.68161	6.64494	6.60625	6.56554	6.52283	6.47814	6.43148	6.38285	6.33228	6.27979	6.22538	6.16907	6.11088	6.05083	5.98894	5.92523	5.85971	5.7924	5.72333	5.65252	5.57999	5.50575	5.42984	5.35228	5.27308	5.19228	5.1099	5.02596	4.94049
61	Anonymous participant OD 61			6.65078	6.64976	6.64672	6.64166	6.63458	6.62547	6.61434	6.6012	6.58605	6.56889	6.54974	6.52858	6.50544	6.48032	6.45322	6.42416	6.39314	6.36017	6.32526	6.28843	6.24969	6.20903	6.16649	6.12207	6.07579	6.02765	5.97768	5.92589	5.87229	5.8169	5.75974	5.70083	5.64018	5.57781	5.51374	5.448	5.38059	5.31155	5.24088	5.16862	5.09479	5.0194	4.94249	4.86407	4.78417	4.70281
62	Anonymous participant OD 62			6.99672	6.99566	6.99246	6.98713	6.97968	6.9701	6.95839	6.94457	6.92863	6.91058	6.89043	6.86817	6.84383	6.8174	6.78889	6.75832	6.72568	6.691	6.65428	6.61553	6.57477	6.532	6.48725	6.44052	6.39182	6.34118	6.28861	6.23413	6.17774	6.11947	6.05934	5.99736	5.93356	5.86795	5.80055	5.73138	5.66047	5.58783	5.51349	5.43747	5.3598	5.28049	5.19958	5.11708	5.03302	4.94743
63	Anonymous participant OD 63			6.80387	6.80023	6.79092	6.77835	6.76493	6.75306	6.74172	6.72832	6.71288	6.69539	6.67587	6.65431	6.63072	6.60511	6.57749	6.54787	6.51625	6.48265	6.44707	6.40953	6.37004	6.3286	6.28524	6.23997	6.19279	6.14373	6.09045	6.03216	5.97106	5.90931	5.849	5.78917	5.72758	5.66425	5.59919	5.53242	5.46397	5.39385	5.3221	5.24872	5.17374	5.09719	5.01908	4.93944	4.8583	4.77568
64	Anonymous participant OD 64			6.97524	6.97417	6.97099	6.96568	6.95824	6.94869	6.93702	6.92324	6.90735	6.88936	6.86927	6.84708	6.82281	6.79646	6.76804	6.73756	6.70503	6.67045	6.63384	6.59521	6.55458	6.51194	6.46733	6.42074	6.37219	6.32171	6.2693	6.21498	6.15877	6.10068	6.04073	5.97894	5.91533	5.84992	5.78273	5.71378	5.64308	5.57067	5.49656	5.42078	5.34334	5.26428	5.18361	5.10136	5.01756	4.93224
65	Anonymous participant OD 65			6.88802	6.88697	6.88382	6.87858	6.87124	6.86181	6.85028	6.83667	6.82098	6.80321	6.78337	6.76146	6.7375	6.71148	6.68341	6.65331	6.62119	6.58704	6.55089	6.51275	6.47262	6.43052	6.38646	6.34045	6.29252	6.24266	6.19091	6.13727	6.08176	6.0244	5.9652	5.90425	5.84164	5.77736	5.71144	5.64389	5.5747	5.50391	5.43152	5.35754	5.28199	5.20489	5.12624	5.04607	4.96438	4.88121
66	Anonymous participant OD 66			6.97568	6.97462	6.97143	6.96612	6.95869	6.94914	6.93747	6.92369	6.9078	6.8898	6.86971	6.84752	6.82325	6.7969	6.76848	6.73799	6.70546	6.67088	6.63427	6.59564	6.555	6.51236	6.46774	6.42115	6.3726	6.32212	6.2697	6.21538	6.15916	6.10107	6.04112	5.97933	5.91572	5.8503	5.7831	5.71415	5.64345	5.57103	5.49691	5.42112	5.34368	5.26462	5.18394	5.10169	5.01789	4.93255
67	Anonymous participant OD 67			6.99589	6.99482	6.99163	6.9863	6.97885	6.96927	6.95756	6.94374	6.9278	6.90976	6.8896	6.86735	6.84301	6.81658	6.78808	6.75751	6.72488	6.6902	6.65348	6.61474	6.57398	6.53122	6.48647	6.43975	6.39106	6.34043	6.28786	6.23338	6.177	6.11874	6.05862	5.99665	5.93285	5.86725	5.79985	5.7307	5.65979	5.58716	5.51283	5.43683	5.35916	5.27986	5.19896	5.11647	5.03242	4.94684
68	Anonymous participant OD 68			6.99418	6.99311	6.98991	6.98459	6.97714	6.96756	6.95586	6.94204	6.92611	6.90807	6.88792	6.86567	6.84134	6.81492	6.78642	6.75585	6.72323	6.68856	6.65186	6.61312	6.57237	6.52963	6.48489	6.43817	6.3895	6.33888	6.28632	6.23186	6.17549	6.11724	6.05713	5.99518	5.9314	5.86581	5.79843	5.72929	5.65841	5.5858	5.51149	5.4355	5.35785	5.27857	5.19769	5.11522	5.03119	4.94563
69	Anonymous participant OD 69			6.39406	6.39309	6.39017	6.3853	6.37849	6.36973	6.36185	6.35591	6.3493	6.33942	6.32372	6.30329	6.28095	6.25669	6.23053	6.20247	6.17252	6.14069	6.10699	6.07143	6.03402	5.99477	5.9537	5.91081	5.86612	5.81965	5.7714	5.72139	5.66965	5.61617	5.56098	5.5041	5.44555	5.38533	5.32347	5.26	5.19492	5.12826	5.06003	4.99026	4.91898	4.84619	4.77193	4.69622	4.61908	4.54052
70	Anonymous participant OD 70			6.98874	6.98767	6.98448	6.97916	6.97171	6.96214	6.95045	6.93665	6.92072	6.9027	6.88256	6.86034	6.83602	6.80962	6.78114	6.7506	6.71801	6.68336	6.64669	6.60798	6.56727	6.52455	6.47985	6.43317	6.38453	6.33395	6.28144	6.22701	6.17069	6.11249	6.05243	5.99052	5.92679	5.86125	5.79393	5.72484	5.65401	5.58145	5.5072	5.43127	5.35368	5.27447	5.19365	5.11124	5.02728	4.94178
71	Anonymous participant OD 71			6.97903	6.97797	6.97478	6.96947	6.96203	6.95247	6.9408	6.92701	6.91111	6.89311	6.873	6.85081	6.82652	6.80016	6.77172	6.74123	6.70867	6.67408	6.63745	6.5988	6.55814	6.51549	6.47084	6.42423	6.37566	6.32515	6.27271	6.21836	6.16212	6.104	6.04402	5.9822	5.91855	5.85311	5.78588	5.71689	5.64615	5.5737	5.49955	5.42372	5.34625	5.26714	5.18643	5.10414	5.02029	4.93492
72	Anonymous participant OD 72			6.96664	6.96558	6.9624	6.95709	6.94967	6.94013	6.92848	6.91471	6.89884	6.88087	6.8608	6.8361	6.80584	6.77238	6.73807	6.70523	6.67285	6.63844	6.60201	6.56356	6.52312	6.48069	6.43629	6.38992	6.34161	6.29137	6.23921	6.18515	6.12921	6.0714	6.01174	5.95025	5.88695	5.82185	5.75498	5.68636	5.616	5.54394	5.47018	5.39476	5.3177	5.23901	5.15873	5.07688	4.99348	4.90857
73	Anonymous participant OD 73			6.9869	6.98584	6.98265	6.97733	6.96988	6.96031	6.94863	6.93482	6.91891	6.90088	6.88076	6.85853	6.83422	6.80783	6.77936	6.74883	6.71624	6.68161	6.64494	6.60625	6.56554	6.52283	6.47814	6.43148	6.38285	6.33228	6.27979	6.22538	6.16907	6.11088	6.05083	5.98894	5.92523	5.85971	5.7924	5.72333	5.65252	5.57999	5.50575	5.42984	5.35228	5.27308	5.19228	5.1099	5.02596	4.94049
74	Anonymous participant OD 74			6.98606	6.98499	6.9818	6.97648	6.96904	6.95947	6.94779	6.93399	6.91807	6.90005	6.87992	6.8577	6.8334	6.80701	6.77854	6.74801	6.71543	6.6808	6.64414	6.60545	6.56475	6.52205	6.47736	6.4307	6.38208	6.33152	6.27903	6.22462	6.16832	6.11014	6.0501	5.98822	5.92451	5.859	5.7917	5.72264	5.65184	5.57931	5.50509	5.42919	5.35163	5.27245	5.19165	5.10928	5.02535	4.93989
75	Anonymous participant OD 75			6.99548	6.99441	6.99122	6.98589	6.97844	6.96886	6.95716	6.94334	6.9274	6.90935	6.8892	6.86695	6.84261	6.81619	6.78768	6.75711	6.72449	6.68981	6.6531	6.61436	6.5736	6.53084	6.4861	6.43937	6.39069	6.34006	6.2875	6.23302	6.17664	6.11838	6.05826	5.9963	5.9325	5.8669	5.79952	5.73036	5.65946	5.58684	5.51251	5.43651	5.35885	5.27956	5.19865	5.11617	5.03213	4.94655
76	Anonymous participant OD 76			6.97384	6.97277	6.96959	6.96428	6.95685	6.9473	6.93563	6.92186	6.90597	6.88798	6.86789	6.84571	6.82144	6.7951	6.76668	6.73621	6.70368	6.66911	6.63251	6.59389	6.55326	6.51064	6.46603	6.41945	6.37092	6.32044	6.26804	6.21373	6.15753	6.09946	6.03952	5.97775	5.91415	5.84875	5.78157	5.71263	5.64195	5.56955	5.49546	5.41969	5.34227	5.26322	5.18257	5.10034	5.01656	4.93125
77	Anonymous participant OD 77			6.65078	6.64976	6.64672	6.64166	6.63458	6.62547	6.61434	6.6012	6.58605	6.56889	6.54974	6.52858	6.50544	6.48032	6.45322	6.42416	6.39314	6.36017	6.32526	6.28843	6.24969	6.20903	6.16649	6.12207	6.07579	6.02765	5.97768	5.92589	5.87229	5.8169	5.75974	5.70083	5.64018	5.57781	5.51374	5.448	5.38059	5.31155	5.24088	5.16862	5.09479	5.0194	4.94249	4.86407	4.78417	4.70281
78	Anonymous participant OD 78			6.94836	6.9473	6.94413	6.93884	6.93143	6.92192	6.9103	6.89657	6.88074	6.86281	6.8428	6.82336	6.80548	6.78671	6.76459	6.73674	6.70421	6.66964	6.63303	6.59441	6.55378	6.51115	6.46654	6.41995	6.37142	6.32094	6.26853	6.21422	6.15802	6.09993	6.03999	5.97821	5.91461	5.84921	5.78203	5.71308	5.64239	5.56999	5.49589	5.42011	5.34269	5.26363	5.18298	5.10074	5.01695	4.93163
79	Anonymous participant OD 79			6.97903	6.97797	6.97478	6.96947	6.96203	6.95247	6.9408	6.92701	6.91111	6.89311	6.873	6.85081	6.82652	6.80016	6.77172	6.74123	6.70867	6.67408	6.63745	6.5988	6.55814	6.51549	6.47084	6.42423	6.37566	6.32515	6.27271	6.21836	6.16212	6.104	6.04402	5.9822	5.91855	5.85311	5.78588	5.71689	5.64615	5.5737	5.49955	5.42372	5.34625	5.26714	5.18643	5.10414	5.02029	4.93492
80	Anonymous participant OD 80			6.99132	6.99025	6.98706	6.98174	6.97429	6.96471	6.95302	6.9392	6.92328	6.90524	6.8851	6.86287	6.83854	6.81213	6.78364	6.75309	6.72049	6.68583	6.64914	6.61042	6.56969	6.52696	6.48224	6.43554	6.38689	6.33628	6.28375	6.22931	6.17297	6.11474	6.05466	5.99273	5.92897	5.86341	5.79606	5.72695	5.65609	5.58351	5.50923	5.43327	5.35566	5.27641	5.19556	5.11313	5.02913	4.94361
81	Anonymous participant OD 81			6.12872	6.14308	6.1773	6.21806	6.25206	6.26607	6.26419	6.25909	6.25042	6.23781	6.22091	6.20082	6.17884	6.15498	6.12924	6.10164	6.07218	6.04086	6.00771	5.97273	5.93593	5.89732	5.85691	5.81472	5.77076	5.72504	5.68009	5.63681	5.59286	5.54593	5.49386	5.43767	5.37982	5.32033	5.25922	5.19651	5.13221	5.06635	4.99895	4.93003	4.8596	4.7877	4.71433	4.63953	4.56332	4.48572
82	Anonymous participant OD 82			6.12872	6.14308	6.1773	6.21806	6.25206	6.26607	6.26419	6.25909	6.25042	6.23781	6.22091	6.20082	6.17884	6.15498	6.12924	6.10164	6.07218	6.04086	6.00771	5.97273	5.93593	5.89732	5.85691	5.81472	5.77076	5.72504	5.68009	5.63681	5.59286	5.54593	5.49386	5.43767	5.37982	5.32033	5.25922	5.19651	5.13221	5.06635	4.99895	4.93003	4.8596	4.7877	4.71433	4.63953	4.56332	4.48572
83	Anonymous participant OD 83			5.923	5.9221	5.91939	5.91488	5.90857	5.90046	5.89055	5.87885	5.86536	5.85008	5.83301	5.81671	5.8021	5.78684	5.76861	5.74511	5.71737	5.68789	5.65668	5.62374	5.58909	5.55273	5.51469	5.47496	5.43357	5.39052	5.34583	5.29951	5.25158	5.20205	5.15093	5.10045	5.0514	5.0017	4.94934	4.89244	4.8319	4.7699	4.70644	4.64155	4.57525	4.50755	4.43848	4.36806	4.2963	4.22324
84	Anonymous participant OD 84			6.9861	6.98503	6.98184	6.97652	6.96908	6.95951	6.94783	6.93403	6.91811	6.90009	6.87996	6.85774	6.83344	6.80705	6.77858	6.74805	6.71547	6.68084	6.64417	6.60549	6.56479	6.52208	6.4774	6.43074	6.38212	6.33156	6.27906	6.22466	6.16836	6.11018	6.05014	5.98826	5.92455	5.85904	5.79174	5.72268	5.65187	5.57935	5.50512	5.42922	5.35166	5.27248	5.19168	5.10931	5.02538	4.93992
85	Anonymous participant OD 85			6.98837	6.9873	6.98411	6.97879	6.97134	6.96178	6.95009	6.93628	6.92036	6.90233	6.8822	6.85997	6.83566	6.80926	6.78078	6.75025	6.71765	6.68301	6.64633	6.60763	6.56692	6.5242	6.4795	6.43283	6.38419	6.33361	6.2811	6.22668	6.17036	6.11216	6.0521	5.9902	5.92647	5.86094	5.79362	5.72454	5.65371	5.58116	5.50691	5.43098	5.3534	5.27419	5.19337	5.11097	5.02701	4.94152
86	Anonymous participant OD 86			6.99427	6.9932	6.99001	6.98468	6.97723	6.96765	6.95595	6.94214	6.9262	6.90816	6.88801	6.86576	6.84143	6.81501	6.78651	6.75595	6.72332	6.68865	6.65195	6.61321	6.57246	6.52971	6.48497	6.43826	6.38958	6.33896	6.28641	6.23194	6.17557	6.11733	6.05721	5.99526	5.93148	5.86589	5.79851	5.72937	5.65848	5.58587	5.51156	5.43557	5.35792	5.27864	5.19776	5.11528	5.03126	4.9457
87	Anonymous participant OD 87			6.98318	6.98212	6.97893	6.97361	6.96617	6.95661	6.94493	6.93113	6.91522	6.89721	6.87709	6.85488	6.83058	6.8042	6.77575	6.74524	6.71267	6.67805	6.6414	6.60273	6.56205	6.51936	6.47469	6.42805	6.37945	6.32891	6.27644	6.22206	6.16578	6.10763	6.04761	5.98576	5.92207	5.85659	5.78932	5.72029	5.64951	5.57702	5.50282	5.42695	5.34943	5.27027	5.18952	5.10718	5.02328	4.93786
88	Anonymous participant OD 88			6.99005	6.98899	6.9858	6.98048	6.97303	6.96346	6.95176	6.93795	6.92203	6.904	6.88386	6.86163	6.83731	6.8109	6.78242	6.75187	6.71927	6.68462	6.64794	6.60923	6.5685	6.52578	6.48107	6.43438	6.38573	6.33514	6.28262	6.22818	6.17185	6.11364	6.05357	5.99165	5.9279	5.86235	5.79502	5.72592	5.65507	5.58251	5.50824	5.43229	5.35469	5.27546	5.19462	5.1122	5.02822	4.94272
[truncated: 315 more columns]

## Sheet: OD_Y
Y coordinate of the limbus mm (Right eyes)
count	Name		Angle (degree)	0	1	2	3	4	5	6	7	8	9	10	11	12	13	14	15	16	17	18	19	20	21	22	23	24	25	26	27	28	29	30	31	32	33	34	35	36	37	38	39	40	41	42	43	44	45
				YL	YL	YL	YL	YL	YL	YL	YL	YL	YL	YL	YL	YL	YL	YL	YL	YL	YL	YL	YL	YL	YL	YL	YL	YL	YL	YL	YL	YL	YL	YL	YL	YL	YL	YL	YL	YL	YL	YL	YL	YL	YL	YL	YL	YL	YL
1	Anonymous participant OD 1			0	0.117633	0.235068	0.352183	0.468944	0.585399	0.701472	0.817028	0.93216	1.04704	1.16194	1.27677	1.39121	1.50523	1.61879	1.73185	1.84366	1.95375	2.06267	2.1711	2.27991	2.38888	2.49713	2.60462	2.71131	2.81718	2.92219	3.02631	3.1295	3.23175	3.33301	3.43142	3.52527	3.61478	3.70024	3.78201	3.8605	3.93619	4.00961	4.08136	4.15208	4.22247	4.29328	4.3653	4.43939	4.51644
2	Anonymous participant OD 2			0	0.121976	0.243914	0.365779	0.487532	0.609136	0.730555	0.851751	0.972688	1.09333	1.21364	1.33357	1.45311	1.5722	1.69081	1.8089	1.92644	2.0434	2.15974	2.27541	2.3904	2.50465	2.61815	2.73084	2.8427	2.9537	3.0638	3.17296	3.28116	3.38836	3.49453	3.59963	3.70363	3.80651	3.90823	4.00876	4.10806	4.20612	4.30289	4.39835	4.49248	4.58523	4.67659	4.76652	4.85501	4.94201
3	Anonymous participant OD 3			0	0.117726	0.235416	0.353034	0.470545	0.587912	0.705101	0.822074	0.938798	1.05523	1.17135	1.28762	1.40435	1.52114	1.63743	1.75249	1.86637	1.97968	2.09238	2.20445	2.31585	2.42654	2.53649	2.64568	2.75405	2.86159	2.96825	3.07401	3.17883	3.28269	3.38555	3.48737	3.58813	3.6878	3.78635	3.88374	3.97995	4.07494	4.1687	4.26119	4.35237	4.44223	4.53074	4.61787	4.70359	4.78788
4	Anonymous participant OD 4			0	0.121841	0.243646	0.365376	0.486995	0.608465	0.72975	0.850813	0.971616	1.09212	1.2123	1.3321	1.4515	1.57046	1.68894	1.80691	1.92432	2.04115	2.15736	2.27291	2.38776	2.50189	2.61526	2.72783	2.83957	2.95045	3.06042	3.16947	3.27755	3.38463	3.49068	3.59566	3.69955	3.80232	3.90392	4.00434	4.10354	4.20148	4.29815	4.39351	4.48753	4.58018	4.67144	4.76127	4.84965	4.93656
5	Anonymous participant OD 5			0	0.122052	0.244067	0.366008	0.487837	0.609517	0.731012	0.852284	0.973297	1.09401	1.2144	1.33441	1.45401	1.57318	1.69186	1.81003	1.92765	2.04468	2.16109	2.27684	2.39189	2.50622	2.61978	2.73255	2.84448	2.95555	3.06572	3.17495	3.28321	3.39048	3.49671	3.60188	3.70595	3.80889	3.91067	4.01126	4.11063	4.20875	4.30558	4.40111	4.49529	4.5881	4.67952	4.7695	4.85804	4.9451
6	Anonymous participant OD 6			0	0.121836	0.243634	0.365358	0.486971	0.608436	0.729715	0.850772	0.97157	1.09207	1.21224	1.33149	1.44942	1.56637	1.68288	1.79968	1.91662	2.03299	2.14873	2.26381	2.37821	2.49189	2.6048	2.71692	2.82821	2.93865	3.04818	3.15679	3.26444	3.37109	3.47671	3.58128	3.68476	3.78711	3.88831	3.98832	4.08712	4.18468	4.28096	4.37593	4.46958	4.56186	4.65275	4.74223	4.83026	4.91682
7	Anonymous participant OD 7			0	0.120212	0.240388	0.360491	0.480484	0.60033	0.719994	0.839438	0.958627	1.07752	1.19609	1.3143	1.4321	1.54947	1.66636	1.78275	1.89859	2.01386	2.12851	2.24252	2.35584	2.46844	2.5803	2.69136	2.80161	2.911	3.01951	3.12709	3.23373	3.33938	3.44401	3.54763	3.65026	3.75186	3.85242	3.95189	4.05026	4.1475	4.24357	4.33845	4.43212	4.52454	4.61569	4.70553	4.79405	4.88121
8	Anonymous participant OD 8			0	0.120565	0.241092	0.361547	0.481891	0.602088	0.722102	0.841896	0.961434	1.08068	1.19959	1.31814	1.43629	1.554	1.67124	1.78797	1.90415	2.01976	2.13475	2.24909	2.36274	2.47567	2.58785	2.69924	2.80981	2.91953	3.02835	3.13625	3.2432	3.34916	3.45409	3.55798	3.66078	3.76247	3.86301	3.96237	4.06053	4.15745	4.25311	4.34746	4.4405	4.53218	4.62248	4.71137	4.79883	4.88483
9	Anonymous participant OD 9			0	0.116865	0.233694	0.350451	0.467103	0.583611	0.699942	0.81606	0.931929	1.04751	1.16278	1.27769	1.39222	1.50631	1.61995	1.7331	1.84572	1.95778	2.06924	2.18007	2.29023	2.3997	2.50844	2.61641	2.72359	2.82993	2.93542	3.04001	3.14367	3.24638	3.34809	3.44879	3.54844	3.64701	3.74446	3.84078	3.9374	4.03501	4.13226	4.22773	4.31982	4.40901	4.49686	4.58334	4.66842	4.75208
10	Anonymous participant OD 10			0	0.122041	0.244045	0.365974	0.487792	0.609462	0.730945	0.852207	0.973208	1.09391	1.21429	1.33429	1.45388	1.57304	1.69171	1.80987	1.92747	2.04449	2.16089	2.27663	2.39167	2.50599	2.61954	2.7323	2.84422	2.95528	3.06544	3.17466	3.28292	3.39017	3.49639	3.60155	3.70561	3.80855	3.91032	4.0109	4.11026	4.20837	4.30519	4.4007	4.49488	4.58768	4.67909	4.76907	4.8576	4.94465
11	Anonymous participant OD 11			0	0.112026	0.22418	0.336513	0.448989	0.561491	0.673913	0.786262	0.898548	1.0108	1.1231	1.23554	1.3482	1.46103	1.574	1.68703	1.80056	1.91479	2.02915	2.14293	2.25527	2.36637	2.47701	2.58718	2.69682	2.8059	2.91438	3.02222	3.12937	3.2358	3.34148	3.44635	3.55039	3.65355	3.7558	3.85709	3.9574	4.05667	4.15487	4.25197	4.34793	4.4427	4.53626	4.62857	4.71959	4.80928
12	Anonymous participant OD 12			0	0.122068	0.244099	0.366055	0.4879	0.609596	0.731107	0.852394	0.973423	1.09415	1.21455	1.33458	1.4542	1.57338	1.69208	1.81027	1.9279	2.04494	2.16137	2.27713	2.3922	2.50654	2.62012	2.7329	2.84485	2.95593	3.06611	3.17536	3.28364	3.39092	3.49717	3.60235	3.70643	3.80939	3.91118	4.01178	4.11116	4.20929	4.30614	4.40167	4.49587	4.58869	4.68012	4.77012	4.85867	4.94574
13	Anonymous participant OD 13			0	0.121769	0.243501	0.365159	0.486705	0.608104	0.729317	0.850307	0.971039	1.09148	1.21158	1.33131	1.45064	1.56953	1.68794	1.80583	1.92318	2.03994	2.15608	2.27156	2.38634	2.50041	2.61371	2.72621	2.83789	2.94869	3.05861	3.16758	3.2756	3.38262	3.4886	3.59353	3.69736	3.80006	3.9016	4.00196	4.1011	4.19899	4.2956	4.3909	4.48486	4.57746	4.66866	4.75844	4.84677	4.93363
14	Anonymous participant OD 14			0	0.11661	0.233184	0.349687	0.466083	0.582338	0.698415	0.814279	0.929896	1.04523	1.16024	1.2749	1.38918	1.50303	1.61642	1.72932	1.84169	1.9535	2.06472	2.17531	2.28523	2.39342	2.49926	2.60359	2.70741	2.81189	2.9167	3.02063	3.12363	3.22568	3.32675	3.42681	3.52582	3.62376	3.72059	3.81629	3.91083	4.00418	4.0963	4.18718	4.27679	4.36509	4.45206	4.53768	4.62191	4.70474
15	Anonymous participant OD 15			0	0.102931	0.206053	0.309397	0.412827	0.51603	0.61889	0.721562	0.824013	0.926214	1.02813	1.13025	1.23288	1.33562	1.43792	1.53904	1.63905	1.73856	1.83754	1.93596	2.03379	2.13166	2.23002	2.3285	2.42663	2.52389	2.62058	2.71702	2.81266	2.90683	2.99884	3.08903	3.17828	3.26657	3.35386	3.44012	3.52534	3.60949	3.69254	3.77446	3.85523	3.93658	4.01926	4.10173	4.18229	4.25912
16	Anonymous participant OD 16			0	0.120418	0.240799	0.361108	0.481306	0.601357	0.721225	0.840874	0.960266	1.07937	1.19814	1.31654	1.43455	1.55212	1.66921	1.7858	1.90184	2.01731	2.13215	2.24635	2.35987	2.47267	2.58471	2.69597	2.8064	2.91598	3.02467	3.13244	3.23926	3.34509	3.4499	3.55366	3.65634	3.7579	3.85832	3.95756	4.0556	4.1524	4.24794	4.34218	4.4351	4.52668	4.61687	4.70565	4.793	4.87889
17	Anonymous participant OD 17			0	0.118511	0.236986	0.355389	0.473684	0.591834	0.709804	0.827558	0.94506	1.06227	1.17916	1.2957	1.41183	1.52754	1.64278	1.75752	1.87173	1.98536	2.09839	2.21078	2.3225	2.43351	2.54378	2.65327	2.76196	2.8698	2.97677	3.08284	3.18796	3.29212	3.39527	3.49738	3.59844	3.69839	3.79722	3.89489	3.99138	4.08665	4.18067	4.27342	4.36487	4.45499	4.54376	4.63113	4.7171	4.80163
18	Anonymous participant OD 18			0	0.121912	0.243787	0.365588	0.487277	0.608818	0.730173	0.851306	0.97218	1.09276	1.213	1.33288	1.45235	1.57137	1.68992	1.80795	1.92544	2.04233	2.15861	2.27422	2.38915	2.50334	2.61678	2.72941	2.84122	2.95216	3.0622	3.17131	3.27945	3.38659	3.4927	3.59775	3.7017	3.80452	3.90619	4.00666	4.10592	4.20392	4.30064	4.39606	4.49013	4.58284	4.67415	4.76403	4.85247	4.93942
19	Anonymous participant OD 19			0	0.113479	0.226924	0.3403	0.453572	0.566706	0.679954	0.793551	0.907309	1.02086	1.13367	1.24571	1.35736	1.4686	1.5794	1.68971	1.79951	1.90876	2.01743	2.12549	2.2329	2.33962	2.44564	2.55091	2.6554	2.75908	2.86193	2.9639	3.06497	3.1651	3.26427	3.36245	3.4596	3.5557	3.65072	3.74462	3.83739	3.92898	4.01938	4.10855	4.19647	4.28311	4.36845	4.45246	4.53511	4.61638
20	Anonymous participant OD 20			0	0.121963	0.243889	0.36574	0.487481	0.609072	0.730479	0.851662	0.972586	1.09321	1.21351	1.33343	1.45295	1.57203	1.69063	1.80871	1.92624	2.04319	2.15951	2.27517	2.39015	2.50439	2.61787	2.73055	2.84241	2.95339	3.06348	3.17263	3.28082	3.38801	3.49416	3.59925	3.70325	3.80611	3.90782	4.00834	4.10763	4.20568	4.30244	4.39789	4.49201	4.58475	4.6761	4.76602	4.8545	4.94149
21	Anonymous participant OD 21			0	0.121087	0.242109	0.36303	0.483813	0.604422	0.724821	0.844973	0.964844	1.0844	1.2036	1.32241	1.44081	1.55875	1.6762	1.79313	1.9095	2.02529	2.14046	2.25498	2.36882	2.48194	2.59432	2.70592	2.81672	2.92669	3.03578	3.14395	3.25116	3.35738	3.46257	3.56671	3.66977	3.7717	3.87249	3.9721	4.0705	4.16766	4.26355	4.35814	4.4514	4.5433	4.63383	4.72294	4.81061	4.89682
22	Anonymous participant OD 22			0	0.121585	0.243132	0.364606	0.485968	0.607183	0.728212	0.84902	0.969569	1.08982	1.20974	1.3288	1.44663	1.56353	1.67999	1.79666	1.91341	2.02957	2.14512	2.26002	2.37422	2.4877	2.60043	2.71236	2.82347	2.93371	3.04307	3.15149	3.25896	3.36543	3.47088	3.57527	3.67857	3.78075	3.88178	3.98163	4.08026	4.17766	4.27377	4.36859	4.46208	4.5542	4.64494	4.73427	4.82215	4.90857
23	Anonymous participant OD 23			0	0.118736	0.237436	0.356064	0.474583	0.592958	0.711434	0.830243	0.949196	1.06793	1.18591	1.30311	1.41991	1.53628	1.65218	1.76758	1.88244	1.99672	2.1104	2.22343	2.33579	2.44744	2.55834	2.66846	2.77777	2.88623	2.99381	3.10048	3.20621	3.31096	3.4147	3.5174	3.61903	3.71956	3.81895	3.91718	4.01581	4.11553	4.21496	4.31252	4.40654	4.49752	4.58713	4.67535	4.76214	4.84747
24	Anonymous participant OD 24			0	0.121784	0.243531	0.365204	0.486766	0.60818	0.729408	0.850414	0.971161	1.09161	1.21173	1.33148	1.45082	1.56973	1.68815	1.80606	1.92342	2.04019	2.15635	2.27184	2.38664	2.50072	2.61403	2.72655	2.83824	2.94906	3.05899	3.16798	3.27601	3.38304	3.48904	3.59398	3.69782	3.80053	3.90209	4.00246	4.10161	4.19951	4.29613	4.39145	4.48542	4.57803	4.66925	4.75904	4.84738	4.93425
25	Anonymous participant OD 25			0	0.110976	0.221919	0.332794	0.443568	0.554207	0.664676	0.774944	0.884975	0.994737	1.1042	1.21332	1.32207	1.43042	1.53833	1.64578	1.75195	1.85634	1.95954	2.0623	2.16555	2.26905	2.37187	2.47397	2.57531	2.67586	2.77561	2.8745	2.97252	3.06964	3.16582	3.26103	3.35525	3.44845	3.5406	3.63168	3.72164	3.81047	3.89814	3.98463	4.0699	4.15393	4.23669	4.31816	4.39832	4.47714
26	Anonymous participant OD 26			0	0.121964	0.243891	0.365743	0.487484	0.609076	0.730483	0.851668	0.972593	1.09322	1.21352	1.33344	1.45296	1.57204	1.69064	1.80872	1.92626	2.0432	2.15952	2.27519	2.39016	2.50441	2.61789	2.73057	2.84243	2.95341	3.0635	3.17265	3.28084	3.38803	3.49418	3.59928	3.70327	3.80614	3.90785	4.00836	4.10766	4.2057	4.30247	4.39792	4.49204	4.58478	4.67613	4.76606	4.85453	4.94152
27	Anonymous participant OD 27			0	0.121881	0.243725	0.365495	0.487154	0.608664	0.729989	0.851091	0.971934	1.09248	1.2127	1.33254	1.45198	1.57098	1.68949	1.8075	1.92495	2.04182	2.15806	2.27365	2.38854	2.50271	2.61612	2.72872	2.8405	2.95141	3.06142	3.1705	3.27862	3.38573	3.49182	3.59684	3.70076	3.80356	3.9052	4.00565	4.10488	4.20286	4.29955	4.39494	4.48899	4.58168	4.67296	4.76283	4.85124	4.93818
28	Anonymous participant OD 28			0	0.112432	0.22483	0.337159	0.449385	0.561475	0.673393	0.785107	0.896581	1.00778	1.11868	1.22923	1.33941	1.44918	1.55851	1.66736	1.77571	1.88352	1.99075	2.09738	2.20336	2.30868	2.41329	2.51717	2.62028	2.72259	2.82408	2.9247	3.02443	3.12324	3.2211	3.31648	3.40862	3.49879	3.5884	3.67903	3.77017	3.86016	3.94897	4.03658	4.12296	4.20809	4.29193	4.37447	4.45567	4.53552
29	Anonymous participant OD 29			0	0.121857	0.243676	0.365422	0.487056	0.608541	0.729842	0.85092	0.971738	1.09226	1.21245	1.33227	1.45169	1.57066	1.68915	1.80713	1.92456	2.04141	2.15763	2.27319	2.38806	2.50221	2.61559	2.72817	2.83993	2.95082	3.06081	3.16987	3.27796	3.38505	3.49111	3.59611	3.70002	3.80279	3.90441	4.00484	4.10405	4.20201	4.29869	4.39406	4.48809	4.58075	4.67202	4.76187	4.85026	4.93718
30	Anonymous participant OD 30			0	0.121824	0.243611	0.365323	0.486925	0.608377	0.729645	0.850691	0.971477	1.09197	1.21212	1.33191	1.4513	1.57024	1.6887	1.80665	1.92404	2.04086	2.15705	2.27258	2.38742	2.50153	2.61488	2.72744	2.83916	2.95002	3.05998	3.16901	3.27708	3.38414	3.49017	3.59515	3.69902	3.80177	3.90336	4.00376	4.10295	4.20088	4.29753	4.39288	4.48688	4.57952	4.67077	4.76059	4.84896	4.93585
31	Anonymous participant OD 31			0	0.12192	0.243803	0.365612	0.48731	0.608859	0.730222	0.851363	0.972245	1.09283	1.21308	1.33297	1.45244	1.57148	1.69003	1.80808	1.92557	2.04247	2.15875	2.27438	2.38931	2.50351	2.61695	2.7296	2.84141	2.95236	3.0624	3.17152	3.27967	3.38682	3.49293	3.59799	3.70195	3.80478	3.90645	4.00693	4.10619	4.2042	4.30093	4.39635	4.49043	4.58314	4.67446	4.76435	4.85279	4.93975
32	Anonymous participant OD 32			0	0.110976	0.221919	0.332794	0.443568	0.554207	0.664676	0.774944	0.884975	0.994737	1.1042	1.21332	1.32207	1.43042	1.53833	1.64578	1.75195	1.85634	1.95954	2.0623	2.16555	2.26905	2.37187	2.47397	2.57531	2.67586	2.77561	2.8745	2.97252	3.06964	3.16582	3.26103	3.35525	3.44845	3.5406	3.63168	3.72164	3.81047	3.89814	3.98463	4.0699	4.15393	4.23669	4.31816	4.39832	4.47714
33	Anonymous participant OD 33			0	0.122076	0.244114	0.366079	0.487931	0.609636	0.731154	0.85245	0.973486	1.09423	1.21463	1.33467	1.4543	1.57348	1.69219	1.81038	1.92802	2.04508	2.16151	2.27728	2.39236	2.50671	2.62029	2.73308	2.84503	2.95612	3.06631	3.17557	3.28385	3.39114	3.49739	3.60258	3.70667	3.80963	3.91143	4.01204	4.11143	4.20957	4.30642	4.40196	4.49616	4.58899	4.68042	4.77043	4.85899	4.94606
34	Anonymous participant OD 34			0	0.109909	0.219785	0.329594	0.439303	0.548877	0.658285	0.767492	0.876465	0.985171	1.09358	1.20165	1.30936	1.41667	1.52354	1.62995	1.73587	1.84126	1.94608	2.05032	2.15393	2.25688	2.35915	2.46069	2.56149	2.66151	2.76071	2.85908	2.95657	3.05317	3.14883	3.24488	3.34193	3.43881	3.53418	3.62658	3.71642	3.80513	3.89267	3.97904	4.06419	4.1481	4.23075	4.31211	4.39215	4.47086
35	Anonymous participant OD 35			0	0.121486	0.242936	0.364311	0.485575	0.606692	0.727623	0.848333	0.968785	1.08894	1.20877	1.32822	1.44727	1.56589	1.68402	1.80164	1.91871	2.0352	2.15107	2.26628	2.3808	2.49363	2.6042	2.71328	2.82179	2.93083	3.04007	3.14839	3.25575	3.36212	3.46747	3.57175	3.67495	3.77704	3.87797	3.97771	4.07626	4.17358	4.26964	4.36441	4.45788	4.55	4.64075	4.73011	4.81805	4.90453
36	Anonymous participant OD 36			0	0.121486	0.242936	0.364311	0.485575	0.606692	0.727623	0.848333	0.968785	1.08894	1.20877	1.32822	1.44727	1.56589	1.68402	1.80164	1.91871	2.0352	2.15107	2.26628	2.3808	2.49363	2.6042	2.71328	2.82179	2.93083	3.04007	3.14839	3.25575	3.36212	3.46747	3.57175	3.67495	3.77704	3.87797	3.97771	4.07626	4.17358	4.26964	4.36441	4.45788	4.55	4.64075	4.73011	4.81805	4.90453
37	Anonymous participant OD 37			0	0.121819	0.2436	0.365308	0.486904	0.608352	0.729614	0.850654	0.971436	1.09192	1.21207	1.33186	1.45123	1.57017	1.68863	1.80657	1.92396	2.04077	2.15695	2.27248	2.38732	2.50143	2.61477	2.72732	2.83904	2.9499	3.05985	3.16888	3.27694	3.384	3.49003	3.59499	3.69886	3.80161	3.9032	4.00359	4.10277	4.2007	4.29735	4.39269	4.48669	4.57933	4.67057	4.76038	4.84875	4.93564
38	Anonymous participant OD 38			0	0.103371	0.20671	0.309986	0.413167	0.516223	0.619122	0.721832	0.824322	0.926561	1.02852	1.13065	1.23327	1.336	1.43827	1.5394	1.63943	1.73896	1.83797	1.93641	2.03426	2.13149	2.22808	2.32398	2.41918	2.51364	2.60734	2.70024	2.79231	2.88354	2.97389	3.06466	3.15647	3.24814	3.33837	3.42572	3.51058	3.59438	3.67708	3.75866	3.83909	3.91835	3.99642	4.07328	4.14889	4.22324
39	Anonymous participant OD 39			0	0.122009	0.243981	0.365878	0.487664	0.609301	0.730753	0.851983	0.972952	1.09363	1.21397	1.33394	1.4535	1.57262	1.69126	1.80939	1.92697	2.04396	2.16032	2.27603	2.39105	2.50533	2.61886	2.73158	2.84348	2.9545	3.06463	3.17382	3.28205	3.38928	3.49548	3.60061	3.70464	3.80754	3.90929	4.00984	4.10918	4.20726	4.30406	4.39955	4.4937	4.58648	4.67786	4.76782	4.85632	4.94335
40	Anonymous participant OD 40			0	0.109151	0.218269	0.32732	0.436272	0.545091	0.653744	0.762197	0.870419	0.978375	1.08603	1.19336	1.30032	1.40689	1.51303	1.61871	1.7239	1.82856	1.93266	2.03617	2.13907	2.24131	2.34287	2.44372	2.54382	2.64315	2.74167	2.83936	2.93618	3.0321	3.12711	3.22116	3.31423	3.40629	3.49731	3.58727	3.67614	3.76388	3.85048	3.93591	4.02013	4.10314	4.18489	4.26537	4.34454	4.4224
41	Anonymous participant OD 41			0	0.113811	0.227587	0.341294	0.454897	0.568362	0.681381	0.793665	0.905325	1.01664	1.12806	1.23954	1.35064	1.46133	1.57158	1.68135	1.7906	1.89932	2.00745	2.11497	2.22184	2.32711	2.43024	2.53195	2.63315	2.73487	2.83681	2.93789	3.03807	3.13732	3.23562	3.33294	3.42924	3.52449	3.61868	3.71176	3.8037	3.89449	3.9841	4.07249	4.15964	4.24382	4.32423	4.40234	4.47976	4.5582
42	Anonymous participant OD 42			0	0.121764	0.243491	0.365143	0.486685	0.608078	0.729286	0.850272	0.970999	1.09143	1.21153	1.33126	1.45058	1.56946	1.68787	1.80576	1.9231	2.03985	2.15598	2.27146	2.38624	2.5003	2.6136	2.7261	2.83777	2.94857	3.05848	3.16745	3.27546	3.38247	3.48846	3.59338	3.6972	3.7999	3.90144	4.00179	4.10093	4.19881	4.29542	4.39071	4.48467	4.57727	4.66847	4.75824	4.84657	4.93342
43	Anonymous participant OD 43			0	0.121896	0.243754	0.365538	0.487211	0.608736	0.730075	0.851191	0.972049	1.09261	1.21284	1.3327	1.45215	1.57116	1.68969	1.80771	1.92518	2.04206	2.15832	2.27392	2.38883	2.50301	2.61642	2.72904	2.84083	2.95176	3.06178	3.17088	3.279	3.38613	3.49223	3.59726	3.7012	3.80401	3.90566	4.00612	4.10536	4.20335	4.30006	4.39546	4.48952	4.58222	4.67351	4.76339	4.85181	4.93876
44	Anonymous participant OD 44			0	0.121952	0.243868	0.365708	0.487438	0.609019	0.730414	0.851588	0.972501	1.09312	1.2134	1.33332	1.45283	1.57189	1.69048	1.80855	1.92607	2.04301	2.15932	2.27498	2.38994	2.50417	2.61764	2.73032	2.84216	2.95313	3.06321	3.17235	3.28053	3.38771	3.49385	3.59894	3.70292	3.80578	3.90748	4.00799	4.10727	4.20531	4.30206	4.39751	4.49161	4.58435	4.67569	4.76561	4.85407	4.94106
45	Anonymous participant OD 45			0	0.121952	0.243868	0.365708	0.487438	0.609019	0.730414	0.851588	0.972501	1.09312	1.2134	1.33332	1.45283	1.57189	1.69048	1.80855	1.92607	2.04301	2.15932	2.27498	2.38994	2.50417	2.61764	2.73032	2.84216	2.95313	3.06321	3.17235	3.28053	3.38771	3.49385	3.59894	3.70292	3.80578	3.90748	4.00799	4.10727	4.20531	4.30206	4.39751	4.49161	4.58435	4.67569	4.76561	4.85407	4.94106
46	Anonymous participant OD 46			0	0.121972	0.243906	0.365767	0.487516	0.609116	0.730531	0.851723	0.972656	1.09329	1.2136	1.33353	1.45306	1.57214	1.69075	1.80884	1.92638	2.04333	2.15966	2.27534	2.39032	2.50457	2.61806	2.73075	2.84261	2.9536	3.0637	3.17286	3.28105	3.38825	3.49441	3.59951	3.70351	3.80639	3.9081	4.00862	4.10793	4.20598	4.30275	4.39821	4.49233	4.58508	4.67644	4.76637	4.85484	4.94184
47	Anonymous participant OD 47			0	0.117906	0.235775	0.353573	0.471264	0.58881	0.706453	0.824415	0.942513	1.06039	1.17753	1.2939	1.40988	1.52543	1.64051	1.75509	1.86914	1.98261	2.09549	2.20772	2.31929	2.43014	2.54026	2.6496	2.75814	2.86584	2.97381	3.08262	3.19125	3.29856	3.40322	3.50558	3.60687	3.70706	3.80612	3.90402	4.00073	4.09622	4.19047	4.28344	4.3751	4.46543	4.5544	4.64199	4.72816	4.81288
48	Anonymous participant OD 48			0	0.121808	0.24358	0.365277	0.486863	0.6083	0.729553	0.850583	0.971354	1.09183	1.21197	1.33174	1.45111	1.57004	1.68849	1.80642	1.9238	2.0406	2.15677	2.27229	2.38712	2.50122	2.61455	2.72709	2.8388	2.94965	3.0596	3.16861	3.27666	3.38371	3.48973	3.59469	3.69855	3.80129	3.90287	4.00326	4.10243	4.20035	4.29699	4.39232	4.48631	4.57894	4.67017	4.75998	4.84834	4.93523
49	Anonymous participant OD 49			0	0.121705	0.243372	0.364965	0.486447	0.607781	0.72893	0.849857	0.970525	1.0909	1.21094	1.33061	1.44987	1.5687	1.68704	1.80488	1.92216	2.03886	2.15493	2.27035	2.38508	2.49908	2.61232	2.72477	2.83638	2.94713	3.05699	3.16591	3.27386	3.38082	3.48675	3.59162	3.6954	3.79805	3.89954	3.99984	4.09893	4.19676	4.29332	4.38857	4.48249	4.57503	4.66619	4.75592	4.84421	4.93102
50	Anonymous participant OD 50			0	0.118827	0.237618	0.356337	0.474947	0.593412	0.711697	0.829765	0.94758	1.06511	1.18231	1.29915	1.4156	1.53161	1.64716	1.76221	1.87672	1.99065	2.10399	2.21668	2.32869	2.441	2.55411	2.66716	2.77913	2.88883	2.99651	3.10328	3.2091	3.31394	3.41778	3.52057	3.62229	3.72291	3.82239	3.92071	4.01784	4.11374	4.20839	4.30175	4.39381	4.48636	4.58022	4.67373	4.76513	4.8525
51	Anonymous participant OD 51			0	0.120581	0.241125	0.361595	0.481956	0.602169	0.7222	0.84201	0.961564	1.08082	1.19976	1.31884	1.43838	1.55799	1.67708	1.79491	1.91154	2.0276	2.14303	2.25781	2.37191	2.48528	2.5979	2.70972	2.82072	2.93086	3.0401	3.14842	3.25578	3.36215	3.4675	3.57179	3.67499	3.77707	3.878	3.97775	4.07629	4.17358	4.26961	4.36433	4.45773	4.54977	4.64042	4.72966	4.81745	4.90378
52	Anonymous participant OD 52			0	0.109151	0.218269	0.32732	0.436272	0.545091	0.653744	0.762197	0.870419	0.978375	1.08603	1.19336	1.30032	1.40689	1.51303	1.61871	1.7239	1.82856	1.93266	2.03617	2.13907	2.24131	2.34287	2.44372	2.54382	2.64315	2.74167	2.83936	2.93618	3.0321	3.12711	3.22116	3.31423	3.40629	3.49731	3.58727	3.67614	3.76388	3.85048	3.93591	4.02013	4.10314	4.18489	4.26537	4.34454	4.4224
53	Anonymous participant OD 53			0	0.122116	0.244194	0.366198	0.488091	0.609835	0.731393	0.852728	0.973804	1.09458	1.21503	1.3351	1.45477	1.574	1.69274	1.81098	1.92865	2.04575	2.16221	2.27802	2.39314	2.50753	2.62115	2.73397	2.84596	2.95709	3.06731	3.1766	3.28493	3.39225	3.49854	3.60376	3.70788	3.81088	3.91271	4.01335	4.11277	4.21094	4.30783	4.4034	4.49763	4.59049	4.68195	4.77199	4.86057	4.94768
54	Anonymous participant OD 54			0	0.121897	0.243756	0.365542	0.487216	0.608742	0.730082	0.8512	0.972058	1.09262	1.21285	1.33271	1.45216	1.57118	1.68971	1.80773	1.9252	2.04208	2.15834	2.27394	2.38885	2.50303	2.61645	2.72907	2.84086	2.95179	3.06182	3.17091	3.27904	3.38617	3.49226	3.5973	3.70124	3.80405	3.9057	4.00616	4.1054	4.20339	4.3001	4.39551	4.48957	4.58226	4.67356	4.76344	4.85186	4.93881
55	Anonymous participant OD 55			0	0.121899	0.24376	0.365548	0.487224	0.608751	0.730093	0.851213	0.972074	1.09264	1.21287	1.33273	1.45219	1.5712	1.68974	1.80776	1.92523	2.04211	2.15837	2.27398	2.38889	2.50307	2.61649	2.72912	2.84091	2.95184	3.06186	3.17096	3.27909	3.38622	3.49232	3.59735	3.70129	3.80411	3.90576	4.00622	4.10547	4.20346	4.30017	4.39558	4.48964	4.58233	4.67364	4.76351	4.85194	4.93888
56	Anonymous participant OD 56			0	0.110783	0.221532	0.332214	0.442795	0.553241	0.663518	0.773593	0.883433	0.993003	1.10227	1.2112	1.31977	1.42793	1.53565	1.64291	1.74967	1.8559	1.96155	2.06662	2.17105	2.27482	2.3779	2.48025	2.58185	2.68266	2.78266	2.88181	2.98008	3.07744	3.17386	3.26932	3.36378	3.45722	3.5496	3.64091	3.7311	3.82016	3.90805	3.99475	4.08024	4.16448	4.24746	4.32914	4.4095	4.48852
57	Anonymous participant OD 57			0	0.121888	0.243739	0.365516	0.487181	0.608698	0.73003	0.851139	0.971989	1.09254	1.21276	1.33262	1.45206	1.57106	1.68959	1.8076	1.92506	2.04193	2.15818	2.27378	2.38868	2.50285	2.61626	2.72888	2.84066	2.95158	3.0616	3.17068	3.2788	3.38593	3.49202	3.59704	3.70097	3.80378	3.90542	4.00588	4.10511	4.20309	4.2998	4.39519	4.48925	4.58194	4.67323	4.7631	4.85152	4.93846
58	Anonymous participant OD 58			0	0.119074	0.237895	0.356364	0.474551	0.592691	0.710831	0.828756	0.946427	1.06381	1.18087	1.29757	1.41387	1.52975	1.64516	1.76006	1.87443	1.98823	2.10143	2.21398	2.32586	2.43703	2.54746	2.65711	2.76596	2.87396	2.98108	3.0873	3.19258	3.29688	3.40018	3.50111	3.59898	3.69492	3.79019	3.88619	3.98246	4.07751	4.17133	4.26387	4.35512	4.44504	4.5336	4.62078	4.70656	4.7909
59	Anonymous participant OD 59			0	0.110783	0.221532	0.332214	0.442795	0.553241	0.663518	0.773593	0.883433	0.993003	1.10227	1.2112	1.31977	1.42793	1.53565	1.64291	1.74967	1.8559	1.96155	2.06662	2.17105	2.27482	2.3779	2.48025	2.58185	2.68266	2.78266	2.88181	2.98008	3.07744	3.17386	3.26932	3.36378	3.45722	3.5496	3.64091	3.7311	3.82016	3.90805	3.99475	4.08024	4.16448	4.24746	4.32914	4.4095	4.48852
60	Anonymous participant OD 60			0	0.121938	0.243839	0.365666	0.487382	0.608949	0.73033	0.851489	0.972389	1.09299	1.21326	1.33316	1.45266	1.57171	1.69028	1.80834	1.92585	2.04277	2.15907	2.27471	2.38966	2.50388	2.61734	2.73	2.84183	2.95279	3.06286	3.17199	3.28015	3.38732	3.49345	3.59852	3.70249	3.80534	3.90703	4.00752	4.1068	4.20482	4.30157	4.397	4.49109	4.58382	4.67515	4.76506	4.85351	4.94049
61	Anonymous participant OD 61			0	0.116072	0.232109	0.348075	0.463935	0.579653	0.695195	0.810526	0.925609	1.04041	1.1549	1.26903	1.38277	1.4961	1.60897	1.72135	1.8332	1.9445	2.0552	2.16528	2.2747	2.38343	2.49142	2.59867	2.70511	2.81074	2.91551	3.01939	3.12235	3.22436	3.32539	3.4254	3.52437	3.62227	3.71907	3.81473	3.90923	4.00254	4.09463	4.18547	4.27504	4.3633	4.45024	4.53582	4.62002	4.70281
62	Anonymous participant OD 62			0	0.12211	0.244182	0.36618	0.488067	0.609805	0.731357	0.852686	0.973756	1.09453	1.21497	1.33504	1.4547	1.57392	1.69266	1.81089	1.92856	2.04564	2.16211	2.27791	2.39302	2.5074	2.62102	2.73384	2.84582	2.95694	3.06716	3.17645	3.28476	3.39208	3.49836	3.60358	3.7077	3.81069	3.91252	4.01316	4.11257	4.21073	4.30761	4.40318	4.49741	4.59026	4.68172	4.77175	4.86033	4.94743
63	Anonymous participant OD 63			0	0.118698	0.237144	0.355239	0.47305	0.590816	0.708583	0.826134	0.943434	1.06045	1.17714	1.29347	1.4094	1.52491	1.63995	1.7545	1.8685	1.98194	2.09478	2.20698	2.3185	2.42932	2.5394	2.64871	2.75721	2.86487	2.97051	3.07354	3.17487	3.27559	3.37692	3.47848	3.57899	3.6784	3.7767	3.87384	3.96981	4.06456	4.15808	4.25033	4.34128	4.43092	4.5192	4.60611	4.69161	4.77568
64	Anonymous participant OD 64			0	0.121735	0.243432	0.365056	0.486568	0.607932	0.729111	0.850067	0.970765	1.09117	1.21124	1.33094	1.45023	1.56909	1.68746	1.80532	1.92264	2.03936	2.15547	2.27091	2.38567	2.4997	2.61297	2.72544	2.83708	2.94786	3.05774	3.16669	3.27467	3.38166	3.48762	3.59251	3.69631	3.79899	3.9005	4.00083	4.09994	4.1978	4.29438	4.38966	4.48359	4.57617	4.66734	4.7571	4.84541	4.93224
65	Anonymous participant OD 65			0	0.120212	0.240388	0.360491	0.480484	0.60033	0.719994	0.839438	0.958627	1.07752	1.19609	1.3143	1.4321	1.54947	1.66636	1.78275	1.89859	2.01386	2.12851	2.24252	2.35584	2.46844	2.5803	2.69136	2.80161	2.911	3.01951	3.12709	3.23373	3.33938	3.44401	3.54763	3.65026	3.75186	3.85242	3.95189	4.05026	4.1475	4.24357	4.33845	4.43212	4.52454	4.61569	4.70553	4.79405	4.88121
66	Anonymous participant OD 66			0	0.121742	0.243448	0.365079	0.486599	0.607971	0.729157	0.850122	0.970828	1.09124	1.21131	1.33102	1.45033	1.56919	1.68757	1.80544	1.92276	2.03949	2.1556	2.27106	2.38582	2.49986	2.61314	2.72562	2.83727	2.94805	3.05794	3.16689	3.27489	3.38188	3.48784	3.59274	3.69655	3.79923	3.90075	4.00109	4.1002	4.19807	4.29466	4.38994	4.48388	4.57646	4.66764	4.7574	4.84572	4.93255
67	Anonymous participant OD 67			0	0.122095	0.244153	0.366136	0.488008	0.609732	0.731269	0.852584	0.973639	1.0944	1.21482	1.33488	1.45453	1.57373	1.69246	1.81067	1.92833	2.0454	2.16185	2.27764	2.39273	2.5071	2.62071	2.73351	2.84548	2.95659	3.0668	3.17607	3.28437	3.39167	3.49794	3.60315	3.70726	3.81023	3.91205	4.01268	4.11208	4.21023	4.3071	4.40265	4.49687	4.58972	4.68116	4.77118	4.85975	4.94684
68	Anonymous participant OD 68			0	0.122065	0.244093	0.366047	0.487889	0.609583	0.73109	0.852376	0.973401	1.09413	1.21453	1.33455	1.45417	1.57335	1.69204	1.81023	1.92786	2.0449	2.16132	2.27708	2.39215	2.50649	2.62006	2.73284	2.84479	2.95587	3.06604	3.17529	3.28357	3.39084	3.49709	3.60227	3.70635	3.8093	3.91109	4.01169	4.11107	4.2092	4.30604	4.40158	4.49577	4.58859	4.68002	4.77002	4.85856	4.94563
69	Anonymous participant OD 69			0	0.111592	0.22315	0.334639	0.446027	0.557279	0.668657	0.780407	0.892335	1.00407	1.11504	1.22524	1.33506	1.44447	1.55345	1.66195	1.76994	1.8774	1.98428	2.09056	2.1962	2.30118	2.40545	2.50899	2.61177	2.71375	2.8149	2.9152	3.0146	3.11309	3.21064	3.3072	3.40276	3.49727	3.59073	3.68309	3.77433	3.86442	3.95333	4.04104	4.12751	4.21273	4.29667	4.3793	4.46059	4.54052
70	Anonymous participant OD 70			0	0.12197	0.243903	0.365762	0.48751	0.609109	0.730522	0.851713	0.972644	1.09328	1.21358	1.33351	1.45304	1.57212	1.69073	1.80882	1.92636	2.04331	2.15964	2.27531	2.39029	2.50454	2.61803	2.73072	2.84258	2.95357	3.06366	3.17282	3.28101	3.38821	3.49437	3.59947	3.70347	3.80634	3.90805	4.00858	4.10788	4.20593	4.3027	4.39816	4.49227	4.58503	4.67638	4.76631	4.85479	4.94178
71	Anonymous participant OD 71			0	0.121801	0.243565	0.365254	0.486833	0.608263	0.729507	0.85053	0.971293	1.09176	1.2119	1.33166	1.45102	1.56994	1.68838	1.80631	1.92368	2.04047	2.15664	2.27215	2.38697	2.50106	2.61439	2.72692	2.83863	2.94947	3.05941	3.16841	3.27646	3.3835	3.48951	3.59447	3.69832	3.80105	3.90262	4.00301	4.10217	4.20009	4.29672	4.39205	4.48603	4.57866	4.66988	4.75969	4.84804	4.93492
72	Anonymous participant OD 72			0	0.121585	0.243132	0.364606	0.485968	0.607183	0.728212	0.84902	0.969569	1.08982	1.20974	1.3288	1.44663	1.56353	1.67999	1.79666	1.91341	2.02957	2.14512	2.26002	2.37422	2.4877	2.60043	2.71236	2.82347	2.93371	3.04307	3.15149	3.25896	3.36543	3.47088	3.57527	3.67857	3.78075	3.88178	3.98163	4.08026	4.17766	4.27377	4.36859	4.46208	4.5542	4.64494	4.73427	4.82215	4.90857
73	Anonymous participant OD 73			0	0.121938	0.243839	0.365666	0.487382	0.608949	0.73033	0.851489	0.972389	1.09299	1.21326	1.33316	1.45266	1.57171	1.69028	1.80834	1.92585	2.04277	2.15907	2.27471	2.38966	2.50388	2.61734	2.73	2.84183	2.95279	3.06286	3.17199	3.28015	3.38732	3.49345	3.59852	3.70249	3.80534	3.90703	4.00752	4.1068	4.20482	4.30157	4.397	4.49109	4.58382	4.67515	4.76506	4.85351	4.94049
74	Anonymous participant OD 74			0	0.121924	0.24381	0.365622	0.487323	0.608875	0.730242	0.851386	0.972271	1.09286	1.21312	1.333	1.45248	1.57152	1.69008	1.80812	1.92562	2.04253	2.15881	2.27444	2.38937	2.50358	2.61702	2.72967	2.84149	2.95244	3.06249	3.1716	3.27976	3.38691	3.49303	3.59809	3.70205	3.80488	3.90655	4.00704	4.1063	4.20431	4.30105	4.39647	4.49055	4.58327	4.67459	4.76448	4.85292	4.93989
75	Anonymous participant OD 75			0	0.122088	0.244139	0.366115	0.48798	0.609696	0.731227	0.852535	0.973583	1.09433	1.21475	1.3348	1.45444	1.57364	1.69236	1.81056	1.92822	2.04528	2.16172	2.27751	2.3926	2.50696	2.62055	2.73335	2.84532	2.95642	3.06662	3.17588	3.28418	3.39148	3.49774	3.60294	3.70704	3.81001	3.91182	4.01244	4.11184	4.20998	4.30685	4.4024	4.49661	4.58945	4.68089	4.77091	4.85947	4.94655
76	Anonymous participant OD 76			0	0.12171	0.243383	0.364982	0.48647	0.60781	0.728964	0.849897	0.970571	1.09095	1.21099	1.33067	1.44994	1.56877	1.68712	1.80496	1.92225	2.03895	2.15503	2.27046	2.38519	2.4992	2.61245	2.7249	2.83652	2.94727	3.05713	3.16606	3.27402	3.38098	3.48692	3.59179	3.69557	3.79822	3.89972	4.00003	4.09912	4.19696	4.29352	4.38878	4.4827	4.57525	4.66641	4.75615	4.84443	4.93125
77	Anonymous participant OD 77			0	0.116072	0.232109	0.348075	0.463935	0.579653	0.695195	0.810526	0.925609	1.04041	1.1549	1.26903	1.38277	1.4961	1.60897	1.72135	1.8332	1.9445	2.0552	2.16528	2.2747	2.38343	2.49142	2.59867	2.70511	2.81074	2.91551	3.01939	3.12235	3.22436	3.32539	3.4254	3.52437	3.62227	3.71907	3.81473	3.90923	4.00254	4.09463	4.18547	4.27504	4.3633	4.45024	4.53582	4.62002	4.70281
78	Anonymous participant OD 78			0	0.121266	0.242494	0.363649	0.484693	0.605589	0.726301	0.846792	0.967025	1.08696	1.20657	1.32633	1.44655	1.56683	1.6866	1.8051	1.9224	2.03911	2.1552	2.27064	2.38538	2.4994	2.61265	2.72511	2.83674	2.9475	3.05737	3.1663	3.27427	3.38125	3.48719	3.59207	3.69586	3.79852	3.90003	4.00034	4.09944	4.19729	4.29386	4.38912	4.48305	4.57561	4.66677	4.75652	4.84481	4.93163
79	Anonymous participant OD 79			0	0.121801	0.243565	0.365254	0.486833	0.608263	0.729507	0.85053	0.971293	1.09176	1.2119	1.33166	1.45102	1.56994	1.68838	1.80631	1.92368	2.04047	2.15664	2.27215	2.38697	2.50106	2.61439	2.72692	2.83863	2.94947	3.05941	3.16841	3.27646	3.3835	3.48951	3.59447	3.69832	3.80105	3.90262	4.00301	4.10217	4.20009	4.29672	4.39205	4.48603	4.57866	4.66988	4.75969	4.84804	4.93492
80	Anonymous participant OD 80			0	0.122015	0.243993	0.365897	0.48769	0.609333	0.730792	0.852027	0.973003	1.09368	1.21403	1.33401	1.45358	1.5727	1.69135	1.80949	1.92707	2.04406	2.16044	2.27615	2.39117	2.50546	2.61899	2.73173	2.84362	2.95466	3.06479	3.17399	3.28222	3.38946	3.49566	3.60079	3.70483	3.80774	3.90949	4.01005	4.10939	4.20748	4.30428	4.39978	4.49393	4.58672	4.6781	4.76807	4.85658	4.94361
81	Anonymous participant OD 81			0	0.107228	0.215716	0.325875	0.437187	0.54821	0.658393	0.76852	0.878439	0.987971	1.09692	1.20532	1.31335	1.42099	1.52819	1.63493	1.74117	1.84688	1.95202	2.05658	2.1605	2.26377	2.36635	2.4682	2.56931	2.66963	2.77036	2.8721	2.97377	3.07416	3.17188	3.26728	3.36168	3.45506	3.54739	3.63863	3.72877	3.81777	3.90561	3.99226	4.07769	4.16188	4.24481	4.32644	4.40675	4.48572
82	Anonymous participant OD 82			0	0.107228	0.215716	0.325875	0.437187	0.54821	0.658393	0.76852	0.878439	0.987971	1.09692	1.20532	1.31335	1.42099	1.52819	1.63493	1.74117	1.84688	1.95202	2.05658	2.1605	2.26377	2.36635	2.4682	2.56931	2.66963	2.77036	2.8721	2.97377	3.07416	3.17188	3.26728	3.36168	3.45506	3.54739	3.63863	3.72877	3.81777	3.90561	3.99226	4.07769	4.16188	4.24481	4.32644	4.40675	4.48572
83	Anonymous participant OD 83			0	0.103371	0.20671	0.309986	0.413167	0.516223	0.619122	0.721832	0.824322	0.926561	1.02852	1.13065	1.23327	1.336	1.43827	1.5394	1.63943	1.73896	1.83797	1.93641	2.03426	2.13149	2.22808	2.32398	2.41918	2.51364	2.60734	2.70024	2.79231	2.88354	2.97389	3.06466	3.15647	3.24814	3.33837	3.42572	3.51058	3.59438	3.67708	3.75866	3.83909	3.91835	3.99642	4.07328	4.14889	4.22324
84	Anonymous participant OD 84			0	0.121924	0.243811	0.365624	0.487326	0.608879	0.730246	0.851391	0.972277	1.09287	1.21312	1.33301	1.45249	1.57153	1.69009	1.80814	1.92563	2.04254	2.15882	2.27445	2.38939	2.50359	2.61704	2.72969	2.8415	2.95245	3.0625	3.17162	3.27977	3.38693	3.49305	3.59811	3.70207	3.8049	3.90658	4.00706	4.10633	4.20434	4.30107	4.39649	4.49058	4.58329	4.67461	4.76451	4.85295	4.93992
85	Anonymous participant OD 85			0	0.121964	0.243891	0.365743	0.487484	0.609076	0.730483	0.851668	0.972593	1.09322	1.21352	1.33344	1.45296	1.57204	1.69064	1.80872	1.92626	2.0432	2.15952	2.27519	2.39016	2.50441	2.61789	2.73057	2.84243	2.95341	3.0635	3.17265	3.28084	3.38803	3.49418	3.59928	3.70327	3.80614	3.90785	4.00836	4.10766	4.2057	4.30247	4.39792	4.49204	4.58478	4.67613	4.76606	4.85453	4.94152
86	Anonymous participant OD 86			0	0.122067	0.244096	0.366052	0.487896	0.609591	0.7311	0.852387	0.973414	1.09414	1.21454	1.33457	1.45419	1.57337	1.69207	1.81025	1.92788	2.04493	2.16135	2.27711	2.39218	2.50652	2.6201	2.73288	2.84483	2.95591	3.06609	3.17533	3.28361	3.39089	3.49713	3.60232	3.7064	3.80935	3.91115	4.01175	4.11113	4.20926	4.3061	4.40164	4.49583	4.58865	4.68008	4.77008	4.85863	4.9457
87	Anonymous participant OD 87			0	0.121873	0.24371	0.365472	0.487122	0.608624	0.729941	0.851036	0.971871	1.09241	1.21262	1.33245	1.45189	1.57087	1.68938	1.80738	1.92483	2.04169	2.15792	2.2735	2.38839	2.50255	2.61595	2.72855	2.84032	2.95122	3.06123	3.1703	3.27841	3.38551	3.49159	3.59661	3.70052	3.80331	3.90495	4.00539	4.10461	4.20258	4.29928	4.39466	4.4887	4.58138	4.67266	4.76252	4.85093	4.93786
88	Anonymous participant OD 88			0	0.121993	0.243949	0.365831	0.487602	0.609223	0.73066	0.851873	0.972828	1.09349	1.21381	1.33377	1.45331	1.57242	1.69105	1.80916	1.92672	2.04369	2.16005	2.27574	2.39074	2.50501	2.61852	2.73123	2.84311	2.95412	3.06424	3.17342	3.28163	3.38885	3.49503	3.60014	3.70416	3.80706	3.90879	4.00933	4.10865	4.20672	4.30351	4.39898	4.49312	4.58589	4.67726	4.76721	4.8557	4.94272
[truncated: 315 more columns]

## Sheet: OD_Z
Z coordinate of the limbus mm (Right eyes)
count	Name		Angle (degree)	0	1	2	3	4	5	6	7	8	9	10	11	12	13	14	15	16	17	18	19	20	21	22	23	24	25	26	27	28	29	30	31	32	33	34	35	36	37	38	39	40	41	42	43	44	45
				ZL	ZL	ZL	ZL	ZL	ZL	ZL	ZL	ZL	ZL	ZL	ZL	ZL	ZL	ZL	ZL	ZL	ZL	ZL	ZL	ZL	ZL	ZL	ZL	ZL	ZL	ZL	ZL	ZL	ZL	ZL	ZL	ZL	ZL	ZL	ZL	ZL	ZL	ZL	ZL	ZL	ZL	ZL	ZL	ZL	ZL
1	Anonymous participant OD 1			-2.73306	-2.73427	-2.73454	-2.73425	-2.73281	-2.73261	-2.73282	-2.73187	-2.73107	-2.73004	-2.73152	-2.73399	-2.73661	-2.7394	-2.74122	-2.74235	-2.74174	-2.73797	-2.73398	-2.73023	-2.72782	-2.72676	-2.72531	-2.72304	-2.72092	-2.71855	-2.71594	-2.70924	-2.7044	-2.69851	-2.69077	-2.68154	-2.66843	-2.65326	-2.63764	-2.62184	-2.60523	-2.58946	-2.57616	-2.56436	-2.55296	-2.53991	-2.52854	-2.52089	-2.51755	-2.51524
2	Anonymous participant OD 2			-3.07872	-3.07407	-3.06989	-3.06624	-3.06367	-3.06201	-3.05912	-3.05626	-3.05462	-3.05336	-3.0522	-3.05163	-3.05203	-3.05196	-3.05151	-3.05139	-3.05181	-3.05008	-3.05056	-3.04962	-3.05019	-3.05014	-3.0513	-3.05332	-3.05535	-3.05804	-3.06013	-3.0615	-3.06259	-3.06345	-3.06433	-3.06526	-3.06474	-3.06425	NaN	NaN	NaN	NaN	NaN	NaN	NaN	NaN	NaN	NaN	NaN	NaN
3	Anonymous participant OD 3			-2.75482	-2.75525	-2.75603	-2.75751	-2.75886	-2.7598	-2.76117	-2.76179	-2.76303	-2.76411	-2.76555	-2.76832	-2.7739	-2.7804	-2.7861	-2.79018	-2.79243	-2.79442	-2.79632	-2.79913	-2.80049	-2.80181	-2.80398	-2.80483	-2.80571	-2.806	-2.80593	-2.8055	-2.80508	-2.80469	-2.80451	-2.80469	-2.80357	-2.80232	-2.80083	-2.79983	-2.79721	-2.7942	-2.79251	-2.79067	-2.78866	-2.78561	-2.78406	-2.78279	-2.78286	-2.78006
4	Anonymous participant OD 4			-2.80033	-2.80063	-2.8019	-2.8027	-2.80338	-2.80518	-2.8084	-2.81313	-2.81743	-2.82035	-2.82574	-2.8317	-2.83672	-2.8418	-2.848	-2.85233	-2.85872	-2.86355	-2.87023	-2.87463	-2.87798	-2.8816	-2.88644	-2.88923	-2.89198	-2.89291	-2.89402	-2.89482	-2.89564	-2.89698	-2.89887	-2.89962	-2.9011	-2.90221	-2.9039	-2.90547	-2.90643	-2.90813	-2.90955	-2.91127	-2.91315	-2.9159	-2.91909	-2.92234	-2.9266	-2.9302
5	Anonymous participant OD 5			-3.03369	-3.03323	-3.03183	-3.03051	-3.03046	-3.03034	-3.03037	-3.03014	-3.03042	-3.03098	-3.03196	-3.03351	-3.03603	-3.03795	-3.03997	-3.04115	-3.04393	-3.04733	-3.05122	-3.05484	-3.05926	-3.06297	-3.06722	-3.07084	-3.07534	-3.0792	-3.08317	-3.087	-3.09142	-3.09519	-3.09767	-3.09935	-3.10274	-3.10731	-3.11162	-3.11586	-3.11838	-3.12024	-3.12206	-3.12373	-3.1249	-3.12678	-3.12744	-3.12858	-3.12936	-3.12988
6	Anonymous participant OD 6			-3.14387	-3.14118	-3.13929	-3.13741	-3.13548	-3.1329	-3.13207	-3.13001	-3.12786	-3.12713	-3.1263	-3.12382	-3.1183	-3.11204	-3.10751	-3.10573	-3.10629	-3.10604	-3.10581	-3.1054	-3.10481	-3.10362	-3.10324	-3.10225	-3.10171	-3.10094	-3.09898	-3.09724	-3.09589	-3.09447	-3.09232	-3.09023	-3.08835	-3.08634	-3.08535	-3.08403	-3.08251	-3.0809	-3.07943	-3.07948	-3.07966	-3.07955	-3.07818	-3.07709	-3.07614	-3.07575
7	Anonymous participant OD 7			-2.95301	-2.95143	-2.94885	-2.94747	-2.94552	-2.94455	-2.9431	-2.94257	-2.94139	-2.94106	-2.94098	-2.93983	-2.93962	-2.93867	-2.9371	-2.93488	-2.93183	-2.92819	-2.92233	-2.91758	-2.91076	-2.9028	-2.89502	-2.88607	-2.87716	-2.86774	-2.85675	-2.8467	-2.83572	-2.82268	-2.80857	-2.79254	-2.77879	-2.76418	-2.7478	-2.73011	-2.71299	-2.69804	-2.68451	-2.66691	-2.65281	-2.63886	-2.62277	-2.60743	-2.594	-2.58353
8	Anonymous participant OD 8			-2.73613	-2.73818	-2.74059	-2.74484	-2.74793	-2.75117	-2.75365	-2.75778	-2.75962	-2.7624	-2.76401	-2.76507	-2.76677	-2.7675	-2.76815	-2.76794	-2.76735	-2.76722	-2.76694	-2.76616	-2.76619	-2.76529	-2.76363	-2.76085	-2.75803	-2.7555	-2.75299	-2.74967	-2.7475	-2.74449	-2.74174	-2.74	-2.73772	-2.7343	-2.73139	-2.7299	-2.72832	-2.7267	-2.72487	-2.72438	-2.7223	-2.72014	-2.71884	-2.71825	-2.71735	-2.71674
9	Anonymous participant OD 9			-3.31148	-3.31058	-3.31045	-3.30983	-3.30927	-3.30773	-3.30613	-3.305	-3.30358	-3.30217	-3.30073	-3.29934	-3.2985	-3.29699	-3.29516	-3.29305	-3.29155	-3.28825	-3.2858	-3.28239	-3.27897	-3.27508	-3.27034	-3.26587	-3.26176	-3.25736	-3.2535	-3.24908	-3.24429	-3.24016	-3.23574	-3.23101	-3.22618	-3.22177	-3.2171	-3.21146	-3.20789	-3.20648	-3.20597	-3.2048	-3.20039	-3.19298	-3.18669	-3.18155	-3.17596	-3.17061
10	Anonymous participant OD 10			-2.66102	-2.66883	-2.67787	-2.68663	-2.69735	-2.70924	-2.72047	-2.73204	-2.74543	-2.75759	-2.77129	-2.78468	-2.79802	-2.80622	-2.81843	-2.82785	-2.83711	-2.84511	-2.85358	-2.85989	-2.86685	-2.87217	-2.87691	-2.88115	-2.88504	-2.88792	-2.89011	-2.89184	-2.89341	-2.89439	-2.89619	-2.89699	-2.89795	-2.89904	-2.90025	-2.90113	-2.90208	-2.90361	-2.90476	-2.90618	-2.90783	-2.91006	-2.91146	-2.91483	-2.91843	-2.92203
11	Anonymous participant OD 11			-2.62676	-2.62263	-2.61965	-2.61846	-2.61756	-2.61675	-2.61585	-2.61501	-2.61571	-2.61638	-2.6177	-2.62167	-2.62665	-2.63111	-2.63683	-2.64337	-2.65026	-2.66042	-2.67003	-2.67954	-2.68806	-2.69423	-2.70056	-2.70963	-2.71774	-2.72653	-2.73394	-2.74166	-2.74885	-2.75634	-2.76366	-2.77398	-2.78208	-2.79087	-2.79872	-2.80828	NaN	NaN	NaN	NaN	NaN	NaN	NaN	NaN	NaN	NaN
12	Anonymous participant OD 12			NaN	NaN	NaN	NaN	NaN	NaN	NaN	NaN	NaN	NaN	NaN	NaN	NaN	NaN	NaN	NaN	NaN	NaN	NaN	NaN	NaN	NaN	NaN	NaN	NaN	NaN	NaN	NaN	NaN	NaN	NaN	NaN	NaN	NaN	NaN	NaN	NaN	NaN	NaN	NaN	NaN	NaN	NaN	NaN	NaN	NaN
13	Anonymous participant OD 13			-3.05411	-3.05448	-3.05497	-3.05585	-3.05888	-3.06163	-3.06483	-3.06775	-3.07162	-3.07416	-3.07753	-3.08042	-3.08392	-3.08653	-3.08921	-3.09149	-3.09492	-3.09744	-3.10109	-3.10367	-3.1085	-3.11201	-3.11687	-3.12125	-3.1252	-3.12879	-3.13237	-3.13648	-3.13981	-3.14301	-3.14682	-3.14953	-3.15316	-3.15672	-3.1598	-3.16311	-3.16495	-3.16693	-3.16818	-3.16982	-3.17085	-3.17175	-3.17207	-3.17189	-3.17064	-3.16895
14	Anonymous participant OD 14			-2.73207	-2.73105	-2.7292	-2.72886	-2.72703	-2.72604	-2.72536	-2.72355	-2.72185	-2.7204	-2.71938	-2.71799	-2.71624	-2.71461	-2.71375	-2.71283	-2.7125	-2.71174	-2.71095	-2.71052	-2.70882	-2.70735	-2.70293	-2.69825	-2.694	-2.69289	-2.69354	-2.69356	-2.69385	-2.69479	-2.69519	-2.69598	-2.6959	-2.69529	-2.69446	-2.69524	-2.69566	-2.69577	-2.69559	-2.69539	-2.6954	-2.69643	-2.69596	-2.69621	-2.69498	-2.69466
15	Anonymous participant OD 15			-2.12795	-2.13267	-2.14137	-2.15148	-2.16057	-2.16683	-2.17095	-2.1755	-2.17933	-2.18418	-2.18996	-2.19802	-2.2085	-2.22021	-2.2311	-2.2394	-2.24569	-2.25141	-2.25753	-2.26337	-2.26969	-2.27663	-2.28564	-2.2954	-2.30524	-2.31323	-2.32296	-2.3343	-2.34623	-2.35621	-2.36353	-2.36929	-2.37473	-2.3796	-2.38459	-2.38839	-2.39257	-2.39651	-2.40063	-2.40537	-2.41005	-2.41656	-2.42606	-2.43602	-2.44509	-2.45138
16	Anonymous participant OD 16			-2.75275	-2.75691	-2.76033	-2.76481	-2.76918	-2.77358	-2.77871	-2.78452	-2.79071	-2.79831	-2.80513	-2.81284	-2.82069	-2.82769	-2.83579	-2.84375	-2.85151	-2.86012	-2.86925	-2.87873	-2.88748	-2.89728	-2.90748	-2.91796	-2.9274	-2.93675	-2.94623	-2.9558	-2.96554	-2.97456	-2.98398	-2.99279	-3.00153	-3.01036	-3.01867	-3.02745	-3.03607	-3.04454	-3.05346	-3.06214	-3.07118	-3.08029	-3.08944	-3.09922	-3.10813	-3.11789
17	Anonymous participant OD 17			-3.04174	-3.04186	-3.042	-3.0422	-3.04221	-3.04272	-3.04346	-3.04623	-3.04737	-3.04978	-3.05086	-3.05423	-3.05855	-3.0618	-3.06497	-3.06774	-3.07103	-3.07492	-3.07859	-3.08146	-3.08608	-3.0901	-3.09429	-3.09844	-3.10228	-3.10631	-3.10998	-3.11471	-3.11819	-3.12192	-3.12533	-3.12871	-3.13213	-3.1346	-3.13636	-3.13803	-3.13986	-3.14072	-3.14109	-3.1412	-3.14043	-3.13926	-3.13796	-3.13654	-3.13467	-3.13323
18	Anonymous participant OD 18			-2.93587	-2.93885	-2.94002	-2.94105	-2.94193	-2.94265	-2.94351	-2.9444	-2.94632	-2.94765	-2.94961	-2.95188	-2.95302	-2.95309	-2.95331	-2.95322	-2.95361	-2.95345	-2.95415	-2.95461	-2.95614	-2.95732	-2.95954	-2.96288	-2.96737	-2.97005	-2.97313	-2.97666	-2.97983	-2.98365	-2.98718	-2.99146	-2.99385	-2.99842	-3.00446	-3.0077	-3.01066	-3.01381	-3.01861	-3.02476	-3.02959	-3.03196	-3.03401	-3.0366	-3.03903	-3.04183
19	Anonymous participant OD 19			-2.60136	-2.60437	-2.60656	-2.61011	-2.61391	-2.6184	-2.6247	-2.63429	-2.64476	-2.65432	-2.66127	-2.66624	-2.67101	-2.6763	-2.6813	-2.68615	-2.69064	-2.69599	-2.70068	-2.70534	-2.70946	-2.71292	-2.71683	-2.72124	-2.72609	-2.7305	-2.73532	-2.73998	-2.74438	-2.74888	-2.75309	-2.75746	-2.76107	-2.76477	-2.76661	-2.76898	-2.77141	-2.77235	-2.77374	-2.77452	-2.77469	-2.77439	-2.77442	-2.77429	-2.77292	-2.77267
20	Anonymous participant OD 20			-2.98536	-2.98516	-2.98489	-2.98439	-2.98333	-2.98312	-2.98324	-2.98322	-2.98295	-2.98395	-2.98433	-2.98586	-2.98665	-2.98697	-2.98744	-2.98825	-2.98985	-2.99072	-2.9923	-2.99413	-2.99697	-2.99864	-2.99981	-3.00104	-3.00311	-3.00444	-3.00731	-3.00951	-3.01128	-3.01533	-3.02015	-3.0228	-3.02439	-3.02632	-3.02844	-3.03004	-3.03176	-3.03305	-3.03445	-3.03628	-3.03776	-3.03992	-3.04214	-3.04396	-3.04573	-3.04818
21	Anonymous participant OD 21			-3.3471	-3.35983	-3.36999	-3.37657	-3.38586	-3.38988	-3.38041	-3.37933	-3.36422	-3.35529	-3.33484	-3.31467	-3.29196	-3.26592	-3.24954	-3.21344	-3.18193	-3.14782	-3.11301	-3.07594	-3.06019	-3.06295	-3.06598	-3.0683	-3.0706	-3.07398	-3.0755	-3.07609	-3.07629	-3.07795	-3.08172	-3.08271	-3.08448	-3.0849	-3.08661	-3.08727	-3.08858	-3.0889	-3.08784	-3.08769	-3.08745	-3.0888	-3.08946	-3.09072	-3.09207	-3.09359
22	Anonymous participant OD 22			-3.11621	-3.12158	-3.12791	-3.13719	-3.14151	-3.14509	-3.14934	-3.15522	-3.16075	-3.16275	-3.16404	-3.16432	-3.16092	-3.1569	-3.15304	-3.1513	-3.14763	-3.14558	-3.14492	-3.14503	-3.14479	-3.14628	-3.14713	-3.14706	-3.14659	-3.14648	-3.14506	-3.14254	-3.13821	-3.13527	-3.13092	-3.12808	-3.12494	-3.12188	-3.11745	-3.11204	-3.10935	-3.10737	-3.1028	-3.10019	-3.09393	-3.08871	-3.08409	-3.07736	-3.07277	-3.0686
23	Anonymous participant OD 23			-2.56899	-2.56895	-2.56921	-2.56929	-2.57	-2.57107	-2.57341	-2.57798	-2.58353	-2.589	-2.59275	-2.59525	-2.59773	-2.6001	-2.60135	-2.60257	-2.60313	-2.60386	-2.60439	-2.60472	-2.60553	-2.60608	-2.60667	-2.60768	-2.60988	-2.61238	-2.61573	-2.61894	-2.62048	-2.62166	-2.62369	-2.6266	-2.62776	-2.62907	-2.63194	-2.63433	-2.63781	-2.64269	-2.64851	-2.6532	-2.65602	-2.657	-2.65826	-2.65932	-2.66077	-2.66181
24	Anonymous participant OD 24			-2.58014	-2.58212	-2.58393	-2.586	-2.58855	-2.59101	-2.59211	-2.59463	-2.59572	-2.59686	-2.59727	-2.59857	-2.59925	-2.59999	-2.60034	-2.60091	-2.60292	-2.60312	-2.60322	-2.60395	-2.60435	-2.60524	-2.60632	-2.60661	-2.60756	-2.60777	-2.60816	-2.6086	-2.60912	-2.60999	-2.61123	-2.61186	-2.61291	-2.61379	-2.61498	-2.61618	-2.61729	-2.61994	-2.6231	-2.62493	-2.62693	-2.62914	-2.63104	-2.63314	-2.63604	-2.63861
25	Anonymous participant OD 25			-2.51772	-2.51447	-2.51182	-2.50909	-2.50625	-2.50414	-2.50245	-2.50014	-2.49868	-2.49763	-2.49619	-2.49572	-2.49503	-2.49411	-2.49375	-2.49291	-2.49101	-2.48732	-2.48305	-2.48017	-2.48024	-2.48167	-2.48376	-2.48592	-2.48876	-2.49146	-2.49374	-2.49663	-2.49906	-2.50144	-2.50439	-2.50691	-2.50936	-2.51171	-2.5142	-2.51504	-2.51644	-2.51816	-2.51853	-2.51912	-2.51958	-2.51978	-2.51964	-2.51971	-2.5186	-2.518
26	Anonymous participant OD 26			-3.145	-3.14791	-3.14969	-3.15235	-3.15577	-3.15714	-3.15872	-3.1594	-3.16098	-3.16357	-3.16624	-3.1694	-3.17237	-3.17443	-3.17568	-3.1764	-3.17786	-3.17763	-3.17784	-3.17669	-3.17612	-3.17482	-3.17472	-3.17442	-3.17489	-3.17355	-3.17457	-3.17518	-3.17608	-3.17653	-3.17721	-3.17708	-3.17756	-3.17692	-3.17672	-3.17548	-3.17497	-3.1754	-3.17472	-3.17518	-3.17557	-3.17616	-3.17521	-3.1753	-3.17595	-3.17657
27	Anonymous participant OD 27			-2.84285	-2.84286	-2.84229	-2.84144	-2.8399	-2.83923	-2.83696	-2.83512	-2.83262	-2.82918	-2.82456	-2.819	-2.81174	-2.80223	-2.79221	-2.7797	-2.76563	-2.74903	-2.73041	-2.71111	-2.69049	-2.67298	-2.65217	-2.63502	-2.61683	-2.6021	-2.59017	NaN	NaN	NaN	NaN	NaN	NaN	NaN	NaN	NaN	NaN	NaN	NaN	NaN	NaN	NaN	NaN	NaN	NaN	NaN
28	Anonymous participant OD 28			-2.39909	-2.39821	-2.39784	-2.39793	-2.39723	-2.39657	-2.39532	-2.39358	-2.39205	-2.3901	-2.38861	-2.38561	-2.38424	-2.38152	-2.37931	-2.37729	-2.37574	-2.37313	-2.37159	-2.36954	-2.36844	-2.36628	-2.36421	-2.36335	-2.36111	-2.36013	-2.35896	-2.35853	-2.35745	-2.35605	-2.35493	-2.35295	-2.34828	-2.34325	-2.33828	-2.33615	-2.33579	-2.33567	-2.3349	-2.33406	-2.33293	-2.33253	-2.33154	-2.33114	-2.33002	-2.32885
29	Anonymous participant OD 29			-2.64817	-2.64449	-2.64244	-2.64088	-2.63968	-2.63751	-2.63506	-2.63364	-2.63347	-2.63332	-2.63324	-2.6334	-2.63399	-2.63379	-2.63426	-2.63446	-2.63506	-2.63467	-2.63467	-2.63439	-2.6349	-2.63493	-2.63431	-2.63381	-2.6329	-2.6319	-2.63089	-2.62987	-2.62946	-2.62902	-2.62964	-2.62982	-2.62937	-2.63022	-2.62926	-2.62963	-2.62962	-2.62877	-2.62884	-2.62917	-2.62909	-2.62941	-2.62891	-2.62936	-2.63078	-2.63184
30	Anonymous participant OD 30			-3.01094	-3.00927	-3.00419	-3.00083	-2.99773	-2.9918	-2.98746	-2.98114	-2.9759	-2.96811	-2.95959	-2.94776	-2.93746	-2.92497	-2.91217	-2.89663	-2.88015	-2.86339	-2.84757	-2.8337	-2.8205	-2.80685	-2.79707	-2.79313	-2.79211	-2.79235	-2.79672	NaN	NaN	NaN	NaN	NaN	NaN	NaN	NaN	NaN	NaN	NaN	NaN	NaN	NaN	NaN	NaN	NaN	NaN	NaN
31	Anonymous participant OD 31			-2.68724	-2.68628	-2.68536	-2.68536	-2.68508	-2.68488	-2.68428	-2.68352	-2.68344	-2.68316	-2.68304	-2.68329	-2.68399	-2.68457	-2.68603	-2.68733	-2.68907	-2.6898	-2.69155	-2.69247	-2.69376	-2.69629	-2.69729	-2.69902	-2.70038	-2.70194	-2.70504	-2.70808	-2.70964	-2.71173	-2.71378	-2.71501	-2.71615	-2.71792	-2.71863	-2.72024	-2.72077	-2.72193	-2.72347	-2.72419	-2.72526	-2.72671	-2.72699	-2.72824	-2.72977	-2.7301
32	Anonymous participant OD 32			-2.51772	-2.51447	-2.51182	-2.50909	-2.50625	-2.50414	-2.50245	-2.50014	-2.49868	-2.49763	-2.49619	-2.49572	-2.49503	-2.49411	-2.49375	-2.49291	-2.49101	-2.48732	-2.48305	-2.48017	-2.48024	-2.48167	-2.48376	-2.48592	-2.48876	-2.49146	-2.49374	-2.49663	-2.49906	-2.50144	-2.50439	-2.50691	-2.50936	-2.51171	-2.5142	-2.51504	-2.51644	-2.51816	-2.51853	-2.51912	-2.51958	-2.51978	-2.51964	-2.51971	-2.5186	-2.518
33	Anonymous participant OD 33			-2.86099	-2.86407	-2.86624	-2.86813	-2.87122	-2.87335	-2.87559	-2.87685	-2.87851	-2.87967	-2.88106	-2.88195	-2.88328	-2.8822	-2.88163	-2.88018	-2.87961	-2.87529	-2.86962	-2.8619	-2.85305	-2.8412	-2.82938	-2.81672	-2.80452	-2.80255	-2.81418	-2.82537	-2.83655	-2.84957	-2.82706	-2.80452	-2.78206	-2.75978	-2.73779	-2.71621	-2.69511	-2.67457	-2.65465	-2.63539	-2.61683	-2.59897	-2.5818	-2.56525	-2.54922	-2.53353
34	Anonymous participant OD 34			-2.25794	-2.25925	-2.26116	-2.26295	-2.26434	-2.26722	-2.2688	-2.27086	-2.27345	-2.27619	-2.27772	-2.27961	-2.28135	-2.28218	-2.28369	-2.28462	-2.28548	-2.28763	-2.2888	-2.29047	-2.2927	-2.29542	-2.2984	-2.30107	-2.30362	-2.30654	-2.3088	-2.31168	-2.31424	-2.3162	-2.31739	-2.32079	-2.32626	-2.33346	-2.3386	-2.3414	-2.34329	-2.34415	-2.34541	-2.34613	-2.34667	-2.34636	-2.34684	-2.34828	-2.34875	-2.34961
35	Anonymous participant OD 35			-2.97406	-2.97184	-2.9699	-2.96878	-2.96771	-2.96789	-2.96874	-2.97015	-2.97277	-2.97417	-2.97509	-2.97649	-2.97805	-2.97913	-2.97997	-2.98144	-2.98213	-2.98241	-2.98281	-2.98336	-2.98448	-2.98321	-2.97902	-2.97364	-2.96847	-2.96413	-2.96029	-2.95622	-2.95198	-2.94868	-2.9462	-2.9442	-2.94318	-2.9424	-2.94174	-2.94094	-2.9403	-2.9402	-2.93978	-2.93966	-2.93898	-2.94006	-2.9416	-2.94534	-2.94983	-2.95498
36	Anonymous participant OD 36			-2.97406	-2.97184	-2.9699	-2.96878	-2.96771	-2.96789	-2.96874	-2.97015	-2.97277	-2.97417	-2.97509	-2.97649	-2.97805	-2.97913	-2.97997	-2.98144	-2.98213	-2.98241	-2.98281	-2.98336	-2.98448	-2.98321	-2.97902	-2.97364	-2.96847	-2.96413	-2.96029	-2.95622	-2.95198	-2.94868	-2.9462	-2.9442	-2.94318	-2.9424	-2.94174	-2.94094	-2.9403	-2.9402	-2.93978	-2.93966	-2.93898	-2.94006	-2.9416	-2.94534	-2.94983	-2.95498
37	Anonymous participant OD 37			-3.05791	-3.05607	-3.05384	-3.05233	-3.05193	-3.05163	-3.05111	-3.04987	-3.04907	-3.04587	-3.04224	-3.03879	-3.03769	-3.03596	-3.03332	-3.02906	-3.027	-3.02406	-3.02199	-3.01755	-3.01399	-3.01104	-3.00701	-3.00257	-3.00042	-2.99682	-2.99349	-2.99058	-2.98671	-2.98268	-2.97757	-2.9738	-2.96987	-2.967	-2.96333	-2.95948	-2.95513	-2.9519	-2.94901	-2.94653	-2.94291	-2.94089	-2.9373	-2.93492	-2.93152	-2.92786
38	Anonymous participant OD 38			-1.93915	-1.93828	-1.93779	-1.9364	-1.9352	-1.93368	-1.93164	-1.92923	-1.9264	-1.92358	-1.92041	-1.91848	-1.91825	-1.91912	-1.9202	-1.92104	-1.9203	-1.92036	-1.92046	-1.92125	-1.922	-1.92257	-1.92333	-1.92407	-1.92495	-1.92581	-1.92739	-1.92984	-1.9327	-1.936	-1.93897	-1.94382	-1.94967	-1.95648	-1.96148	-1.96477	-1.96717	-1.96884	-1.97103	-1.97324	-1.97598	-1.98002	-1.98683	-1.99513	-2.00155	-2.0063
39	Anonymous participant OD 39			-2.95588	-2.95737	-2.95984	-2.9631	-2.96616	-2.96878	-2.97149	-2.97372	-2.97732	-2.98057	-2.98245	-2.98443	-2.98616	-2.98699	-2.98943	-2.99272	-2.99583	-2.99754	-2.99943	-3.00037	-3.00176	-3.00288	-3.00365	-3.00463	-3.0055	-3.00609	-3.00718	-3.00791	-3.00846	-3.00862	-3.00923	-3.01011	-3.00974	-3.0107	-3.01029	-3.0098	-3.00961	-3.00922	-3.00908	-3.00769	-3.00659	-3.00533	-3.00369	-3.0034	-3.00306	-3.00246
40	Anonymous participant OD 40			-2.29249	-2.29148	-2.29004	-2.28819	-2.28652	-2.28603	-2.28309	-2.28211	-2.28098	-2.27951	-2.27851	-2.27755	-2.27654	-2.27494	-2.27391	-2.27245	-2.27083	-2.26986	-2.26686	-2.26605	-2.26551	-2.26603	-2.26666	-2.2679	-2.26948	-2.27253	-2.27502	-2.27779	-2.28084	-2.28406	-2.28648	-2.28856	-2.29182	-2.29516	-2.29837	-2.30275	-2.3071	-2.3117	-2.31672	-2.3208	-2.32612	-2.33059	-2.33534	-2.34066	-2.34605	-2.35084
41	Anonymous participant OD 41			-2.38123	-2.38048	-2.37804	-2.3757	-2.37547	-2.37426	-2.36989	-2.36502	-2.35932	-2.35511	-2.35322	-2.35282	-2.35297	-2.35287	-2.35278	-2.35286	-2.35355	-2.35404	-2.35483	-2.3557	-2.35655	-2.35643	-2.35498	-2.3551	-2.35516	-2.35625	-2.35753	-2.35822	-2.3587	-2.35966	-2.36049	-2.36125	-2.36226	-2.36292	-2.36416	-2.3653	-2.36634	-2.3676	-2.36849	-2.36952	-2.37047	-2.37074	-2.36905	-2.36664	-2.36493	-2.3675
42	Anonymous participant OD 42			-3.08491	-3.08538	-3.08539	-3.08515	-3.08615	-3.08873	-3.09189	-3.09385	-3.09839	-3.10189	-3.10482	-3.10924	-3.11341	-3.11926	-3.12493	-3.13048	-3.13687	-3.14287	-3.15066	-3.15601	-3.16364	-3.17051	-3.17696	-3.18358	-3.18793	-3.19522	-3.20075	-3.20598	-3.21304	-3.21814	-3.22509	-3.23033	-3.236	-3.24263	-3.24821	-3.25425	-3.25937	-3.26574	-3.27229	-3.27838	-3.28574	-3.29179	-3.29719	-3.30301	-3.30798	-3.31148
43	Anonymous participant OD 43			-2.81116	-2.80926	-2.80811	-2.8066	-2.80521	-2.80355	-2.80171	-2.80039	-2.79885	-2.79764	-2.79772	-2.79784	-2.79824	-2.79845	-2.7987	-2.79908	-2.80046	-2.80048	-2.80357	-2.80523	-2.80632	-2.8069	-2.80786	-2.80805	-2.809	-2.80866	-2.80856	-2.80901	-2.80962	-2.81034	-2.81148	-2.81138	-2.812	-2.8119	-2.81076	-2.80835	-2.80488	-2.80276	-2.80097	-2.79849	-2.7938	-2.79056	-2.78768	-2.78466	-2.78214	-2.77762
44	Anonymous participant OD 44			-3.11873	-3.11484	-3.10957	-3.10351	-3.09748	-3.09177	-3.08567	-3.07931	-3.07356	-3.06805	-3.06364	-3.05802	-3.0535	-3.04786	-3.04333	-3.03617	-3.03111	-3.02783	-3.02362	-3.01598	-3.00972	-3.00691	-3.00298	-2.99474	-2.9884	-2.98423	-2.97807	-2.96996	-2.96347	-2.95872	-2.95078	-2.94419	-2.93868	-2.93239	-2.92468	-2.92104	-2.91689	-2.91187	-2.90735	-2.90289	-2.8979	-2.89411	-2.88763	-2.88339	-2.88007	-2.87677
45	Anonymous participant OD 45			-3.11873	-3.11484	-3.10957	-3.10351	-3.09748	-3.09177	-3.08567	-3.07931	-3.07356	-3.06805	-3.06364	-3.05802	-3.0535	-3.04786	-3.04333	-3.03617	-3.03111	-3.02783	-3.02362	-3.01598	-3.00972	-3.00691	-3.00298	-2.99474	-2.9884	-2.98423	-2.97807	-2.96996	-2.96347	-2.95872	-2.95078	-2.94419	-2.93868	-2.93239	-2.92468	-2.92104	-2.91689	-2.91187	-2.90735	-2.90289	-2.8979	-2.89411	-2.88763	-2.88339	-2.88007	-2.87677
46	Anonymous participant OD 46			-2.97288	-2.97282	-2.97222	-2.97215	-2.97252	-2.97328	-2.97395	-2.97434	-2.97536	-2.97738	-2.97979	-2.98349	-2.98749	-2.98963	-2.99285	-2.99624	-3.0011	-3.00477	-3.00936	-3.01343	-3.01821	-3.02282	-3.02683	-3.03009	-3.03404	-3.03776	-3.0423	-3.04614	-3.04978	-3.05293	-3.05703	-3.06128	-3.06481	-3.0681	-3.07075	-3.07329	-3.07717	-3.08157	-3.08389	-3.08564	-3.08709	-3.08881	-3.08957	-3.09045	-3.09112	-3.09091
47	Anonymous participant OD 47			-3.38151	-3.37567	-3.37141	-3.36821	-3.36486	-3.36164	-3.36105	-3.36361	-3.36596	-3.36834	-3.36632	-3.36273	-3.35911	-3.35441	-3.35113	-3.34751	-3.34324	-3.33841	-3.33402	-3.3291	-3.32508	-3.32029	-3.31652	-3.31323	-3.31021	-3.3072	-3.30507	-3.30758	-3.30886	-3.31049	-3.30974	-3.3066	-3.30437	-3.30148	-3.29925	-3.29594	-3.29302	-3.29041	-3.28789	-3.28475	-3.28224	-3.27995	-3.27753	-3.27532	-3.27308	-3.27074
48	Anonymous participant OD 48			-3.05688	-3.05851	-3.05984	-3.06069	-3.06218	-3.06328	-3.06398	-3.06577	-3.06697	-3.06895	-3.06997	-3.07157	-3.07292	-3.07444	-3.07535	-3.07775	-3.0806	-3.08127	-3.08334	-3.08565	-3.08691	-3.08849	-3.09005	-3.09016	-3.09123	-3.09109	-3.09092	-3.08969	-3.08769	-3.08656	-3.08513	-3.08256	-3.07989	-3.07696	-3.0746	-3.07117	-3.06709	-3.06371	-3.05968	-3.0565	-3.05257	-3.04942	-3.04638	-3.04396	-3.04139	-3.03848
49	Anonymous participant OD 49			-2.9948	-2.99694	-2.99827	-2.9997	-3.00264	-3.00522	-3.00773	-3.00942	-3.01232	-3.01555	-3.01722	-3.0196	-3.02311	-3.02516	-3.02885	-3.0316	-3.03502	-3.03727	-3.0412	-3.04402	-3.04677	-3.04916	-3.05326	-3.05725	-3.06024	-3.06193	-3.06529	-3.06879	-3.0715	-3.07339	-3.07627	-3.07901	-3.08193	-3.08475	-3.0883	-3.09129	-3.09421	-3.09701	-3.09932	-3.10201	-3.10502	-3.10759	-3.11023	-3.11179	-3.11364	-3.11543
50	Anonymous participant OD 50			-3.08297	-3.08427	-3.08602	-3.0879	-3.09052	-3.09328	-3.09565	-3.0989	-3.10216	-3.10603	-3.10994	-3.1146	-3.11835	-3.12206	-3.12497	-3.12889	-3.13305	-3.13634	-3.1393	-3.14222	-3.14642	-3.1513	-3.15775	-3.16443	-3.17058	-3.17304	-3.17316	-3.17316	-3.17254	-3.17175	-3.17003	-3.16715	-3.165	-3.16232	-3.16017	-3.15767	-3.15553	-3.1519	-3.14975	-3.14686	-3.14446	-3.14488	-3.14704	-3.15146	-3.15487	-3.15571
51	Anonymous participant OD 51			-3.00905	-3.01545	-3.02082	-3.02736	-3.03223	-3.03754	-3.04213	-3.04657	-3.04983	-3.05281	-3.05534	-3.05808	-3.06368	-3.06863	-3.07351	-3.07565	-3.07575	-3.07747	-3.0794	-3.08243	-3.08611	-3.0894	-3.09171	-3.09444	-3.09623	-3.09728	-3.09838	-3.09982	-3.10062	-3.10125	-3.10139	-3.10204	-3.10271	-3.10332	-3.10431	-3.10549	-3.10686	-3.10921	-3.1103	-3.11163	-3.11204	-3.11277	-3.11342	-3.11377	-3.11479	-3.11563
52	Anonymous participant OD 52			-2.29249	-2.29148	-2.29004	-2.28819	-2.28652	-2.28603	-2.28309	-2.28211	-2.28098	-2.27951	-2.27851	-2.27755	-2.27654	-2.27494	-2.27391	-2.27245	-2.27083	-2.26986	-2.26686	-2.26605	-2.26551	-2.26603	-2.26666	-2.2679	-2.26948	-2.27253	-2.27502	-2.27779	-2.28084	-2.28406	-2.28648	-2.28856	-2.29182	-2.29516	-2.29837	-2.30275	-2.3071	-2.3117	-2.31672	-2.3208	-2.32612	-2.33059	-2.33534	-2.34066	-2.34605	-2.35084
53	Anonymous participant OD 53			-3.48383	-3.4864	-3.49109	-3.49492	-3.49874	-3.50226	-3.50658	-3.51069	-3.51507	-3.51932	-3.52346	-3.52825	-3.53077	-3.53289	-3.53407	-3.53502	-3.5356	-3.53663	-3.53673	-3.53751	-3.5387	-3.53886	-3.53875	-3.5386	-3.53904	-3.54195	-3.54612	-3.54996	-3.5547	-3.56002	-3.56467	-3.56816	-3.57247	-3.57778	-3.58435	-3.59026	-3.59584	-3.60131	-3.60859	-3.61723	-3.62599	-3.63422	-3.64122	-3.64641	-3.64952	-3.65178
54	Anonymous participant OD 54			-3.03958	-3.03692	-3.03367	-3.03004	-3.02639	-3.02428	-3.02318	-3.02246	-3.0222	-3.02245	-3.02275	-3.02364	-3.0254	-3.02664	-3.02932	-3.03302	-3.03777	-3.04082	-3.04463	-3.04799	-3.05214	-3.05722	-3.06289	-3.07112	-3.07977	-3.08686	-3.09332	-3.10105	NaN	NaN	NaN	NaN	NaN	NaN	NaN	NaN	NaN	NaN	NaN	NaN	NaN	NaN	NaN	NaN	NaN	NaN
55	Anonymous participant OD 55			-3.01479	-3.01514	-3.01576	-3.01718	-3.01957	-3.02058	-3.02283	-3.02739	-3.03098	-3.03433	-3.03872	-3.04542	-3.05056	-3.05703	-3.06354	-3.06995	-3.07761	-3.08306	-3.08791	-3.09389	-3.10124	-3.10622	-3.11212	-3.11804	-3.12393	-3.12851	-3.133	-3.13692	-3.14081	-3.14296	-3.14586	-3.14754	-3.15021	-3.1524	-3.15431	-3.15579	-3.15677	-3.15778	-3.15668	-3.15748	-3.15827	-3.15976	-3.15928	-3.15985	-3.1598	-3.16013
56	Anonymous participant OD 56			-2.37897	-2.38171	-2.38448	-2.38779	-2.39123	-2.39466	-2.39824	-2.40207	-2.40574	-2.40938	-2.41332	-2.41727	-2.42079	-2.42388	-2.42705	-2.42981	-2.43207	-2.43492	-2.4382	-2.44155	-2.44478	-2.44755	-2.45113	-2.45428	-2.45766	-2.46112	-2.46427	-2.46716	-2.47008	-2.47264	-2.47497	-2.477	-2.47897	-2.48067	-2.48218	-2.48349	-2.48451	-2.48528	-2.48618	-2.48675	-2.48725	-2.48741	-2.48795	-2.48765	-2.48784	-2.48806
57	Anonymous participant OD 57			-3.0037	-3.00179	-2.99904	-2.99563	-2.99301	-2.99045	-2.98918	-2.98844	-2.98618	-2.98481	-2.9828	-2.98053	-2.97784	-2.97473	-2.97236	-2.97094	-2.96975	-2.96712	-2.96552	-2.96493	-2.96396	-2.96275	-2.96146	-2.95903	-2.95729	-2.95566	-2.95498	-2.95431	-2.95444	-2.95462	-2.95509	-2.95505	-2.95423	-2.94998	-2.94522	-2.94199	-2.94222	-2.94272	-2.94222	-2.93954	-2.93689	-2.93611	-2.93413	-2.93307	-2.93007	-2.92772
58	Anonymous participant OD 58			-2.83565	-2.83326	-2.82921	-2.82417	-2.82023	-2.82082	-2.82219	-2.82487	-2.82591	-2.82729	-2.82673	-2.82578	-2.8241	-2.82186	-2.82064	-2.81988	-2.81811	-2.81589	-2.81388	-2.81163	-2.8097	-2.80781	-2.80537	-2.80263	-2.80052	-2.79903	-2.7983	-2.79732	-2.79517	-2.79427	-2.79433	-2.79292	-2.78875	-2.78423	-2.77981	-2.77791	-2.77527	-2.77377	-2.7716	-2.76711	-2.76467	-2.76142	-2.75593	-2.75366	-2.75045	-2.74419
59	Anonymous participant OD 59			-2.37897	-2.38171	-2.38448	-2.38779	-2.39123	-2.39466	-2.39824	-2.40207	-2.40574	-2.40938	-2.41332	-2.41727	-2.42079	-2.42388	-2.42705	-2.42981	-2.43207	-2.43492	-2.4382	-2.44155	-2.44478	-2.44755	-2.45113	-2.45428	-2.45766	-2.46112	-2.46427	-2.46716	-2.47008	-2.47264	-2.47497	-2.477	-2.47897	-2.48067	-2.48218	-2.48349	-2.48451	-2.48528	-2.48618	-2.48675	-2.48725	-2.48741	-2.48795	-2.48765	-2.48784	-2.48806
60	Anonymous participant OD 60			-3.02957	-3.0289	-3.02786	-3.02639	-3.024	-3.02186	-3.0185	-3.01464	-3.01248	-3.00992	-3.00676	-3.00457	-3.00204	-2.99952	-2.99772	-2.99534	-2.99364	-2.99163	-2.99008	-2.9877	-2.98419	-2.9795	-2.97353	-2.96996	-2.96579	-2.95955	-2.95596	-2.95413	-2.95062	-2.9458	-2.94331	-2.94125	-2.9403	-2.93778	-2.93486	-2.93215	-2.93049	-2.92917	-2.92813	-2.92645	-2.92593	-2.92423	-2.92343	-2.92302	-2.92145	-2.92071
61	Anonymous participant OD 61			-2.90728	-2.91637	-2.92081	-2.92457	-2.92939	-2.93293	-2.93635	-2.93783	-2.93887	-2.93995	-2.94162	-2.943	-2.94319	-2.9435	-2.94205	-2.9391	-2.93765	-2.93531	-2.93255	-2.92913	-2.92391	-2.9157	-2.90901	-2.9014	-2.89153	-2.88305	-2.87544	-2.8656	-2.8522	-2.84224	-2.82912	-2.81961	-2.80741	-2.79994	-2.79117	-2.78459	-2.78058	-2.77499	NaN	NaN	NaN	NaN	NaN	NaN	NaN	NaN
62	Anonymous participant OD 62			-3.05654	-3.0589	-3.06138	-3.06657	-3.07055	-3.074	-3.07961	-3.08562	-3.09092	-3.09619	-3.10138	-3.10707	-3.11315	-3.11812	-3.12381	-3.12937	-3.13566	-3.13993	-3.14501	-3.14893	-3.15544	-3.16047	-3.16476	-3.16956	-3.17517	-3.17868	-3.18265	-3.18611	-3.19077	-3.19482	-3.19964	-3.20313	-3.20742	-3.21158	-3.21566	-3.21973	-3.22296	-3.22705	-3.23041	-3.23377	-3.23778	-3.24259	-3.24618	-3.25073	-3.25487	-3.25784
63	Anonymous participant OD 63			-2.92391	-2.92245	-2.91879	-2.91426	-2.91006	-2.90808	-2.90749	-2.9063	-2.90466	-2.90412	-2.90324	-2.90241	-2.90169	-2.89983	-2.89796	-2.89589	-2.89382	-2.89171	-2.8905	-2.88973	-2.88838	-2.88634	-2.88403	-2.88245	-2.8792	-2.87741	-2.8728	-2.86557	-2.85796	-2.8513	-2.8471	-2.84537	-2.84387	-2.84178	-2.84152	-2.84126	-2.84083	-2.84132	-2.84093	-2.84113	-2.84122	-2.84094	-2.84084	-2.84097	-2.84192	-2.84248
64	Anonymous participant OD 64			-3.25607	-3.25601	-3.25558	-3.25545	-3.25409	-3.25308	-3.25217	-3.25009	-3.24898	-3.24738	-3.24541	-3.24297	-3.23965	-3.23746	-3.23436	-3.23095	-3.22881	-3.22492	-3.22097	-3.21846	-3.21627	-3.21315	-3.20979	-3.20717	-3.20432	-3.20159	-3.19887	-3.19611	-3.19317	-3.19101	-3.18747	-3.1855	-3.18232	-3.18031	-3.17621	-3.17427	-3.17083	-3.16681	-3.16365	-3.16023	-3.15759	-3.15443	-3.15208	-3.15018	-3.149	-3.14822
65	Anonymous participant OD 65			-2.95301	-2.95143	-2.94885	-2.94747	-2.94552	-2.94455	-2.9431	-2.94257	-2.94139	-2.94106	-2.94098	-2.93983	-2.93962	-2.93867	-2.9371	-2.93488	-2.93183	-2.92819	-2.92233	-2.91758	-2.91076	-2.9028	-2.89502	-2.88607	-2.87716	-2.86774	-2.85675	-2.8467	-2.83572	-2.82268	-2.80857	-2.79254	-2.77879	-2.76418	-2.7478	-2.73011	-2.71299	-2.69804	-2.68451	-2.66691	-2.65281	-2.63886	-2.62277	-2.60743	-2.594	-2.58353
66	Anonymous participant OD 66			-2.74096	-2.73868	-2.73703	-2.73532	-2.7345	-2.73305	-2.73112	-2.7299	-2.72929	-2.72957	-2.73174	-2.73269	-2.73374	-2.73564	-2.73705	-2.7395	-2.74394	-2.7468	-2.75021	-2.75574	-2.76044	-2.76442	-2.76951	-2.77332	-2.77834	-2.78204	-2.78596	-2.78933	-2.79286	-2.79636	-2.79924	-2.8019	-2.80372	-2.8053	-2.80699	-2.80819	-2.80913	-2.81085	-2.81141	-2.81078	-2.80831	-2.80466	-2.80196	-2.79985	-2.79694	-2.79406
67	Anonymous participant OD 67			-3.11069	-3.11233	-3.11543	-3.11768	-3.12016	-3.12367	-3.12746	-3.13122	-3.13516	-3.13975	-3.14349	-3.14731	-3.1508	-3.15352	-3.1572	-3.16053	-3.16334	-3.16598	-3.16952	-3.17269	-3.17609	-3.17929	-3.18254	-3.18635	-3.18851	-3.19081	-3.19431	-3.19807	-3.20074	-3.2042	-3.2062	-3.20798	-3.20938	-3.21103	-3.21186	-3.21317	-3.21405	-3.21461	-3.21583	-3.21642	-3.2175	-3.21665	-3.21404	-3.21168	-3.2107	-3.21051
68	Anonymous participant OD 68			-2.50967	-2.50553	-2.50079	-2.49735	-2.49355	-2.48957	-2.48697	-2.48372	-2.47956	-2.47704	-2.47516	-2.47269	-2.46946	-2.46655	-2.46516	-2.46254	-2.4606	-2.45742	-2.45566	-2.45367	-2.45159	-2.44892	-2.44614	-2.44241	-2.43952	-2.43552	-2.43179	-2.42803	-2.42394	-2.41992	-2.41692	-2.41261	-2.40867	-2.40518	-2.40275	-2.39993	-2.39701	-2.39392	-2.39031	-2.38812	-2.38648	-2.38557	-2.3835	-2.38169	-2.38069	-2.38026
69	Anonymous participant OD 69			-2.29209	-2.29353	-2.29526	-2.29702	-2.29923	-2.30098	-2.30442	-2.30991	-2.31629	-2.3223	-2.32542	-2.32668	-2.32816	-2.32971	-2.3318	-2.33532	-2.34026	-2.34363	-2.34736	-2.35112	-2.35462	-2.35684	-2.35949	-2.36218	-2.36483	-2.36691	-2.36866	-2.37044	-2.3721	-2.37317	-2.37414	-2.37497	-2.3757	-2.37657	-2.37736	-2.37839	-2.37963	-2.38092	-2.3815	-2.38244	-2.38274	-2.38368	-2.38396	-2.38405	-2.38463	-2.38469
70	Anonymous participant OD 70			-3.06602	-3.06441	-3.06293	-3.062	-3.06149	-3.06209	-3.06295	-3.06353	-3.06397	-3.06552	-3.06605	-3.06796	-3.06955	-3.07095	-3.07202	-3.07352	-3.07554	-3.07741	-3.07979	-3.08224	-3.08484	-3.08813	-3.09152	-3.09531	-3.09919	-3.10241	-3.10652	-3.10944	-3.11216	-3.11473	-3.11785	-3.11989	-3.12155	-3.12346	-3.12541	-3.12667	-3.12817	-3.12923	-3.13023	-3.13107	-3.13098	-3.13063	-3.13123	-3.13154	-3.13193	-3.13111
71	Anonymous participant OD 71			-2.98006	-2.97652	-2.97142	-2.96621	-2.96217	-2.95773	-2.95294	-2.94752	-2.94198	-2.93556	-2.9297	-2.92303	-2.91625	-2.9091	-2.90173	-2.89382	-2.886	-2.87703	-2.86855	-2.85972	-2.85161	-2.84369	-2.83663	-2.82877	-2.82049	-2.81244	-2.80574	-2.7977	-2.79127	-2.78524	-2.77895	-2.77333	-2.76822	-2.76364	-2.7584	-2.75475	-2.75078	-2.74663	-2.74277	-2.73964	-2.73741	-2.73514	-2.73355	-2.73268	-2.73018	-2.72891
72	Anonymous participant OD 72			-3.11621	-3.12158	-3.12791	-3.13719	-3.14151	-3.14509	-3.14934	-3.15522	-3.16075	-3.16275	-3.16404	-3.16432	-3.16092	-3.1569	-3.15304	-3.1513	-3.14763	-3.14558	-3.14492	-3.14503	-3.14479	-3.14628	-3.14713	-3.14706	-3.14659	-3.14648	-3.14506	-3.14254	-3.13821	-3.13527	-3.13092	-3.12808	-3.12494	-3.12188	-3.11745	-3.11204	-3.10935	-3.10737	-3.1028	-3.10019	-3.09393	-3.08871	-3.08409	-3.07736	-3.07277	-3.0686
73	Anonymous participant OD 73			-3.02957	-3.0289	-3.02786	-3.02639	-3.024	-3.02186	-3.0185	-3.01464	-3.01248	-3.00992	-3.00676	-3.00457	-3.00204	-2.99952	-2.99772	-2.99534	-2.99364	-2.99163	-2.99008	-2.9877	-2.98419	-2.9795	-2.97353	-2.96996	-2.96579	-2.95955	-2.95596	-2.95413	-2.95062	-2.9458	-2.94331	-2.94125	-2.9403	-2.93778	-2.93486	-2.93215	-2.93049	-2.92917	-2.92813	-2.92645	-2.92593	-2.92423	-2.92343	-2.92302	-2.92145	-2.92071
74	Anonymous participant OD 74			-3.07657	-3.08964	-3.10103	-3.11522	-3.12869	-3.14253	-3.15696	-3.17029	-3.18433	-3.19607	-3.20528	-3.215	-3.2237	-3.23168	-3.23838	-3.24425	-3.24988	-3.25296	-3.25647	-3.2589	-3.26056	-3.26098	-3.25981	-3.25839	-3.25763	-3.25578	-3.25351	-3.25076	-3.24924	-3.24675	-3.24315	-3.24137	-3.2383	-3.23532	-3.23191	-3.22978	-3.22503	-3.22139	-3.2169	-3.21217	-3.20702	-3.20104	-3.19606	-3.19088	-3.18642	-3.18169
75	Anonymous participant OD 75			-2.68898	-2.69275	-2.69593	-2.70048	-2.70445	-2.70863	-2.71273	-2.71658	-2.72174	-2.72692	-2.73234	-2.73825	-2.74426	-2.74954	-2.75559	-2.76063	-2.7666	-2.77078	-2.77667	-2.78185	-2.78914	-2.79495	-2.80231	-2.80865	-2.81656	-2.82177	-2.82903	-2.83518	-2.84158	-2.84787	-2.85431	-2.85946	-2.86433	-2.86873	-2.87254	-2.87626	-2.88013	-2.88379	-2.88744	-2.89157	-2.89554	-2.90005	-2.90419	-2.90843	-2.91318	-2.91804
76	Anonymous participant OD 76			-2.97203	-2.97468	-2.97572	-2.97735	-2.97937	-2.98219	-2.98491	-2.98712	-2.9918	-2.99587	-3.00115	-3.00667	-3.01081	-3.01534	-3.01885	-3.02082	-3.02292	-3.02319	-3.02393	-3.02361	-3.02344	-3.02206	-3.01952	-3.0164	-3.01524	-3.01316	-3.01157	-3.01053	-3.00922	-3.00757	-3.00623	-3.00328	-3.00118	-2.99872	-2.99637	-2.99489	-2.99199	-2.99026	-2.98841	-2.98666	-2.98476	-2.98269	-2.98158	-2.98065	-2.97951	-2.9784
77	Anonymous participant OD 77			-2.90728	-2.91637	-2.92081	-2.92457	-2.92939	-2.93293	-2.93635	-2.93783	-2.93887	-2.93995	-2.94162	-2.943	-2.94319	-2.9435	-2.94205	-2.9391	-2.93765	-2.93531	-2.93255	-2.92913	-2.92391	-2.9157	-2.90901	-2.9014	-2.89153	-2.88305	-2.87544	-2.8656	-2.8522	-2.84224	-2.82912	-2.81961	-2.80741	-2.79994	-2.79117	-2.78459	-2.78058	-2.77499	NaN	NaN	NaN	NaN	NaN	NaN	NaN	NaN
78	Anonymous participant OD 78			-2.89669	-2.89355	-2.88974	-2.88537	-2.88288	-2.88078	-2.87825	-2.87666	-2.87523	-2.87427	-2.87281	-2.87412	-2.87812	-2.88317	-2.88782	-2.89136	-2.8948	-2.89769	-2.90049	-2.90422	-2.9095	-2.9137	-2.91799	-2.92166	-2.92628	-2.92983	-2.9342	-2.93951	-2.94447	-2.94726	-2.95209	-2.95576	-2.95943	-2.96255	-2.96414	-2.96654	-2.96758	-2.96908	-2.97003	-2.97138	-2.97206	-2.97242	-2.97198	-2.97281	-2.97324	-2.99524
79	Anonymous participant OD 79			-2.98006	-2.97652	-2.97142	-2.96621	-2.96217	-2.95773	-2.95294	-2.94752	-2.94198	-2.93556	-2.9297	-2.92303	-2.91625	-2.9091	-2.90173	-2.89382	-2.886	-2.87703	-2.86855	-2.85972	-2.85161	-2.84369	-2.83663	-2.82877	-2.82049	-2.81244	-2.80574	-2.7977	-2.79127	-2.78524	-2.77895	-2.77333	-2.76822	-2.76364	-2.7584	-2.75475	-2.75078	-2.74663	-2.74277	-2.73964	-2.73741	-2.73514	-2.73355	-2.73268	-2.73018	-2.72891
80	Anonymous participant OD 80			-2.65244	-2.64932	-2.64618	-2.64225	-2.63721	-2.63375	-2.62847	-2.62404	-2.61855	-2.61557	-2.61286	-2.61136	-2.60861	-2.60595	-2.60478	-2.60301	-2.60185	-2.60035	-2.59899	-2.59562	-2.59391	-2.59199	-2.58974	-2.5877	-2.58547	-2.5834	-2.58402	-2.58457	-2.58658	-2.58809	-2.58815	-2.58725	-2.58549	-2.58441	-2.58207	-2.58127	-2.58012	-2.58023	-2.58084	-2.58129	-2.58235	-2.5853	-2.58631	-2.58703	-2.5881	-2.58571
81	Anonymous participant OD 81			-2.44964	-2.45958	-2.48391	-2.51258	-2.53664	-2.54843	-2.55413	-2.55952	-2.5652	-2.57144	-2.57495	-2.57763	-2.58012	-2.58162	-2.58348	-2.58475	-2.58539	-2.58689	-2.58855	-2.59045	-2.59213	-2.59383	-2.59747	-2.60131	-2.60478	-2.60896	-2.61399	-2.62106	-2.62924	-2.63608	-2.64082	-2.64255	-2.64478	-2.64672	-2.64805	-2.64876	-2.64888	-2.64865	-2.64834	-2.64807	-2.6479	-2.64782	-2.64847	-2.64858	-2.64802	-2.64756
82	Anonymous participant OD 82			-2.44964	-2.45958	-2.48391	-2.51258	-2.53664	-2.54843	-2.55413	-2.55952	-2.5652	-2.57144	-2.57495	-2.57763	-2.58012	-2.58162	-2.58348	-2.58475	-2.58539	-2.58689	-2.58855	-2.59045	-2.59213	-2.59383	-2.59747	-2.60131	-2.60478	-2.60896	-2.61399	-2.62106	-2.62924	-2.63608	-2.64082	-2.64255	-2.64478	-2.64672	-2.64805	-2.64876	-2.64888	-2.64865	-2.64834	-2.64807	-2.6479	-2.64782	-2.64847	-2.64858	-2.64802	-2.64756
83	Anonymous participant OD 83			-1.93915	-1.93828	-1.93779	-1.9364	-1.9352	-1.93368	-1.93164	-1.92923	-1.9264	-1.92358	-1.92041	-1.91848	-1.91825	-1.91912	-1.9202	-1.92104	-1.9203	-1.92036	-1.92046	-1.92125	-1.922	-1.92257	-1.92333	-1.92407	-1.92495	-1.92581	-1.92739	-1.92984	-1.9327	-1.936	-1.93897	-1.94382	-1.94967	-1.95648	-1.96148	-1.96477	-1.96717	-1.96884	-1.97103	-1.97324	-1.97598	-1.98002	-1.98683	-1.99513	-2.00155	-2.0063
84	Anonymous participant OD 84			-2.86173	-2.86158	-2.86112	-2.86097	-2.8614	-2.86198	-2.86245	-2.86297	-2.86293	-2.86361	-2.86486	-2.86603	-2.86763	-2.86982	-2.87181	-2.8751	-2.87906	-2.88036	-2.88224	-2.88498	-2.88859	-2.8915	-2.89416	-2.89511	-2.89706	-2.89789	-2.89901	-2.89985	-2.90094	-2.90203	-2.90344	-2.90378	-2.90448	-2.90509	-2.90384	-2.90347	-2.9019	-2.89998	-2.89633	-2.89246	-2.89075	-2.88805	-2.883	-2.88021	-2.87888	-2.87626
85	Anonymous participant OD 85			-3.145	-3.14791	-3.14969	-3.15235	-3.15577	-3.15714	-3.15872	-3.1594	-3.16098	-3.16357	-3.16624	-3.1694	-3.17237	-3.17443	-3.17568	-3.1764	-3.17786	-3.17763	-3.17784	-3.17669	-3.17612	-3.17482	-3.17472	-3.17442	-3.17489	-3.17355	-3.17457	-3.17518	-3.17608	-3.17653	-3.17721	-3.17708	-3.17756	-3.17692	-3.17672	-3.17548	-3.17497	-3.1754	-3.17472	-3.17518	-3.17557	-3.17616	-3.17521	-3.1753	-3.17595	-3.17657
86	Anonymous participant OD 86			-2.60477	-2.60449	-2.60376	-2.60363	-2.60401	-2.60438	-2.60497	-2.60517	-2.60587	-2.60692	-2.60826	-2.60955	-2.61288	-2.61485	-2.61786	-2.62101	-2.62519	-2.6271	-2.63135	-2.63467	-2.63955	-2.64372	-2.64842	-2.65322	-2.65863	-2.66329	-2.66845	-2.67337	-2.67873	-2.68376	-2.68967	-2.69499	-2.70041	-2.70611	-2.71163	-2.71763	-2.72275	-2.7281	-2.73334	-2.73865	-2.74353	-2.74943	-2.75413	-2.75953	-2.76542	-2.77083
87	Anonymous participant OD 87			-2.80129	-2.80261	-2.80399	-2.80502	-2.8058	-2.80688	-2.80774	-2.81028	-2.8119	-2.8142	-2.81687	-2.81936	-2.82216	-2.82553	-2.82797	-2.83068	-2.83463	-2.83708	-2.8411	-2.84374	-2.84757	-2.85133	-2.85504	-2.85847	-2.86274	-2.86652	-2.87023	-2.87305	-2.87619	-2.87944	-2.88517	-2.88899	-2.89402	-2.8991	-2.90364	-2.90687	-2.91076	-2.91493	-2.91809	-2.92048	-2.92236	-2.92441	-2.9256	-2.92713	-2.92859	-2.92956
88	Anonymous participant OD 88			-2.3569	-2.3668	-2.37735	-2.38788	-2.39856	-2.40916	-2.42076	-2.43044	-2.44017	-2.45142	-2.46177	-2.47102	-2.48123	-2.4902	-2.49998	-2.50898	-2.5172	-2.52646	-2.5336	-2.54222	-2.5511	-2.55743	-2.56542	-2.57184	-2.57826	-2.58563	-2.5942	-2.60121	-2.60913	-2.6164	-2.62227	NaN	NaN	NaN	NaN	NaN	NaN	NaN	NaN	NaN	NaN	NaN	NaN	NaN	NaN	NaN
[truncated: 315 more columns]

## Sheet: OD_RL
Radius of limbus (mm) (Right eyes)
count	Name		Angle (degree)	0	1	2	3	4	5	6	7	8	9	10	11	12	13	14	15	16	17	18	19	20	21	22	23	24	25	26	27	28	29	30	31	32	33	34	35	36	37	38	39	40	41	42	43	44	45
				RL	RL	RL	RL	RL	RL	RL	RL	RL	RL	RL	RL	RL	RL	RL	RL	RL	RL	RL	RL	RL	RL	RL	RL	RL	RL	RL	RL	RL	RL	RL	RL	RL	RL	RL	RL	RL	RL	RL	RL	RL	RL	RL	RL	RL	RL
1	Anonymous participant OD 1			6.74205	6.74022	6.73556	6.72927	6.72258	6.7167	6.71082	6.70413	6.69785	6.69318	6.69136	6.69136	6.69136	6.69136	6.69136	6.69136	6.68872	6.68244	6.67493	6.66865	6.66601	6.66601	6.66601	6.66601	6.66601	6.66601	6.66601	6.66601	6.66601	6.66601	6.66601	6.66246	6.65246	6.63702	6.61711	6.59373	6.56787	6.54053	6.51269	6.48534	6.45949	6.43611	6.4162	6.40075	6.39076	6.3872
2	Anonymous participant OD 2			6.98905	6.98905	6.98905	6.98905	6.98905	6.98905	6.98905	6.98905	6.98905	6.98905	6.98905	6.98905	6.98905	6.98905	6.98905	6.98905	6.98905	6.98905	6.98905	6.98905	6.98905	6.98905	6.98905	6.98905	6.98905	6.98905	6.98905	6.98905	6.98905	6.98905	6.98905	6.98905	6.98905	6.98905	6.98905	6.98905	6.98905	6.98905	6.98905	6.98905	6.98905	6.98905	6.98905	6.98905	6.98905	6.98905
3	Anonymous participant OD 3			6.74554	6.74554	6.74554	6.74554	6.74554	6.74554	6.74554	6.74554	6.74554	6.74554	6.74554	6.7482	6.75453	6.7621	6.76843	6.77109	6.77109	6.77109	6.77109	6.77109	6.77109	6.77109	6.77109	6.77109	6.77109	6.77109	6.77109	6.77109	6.77109	6.77109	6.77109	6.77109	6.77109	6.77109	6.77109	6.77109	6.77109	6.77109	6.77109	6.77109	6.77109	6.77109	6.77109	6.77109	6.77109	6.77109
4	Anonymous participant OD 4			6.98135	6.98135	6.98135	6.98135	6.98135	6.98135	6.98135	6.98135	6.98135	6.98135	6.98135	6.98135	6.98135	6.98135	6.98135	6.98135	6.98135	6.98135	6.98135	6.98135	6.98135	6.98135	6.98135	6.98135	6.98135	6.98135	6.98135	6.98135	6.98135	6.98135	6.98135	6.98135	6.98135	6.98135	6.98135	6.98135	6.98135	6.98135	6.98135	6.98135	6.98135	6.98135	6.98135	6.98135	6.98135	6.98135
5	Anonymous participant OD 5			6.99343	6.99343	6.99343	6.99343	6.99343	6.99343	6.99343	6.99343	6.99343	6.99343	6.99343	6.99343	6.99343	6.99343	6.99343	6.99343	6.99343	6.99343	6.99343	6.99343	6.99343	6.99343	6.99343	6.99343	6.99343	6.99343	6.99343	6.99343	6.99343	6.99343	6.99343	6.99343	6.99343	6.99343	6.99343	6.99343	6.99343	6.99343	6.99343	6.99343	6.99343	6.99343	6.99343	6.99343	6.99343	6.99343
6	Anonymous participant OD 6			6.98102	6.98102	6.98102	6.98102	6.98102	6.98102	6.98102	6.98102	6.98102	6.98102	6.98102	6.97815	6.97131	6.96314	6.9563	6.95343	6.95343	6.95343	6.95343	6.95343	6.95343	6.95343	6.95343	6.95343	6.95343	6.95343	6.95343	6.95343	6.95343	6.95343	6.95343	6.95343	6.95343	6.95343	6.95343	6.95343	6.95343	6.95343	6.95343	6.95343	6.95343	6.95343	6.95343	6.95343	6.95343	6.95343
7	Anonymous participant OD 7			6.88802	6.88802	6.88802	6.88802	6.88802	6.88802	6.88802	6.88802	6.88802	6.88802	6.88802	6.88802	6.88802	6.88802	6.88802	6.88802	6.88802	6.88802	6.88802	6.88802	6.88802	6.88802	6.88802	6.88802	6.88802	6.88802	6.88802	6.88802	6.88802	6.88802	6.88802	6.8881	6.88833	6.88872	6.88924	6.88991	6.89071	6.89164	6.8927	6.89387	6.89515	6.89654	6.89804	6.89962	6.9013	6.90307
8	Anonymous participant OD 8			6.90819	6.90819	6.90819	6.90819	6.90819	6.90819	6.90819	6.90819	6.90819	6.90819	6.90819	6.90819	6.90819	6.90819	6.90819	6.90819	6.90819	6.90819	6.90819	6.90819	6.90819	6.90819	6.90819	6.90819	6.90819	6.90819	6.90819	6.90819	6.90819	6.90819	6.90819	6.90819	6.90819	6.90819	6.90819	6.90819	6.90819	6.90819	6.90819	6.90819	6.90819	6.90819	6.90819	6.90819	6.90819	6.90819
9	Anonymous participant OD 9			6.69619	6.69619	6.69619	6.69619	6.69619	6.69619	6.69619	6.69619	6.69619	6.69619	6.69619	6.69619	6.69619	6.69619	6.69619	6.69619	6.69619	6.69619	6.69619	6.69619	6.69619	6.69619	6.69619	6.69619	6.69619	6.69619	6.69619	6.69619	6.69619	6.69619	6.69619	6.69619	6.69619	6.69619	6.69619	6.69619	6.69871	6.70473	6.71191	6.71793	6.72045	6.72045	6.72045	6.72045	6.72045	6.72045
10	Anonymous participant OD 10			6.99279	6.99279	6.99279	6.99279	6.99279	6.99279	6.99279	6.99279	6.99279	6.99279	6.99279	6.99279	6.99279	6.99279	6.99279	6.99279	6.99279	6.99279	6.99279	6.99279	6.99279	6.99279	6.99279	6.99279	6.99279	6.99279	6.99279	6.99279	6.99279	6.99279	6.99279	6.99279	6.99279	6.99279	6.99279	6.99279	6.99279	6.99279	6.99279	6.99279	6.99279	6.99279	6.99279	6.99279	6.99279	6.99279
11	Anonymous participant OD 11			6.41712	6.41894	6.42359	6.42985	6.43652	6.44238	6.44717	6.45168	6.45633	6.46152	6.46765	6.47528	6.48446	6.49489	6.50624	6.51818	6.53234	6.54916	6.56646	6.58212	6.59397	6.60317	6.61231	6.62138	6.63039	6.63933	6.6482	6.657	6.66573	6.67438	6.68296	6.69145	6.69987	6.70821	6.71647	6.72464	6.73272	6.74072	6.74863	6.75645	6.76417	6.7718	6.77934	6.78677	6.79411	6.80135
12	Anonymous participant OD 12			6.99433	6.99433	6.99433	6.99433	6.99433	6.99433	6.99433	6.99433	6.99433	6.99433	6.99433	6.99433	6.99433	6.99433	6.99433	6.99433	6.99433	6.99433	6.99433	6.99433	6.99433	6.99433	6.99433	6.99433	6.99433	6.99433	6.99433	6.99433	6.99433	6.99433	6.99433	6.99433	6.99433	6.99433	6.99433	6.99433	6.99433	6.99433	6.99433	6.99433	6.99433	6.99433	6.99433	6.99433	6.99433	6.99433
13	Anonymous participant OD 13			6.97721	6.97721	6.97721	6.97721	6.97721	6.97721	6.97721	6.97721	6.97721	6.97721	6.97721	6.97721	6.97721	6.97721	6.97721	6.97721	6.97721	6.97721	6.97721	6.97721	6.97721	6.97721	6.97721	6.97721	6.97721	6.97721	6.97721	6.97721	6.97721	6.97721	6.97721	6.97721	6.97721	6.97721	6.97721	6.97721	6.97721	6.97721	6.97721	6.97721	6.97721	6.97721	6.97721	6.97721	6.97721	6.97721
14	Anonymous participant OD 14			6.68158	6.68158	6.68158	6.68158	6.68158	6.68158	6.68158	6.68158	6.68158	6.68158	6.68158	6.68158	6.68158	6.68158	6.68158	6.68158	6.68158	6.68158	6.68158	6.68158	6.68158	6.67866	6.67169	6.66338	6.65642	6.6535	6.6535	6.6535	6.6535	6.6535	6.6535	6.6535	6.6535	6.6535	6.6535	6.6535	6.6535	6.6535	6.6535	6.6535	6.6535	6.6535	6.6535	6.6535	6.6535	6.6535
15	Anonymous participant OD 15			5.89515	5.89781	5.90417	5.91176	5.91811	5.92078	5.92078	5.92078	5.92078	5.92078	5.92078	5.92345	5.9298	5.93739	5.94375	5.94641	5.94641	5.94641	5.94641	5.94641	5.94641	5.94826	5.95297	5.95933	5.9661	5.97204	5.97799	5.98476	5.99111	5.99583	5.99767	5.99767	5.99767	5.99767	5.99767	5.99767	5.99767	5.99767	5.99767	5.99767	5.99767	6.00034	6.0067	6.01428	6.02064	6.0233
16	Anonymous participant OD 16			6.8998	6.8998	6.8998	6.8998	6.8998	6.8998	6.8998	6.8998	6.8998	6.8998	6.8998	6.8998	6.8998	6.8998	6.8998	6.8998	6.8998	6.8998	6.8998	6.8998	6.8998	6.8998	6.8998	6.8998	6.8998	6.8998	6.8998	6.8998	6.8998	6.8998	6.8998	6.8998	6.8998	6.8998	6.8998	6.8998	6.8998	6.8998	6.8998	6.8998	6.8998	6.8998	6.8998	6.8998	6.8998	6.8998
17	Anonymous participant OD 17			6.79054	6.79054	6.79054	6.79054	6.79054	6.79054	6.79054	6.79054	6.79054	6.79054	6.79054	6.79054	6.79054	6.79054	6.79054	6.79054	6.79054	6.79054	6.79054	6.79054	6.79054	6.79054	6.79054	6.79054	6.79054	6.79054	6.79054	6.79054	6.79054	6.79054	6.79054	6.79054	6.79054	6.79054	6.79054	6.79054	6.79054	6.79054	6.79054	6.79054	6.79054	6.79054	6.79054	6.79054	6.79054	6.79054
18	Anonymous participant OD 18			6.9854	6.9854	6.9854	6.9854	6.9854	6.9854	6.9854	6.9854	6.9854	6.9854	6.9854	6.9854	6.9854	6.9854	6.9854	6.9854	6.9854	6.9854	6.9854	6.9854	6.9854	6.9854	6.9854	6.9854	6.9854	6.9854	6.9854	6.9854	6.9854	6.9854	6.9854	6.9854	6.9854	6.9854	6.9854	6.9854	6.9854	6.9854	6.9854	6.9854	6.9854	6.9854	6.9854	6.9854	6.9854	6.9854
19	Anonymous participant OD 19			6.50222	6.50222	6.50222	6.50222	6.50222	6.50222	6.50496	6.51149	6.51928	6.52581	6.52855	6.52855	6.52855	6.52855	6.52855	6.52855	6.52855	6.52855	6.52855	6.52855	6.52855	6.52855	6.52855	6.52855	6.52855	6.52855	6.52855	6.52855	6.52855	6.52855	6.52855	6.52855	6.52855	6.52855	6.52855	6.52855	6.52855	6.52855	6.52855	6.52855	6.52855	6.52855	6.52855	6.52855	6.52855	6.52855
20	Anonymous participant OD 20			6.98832	6.98832	6.98832	6.98832	6.98832	6.98832	6.98832	6.98832	6.98832	6.98832	6.98832	6.98832	6.98832	6.98832	6.98832	6.98832	6.98832	6.98832	6.98832	6.98832	6.98832	6.98832	6.98832	6.98832	6.98832	6.98832	6.98832	6.98832	6.98832	6.98832	6.98832	6.98832	6.98832	6.98832	6.98832	6.98832	6.98832	6.98832	6.98832	6.98832	6.98832	6.98832	6.98832	6.98832	6.98832	6.98832
21	Anonymous participant OD 21			6.93888	6.9381	6.93732	6.93653	6.93575	6.93497	6.9342	6.93344	6.93269	6.93196	6.93125	6.93057	6.92991	6.92928	6.92868	6.92812	6.9276	6.92711	6.92668	6.92629	6.92595	6.92567	6.92545	6.92528	6.92518	6.92515	6.92515	6.92515	6.92515	6.92515	6.92515	6.92515	6.92515	6.92515	6.92515	6.92515	6.92515	6.92515	6.92515	6.92515	6.92515	6.92515	6.92515	6.92515	6.92515	6.92515
22	Anonymous participant OD 22			6.96664	6.96664	6.96664	6.96664	6.96664	6.96664	6.96664	6.96664	6.96664	6.96664	6.96664	6.96405	6.95788	6.95052	6.94435	6.94176	6.94176	6.94176	6.94176	6.94176	6.94176	6.94176	6.94176	6.94176	6.94176	6.94176	6.94176	6.94176	6.94176	6.94176	6.94176	6.94176	6.94176	6.94176	6.94176	6.94176	6.94176	6.94176	6.94176	6.94176	6.94176	6.94176	6.94176	6.94176	6.94176	6.94176
23	Anonymous participant OD 23			6.80343	6.80343	6.80343	6.80343	6.80343	6.80343	6.80613	6.81257	6.82025	6.82669	6.8294	6.8294	6.8294	6.8294	6.8294	6.8294	6.8294	6.8294	6.8294	6.8294	6.8294	6.8294	6.8294	6.8294	6.8294	6.8294	6.8294	6.8294	6.8294	6.8294	6.8294	6.8294	6.8294	6.8294	6.8294	6.8294	6.8321	6.83854	6.84622	6.85266	6.85536	6.85536	6.85536	6.85536	6.85536	6.85536
24	Anonymous participant OD 24			6.97808	6.97808	6.97808	6.97808	6.97808	6.97808	6.97808	6.97808	6.97808	6.97808	6.97808	6.97808	6.97808	6.97808	6.97808	6.97808	6.97808	6.97808	6.97808	6.97808	6.97808	6.97808	6.97808	6.97808	6.97808	6.97808	6.97808	6.97808	6.97808	6.97808	6.97808	6.97808	6.97808	6.97808	6.97808	6.97808	6.97808	6.97808	6.97808	6.97808	6.97808	6.97808	6.97808	6.97808	6.97808	6.97808
25	Anonymous participant OD 25			6.35881	6.35881	6.35881	6.35881	6.35881	6.35881	6.35881	6.35881	6.35881	6.35881	6.35881	6.35881	6.35881	6.35881	6.35881	6.35881	6.35598	6.34924	6.3412	6.33446	6.33163	6.33163	6.33163	6.33163	6.33163	6.33163	6.33163	6.33163	6.33163	6.33163	6.33163	6.33163	6.33163	6.33163	6.33163	6.33163	6.33163	6.33163	6.33163	6.33163	6.33163	6.33163	6.33163	6.33163	6.33163	6.33163
26	Anonymous participant OD 26			6.98837	6.98837	6.98837	6.98837	6.98837	6.98837	6.98837	6.98837	6.98837	6.98837	6.98837	6.98837	6.98837	6.98837	6.98837	6.98837	6.98837	6.98837	6.98837	6.98837	6.98837	6.98837	6.98837	6.98837	6.98837	6.98837	6.98837	6.98837	6.98837	6.98837	6.98837	6.98837	6.98837	6.98837	6.98837	6.98837	6.98837	6.98837	6.98837	6.98837	6.98837	6.98837	6.98837	6.98837	6.98837	6.98837
27	Anonymous participant OD 27			6.98363	6.98363	6.98363	6.98363	6.98363	6.98363	6.98363	6.98363	6.98363	6.98363	6.98363	6.98363	6.98363	6.98363	6.98363	6.98363	6.98363	6.98363	6.98363	6.98363	6.98363	6.98363	6.98363	6.98363	6.98363	6.98363	6.98363	6.98363	6.98363	6.98363	6.98363	6.98363	6.98363	6.98363	6.98363	6.98363	6.98363	6.98363	6.98363	6.98363	6.98363	6.98363	6.98363	6.98363	6.98363	6.98363
28	Anonymous participant OD 28			6.4422	6.4422	6.4422	6.4422	6.4422	6.4422	6.4422	6.4422	6.4422	6.4422	6.4422	6.4422	6.4422	6.4422	6.4422	6.4422	6.4422	6.4422	6.4422	6.4422	6.4422	6.4422	6.4422	6.4422	6.4422	6.4422	6.4422	6.4422	6.4422	6.4422	6.4422	6.43929	6.43234	6.42405	6.4171	6.41419	6.41419	6.41419	6.41419	6.41419	6.41419	6.41419	6.41419	6.41419	6.41419	6.41419
29	Anonymous participant OD 29			6.98223	6.98223	6.98223	6.98223	6.98223	6.98223	6.98223	6.98223	6.98223	6.98223	6.98223	6.98223	6.98223	6.98223	6.98223	6.98223	6.98223	6.98223	6.98223	6.98223	6.98223	6.98223	6.98223	6.98223	6.98223	6.98223	6.98223	6.98223	6.98223	6.98223	6.98223	6.98223	6.98223	6.98223	6.98223	6.98223	6.98223	6.98223	6.98223	6.98223	6.98223	6.98223	6.98223	6.98223	6.98223	6.98223
30	Anonymous participant OD 30			6.98035	6.98035	6.98035	6.98035	6.98035	6.98035	6.98035	6.98035	6.98035	6.98035	6.98035	6.98035	6.98035	6.98035	6.98035	6.98035	6.98035	6.98035	6.98035	6.98035	6.98035	6.98035	6.98035	6.98035	6.98035	6.98035	6.98035	6.98035	6.98035	6.98035	6.98035	6.98035	6.98035	6.98035	6.98035	6.98035	6.98035	6.98035	6.98035	6.98035	6.98035	6.98035	6.98035	6.98035	6.98035	6.98035
31	Anonymous participant OD 31			6.98587	6.98587	6.98587	6.98587	6.98587	6.98587	6.98587	6.98587	6.98587	6.98587	6.98587	6.98587	6.98587	6.98587	6.98587	6.98587	6.98587	6.98587	6.98587	6.98587	6.98587	6.98587	6.98587	6.98587	6.98587	6.98587	6.98587	6.98587	6.98587	6.98587	6.98587	6.98587	6.98587	6.98587	6.98587	6.98587	6.98587	6.98587	6.98587	6.98587	6.98587	6.98587	6.98587	6.98587	6.98587	6.98587
32	Anonymous participant OD 32			6.35881	6.35881	6.35881	6.35881	6.35881	6.35881	6.35881	6.35881	6.35881	6.35881	6.35881	6.35881	6.35881	6.35881	6.35881	6.35881	6.35598	6.34924	6.3412	6.33446	6.33163	6.33163	6.33163	6.33163	6.33163	6.33163	6.33163	6.33163	6.33163	6.33163	6.33163	6.33163	6.33163	6.33163	6.33163	6.33163	6.33163	6.33163	6.33163	6.33163	6.33163	6.33163	6.33163	6.33163	6.33163	6.33163
33	Anonymous participant OD 33			6.99478	6.99478	6.99478	6.99478	6.99478	6.99478	6.99478	6.99478	6.99478	6.99478	6.99478	6.99478	6.99478	6.99478	6.99478	6.99478	6.99478	6.99478	6.99478	6.99478	6.99478	6.99478	6.99478	6.99478	6.99478	6.99478	6.99478	6.99478	6.99478	6.99478	6.99478	6.99478	6.99478	6.99478	6.99478	6.99478	6.99478	6.99478	6.99478	6.99478	6.99478	6.99478	6.99478	6.99478	6.99478	6.99478
34	Anonymous participant OD 34			6.29766	6.29766	6.29766	6.29766	6.29766	6.29766	6.29766	6.29766	6.29766	6.29766	6.29766	6.29766	6.29766	6.29766	6.29766	6.29766	6.29766	6.29766	6.29766	6.29766	6.29766	6.29766	6.29766	6.29766	6.29766	6.29766	6.29766	6.29766	6.29766	6.29766	6.29766	6.30027	6.30649	6.31392	6.32014	6.32275	6.32275	6.32275	6.32275	6.32275	6.32275	6.32275	6.32275	6.32275	6.32275	6.32275
35	Anonymous participant OD 35			6.961	6.961	6.961	6.961	6.961	6.961	6.961	6.961	6.961	6.961	6.961	6.961	6.961	6.961	6.961	6.961	6.961	6.961	6.961	6.961	6.961	6.95829	6.95183	6.94411	6.93764	6.93493	6.93493	6.93493	6.93493	6.93493	6.93493	6.93493	6.93493	6.93493	6.93493	6.93493	6.93495	6.93498	6.93504	6.93512	6.93523	6.93535	6.9355	6.93566	6.93585	6.93605
36	Anonymous participant OD 36			6.961	6.961	6.961	6.961	6.961	6.961	6.961	6.961	6.961	6.961	6.961	6.961	6.961	6.961	6.961	6.961	6.961	6.961	6.961	6.961	6.961	6.95829	6.95183	6.94411	6.93764	6.93493	6.93493	6.93493	6.93493	6.93493	6.93493	6.93493	6.93493	6.93493	6.93493	6.93493	6.93495	6.93498	6.93504	6.93512	6.93523	6.93535	6.9355	6.93566	6.93585	6.93605
37	Anonymous participant OD 37			6.98005	6.98005	6.98005	6.98005	6.98005	6.98005	6.98005	6.98005	6.98005	6.98005	6.98005	6.98005	6.98005	6.98005	6.98005	6.98005	6.98005	6.98005	6.98005	6.98005	6.98005	6.98005	6.98005	6.98005	6.98005	6.98005	6.98005	6.98005	6.98005	6.98005	6.98005	6.98005	6.98005	6.98005	6.98005	6.98005	6.98005	6.98005	6.98005	6.98005	6.98005	6.98005	6.98005	6.98005	6.98005	6.98005
38	Anonymous participant OD 38			5.923	5.923	5.923	5.923	5.923	5.923	5.923	5.923	5.923	5.923	5.923	5.92558	5.93172	5.93906	5.9452	5.94778	5.94778	5.94778	5.94778	5.94778	5.94778	5.94778	5.94778	5.94778	5.94778	5.94778	5.94778	5.94778	5.94778	5.94778	5.94778	5.95036	5.9565	5.96384	5.96999	5.97256	5.97256	5.97256	5.97256	5.97256	5.97256	5.97256	5.97256	5.97256	5.97256	5.97256
39	Anonymous participant OD 39			6.99095	6.99095	6.99095	6.99095	6.99095	6.99095	6.99095	6.99095	6.99095	6.99095	6.99095	6.99095	6.99095	6.99095	6.99095	6.99095	6.99095	6.99095	6.99095	6.99095	6.99095	6.99095	6.99095	6.99095	6.99095	6.99095	6.99095	6.99095	6.99095	6.99095	6.99095	6.99095	6.99095	6.99095	6.99095	6.99095	6.99095	6.99095	6.99095	6.99095	6.99095	6.99095	6.99095	6.99095	6.99095	6.99095
40	Anonymous participant OD 40			6.25422	6.25422	6.25422	6.25422	6.25422	6.25422	6.25422	6.25422	6.25422	6.25422	6.25422	6.25422	6.25422	6.25422	6.25422	6.25422	6.25422	6.25422	6.25422	6.25422	6.25422	6.25422	6.25422	6.25422	6.25422	6.25422	6.25422	6.25422	6.25422	6.25422	6.25422	6.25422	6.25422	6.25422	6.25422	6.25422	6.25422	6.25422	6.25422	6.25422	6.25422	6.25422	6.25422	6.25422	6.25422	6.25422
41	Anonymous participant OD 41			6.52122	6.52122	6.52122	6.52122	6.52122	6.52122	6.51862	6.51242	6.50503	6.49883	6.49623	6.49623	6.49623	6.49623	6.49623	6.49623	6.49623	6.49623	6.49623	6.49623	6.49623	6.49364	6.48744	6.48004	6.47385	6.47125	6.47125	6.47125	6.47125	6.47125	6.47125	6.47125	6.47125	6.47125	6.47125	6.47125	6.47125	6.47125	6.47125	6.47125	6.47125	6.46865	6.46245	6.45506	6.44886	6.44626
42	Anonymous participant OD 42			6.97691	6.97691	6.97691	6.97691	6.97691	6.97691	6.97691	6.97691	6.97691	6.97691	6.97691	6.97691	6.97691	6.97691	6.97691	6.97691	6.97691	6.97691	6.97691	6.97691	6.97691	6.97691	6.97691	6.97691	6.97691	6.97691	6.97691	6.97691	6.97691	6.97691	6.97691	6.97691	6.97691	6.97691	6.97691	6.97691	6.97691	6.97691	6.97691	6.97691	6.97691	6.97691	6.97691	6.97691	6.97691	6.97691
43	Anonymous participant OD 43			6.98446	6.98446	6.98446	6.98446	6.98446	6.98446	6.98446	6.98446	6.98446	6.98446	6.98446	6.98446	6.98446	6.98446	6.98446	6.98446	6.98446	6.98446	6.98446	6.98446	6.98446	6.98446	6.98446	6.98446	6.98446	6.98446	6.98446	6.98446	6.98446	6.98446	6.98446	6.98446	6.98446	6.98446	6.98446	6.98446	6.98446	6.98446	6.98446	6.98446	6.98446	6.98446	6.98446	6.98446	6.98446	6.98446
44	Anonymous participant OD 44			6.98771	6.98771	6.98771	6.98771	6.98771	6.98771	6.98771	6.98771	6.98771	6.98771	6.98771	6.98771	6.98771	6.98771	6.98771	6.98771	6.98771	6.98771	6.98771	6.98771	6.98771	6.98771	6.98771	6.98771	6.98771	6.98771	6.98771	6.98771	6.98771	6.98771	6.98771	6.98771	6.98771	6.98771	6.98771	6.98771	6.98771	6.98771	6.98771	6.98771	6.98771	6.98771	6.98771	6.98771	6.98771	6.98771
45	Anonymous participant OD 45			6.98771	6.98771	6.98771	6.98771	6.98771	6.98771	6.98771	6.98771	6.98771	6.98771	6.98771	6.98771	6.98771	6.98771	6.98771	6.98771	6.98771	6.98771	6.98771	6.98771	6.98771	6.98771	6.98771	6.98771	6.98771	6.98771	6.98771	6.98771	6.98771	6.98771	6.98771	6.98771	6.98771	6.98771	6.98771	6.98771	6.98771	6.98771	6.98771	6.98771	6.98771	6.98771	6.98771	6.98771	6.98771	6.98771
46	Anonymous participant OD 46			6.98882	6.98882	6.98882	6.98882	6.98882	6.98882	6.98882	6.98882	6.98882	6.98882	6.98882	6.98882	6.98882	6.98882	6.98882	6.98882	6.98882	6.98882	6.98882	6.98882	6.98882	6.98882	6.98882	6.98882	6.98882	6.98882	6.98882	6.98882	6.98882	6.98882	6.98882	6.98882	6.98882	6.98882	6.98882	6.98882	6.98882	6.98882	6.98882	6.98882	6.98882	6.98882	6.98882	6.98882	6.98882	6.98882
47	Anonymous participant OD 47			6.75584	6.75584	6.75584	6.75584	6.75584	6.75584	6.75847	6.76475	6.77224	6.77851	6.78114	6.78114	6.78114	6.78114	6.78114	6.78114	6.78114	6.78114	6.78114	6.78114	6.78114	6.78114	6.78114	6.78114	6.78114	6.78114	6.78378	6.79005	6.79754	6.80382	6.80645	6.80645	6.80645	6.80645	6.80645	6.80645	6.80645	6.80645	6.80645	6.80645	6.80645	6.80645	6.80645	6.80645	6.80645	6.80645
48	Anonymous participant OD 48			6.97946	6.97946	6.97946	6.97946	6.97946	6.97946	6.97946	6.97946	6.97946	6.97946	6.97946	6.97946	6.97946	6.97946	6.97946	6.97946	6.97946	6.97946	6.97946	6.97946	6.97946	6.97946	6.97946	6.97946	6.97946	6.97946	6.97946	6.97946	6.97946	6.97946	6.97946	6.97946	6.97946	6.97946	6.97946	6.97946	6.97946	6.97946	6.97946	6.97946	6.97946	6.97946	6.97946	6.97946	6.97946	6.97946
49	Anonymous participant OD 49			6.97351	6.97351	6.97351	6.97351	6.97351	6.97351	6.97351	6.97351	6.97351	6.97351	6.97351	6.97351	6.97351	6.97351	6.97351	6.97351	6.97351	6.97351	6.97351	6.97351	6.97351	6.97351	6.97351	6.97351	6.97351	6.97351	6.97351	6.97351	6.97351	6.97351	6.97351	6.97351	6.97351	6.97351	6.97351	6.97351	6.97351	6.97351	6.97351	6.97351	6.97351	6.97351	6.97351	6.97351	6.97351	6.97351
50	Anonymous participant OD 50			6.80864	6.80864	6.80864	6.80864	6.80864	6.80864	6.80864	6.80864	6.80864	6.80864	6.80864	6.80864	6.80864	6.80864	6.80864	6.80864	6.80864	6.80864	6.80864	6.80864	6.80864	6.81144	6.81812	6.82608	6.83276	6.83556	6.83556	6.83556	6.83556	6.83556	6.83556	6.83556	6.83556	6.83556	6.83556	6.83556	6.83556	6.83556	6.83556	6.83556	6.83556	6.83835	6.84503	6.85299	6.85967	6.86247
51	Anonymous participant OD 51			6.90912	6.90912	6.90912	6.90912	6.90912	6.90912	6.90912	6.90912	6.90912	6.90912	6.90912	6.91181	6.91823	6.92589	6.9323	6.935	6.935	6.935	6.935	6.935	6.935	6.935	6.935	6.935	6.935	6.935	6.935	6.935	6.935	6.935	6.935	6.935	6.935	6.935	6.935	6.935	6.935	6.935	6.935	6.935	6.935	6.935	6.935	6.935	6.935	6.935
52	Anonymous participant OD 52			6.25422	6.25422	6.25422	6.25422	6.25422	6.25422	6.25422	6.25422	6.25422	6.25422	6.25422	6.25422	6.25422	6.25422	6.25422	6.25422	6.25422	6.25422	6.25422	6.25422	6.25422	6.25422	6.25422	6.25422	6.25422	6.25422	6.25422	6.25422	6.25422	6.25422	6.25422	6.25422	6.25422	6.25422	6.25422	6.25422	6.25422	6.25422	6.25422	6.25422	6.25422	6.25422	6.25422	6.25422	6.25422	6.25422
53	Anonymous participant OD 53			6.99707	6.99707	6.99707	6.99707	6.99707	6.99707	6.99707	6.99707	6.99707	6.99707	6.99707	6.99707	6.99707	6.99707	6.99707	6.99707	6.99707	6.99707	6.99707	6.99707	6.99707	6.99707	6.99707	6.99707	6.99707	6.99707	6.99707	6.99707	6.99707	6.99707	6.99707	6.99707	6.99707	6.99707	6.99707	6.99707	6.99707	6.99707	6.99707	6.99707	6.99707	6.99707	6.99707	6.99707	6.99707	6.99707
54	Anonymous participant OD 54			6.98453	6.98453	6.98453	6.98453	6.98453	6.98453	6.98453	6.98453	6.98453	6.98453	6.98453	6.98453	6.98453	6.98453	6.98453	6.98453	6.98453	6.98453	6.98453	6.98453	6.98453	6.98453	6.98453	6.98453	6.98453	6.98453	6.98453	6.98453	6.98453	6.98453	6.98453	6.98453	6.98453	6.98453	6.98453	6.98453	6.98453	6.98453	6.98453	6.98453	6.98453	6.98453	6.98453	6.98453	6.98453	6.98453
55	Anonymous participant OD 55			6.98464	6.98464	6.98464	6.98464	6.98464	6.98464	6.98464	6.98464	6.98464	6.98464	6.98464	6.98464	6.98464	6.98464	6.98464	6.98464	6.98464	6.98464	6.98464	6.98464	6.98464	6.98464	6.98464	6.98464	6.98464	6.98464	6.98464	6.98464	6.98464	6.98464	6.98464	6.98464	6.98464	6.98464	6.98464	6.98464	6.98464	6.98464	6.98464	6.98464	6.98464	6.98464	6.98464	6.98464	6.98464	6.98464
56	Anonymous participant OD 56			6.34772	6.34772	6.34772	6.34772	6.34772	6.34772	6.34772	6.34772	6.34772	6.34772	6.34772	6.34772	6.34772	6.34772	6.34772	6.34772	6.34772	6.34772	6.34772	6.34772	6.34772	6.34772	6.34772	6.34772	6.34772	6.34772	6.34772	6.34772	6.34772	6.34772	6.34772	6.34772	6.34772	6.34772	6.34772	6.34772	6.34772	6.34772	6.34772	6.34772	6.34772	6.34772	6.34772	6.34772	6.34772	6.34772
57	Anonymous participant OD 57			6.98403	6.98403	6.98403	6.98403	6.98403	6.98403	6.98403	6.98403	6.98403	6.98403	6.98403	6.98403	6.98403	6.98403	6.98403	6.98403	6.98403	6.98403	6.98403	6.98403	6.98403	6.98403	6.98403	6.98403	6.98403	6.98403	6.98403	6.98403	6.98403	6.98403	6.98403	6.98403	6.98403	6.98403	6.98403	6.98403	6.98403	6.98403	6.98403	6.98403	6.98403	6.98403	6.98403	6.98403	6.98403	6.98403
58	Anonymous participant OD 58			6.82536	6.82276	6.81656	6.80916	6.80296	6.80036	6.80036	6.80036	6.80036	6.80036	6.80036	6.80036	6.80036	6.80036	6.80036	6.80036	6.80036	6.80036	6.80036	6.80036	6.80036	6.80036	6.80036	6.80036	6.80036	6.80036	6.80036	6.80036	6.80036	6.80036	6.80036	6.79776	6.79156	6.78416	6.77796	6.77536	6.77536	6.77536	6.77536	6.77536	6.77536	6.77536	6.77536	6.77536	6.77536	6.77536
59	Anonymous participant OD 59			6.34772	6.34772	6.34772	6.34772	6.34772	6.34772	6.34772	6.34772	6.34772	6.34772	6.34772	6.34772	6.34772	6.34772	6.34772	6.34772	6.34772	6.34772	6.34772	6.34772	6.34772	6.34772	6.34772	6.34772	6.34772	6.34772	6.34772	6.34772	6.34772	6.34772	6.34772	6.34772	6.34772	6.34772	6.34772	6.34772	6.34772	6.34772	6.34772	6.34772	6.34772	6.34772	6.34772	6.34772	6.34772	6.34772
60	Anonymous participant OD 60			6.9869	6.9869	6.9869	6.9869	6.9869	6.9869	6.9869	6.9869	6.9869	6.9869	6.9869	6.9869	6.9869	6.9869	6.9869	6.9869	6.9869	6.9869	6.9869	6.9869	6.9869	6.9869	6.9869	6.9869	6.9869	6.9869	6.9869	6.9869	6.9869	6.9869	6.9869	6.9869	6.9869	6.9869	6.9869	6.9869	6.9869	6.9869	6.9869	6.9869	6.9869	6.9869	6.9869	6.9869	6.9869	6.9869
61	Anonymous participant OD 61			6.65078	6.65078	6.65078	6.65078	6.65078	6.65078	6.65078	6.65078	6.65078	6.65078	6.65078	6.65078	6.65078	6.65078	6.65078	6.65078	6.65078	6.65078	6.65078	6.65078	6.65078	6.65078	6.65078	6.65078	6.65078	6.65078	6.65078	6.65078	6.65078	6.65078	6.65078	6.65078	6.65078	6.65078	6.65078	6.65078	6.65078	6.65078	6.65078	6.65078	6.65078	6.65078	6.65078	6.65078	6.65078	6.65078
62	Anonymous participant OD 62			6.99672	6.99672	6.99672	6.99672	6.99672	6.99672	6.99672	6.99672	6.99672	6.99672	6.99672	6.99672	6.99672	6.99672	6.99672	6.99672	6.99672	6.99672	6.99672	6.99672	6.99672	6.99672	6.99672	6.99672	6.99672	6.99672	6.99672	6.99672	6.99672	6.99672	6.99672	6.99672	6.99672	6.99672	6.99672	6.99672	6.99672	6.99672	6.99672	6.99672	6.99672	6.99672	6.99672	6.99672	6.99672	6.99672
63	Anonymous participant OD 63			6.80387	6.80126	6.79506	6.78766	6.78145	6.77885	6.77885	6.77885	6.77885	6.77885	6.77885	6.77885	6.77885	6.77885	6.77885	6.77885	6.77885	6.77885	6.77885	6.77885	6.77885	6.77885	6.77885	6.77885	6.77885	6.77885	6.77625	6.77005	6.76264	6.75644	6.75384	6.75384	6.75384	6.75384	6.75384	6.75384	6.75384	6.75384	6.75384	6.75384	6.75384	6.75384	6.75384	6.75384	6.75384	6.75384
64	Anonymous participant OD 64			6.97524	6.97524	6.97524	6.97524	6.97524	6.97524	6.97524	6.97524	6.97524	6.97524	6.97524	6.97524	6.97524	6.97524	6.97524	6.97524	6.97524	6.97524	6.97524	6.97524	6.97524	6.97524	6.97524	6.97524	6.97524	6.97524	6.97524	6.97524	6.97524	6.97524	6.97524	6.97524	6.97524	6.97524	6.97524	6.97524	6.97524	6.97524	6.97524	6.97524	6.97524	6.97524	6.97524	6.97524	6.97524	6.97524
65	Anonymous participant OD 65			6.88802	6.88802	6.88802	6.88802	6.88802	6.88802	6.88802	6.88802	6.88802	6.88802	6.88802	6.88802	6.88802	6.88802	6.88802	6.88802	6.88802	6.88802	6.88802	6.88802	6.88802	6.88802	6.88802	6.88802	6.88802	6.88802	6.88802	6.88802	6.88802	6.88802	6.88802	6.8881	6.88833	6.88872	6.88924	6.88991	6.89071	6.89164	6.8927	6.89387	6.89515	6.89654	6.89804	6.89962	6.9013	6.90307
66	Anonymous participant OD 66			6.97568	6.97568	6.97568	6.97568	6.97568	6.97568	6.97568	6.97568	6.97568	6.97568	6.97568	6.97568	6.97568	6.97568	6.97568	6.97568	6.97568	6.97568	6.97568	6.97568	6.97568	6.97568	6.97568	6.97568	6.97568	6.97568	6.97568	6.97568	6.97568	6.97568	6.97568	6.97568	6.97568	6.97568	6.97568	6.97568	6.97568	6.97568	6.97568	6.97568	6.97568	6.97568	6.97568	6.97568	6.97568	6.97568
67	Anonymous participant OD 67			6.99589	6.99589	6.99589	6.99589	6.99589	6.99589	6.99589	6.99589	6.99589	6.99589	6.99589	6.99589	6.99589	6.99589	6.99589	6.99589	6.99589	6.99589	6.99589	6.99589	6.99589	6.99589	6.99589	6.99589	6.99589	6.99589	6.99589	6.99589	6.99589	6.99589	6.99589	6.99589	6.99589	6.99589	6.99589	6.99589	6.99589	6.99589	6.99589	6.99589	6.99589	6.99589	6.99589	6.99589	6.99589	6.99589
68	Anonymous participant OD 68			6.99418	6.99418	6.99418	6.99418	6.99418	6.99418	6.99418	6.99418	6.99418	6.99418	6.99418	6.99418	6.99418	6.99418	6.99418	6.99418	6.99418	6.99418	6.99418	6.99418	6.99418	6.99418	6.99418	6.99418	6.99418	6.99418	6.99418	6.99418	6.99418	6.99418	6.99418	6.99418	6.99418	6.99418	6.99418	6.99418	6.99418	6.99418	6.99418	6.99418	6.99418	6.99418	6.99418	6.99418	6.99418	6.99418
69	Anonymous participant OD 69			6.39406	6.39406	6.39406	6.39406	6.39406	6.39406	6.39689	6.40364	6.41169	6.41844	6.42127	6.42127	6.42127	6.42127	6.42127	6.42127	6.42127	6.42127	6.42127	6.42127	6.42127	6.42127	6.42127	6.42127	6.42127	6.42127	6.42127	6.42127	6.42127	6.42127	6.42127	6.42127	6.42127	6.42127	6.42127	6.42127	6.42127	6.42127	6.42127	6.42127	6.42127	6.42127	6.42127	6.42127	6.42127	6.42127
70	Anonymous participant OD 70			6.98874	6.98874	6.98874	6.98874	6.98874	6.98874	6.98874	6.98874	6.98874	6.98874	6.98874	6.98874	6.98874	6.98874	6.98874	6.98874	6.98874	6.98874	6.98874	6.98874	6.98874	6.98874	6.98874	6.98874	6.98874	6.98874	6.98874	6.98874	6.98874	6.98874	6.98874	6.98874	6.98874	6.98874	6.98874	6.98874	6.98874	6.98874	6.98874	6.98874	6.98874	6.98874	6.98874	6.98874	6.98874	6.98874
71	Anonymous participant OD 71			6.97903	6.97903	6.97903	6.97903	6.97903	6.97903	6.97903	6.97903	6.97903	6.97903	6.97903	6.97903	6.97903	6.97903	6.97903	6.97903	6.97903	6.97903	6.97903	6.97903	6.97903	6.97903	6.97903	6.97903	6.97903	6.97903	6.97903	6.97903	6.97903	6.97903	6.97903	6.97903	6.97903	6.97903	6.97903	6.97903	6.97903	6.97903	6.97903	6.97903	6.97903	6.97903	6.97903	6.97903	6.97903	6.97903
72	Anonymous participant OD 72			6.96664	6.96664	6.96664	6.96664	6.96664	6.96664	6.96664	6.96664	6.96664	6.96664	6.96664	6.96405	6.95788	6.95052	6.94435	6.94176	6.94176	6.94176	6.94176	6.94176	6.94176	6.94176	6.94176	6.94176	6.94176	6.94176	6.94176	6.94176	6.94176	6.94176	6.94176	6.94176	6.94176	6.94176	6.94176	6.94176	6.94176	6.94176	6.94176	6.94176	6.94176	6.94176	6.94176	6.94176	6.94176	6.94176
73	Anonymous participant OD 73			6.9869	6.9869	6.9869	6.9869	6.9869	6.9869	6.9869	6.9869	6.9869	6.9869	6.9869	6.9869	6.9869	6.9869	6.9869	6.9869	6.9869	6.9869	6.9869	6.9869	6.9869	6.9869	6.9869	6.9869	6.9869	6.9869	6.9869	6.9869	6.9869	6.9869	6.9869	6.9869	6.9869	6.9869	6.9869	6.9869	6.9869	6.9869	6.9869	6.9869	6.9869	6.9869	6.9869	6.9869	6.9869	6.9869
74	Anonymous participant OD 74			6.98606	6.98606	6.98606	6.98606	6.98606	6.98606	6.98606	6.98606	6.98606	6.98606	6.98606	6.98606	6.98606	6.98606	6.98606	6.98606	6.98606	6.98606	6.98606	6.98606	6.98606	6.98606	6.98606	6.98606	6.98606	6.98606	6.98606	6.98606	6.98606	6.98606	6.98606	6.98606	6.98606	6.98606	6.98606	6.98606	6.98606	6.98606	6.98606	6.98606	6.98606	6.98606	6.98606	6.98606	6.98606	6.98606
75	Anonymous participant OD 75			6.99548	6.99548	6.99548	6.99548	6.99548	6.99548	6.99548	6.99548	6.99548	6.99548	6.99548	6.99548	6.99548	6.99548	6.99548	6.99548	6.99548	6.99548	6.99548	6.99548	6.99548	6.99548	6.99548	6.99548	6.99548	6.99548	6.99548	6.99548	6.99548	6.99548	6.99548	6.99548	6.99548	6.99548	6.99548	6.99548	6.99548	6.99548	6.99548	6.99548	6.99548	6.99548	6.99548	6.99548	6.99548	6.99548
76	Anonymous participant OD 76			6.97384	6.97384	6.97384	6.97384	6.97384	6.97384	6.97384	6.97384	6.97384	6.97384	6.97384	6.97384	6.97384	6.97384	6.97384	6.97384	6.97384	6.97384	6.97384	6.97384	6.97384	6.97384	6.97384	6.97384	6.97384	6.97384	6.97384	6.97384	6.97384	6.97384	6.97384	6.97384	6.97384	6.97384	6.97384	6.97384	6.97384	6.97384	6.97384	6.97384	6.97384	6.97384	6.97384	6.97384	6.97384	6.97384
77	Anonymous participant OD 77			6.65078	6.65078	6.65078	6.65078	6.65078	6.65078	6.65078	6.65078	6.65078	6.65078	6.65078	6.65078	6.65078	6.65078	6.65078	6.65078	6.65078	6.65078	6.65078	6.65078	6.65078	6.65078	6.65078	6.65078	6.65078	6.65078	6.65078	6.65078	6.65078	6.65078	6.65078	6.65078	6.65078	6.65078	6.65078	6.65078	6.65078	6.65078	6.65078	6.65078	6.65078	6.65078	6.65078	6.65078	6.65078	6.65078
78	Anonymous participant OD 78			6.94836	6.94836	6.94836	6.94836	6.94836	6.94836	6.94836	6.94836	6.94836	6.94836	6.94836	6.95107	6.95752	6.96522	6.97168	6.97438	6.97438	6.97438	6.97438	6.97438	6.97438	6.97438	6.97438	6.97438	6.97438	6.97438	6.97438	6.97438	6.97438	6.97438	6.97438	6.97438	6.97438	6.97438	6.97438	6.97438	6.97438	6.97438	6.97438	6.97438	6.97438	6.97438	6.97438	6.97438	6.97438	6.97438
79	Anonymous participant OD 79			6.97903	6.97903	6.97903	6.97903	6.97903	6.97903	6.97903	6.97903	6.97903	6.97903	6.97903	6.97903	6.97903	6.97903	6.97903	6.97903	6.97903	6.97903	6.97903	6.97903	6.97903	6.97903	6.97903	6.97903	6.97903	6.97903	6.97903	6.97903	6.97903	6.97903	6.97903	6.97903	6.97903	6.97903	6.97903	6.97903	6.97903	6.97903	6.97903	6.97903	6.97903	6.97903	6.97903	6.97903	6.97903	6.97903
80	Anonymous participant OD 80			6.99132	6.99132	6.99132	6.99132	6.99132	6.99132	6.99132	6.99132	6.99132	6.99132	6.99132	6.99132	6.99132	6.99132	6.99132	6.99132	6.99132	6.99132	6.99132	6.99132	6.99132	6.99132	6.99132	6.99132	6.99132	6.99132	6.99132	6.99132	6.99132	6.99132	6.99132	6.99132	6.99132	6.99132	6.99132	6.99132	6.99132	6.99132	6.99132	6.99132	6.99132	6.99132	6.99132	6.99132	6.99132	6.99132
81	Anonymous participant OD 81			6.12872	6.14402	6.18107	6.22659	6.26733	6.29	6.2987	6.3061	6.31184	6.31556	6.31688	6.31688	6.31688	6.31688	6.31688	6.31688	6.31688	6.31688	6.31688	6.31688	6.31688	6.31688	6.31688	6.31688	6.31688	6.31688	6.31968	6.32634	6.3343	6.34097	6.34376	6.34376	6.34376	6.34376	6.34376	6.34376	6.34376	6.34376	6.34376	6.34376	6.34376	6.34376	6.34376	6.34376	6.34376	6.34376
82	Anonymous participant OD 82			6.12872	6.14402	6.18107	6.22659	6.26733	6.29	6.2987	6.3061	6.31184	6.31556	6.31688	6.31688	6.31688	6.31688	6.31688	6.31688	6.31688	6.31688	6.31688	6.31688	6.31688	6.31688	6.31688	6.31688	6.31688	6.31688	6.31968	6.32634	6.3343	6.34097	6.34376	6.34376	6.34376	6.34376	6.34376	6.34376	6.34376	6.34376	6.34376	6.34376	6.34376	6.34376	6.34376	6.34376	6.34376	6.34376
83	Anonymous participant OD 83			5.923	5.923	5.923	5.923	5.923	5.923	5.923	5.923	5.923	5.923	5.923	5.92558	5.93172	5.93906	5.9452	5.94778	5.94778	5.94778	5.94778	5.94778	5.94778	5.94778	5.94778	5.94778	5.94778	5.94778	5.94778	5.94778	5.94778	5.94778	5.94778	5.95036	5.9565	5.96384	5.96999	5.97256	5.97256	5.97256	5.97256	5.97256	5.97256	5.97256	5.97256	5.97256	5.97256	5.97256
84	Anonymous participant OD 84			6.9861	6.9861	6.9861	6.9861	6.9861	6.9861	6.9861	6.9861	6.9861	6.9861	6.9861	6.9861	6.9861	6.9861	6.9861	6.9861	6.9861	6.9861	6.9861	6.9861	6.9861	6.9861	6.9861	6.9861	6.9861	6.9861	6.9861	6.9861	6.9861	6.9861	6.9861	6.9861	6.9861	6.9861	6.9861	6.9861	6.9861	6.9861	6.9861	6.9861	6.9861	6.9861	6.9861	6.9861	6.9861	6.9861
85	Anonymous participant OD 85			6.98837	6.98837	6.98837	6.98837	6.98837	6.98837	6.98837	6.98837	6.98837	6.98837	6.98837	6.98837	6.98837	6.98837	6.98837	6.98837	6.98837	6.98837	6.98837	6.98837	6.98837	6.98837	6.98837	6.98837	6.98837	6.98837	6.98837	6.98837	6.98837	6.98837	6.98837	6.98837	6.98837	6.98837	6.98837	6.98837	6.98837	6.98837	6.98837	6.98837	6.98837	6.98837	6.98837	6.98837	6.98837	6.98837
86	Anonymous participant OD 86			6.99427	6.99427	6.99427	6.99427	6.99427	6.99427	6.99427	6.99427	6.99427	6.99427	6.99427	6.99427	6.99427	6.99427	6.99427	6.99427	6.99427	6.99427	6.99427	6.99427	6.99427	6.99427	6.99427	6.99427	6.99427	6.99427	6.99427	6.99427	6.99427	6.99427	6.99427	6.99427	6.99427	6.99427	6.99427	6.99427	6.99427	6.99427	6.99427	6.99427	6.99427	6.99427	6.99427	6.99427	6.99427	6.99427
87	Anonymous participant OD 87			6.98318	6.98318	6.98318	6.98318	6.98318	6.98318	6.98318	6.98318	6.98318	6.98318	6.98318	6.98318	6.98318	6.98318	6.98318	6.98318	6.98318	6.98318	6.98318	6.98318	6.98318	6.98318	6.98318	6.98318	6.98318	6.98318	6.98318	6.98318	6.98318	6.98318	6.98318	6.98318	6.98318	6.98318	6.98318	6.98318	6.98318	6.98318	6.98318	6.98318	6.98318	6.98318	6.98318	6.98318	6.98318	6.98318
88	Anonymous participant OD 88			6.99005	6.99005	6.99005	6.99005	6.99005	6.99005	6.99005	6.99005	6.99005	6.99005	6.99005	6.99005	6.99005	6.99005	6.99005	6.99005	6.99005	6.99005	6.99005	6.99005	6.99005	6.99005	6.99005	6.99005	6.99005	6.99005	6.99005	6.99005	6.99005	6.99005	6.99005	6.99005	6.99005	6.99005	6.99005	6.99005	6.99005	6.99005	6.99005	6.99005	6.99005	6.99005	6.99005	6.99005	6.99005	6.99005
	mean			6.80691	6.80722	6.80798	6.80893	6.80977	6.81025	6.81052	6.81088	6.81125	6.81156	6.81173	6.81189	6.8122	6.81257	6.8129	6.81312	6.81318	6.81314	6.81307	6.81301	6.81305	6.81308	6.81301	6.81292	6.81288	6.81296	6.81319	6.81352	6.81387	6.81418	6.81436	6.81444	6.81449	6.81449	6.81443	6.8143	6.81418	6.81412	6.81409	6.81404	6.81392	6.81381	6.81378	6.81383	6.81392	6.81403
	std			0.290831	0.289905	0.287735	0.285204	0.283069	0.281938	0.281468	0.280991	0.28057	0.280251	0.280072	0.279648	0.278778	0.277767	0.276904	0.276457	0.276407	0.276504	0.276671	0.276815	0.276832	0.276701	0.276502	0.276271	0.276031	0.275788	0.275407	0.27485	0.274268	0.273803	0.273588	0.273371	0.272938	0.272475	0.272157	0.272151	0.272369	0.272623	0.272919	0.27325	0.273604	0.273905	0.274109	0.27424	0.274314	0.274345
	min			5.89515	5.89781	5.90417	5.91176	5.91811	5.92078	5.92078	5.92078	5.92078	5.92078	5.92078	5.92345	5.9298	5.93739	5.94375	5.94641	5.94641	5.94641	5.94641	5.94641	5.94641	5.94778	5.94778	5.94778	5.94778	5.94778	5.94778	5.94778	5.94778	5.94778	5.94778	5.95036	5.9565	5.96384	5.96999	5.97256	5.97256	5.97256	5.97256	5.97256	5.97256	5.97256	5.97256	5.97256	5.97256	5.97256
	max			6.99707	6.99707	6.99707	6.99707	6.99707	6.99707	6.99707	6.99707	6.99707	6.99707	6.99707	6.99707	6.99707	6.99707	6.99707	6.99707	6.99707	6.99707	6.99707	6.99707	6.99707	6.99707	6.99707	6.99707	6.99707	6.99707	6.99707	6.99707	6.99707	6.99707	6.99707	6.99707	6.99707	6.99707	6.99707	6.99707	6.99707	6.99707	6.99707	6.99707	6.99707	6.99707	6.99707	6.99707	6.99707	6.99707
[truncated: 315 more columns]

## Sheet: OD_Rw
Radius of White-to-white edges (mm) (Right eyes)
count	Name		Angle (degree)	0	1	2	3	4	5	6	7	8	9	10	11	12	13	14	15	16	17	18	19	20	21	22	23	24	25	26	27	28	29	30	31	32	33	34	35	36	37	38	39	40	41	42	43	44	45
				Rw	Rw	Rw	Rw	Rw	Rw	Rw	Rw	Rw	Rw	Rw	Rw	Rw	Rw	Rw	Rw	Rw	Rw	Rw	Rw	Rw	Rw	Rw	Rw	Rw	Rw	Rw	Rw	Rw	Rw	Rw	Rw	Rw	Rw	Rw	Rw	Rw	Rw	Rw	Rw	Rw	Rw	Rw	Rw	Rw	Rw
1	Anonymous participant OD 1			5.56598	5.56132	5.5564	5.55065	5.54447	5.5383	5.53253	5.52761	5.52393	5.52193	5.52223	5.52596	5.53263	5.54152	5.55195	5.5632	5.57458	5.58537	5.59488	5.6024	5.60723	5.60868	5.60809	5.6067	5.60472	5.60235	5.59935	5.59364	5.58526	5.57456	5.56192	5.5477	5.53226	5.51597	5.4992	5.48231	5.46566	5.44963	5.43457	5.42085	5.40884	5.39889	5.38955	5.38014	5.37249	5.3684
2	Anonymous participant OD 2			5.88141	5.88026	5.87349	5.86293	5.8512	5.84091	5.83431	5.8267	5.81012	5.78697	5.76153	5.73808	5.72091	5.71214	5.7056	5.7002	5.69563	5.69156	5.68767	5.68362	5.67911	5.67437	5.67004	5.66598	5.66198	5.65788	5.65351	5.64867	5.64319	5.6369	5.62962	5.61831	5.60167	5.58246	5.56345	5.54741	5.5371	5.53133	5.52716	5.52337	5.51871	5.51179	5.50113	5.48883	5.47686	5.46382
3	Anonymous participant OD 3			6.06836	6.06466	6.06165	6.05954	6.05853	6.06229	6.07568	6.08854	6.09423	6.09864	6.10155	6.10158	6.09306	6.07498	6.05629	6.03821	6.02017	6.00671	6.00148	5.99866	5.99618	5.99406	5.99227	5.99081	5.98968	5.98888	5.98839	5.98821	5.99662	6.01574	6.03394	6.04161	6.01225	5.99029	5.97483	5.9616	5.95105	5.94363	5.93939	5.93609	5.93293	5.93012	5.92716	5.92355	5.91878	5.90919
4	Anonymous participant OD 4			5.4557	5.45206	5.44826	5.44419	5.43977	5.43491	5.42952	5.42352	5.41681	5.40805	5.39285	5.37451	5.35729	5.34543	5.3418	5.34004	5.33886	5.33839	5.34504	5.35952	5.37074	5.3811	5.3933	5.40891	5.41092	5.39243	5.37589	5.36927	5.36613	5.36848	5.37354	5.38122	5.38534	5.37024	5.35285	5.35191	5.35715	5.36538	5.37499	5.38439	5.39197	5.39612	5.39602	5.39378	5.39027	5.38615
5	Anonymous participant OD 5			5.61968	5.61449	5.61038	5.60725	5.60499	5.6035	5.60269	5.60245	5.62585	5.67102	5.72386	5.78959	5.82786	5.82341	5.80866	5.79258	5.78351	5.78042	5.77832	5.77868	5.78351	5.77135	5.76533	5.77469	5.78975	5.80253	5.80706	5.80979	5.81219	5.81428	5.81605	5.81749	5.8186	5.81937	5.8198	5.81966	5.81532	5.80728	5.7979	5.78951	5.78125	5.77262	5.76484	5.75901	5.75373	5.74887
6	Anonymous participant OD 6			5.40797	5.42884	5.44261	5.46035	5.48252	5.48618	5.48513	5.48319	5.48054	5.47734	5.47377	5.47001	5.46623	5.4626	5.45931	5.45652	5.45441	5.45316	5.45292	5.45352	5.45489	5.45706	5.46008	5.46397	5.46876	5.47449	5.48119	5.49041	5.50818	5.4962	5.4777	5.46483	5.4659	5.47411	5.48516	5.49526	5.50059	5.50073	5.50066	5.50055	5.50037	5.49723	5.48368	5.47011	5.46752	5.47207
7	Anonymous participant OD 7			5.58382	5.58307	5.56652	5.53735	5.50499	5.47892	5.46631	5.45895	5.4516	5.44273	5.43418	5.42658	5.41938	5.41218	5.40439	5.39586	5.38788	5.38181	5.37792	5.3751	5.37238	5.36881	5.36271	5.3483	5.32955	5.3127	5.30395	5.3037	5.30512	5.31035	5.31686	5.32189	5.3225	5.31573	5.30465	5.29352	5.2866	5.28847	5.29666	5.30993	5.32697	5.34621	5.3722	5.37108	5.35654	5.33869
8	Anonymous participant OD 8			5.56616	5.56831	5.5705	5.57267	5.57475	5.57671	5.57846	5.57996	5.58115	5.58197	5.58236	5.57902	5.57013	5.55683	5.53999	5.52081	5.50044	5.48008	5.46089	5.44405	5.43074	5.42214	5.41785	5.41508	5.41239	5.40839	5.3986	5.38014	5.35639	5.33083	5.30688	5.28802	5.27769	5.27562	5.27422	5.27312	5.27237	5.27199	5.27305	5.27862	5.28627	5.29303	5.29591	5.29182	5.28122	5.26646
9	Anonymous participant OD 9			5.63043	5.63033	5.63052	5.61917	5.60473	5.59548	5.58741	5.58277	5.58351	5.58659	5.58969	5.59025	5.58011	5.5624	5.54498	5.5352	5.52926	5.52674	5.52789	5.53081	5.53934	5.56069	5.56894	5.5565	5.54443	5.54477	5.54694	5.54889	5.54909	5.54762	5.545	5.54138	5.53102	5.52233	5.52294	5.52522	5.52727	5.52459	5.5069	5.50283	5.51034	5.52231	5.53495	5.54443	5.54475	5.52542
10	Anonymous participant OD 10			5.44653	5.44682	5.44616	5.44468	5.44244	5.43948	5.43586	5.43162	5.4268	5.42146	5.41564	5.40939	5.40275	5.39579	5.38853	5.38104	5.37335	5.36552	5.3576	5.34962	5.34086	5.33032	5.32091	5.3113	5.30186	5.29297	5.285	5.27832	5.27331	5.27035	5.27075	5.27862	5.29021	5.30479	5.3214	5.33908	5.35686	5.37378	5.38887	5.40118	5.40973	5.41356	5.41356	5.41311	5.41234	5.41128
11	Anonymous participant OD 11			5.05743	5.05701	5.05607	5.05466	5.05281	5.05057	5.04799	5.04512	5.04198	5.03864	5.03513	5.03149	5.02778	5.02403	5.02029	5.01605	5.0111	5.00555	4.99954	4.99318	4.9866	4.97992	4.97259	4.97184	4.97524	4.98048	4.98668	4.99295	4.9984	5.00397	5.01034	5.01698	5.02337	5.02899	5.03332	5.03583	5.03342	5.01202	4.98803	4.98159	4.98149	4.98141	4.98135	4.98131	4.98129	4.98129
12	Anonymous participant OD 12			4.97123	4.99211	5.01462	5.03867	5.06417	5.09103	5.11915	5.14847	5.17887	5.21028	5.2426	5.27575	5.30964	5.34418	5.37928	5.41485	5.4508	5.48704	5.52349	5.56005	5.59664	5.63317	5.66954	5.70568	5.74148	5.77687	5.81175	5.84603	5.87963	5.91246	5.94442	5.97543	6.0054	6.03424	6.06186	6.08817	6.11309	6.13652	6.15838	6.18	6.19764	6.19906	6.19943	6.19492	6.19215	6.19047
13	Anonymous participant OD 13			5.70542	5.71179	5.71771	5.72289	5.72704	5.72985	5.73104	5.72867	5.72105	5.71024	5.69832	5.68742	5.67961	5.67678	5.67608	5.6749	5.67201	5.66767	5.66237	5.65658	5.65076	5.6454	5.64098	5.63796	5.63683	5.63887	5.6437	5.64914	5.65305	5.65345	5.65082	5.64602	5.63976	5.63273	5.62561	5.6191	5.61388	5.61065	5.61018	5.61353	5.61973	5.62728	5.6347	5.64049	5.64316	5.64244
14	Anonymous participant OD 14			5.90412	5.90504	5.90792	5.91388	5.91435	5.90751	5.89691	5.88594	5.87798	5.8753	5.8741	5.87327	5.87229	5.87068	5.86705	5.86145	5.85568	5.85093	5.84661	5.84228	5.83751	5.83185	5.8242	5.82463	5.82548	5.82615	5.82087	5.80418	5.79067	5.78685	5.78719	5.78804	5.78952	5.79859	5.80089	5.80124	5.80555	5.8121	5.81591	5.80462	5.78771	5.77154	5.7638	5.76481	5.7674	5.77027
15	Anonymous participant OD 15			6.03126	6.03437	6.03755	6.04106	6.04513	6.05001	6.05594	6.0634	6.07946	6.07152	6.0571	6.04468	6.04247	6.04157	6.04107	6.04072	6.0403	6.03956	6.03826	6.03099	6.0165	5.99963	5.98273	5.96374	5.94701	5.93048	5.91609	5.90632	5.89978	5.89375	5.88838	5.88381	5.88021	5.87773	5.87653	5.8777	5.88262	5.88733	5.88203	5.87461	5.86983	5.86632	5.8634	5.8604	5.85665	5.85146
16	Anonymous participant OD 16			4.98875	4.98953	4.99236	4.99983	5.01093	5.02423	5.03831	5.05353	5.07204	5.09204	5.11161	5.13026	5.14792	5.1629	5.17835	5.19282	5.20467	5.21226	5.2139	5.20878	5.20122	5.19665	5.1955	5.19464	5.19411	5.19422	5.20377	5.222	5.242	5.25686	5.26608	5.27355	5.2803	5.28737	5.29579	5.30767	5.32006	5.33129	5.34203	5.35151	5.35893	5.36352	5.36517	5.36596	5.3665	5.36725
17	Anonymous participant OD 17			5.74522	5.74735	5.74837	5.74611	5.74038	5.74108	5.75251	5.76435	5.77642	5.78996	5.80392	5.81657	5.82619	5.83106	5.83096	5.8293	5.82655	5.82125	5.80531	5.78621	5.77223	5.759	5.74967	5.75	5.76218	5.77379	5.77227	5.76134	5.75451	5.75501	5.75629	5.75796	5.7606	5.76716	5.7744	5.76748	5.75875	5.75505	5.75388	5.75266	5.74756	5.73105	5.71604	5.71086	5.70794	5.70717
18	Anonymous participant OD 18			5.47852	5.47475	5.47316	5.47707	5.4836	5.49171	5.50119	5.51185	5.5235	5.53891	5.56172	5.58433	5.59863	5.59718	5.58118	5.55803	5.53528	5.52043	5.51902	5.52294	5.52719	5.52831	5.5272	5.52493	5.52173	5.51787	5.51358	5.50911	5.50362	5.49653	5.49108	5.48714	5.4831	5.47738	5.46428	5.44633	5.43148	5.42724	5.42898	5.43061	5.42145	5.40135	5.39029	5.3812	5.37379	5.36921
19	Anonymous participant OD 19			5.62959	5.6284	5.62061	5.60897	5.59722	5.58909	5.59001	5.60512	5.60686	5.60027	5.59307	5.59107	5.59996	5.61611	5.63822	5.65916	5.65713	5.65262	5.64643	5.63044	5.60596	5.58001	5.55961	5.55051	5.54511	5.5411	5.5389	5.53853	5.5399	5.54314	5.5481	5.55464	5.5626	5.57183	5.59447	5.61756	5.62052	5.62761	5.6385	5.65111	5.66333	5.6731	5.68138	5.68879	5.69188	5.68806
20	Anonymous participant OD 20			5.93724	5.93254	5.92856	5.92524	5.92255	5.92042	5.91882	5.9177	5.91699	5.91666	5.91688	5.91866	5.92707	5.9354	5.94219	5.95264	5.96454	5.9728	5.97382	5.97261	5.96179	5.94489	5.9199	5.89361	5.87752	5.86655	5.8557	5.84163	5.83285	5.82689	5.82175	5.81764	5.81475	5.81327	5.8134	5.81411	5.81099	5.80491	5.80197	5.8022	5.80282	5.80379	5.80508	5.80667	5.81009	5.81631
21	Anonymous participant OD 21			5.87842	5.87878	5.87923	5.87978	5.88043	5.88119	5.88206	5.88306	5.89217	5.92548	5.96668	5.99739	6.0017	5.99011	5.97413	5.96216	5.95226	5.94328	5.93761	5.93721	5.93835	5.93667	5.93304	5.92865	5.92282	5.92511	5.93487	5.94727	5.95777	5.96183	5.96038	5.9574	5.9544	5.95286	5.9528	5.95181	5.94902	5.94927	5.94987	5.95082	5.95566	5.95001	5.9352	5.9218	5.91756	5.91699
22	Anonymous participant OD 22			4.78315	4.78384	4.78849	4.79669	4.808	4.82199	4.83824	4.85632	4.8758	4.89625	4.91725	4.93835	4.95914	4.97919	4.99961	5.0225	5.04791	5.08259	5.10485	5.09509	5.08334	5.07526	5.06837	5.06195	5.05525	5.04791	5.04063	5.03227	5.02003	5.0076	5.00003	4.9976	4.99688	4.99661	4.99669	4.99695	5.00119	5.00889	5.01658	5.02651	5.03706	5.04604	5.05125	5.05086	5.04598	5.03892
23	Anonymous participant OD 23			5.19402	5.19535	5.19674	5.19817	5.19962	5.20108	5.20252	5.2039	5.20516	5.20641	5.20773	5.20922	5.21099	5.21312	5.21573	5.21891	5.22275	5.23256	5.26174	5.29171	5.30157	5.30056	5.29845	5.29561	5.29245	5.28934	5.28667	5.28482	5.28421	5.2872	5.28952	5.29132	5.29057	5.28374	5.28113	5.28224	5.28455	5.29015	5.29831	5.30785	5.31825	5.33272	5.34905	5.36382	5.37388	5.38084
24	Anonymous participant OD 24			5.6706	5.6706	5.67059	5.67059	5.67059	5.67059	5.67059	5.67074	5.68463	5.7046	5.70935	5.7051	5.69797	5.68877	5.67409	5.65715	5.63654	5.6222	5.61097	5.60133	5.59288	5.58524	5.57799	5.57043	5.56256	5.55503	5.5485	5.54362	5.54104	5.54248	5.53972	5.53355	5.52583	5.51841	5.51267	5.50829	5.50472	5.50161	5.49933	5.49823	5.49794	5.49746	5.49512	5.49129	5.48704	5.48348
25	Anonymous participant OD 25			5.01499	5.01238	5.01685	5.02564	5.03849	5.05516	5.07537	5.09889	5.12546	5.15481	5.1867	5.22087	5.25707	5.29503	5.33452	5.37527	5.44249	5.47338	5.48798	5.49921	5.50723	5.5122	5.5143	5.51315	5.5081	5.50046	5.49161	5.48293	5.47558	5.46789	5.46006	5.45326	5.44862	5.44611	5.44259	5.43853	5.43481	5.43236	5.43227	5.43666	5.44443	5.45373	5.46274	5.46963	5.47485	5.47933
26	Anonymous participant OD 26			5.58557	5.60092	5.61564	5.62937	5.64172	5.65286	5.66403	5.6742	5.68216	5.68814	5.69424	5.70388	5.71179	5.70993	5.70541	5.6988	5.6911	5.6833	5.67641	5.66935	5.66275	5.65947	5.65853	5.65793	5.65774	5.65775	5.65779	5.65783	5.65786	5.65789	5.64006	5.59957	5.56839	5.53945	5.51353	5.49145	5.47399	5.46197	5.45617	5.45586	5.45625	5.4567	5.45693	5.45595	5.45349	5.45088
27	Anonymous participant OD 27			5.88471	5.8776	5.87107	5.86513	5.8596	5.85451	5.85003	5.84634	5.84364	5.84205	5.8282	5.81385	5.80125	5.79047	5.78207	5.77356	5.75964	5.74625	5.73373	5.72175	5.71054	5.70016	5.69083	5.68373	5.67525	5.66406	5.65149	5.63876	5.62712	5.6178	5.6115	5.60673	5.60225	5.59697	5.59093	5.58443	5.57765	5.57074	5.56387	5.55718	5.55085	5.54502	5.53963	5.53458	5.52977	5.52514
28	Anonymous participant OD 28			5.47927	5.46289	5.44752	5.43361	5.4216	5.41194	5.40507	5.40145	5.40431	5.42565	5.45674	5.48573	5.50079	5.49555	5.47895	5.4639	5.45097	5.43991	5.43139	5.42611	5.42498	5.43697	5.45893	5.48084	5.49265	5.49046	5.47911	5.46674	5.46438	5.46317	5.46189	5.45901	5.44707	5.42645	5.40146	5.37642	5.35566	5.34327	5.3347	5.32796	5.32492	5.3249	5.32489	5.32529	5.33038	5.33548
29	Anonymous participant OD 29			5.70425	5.70279	5.70159	5.70064	5.69991	5.69939	5.69907	5.69893	5.70832	5.71779	5.71603	5.71232	5.7069	5.7	5.69186	5.68272	5.67282	5.66214	5.64482	5.62025	5.59113	5.56014	5.52997	5.50329	5.48279	5.46568	5.44847	5.43141	5.41473	5.39868	5.38351	5.36945	5.35676	5.34567	5.33643	5.32928	5.32447	5.32224	5.32291	5.32649	5.33231	5.33968	5.34791	5.3563	5.36417	5.37123
30	Anonymous participant OD 30			5.68296	5.66798	5.65443	5.64319	5.63515	5.63117	5.63168	5.63497	5.63955	5.64713	5.65977	5.67431	5.6875	5.69614	5.69741	5.69336	5.6855	5.67457	5.66135	5.64659	5.63107	5.61379	5.59031	5.57514	5.56203	5.5506	5.54093	5.5331	5.52711	5.52212	5.5179	5.51448	5.51187	5.5098	5.509	5.50945	5.51033	5.51134	5.51218	5.51257	5.51193	5.51004	5.50737	5.50439	5.50154	5.49931
31	Anonymous participant OD 31			5.83406	5.83362	5.82305	5.8105	5.80412	5.81119	5.80563	5.79346	5.77922	5.76743	5.76259	5.76823	5.77981	5.78988	5.78835	5.76162	5.72899	5.69045	5.66437	5.65789	5.65366	5.65102	5.65019	5.65688	5.6632	5.66415	5.65604	5.64438	5.633	5.61859	5.6052	5.59753	5.60281	5.61153	5.61261	5.6131	5.61439	5.62072	5.60235	5.58154	5.56609	5.55396	5.54331	5.53314	5.52293	5.5141
32	Anonymous participant OD 32			5.01499	5.01238	5.01685	5.02564	5.03849	5.05516	5.07537	5.09889	5.12546	5.15481	5.1867	5.22087	5.25707	5.29503	5.33452	5.37527	5.44249	5.47338	5.48798	5.49921	5.50723	5.5122	5.5143	5.51315	5.5081	5.50046	5.49161	5.48293	5.47558	5.46789	5.46006	5.45326	5.44862	5.44611	5.44259	5.43853	5.43481	5.43236	5.43227	5.43666	5.44443	5.45373	5.46274	5.46963	5.47485	5.47933
33	Anonymous participant OD 33			5.88164	5.88286	5.88813	5.89456	5.89945	5.90054	5.90055	5.90055	5.90055	5.90055	5.90056	5.90056	5.90056	5.87976	5.86614	5.85605	5.84767	5.84068	5.83474	5.82955	5.82476	5.82005	5.81511	5.80959	5.80319	5.79559	5.7874	5.77896	5.77022	5.76116	5.75174	5.74195	5.73176	5.72112	5.71001	5.69841	5.68596	5.67189	5.65673	5.64086	5.62316	5.60414	5.58471	5.56579	5.54829	5.53312
34	Anonymous participant OD 34			6.15768	6.17	6.18214	6.18566	6.18388	6.18209	6.18252	6.18441	6.18653	6.18763	6.17944	6.1605	6.14343	6.13233	6.10784	6.08983	6.07491	6.06339	6.05585	6.05017	6.04058	6.02313	6.00402	5.99062	5.98472	5.98152	5.98026	5.97899	5.97616	5.97122	5.96622	5.96271	5.95918	5.95337	5.93341	5.91218	5.89117	5.87668	5.87292	5.87151	5.87037	5.86835	5.86287	5.85627	5.85308	5.85314
35	Anonymous participant OD 35			5.13896	5.13309	5.12749	5.12221	5.1173	5.11281	5.10878	5.10526	5.1023	5.09994	5.09824	5.09724	5.09765	5.1232	5.16879	5.21117	5.23747	5.25084	5.25424	5.25675	5.25999	5.26292	5.26672	5.27484	5.29365	5.32241	5.35992	5.40501	5.4565	5.51321	5.57396	5.63757	5.70287	5.76867	5.8338	5.89707	5.95731	6.01333	6.06396	6.10802	6.14432	6.1717	6.18896	6.19493	6.19167	6.19091
36	Anonymous participant OD 36			5.13896	5.13309	5.12749	5.12221	5.1173	5.11281	5.10878	5.10526	5.1023	5.09994	5.09824	5.09724	5.09765	5.1232	5.16879	5.21117	5.23747	5.25084	5.25424	5.25675	5.25999	5.26292	5.26672	5.27484	5.29365	5.32241	5.35992	5.40501	5.4565	5.51321	5.57396	5.63757	5.70287	5.76867	5.8338	5.89707	5.95731	6.01333	6.06396	6.10802	6.14432	6.1717	6.18896	6.19493	6.19167	6.19091
37	Anonymous participant OD 37			5.61559	5.60562	5.59844	5.59461	5.59825	5.62319	5.65445	5.67291	5.67447	5.6755	5.67626	5.67678	5.67705	5.67621	5.66151	5.63545	5.60669	5.58386	5.57516	5.57345	5.57247	5.57126	5.56843	5.55345	5.52866	5.50291	5.48457	5.47127	5.46469	5.46153	5.45799	5.4497	5.43513	5.41927	5.40733	5.40049	5.39342	5.3855	5.37721	5.36847	5.35897	5.35044	5.34405	5.33594	5.32688	5.31805
38	Anonymous participant OD 38			5.0007	5.00637	5.01227	5.01817	5.02396	5.02647	5.0264	5.0263	5.02612	5.02581	5.02541	5.02496	5.02451	5.02408	5.02373	5.02349	5.02339	5.04737	5.08433	5.08984	5.08547	5.08189	5.08203	5.08324	5.08526	5.08797	5.09123	5.09491	5.0989	5.10305	5.10956	5.11941	5.13042	5.14036	5.14702	5.14698	5.12605	5.0942	5.0687	5.06351	5.06328	5.0631	5.06298	5.06291	5.06288	5.07033
39	Anonymous participant OD 39			5.59162	5.58759	5.58355	5.57945	5.5752	5.57075	5.56602	5.56094	5.55546	5.54878	5.53947	5.5327	5.53317	5.53889	5.54803	5.55901	5.57025	5.58018	5.58722	5.58979	5.57659	5.54854	5.52017	5.49885	5.47701	5.46122	5.45774	5.45779	5.45789	5.45802	5.45818	5.45836	5.45854	5.45871	5.45886	5.45897	5.45905	5.45861	5.44637	5.43227	5.42299	5.41485	5.40537	5.39489	5.38476	5.37636
40	Anonymous participant OD 40			5.53828	5.53916	5.5409	5.54505	5.55085	5.55721	5.56305	5.5673	5.56888	5.56418	5.55428	5.54453	5.53607	5.52742	5.5182	5.50798	5.49501	5.47688	5.45716	5.43979	5.42871	5.42708	5.43091	5.43861	5.44987	5.46435	5.48174	5.5017	5.52391	5.54805	5.57379	5.6008	5.62877	5.65737	5.68626	5.71514	5.74717	5.79316	5.84819	5.90583	5.95961	6.0031	6.02983	6.03435	6.02402	6.00325
41	Anonymous participant OD 41			4.67167	4.65886	4.64856	4.64124	4.63736	4.63728	4.64033	4.64595	4.65364	4.66288	4.6732	4.68554	4.6984	4.70922	4.7159	4.71996	4.72354	4.72654	4.72887	4.73042	4.73111	4.72512	4.71648	4.70924	4.70628	4.70761	4.71075	4.71513	4.72014	4.72532	4.733	4.74325	4.75489	4.76673	4.77759	4.78628	4.79162	4.79258	4.79063	4.78719	4.78321	4.77965	4.77747	4.77744	4.77925	4.78265
42	Anonymous participant OD 42			6.17873	6.17967	6.18249	6.1872	6.19381	6.19887	6.19868	6.19868	6.19968	6.19958	6.19814	6.19636	6.19636	6.19821	6.19697	6.19761	6.19894	6.19926	6.19737	6.19727	6.19827	6.19802	6.19804	6.19827	6.19841	6.19537	6.19299	6.19256	6.19398	6.19735	6.19792	6.19657	6.19691	6.19976	6.19924	6.19959	6.19904	6.19872	6.19784	6.19677	6.19811	6.19896	6.19943	6.19491	6.19168	6.19031
43	Anonymous participant OD 43			5.4906	5.48735	5.48475	5.48271	5.48114	5.47994	5.47903	5.47831	5.47769	5.47708	5.47638	5.47552	5.47439	5.4729	5.47096	5.46848	5.46507	5.45752	5.44747	5.43488	5.4213	5.4162	5.41272	5.40991	5.40782	5.40648	5.40592	5.40651	5.40763	5.40467	5.39493	5.3837	5.37303	5.37141	5.37209	5.37288	5.37326	5.37255	5.37088	5.3689	5.36725	5.36657	5.36982	5.37243	5.3694	5.36819
44	Anonymous participant OD 44			5.85492	5.84852	5.84141	5.83366	5.82536	5.8166	5.80745	5.798	5.78832	5.77852	5.76866	5.75883	5.74911	5.73959	5.73	5.71961	5.70867	5.69749	5.6864	5.67571	5.66573	5.65677	5.64915	5.64312	5.63835	5.63438	5.63075	5.62703	5.62275	5.61748	5.61045	5.60098	5.58989	5.57809	5.56651	5.55586	5.54529	5.535	5.52557	5.51668	5.50814	5.50002	5.49241	5.48538	5.47828	5.47071
45	Anonymous participant OD 45			5.85492	5.84852	5.84141	5.83366	5.82536	5.8166	5.80745	5.798	5.78832	5.77852	5.76866	5.75883	5.74911	5.73959	5.73	5.71961	5.70867	5.69749	5.6864	5.67571	5.66573	5.65677	5.64915	5.64312	5.63835	5.63438	5.63075	5.62703	5.62275	5.61748	5.61045	5.60098	5.58989	5.57809	5.56651	5.55586	5.54529	5.535	5.52557	5.51668	5.50814	5.50002	5.49241	5.48538	5.47828	5.47071
46	Anonymous participant OD 46			5.77022	5.7696	5.769	5.76823	5.76715	5.76556	5.76162	5.75466	5.74604	5.7371	5.72905	5.72126	5.71323	5.70467	5.69528	5.68346	5.66775	5.65381	5.64747	5.64564	5.64457	5.64331	5.64066	5.63315	5.62681	5.62379	5.62029	5.61326	5.60555	5.60137	5.59864	5.59714	5.59804	5.60132	5.60397	5.60451	5.59358	5.57401	5.55637	5.54852	5.54326	5.53899	5.53558	5.53287	5.53086	5.52926
47	Anonymous participant OD 47			6.17877	6.17968	6.18249	6.18721	6.19385	6.197	6.19642	6.19517	6.19143	6.18589	6.17974	6.1701	6.15902	6.15365	6.15501	6.15838	6.16251	6.16618	6.16816	6.16619	6.1589	6.14939	6.14091	6.1358	6.13202	6.12894	6.1262	6.12345	6.12036	6.11658	6.11176	6.1044	6.09391	6.08255	6.07111	6.06088	6.05434	6.04951	6.04856	6.05054	6.04807	6.04359	6.03907	6.03357	6.0269	6.01968
48	Anonymous participant OD 48			6.08628	6.08148	6.07467	6.06684	6.05618	6.04495	6.03567	6.02649	6.01374	5.9973	5.98294	5.97122	5.96049	5.94942	5.93669	5.91942	5.89367	5.86683	5.84736	5.84194	5.84069	5.83994	5.83908	5.83747	5.83018	5.81604	5.79773	5.77787	5.75913	5.74415	5.73559	5.73521	5.73877	5.74246	5.73606	5.72327	5.71554	5.70962	5.70482	5.70041	5.69568	5.68991	5.68251	5.6739	5.66443	5.65433
49	Anonymous participant OD 49			6.03954	6.03501	6.03008	6.02483	6.01934	6.01366	6.00789	6.00208	5.99551	5.98572	5.97402	5.96209	5.9516	5.94424	5.94168	5.94188	5.94241	5.9432	5.94421	5.94758	5.95354	5.95873	5.95952	5.95218	5.94383	5.93947	5.93799	5.93769	5.93856	5.93479	5.92771	5.92235	5.91757	5.91484	5.91495	5.91666	5.91908	5.92201	5.92703	5.93314	5.93888	5.94281	5.9432	5.93793	5.93374	5.93238
50	Anonymous participant OD 50			6.10992	6.10954	6.10612	6.10233	6.1009	6.1009	6.10091	6.10091	6.10092	6.10093	6.10208	6.10717	6.11126	6.1071	6.10272	6.10397	6.10345	6.0975	6.07902	6.06566	6.06116	6.05853	6.05716	6.05636	6.05526	6.05274	6.05458	6.05824	6.06383	6.07396	6.07993	6.0756	6.0674	6.05505	6.04351	6.03778	6.03453	6.03161	6.02719	6.01473	6.01187	6.01298	6.01475	6.01687	6.01998	6.0245
51	Anonymous participant OD 51			6.17873	6.17967	6.18249	6.1872	6.19381	6.19889	6.19877	6.19843	6.19693	6.19529	6.19339	6.19195	6.19291	6.1981	6.18684	6.18723	6.19189	6.19647	6.19771	6.19729	6.19746	6.19781	6.19809	6.1981	6.19699	6.19515	6.19132	6.18555	6.18349	6.1871	6.19275	6.19263	6.1931	6.1954	6.19876	6.1988	6.19437	6.19027	6.18533	6.17841	6.16135	6.13737	6.11975	6.11411	6.11069	6.1112
52	Anonymous participant OD 52			5.53828	5.53916	5.5409	5.54505	5.55085	5.55721	5.56305	5.5673	5.56888	5.56418	5.55428	5.54453	5.53607	5.52742	5.5182	5.50798	5.49501	5.47688	5.45716	5.43979	5.42871	5.42708	5.43091	5.43861	5.44987	5.46435	5.48174	5.5017	5.52391	5.54805	5.57379	5.6008	5.62877	5.65737	5.68626	5.71514	5.74717	5.79316	5.84819	5.90583	5.95961	6.0031	6.02983	6.03435	6.02402	6.00325
53	Anonymous participant OD 53			5.53977	5.53874	5.54121	5.54435	5.5481	5.55246	5.55741	5.56295	5.56907	5.57692	5.58715	5.59927	5.61279	5.6272	5.64202	5.65674	5.67087	5.68391	5.69555	5.70748	5.71924	5.72967	5.73758	5.74252	5.74627	5.74919	5.75149	5.75338	5.75505	5.75673	5.75862	5.76093	5.76386	5.76763	5.77243	5.7815	5.79974	5.80792	5.81009	5.81134	5.8123	5.81365	5.81605	5.82002	5.82536	5.83178
54	Anonymous participant OD 54			5.4288	5.42241	5.41644	5.41091	5.4058	5.40111	5.39683	5.39297	5.3895	5.38643	5.38376	5.38147	5.37957	5.37804	5.37688	5.3761	5.37567	5.37608	5.38308	5.39397	5.40305	5.40183	5.40063	5.40249	5.40558	5.40968	5.41462	5.4202	5.42621	5.43247	5.43879	5.44496	5.4508	5.4561	5.46068	5.46433	5.46687	5.4681	5.46735	5.4634	5.45705	5.44923	5.44083	5.42723	5.40844	5.38932
55	Anonymous participant OD 55			5.41229	5.41256	5.41275	5.41285	5.41274	5.40629	5.39476	5.38444	5.38161	5.38662	5.39017	5.38756	5.38458	5.38777	5.39655	5.41222	5.41616	5.41503	5.41334	5.41174	5.41092	5.41277	5.41761	5.42219	5.42346	5.42344	5.42339	5.42329	5.42313	5.4229	5.42022	5.40729	5.39742	5.39002	5.38632	5.38414	5.38604	5.38842	5.39075	5.39763	5.40426	5.41065	5.41587	5.41883	5.41865	5.41689
56	Anonymous participant OD 56			5.35588	5.36388	5.37237	5.3813	5.39061	5.40709	5.42988	5.44068	5.43831	5.43247	5.42436	5.41519	5.40615	5.39842	5.38981	5.38169	5.37846	5.38215	5.38101	5.37417	5.36023	5.36071	5.3615	5.36043	5.35707	5.35264	5.34836	5.34548	5.34928	5.36901	5.36869	5.36647	5.36291	5.35825	5.34396	5.31487	5.28846	5.28133	5.28534	5.29334	5.30399	5.31599	5.328	5.34572	5.3534	5.34631
57	Anonymous participant OD 57			5.26935	5.27033	5.27157	5.27302	5.27465	5.27642	5.27829	5.28022	5.28217	5.28411	5.28598	5.28777	5.28942	5.2909	5.29216	5.29325	5.2944	5.29555	5.29662	5.29751	5.29813	5.29839	5.29697	5.29244	5.28544	5.27665	5.26676	5.25644	5.24637	5.23723	5.22969	5.22439	5.2201	5.219	5.22027	5.22278	5.22622	5.23027	5.23464	5.239	5.24305	5.24648	5.24898	5.25081	5.25225	5.25342
58	Anonymous participant OD 58			6.17873	6.17967	6.18249	6.1872	6.19381	6.19913	6.19957	6.19979	6.19988	6.19588	6.18448	6.18373	6.18351	6.18145	6.1766	6.17517	6.17844	6.18367	6.18832	6.18917	6.1737	6.16295	6.15662	6.15204	6.14814	6.14386	6.13814	6.12975	6.10957	6.08562	6.07324	6.06502	6.05854	6.05452	6.05371	6.05519	6.05172	6.03936	6.02744	6.0219	6.01809	6.01303	6.00136	5.98109	5.95664	5.93247
59	Anonymous participant OD 59			5.35588	5.36388	5.37237	5.3813	5.39061	5.40709	5.42988	5.44068	5.43831	5.43247	5.42436	5.41519	5.40615	5.39842	5.38981	5.38169	5.37846	5.38215	5.38101	5.37417	5.36023	5.36071	5.3615	5.36043	5.35707	5.35264	5.34836	5.34548	5.34928	5.36901	5.36869	5.36647	5.36291	5.35825	5.34396	5.31487	5.28846	5.28133	5.28534	5.29334	5.30399	5.31599	5.328	5.34572	5.3534	5.34631
60	Anonymous participant OD 60			6.17877	6.17967	6.18249	6.18723	6.19471	6.197	6.19642	6.19459	6.18659	6.17438	6.16115	6.15007	6.14119	6.13265	6.12338	6.11218	6.0988	6.08521	6.07282	6.06118	6.05005	6.03916	6.02827	6.01715	6.00553	5.99317	5.97984	5.96527	5.94865	5.92781	5.90489	5.88259	5.86355	5.848	5.83288	5.81494	5.79793	5.7821	5.76837	5.75743	5.74832	5.73939	5.72883	5.71571	5.70143	5.68758
61	Anonymous participant OD 61			5.19322	5.18763	5.1797	5.17005	5.15928	5.14802	5.13688	5.1265	5.11675	5.10768	5.10115	5.09657	5.09288	5.08931	5.08507	5.07937	5.07016	5.05416	5.03309	5.00892	4.98363	4.9592	4.93761	4.92018	4.9043	4.88936	4.87528	4.86196	4.8495	4.83896	4.82966	4.82047	4.81027	4.79794	4.78182	4.75454	4.72171	4.69335	4.67388	4.65599	4.64396	4.64178	4.6434	4.64674	4.65171	4.65821
62	Anonymous participant OD 62			5.24609	5.24983	5.25411	5.25898	5.26447	5.27064	5.27752	5.28516	5.29361	5.32722	5.35735	5.34453	5.33901	5.33432	5.33041	5.32723	5.32469	5.32275	5.32135	5.32042	5.31991	5.31975	5.32128	5.32543	5.33137	5.33826	5.34526	5.35153	5.35626	5.35978	5.36275	5.36555	5.36853	5.37207	5.37655	5.38421	5.39524	5.40807	5.42112	5.43279	5.44151	5.4457	5.4452	5.44274	5.43888	5.43412
63	Anonymous participant OD 63			5.65592	5.64162	5.62731	5.61341	5.60036	5.58861	5.57858	5.57072	5.56545	5.56322	5.56884	5.58699	5.61173	5.63755	5.67719	5.718	5.73342	5.7329	5.73156	5.72936	5.72631	5.7202	5.71686	5.71573	5.71507	5.71421	5.71251	5.70962	5.70547	5.70003	5.69063	5.67324	5.65875	5.65423	5.65195	5.65016	5.64762	5.64182	5.63334	5.62987	5.62939	5.62537	5.61879	5.61413	5.61124	5.61001
64	Anonymous participant OD 64			6.17873	6.17967	6.18249	6.18722	6.19383	6.19885	6.19822	6.19689	6.19487	6.19217	6.1852	6.17936	6.1747	6.17071	6.16713	6.16368	6.16008	6.15685	6.15398	6.15099	6.1474	6.14263	6.13377	6.12162	6.10874	6.09768	6.09101	6.08823	6.0859	6.08417	6.08322	6.08336	6.08489	6.08592	6.0807	6.07422	6.07554	6.0789	6.07994	6.07443	6.06976	6.07178	6.07632	6.07998	6.07964	6.07617
65	Anonymous participant OD 65			5.58382	5.58307	5.56652	5.53735	5.50499	5.47892	5.46631	5.45895	5.4516	5.44273	5.43418	5.42658	5.41938	5.41218	5.40439	5.39586	5.38788	5.38181	5.37792	5.3751	5.37238	5.36881	5.36271	5.3483	5.32955	5.3127	5.30395	5.3037	5.30512	5.31035	5.31686	5.32189	5.3225	5.31573	5.30465	5.29352	5.2866	5.28847	5.29666	5.30993	5.32697	5.34621	5.3722	5.37108	5.35654	5.33869
66	Anonymous participant OD 66			5.45904	5.45659	5.45503	5.45443	5.45796	5.46836	5.48259	5.49757	5.51021	5.51742	5.51876	5.51929	5.51979	5.52084	5.52917	5.54567	5.56243	5.58202	5.60387	5.62783	5.65487	5.68693	5.71734	5.73785	5.73911	5.71905	5.68493	5.64431	5.60474	5.5738	5.55904	5.56246	5.576	5.59759	5.62532	5.6573	5.69164	5.72644	5.75982	5.78987	5.81471	5.83244	5.84236	5.85057	5.86705	5.89958
67	Anonymous participant OD 67			5.82942	5.84374	5.85944	5.87616	5.89357	5.91925	5.93946	5.94868	5.93351	5.8994	5.86546	5.85075	5.85128	5.85224	5.85286	5.84131	5.81446	5.79799	5.78694	5.7797	5.77832	5.77809	5.77797	5.778	5.77837	5.77781	5.775	5.77001	5.75908	5.74482	5.73053	5.71948	5.71494	5.71433	5.714	5.71333	5.70416	5.68455	5.67233	5.66663	5.66385	5.66939	5.67047	5.66724	5.6622	5.65536
68	Anonymous participant OD 68			4.70756	4.69745	4.68808	4.67945	4.67156	4.6644	4.65798	4.65228	4.64731	4.64307	4.63954	4.63672	4.63462	4.63322	4.63254	4.63477	4.64883	4.66802	4.68756	4.71152	4.7371	4.76112	4.78213	4.80405	4.81713	4.81755	4.81721	4.81665	4.81589	4.81498	4.81395	4.81284	4.81168	4.81051	4.80937	4.80829	4.80731	4.80646	4.80578	4.8053	4.80507	4.81851	4.82855	4.82348	4.82387	4.82518
69	Anonymous participant OD 69			5.93038	5.91639	5.90249	5.88878	5.87575	5.86392	5.85378	5.84541	5.83713	5.82911	5.82182	5.81576	5.8114	5.80922	5.8108	5.81734	5.82352	5.82376	5.81658	5.80535	5.79158	5.7699	5.74562	5.72552	5.7125	5.70217	5.69295	5.68331	5.67172	5.6568	5.63591	5.61468	5.60571	5.60092	5.59752	5.59494	5.59258	5.58987	5.58622	5.58046	5.57053	5.55993	5.55283	5.55193	5.55208	5.55237
70	Anonymous participant OD 70			6.14938	6.14467	6.14059	6.13737	6.13521	6.13435	6.14523	6.14767	6.14633	6.14422	6.14178	6.13941	6.13754	6.13657	6.13671	6.13751	6.13891	6.14376	6.14649	6.13898	6.13	6.12595	6.1238	6.12168	6.11789	6.10947	6.09944	6.09216	6.09169	6.09713	6.10362	6.10613	6.09472	6.07173	6.04651	6.02837	6.0185	6.00933	5.99593	5.98403	5.97362	5.96472	5.95784	5.9528	5.95102	5.95067
71	Anonymous participant OD 71			5.56625	5.55684	5.55032	5.54726	5.55195	5.55654	5.55614	5.55527	5.55398	5.55229	5.55025	5.5479	5.54527	5.54239	5.53932	5.53593	5.52986	5.52195	5.51436	5.50917	5.50612	5.50311	5.49848	5.49222	5.48502	5.47753	5.46949	5.45976	5.44549	5.4251	5.40424	5.38879	5.37797	5.36824	5.35963	5.3522	5.34597	5.34098	5.33736	5.33489	5.33296	5.3309	5.32807	5.32383	5.31208	5.29437
72	Anonymous participant OD 72			4.78315	4.78384	4.78849	4.79669	4.808	4.82199	4.83824	4.85632	4.8758	4.89625	4.91725	4.93835	4.95914	4.97919	4.99961	5.0225	5.04791	5.08259	5.10485	5.09509	5.08334	5.07526	5.06837	5.06195	5.05525	5.04791	5.04063	5.03227	5.02003	5.0076	5.00003	4.9976	4.99688	4.99661	4.99669	4.99695	5.00119	5.00889	5.01658	5.02651	5.03706	5.04604	5.05125	5.05086	5.04598	5.03892
73	Anonymous participant OD 73			6.17877	6.17967	6.18249	6.18723	6.19471	6.197	6.19642	6.19459	6.18659	6.17438	6.16115	6.15007	6.14119	6.13265	6.12338	6.11218	6.0988	6.08521	6.07282	6.06118	6.05005	6.03916	6.02827	6.01715	6.00553	5.99317	5.97984	5.96527	5.94865	5.92781	5.90489	5.88259	5.86355	5.848	5.83288	5.81494	5.79793	5.7821	5.76837	5.75743	5.74832	5.73939	5.72883	5.71571	5.70143	5.68758
74	Anonymous participant OD 74			5.57368	5.60316	5.64476	5.65744	5.65366	5.64704	5.63866	5.62963	5.61815	5.6006	5.5797	5.55832	5.53933	5.52561	5.52003	5.52472	5.53418	5.54903	5.56615	5.58209	5.59376	5.60408	5.61436	5.62418	5.63315	5.64086	5.64689	5.65086	5.65236	5.63893	5.61934	5.59401	5.56747	5.54466	5.53057	5.52939	5.53699	5.54742	5.55527	5.55872	5.53725	5.52577	5.51693	5.50987	5.50457	5.50099
75	Anonymous participant OD 75			5.32012	5.34013	5.36043	5.38058	5.40014	5.41868	5.43751	5.45858	5.47675	5.48994	5.5012	5.51101	5.51983	5.52797	5.53547	5.54238	5.54874	5.5546	5.55948	5.56321	5.56684	5.57141	5.57799	5.59234	5.61064	5.62493	5.63301	5.63915	5.6446	5.64935	5.65366	5.65786	5.66201	5.66608	5.67227	5.68023	5.68741	5.69434	5.70103	5.70756	5.71397	5.72028	5.72654	5.73278	5.73903	5.74474
76	Anonymous participant OD 76			6.17873	6.17967	6.18248	6.18721	6.19378	6.1951	6.19595	6.19642	6.19659	6.19655	6.19643	6.1963	6.19636	6.19821	6.19697	6.19767	6.19858	6.19822	6.19726	6.19206	6.18424	6.17268	6.16289	6.14872	6.13015	6.12078	6.11487	6.10991	6.10403	6.09611	6.08693	6.07671	6.06561	6.05378	6.03795	6.02121	6.01195	6.00897	6.0067	6.00124	5.98428	5.96196	5.94367	5.93725	5.9346	5.93296
77	Anonymous participant OD 77			5.19322	5.18763	5.1797	5.17005	5.15928	5.14802	5.13688	5.1265	5.11675	5.10768	5.10115	5.09657	5.09288	5.08931	5.08507	5.07937	5.07016	5.05416	5.03309	5.00892	4.98363	4.9592	4.93761	4.92018	4.9043	4.88936	4.87528	4.86196	4.8495	4.83896	4.82966	4.82047	4.81027	4.79794	4.78182	4.75454	4.72171	4.69335	4.67388	4.65599	4.64396	4.64178	4.6434	4.64674	4.65171	4.65821
78	Anonymous participant OD 78			5.86851	5.87841	5.88845	5.89844	5.90813	5.91731	5.92575	5.93325	5.93957	5.94449	5.9478	5.94926	5.94116	5.92913	5.9202	5.91206	5.90571	5.90213	5.90315	5.9122	5.92585	5.93979	5.94973	5.95077	5.93614	5.9166	5.90685	5.9078	5.91013	5.9131	5.91597	5.91798	5.91802	5.91	5.89572	5.87993	5.86326	5.84652	5.83519	5.82778	5.82291	5.82177	5.82168	5.82163	5.82226	5.83045
79	Anonymous participant OD 79			5.56625	5.55684	5.55032	5.54726	5.55195	5.55654	5.55614	5.55527	5.55398	5.55229	5.55025	5.5479	5.54527	5.54239	5.53932	5.53593	5.52986	5.52195	5.51436	5.50917	5.50612	5.50311	5.49848	5.49222	5.48502	5.47753	5.46949	5.45976	5.44549	5.4251	5.40424	5.38879	5.37797	5.36824	5.35963	5.3522	5.34597	5.34098	5.33736	5.33489	5.33296	5.3309	5.32807	5.32383	5.31208	5.29437
80	Anonymous participant OD 80			5.58684	5.59729	5.60842	5.61987	5.63123	5.64213	5.65218	5.66099	5.66818	5.67336	5.67616	5.67675	5.67704	5.67689	5.67461	5.67055	5.66748	5.66651	5.66574	5.66521	5.66495	5.66548	5.66863	5.67371	5.67995	5.6911	5.6999	5.70819	5.71413	5.71556	5.71338	5.71097	5.71401	5.72843	5.74169	5.74353	5.74351	5.74347	5.7434	5.74331	5.74319	5.74303	5.74283	5.74259	5.73889	5.72971
81	Anonymous participant OD 81			5.76891	5.76776	5.76684	5.76617	5.76575	5.76565	5.80002	5.86099	5.89247	5.88786	5.87718	5.86439	5.8535	5.84846	5.84795	5.8479	5.85355	5.86348	5.8718	5.87743	5.88138	5.88153	5.88071	5.87951	5.87665	5.87221	5.86697	5.86169	5.85715	5.85412	5.85368	5.86214	5.87355	5.8766	5.8638	5.85246	5.84321	5.83456	5.82636	5.81847	5.81077	5.80234	5.79786	5.79843	5.79974	5.80174
82	Anonymous participant OD 82			5.76891	5.76776	5.76684	5.76617	5.76575	5.76565	5.80002	5.86099	5.89247	5.88786	5.87718	5.86439	5.8535	5.84846	5.84795	5.8479	5.85355	5.86348	5.8718	5.87743	5.88138	5.88153	5.88071	5.87951	5.87665	5.87221	5.86697	5.86169	5.85715	5.85412	5.85368	5.86214	5.87355	5.8766	5.8638	5.85246	5.84321	5.83456	5.82636	5.81847	5.81077	5.80234	5.79786	5.79843	5.79974	5.80174
83	Anonymous participant OD 83			5.0007	5.00637	5.01227	5.01817	5.02396	5.02647	5.0264	5.0263	5.02612	5.02581	5.02541	5.02496	5.02451	5.02408	5.02373	5.02349	5.02339	5.04737	5.08433	5.08984	5.08547	5.08189	5.08203	5.08324	5.08526	5.08797	5.09123	5.09491	5.0989	5.10305	5.10956	5.11941	5.13042	5.14036	5.14702	5.14698	5.12605	5.0942	5.0687	5.06351	5.06328	5.0631	5.06298	5.06291	5.06288	5.07033
84	Anonymous participant OD 84			5.77842	5.78021	5.78159	5.7825	5.78291	5.7782	5.76969	5.76475	5.76018	5.75387	5.74071	5.71749	5.69802	5.68285	5.67258	5.66421	5.65685	5.65119	5.64798	5.64815	5.65273	5.65945	5.66564	5.66967	5.67315	5.67431	5.66921	5.65827	5.64418	5.62963	5.61731	5.6099	5.6096	5.61346	5.61659	5.60939	5.58866	5.57034	5.55714	5.54633	5.53666	5.52836	5.52195	5.51583	5.50896	5.5016
85	Anonymous participant OD 85			5.58557	5.60092	5.61564	5.62937	5.64172	5.65286	5.66403	5.6742	5.68216	5.68814	5.69424	5.70388	5.71179	5.70993	5.70541	5.6988	5.6911	5.6833	5.67641	5.66935	5.66275	5.65947	5.65853	5.65793	5.65774	5.65775	5.65779	5.65783	5.65786	5.65789	5.64006	5.59957	5.56839	5.53945	5.51353	5.49145	5.47399	5.46197	5.45617	5.45586	5.45625	5.4567	5.45693	5.45595	5.45349	5.45088
86	Anonymous participant OD 86			5.76577	5.76605	5.76636	5.76671	5.7671	5.76754	5.77568	5.78724	5.80044	5.8198	5.83382	5.83632	5.83831	5.83992	5.84118	5.8421	5.84273	5.84307	5.84264	5.82784	5.82413	5.82114	5.81883	5.81715	5.81605	5.81547	5.8163	5.82886	5.8472	5.85988	5.86604	5.87164	5.87652	5.88049	5.88338	5.88503	5.88525	5.88448	5.88413	5.88899	5.89821	5.90747	5.91285	5.91611	5.91857	5.92048
87	Anonymous participant OD 87			6.06376	6.06536	6.06527	6.06497	6.06451	6.06392	6.06181	6.05813	6.05443	6.05223	6.05214	6.05233	6.05256	6.05275	6.05247	6.0479	6.0393	6.02839	6.01692	6.00054	5.99321	5.99032	5.98843	5.98682	5.98484	5.98187	5.979	5.9782	5.99373	6.00163	5.99607	5.98573	5.97344	5.96204	5.95438	5.95306	5.95624	5.96401	5.97473	5.97743	5.97838	5.98	5.98795	5.99405	5.9993	6.00515
88	Anonymous participant OD 88			5.4526	5.45532	5.4582	5.46125	5.46446	5.46784	5.47138	5.47509	5.47896	5.48299	5.48718	5.49331	5.50378	5.51589	5.53207	5.54296	5.54618	5.549	5.55292	5.55733	5.56213	5.56725	5.57257	5.57803	5.58482	5.59112	5.59059	5.5896	5.59009	5.5912	5.59283	5.59488	5.59726	5.6001	5.60605	5.61559	5.62838	5.64407	5.66231	5.68276	5.70508	5.7289	5.75388	5.77968	5.80595	5.83234
	mean			5.60308	5.6032	5.60348	5.6036	5.60423	5.60548	5.60807	5.61112	5.61306	5.6143	5.61479	5.61514	5.61551	5.61542	5.61531	5.6151	5.61429	5.6133	5.61221	5.6097	5.60656	5.60354	5.60074	5.59833	5.59576	5.593	5.59043	5.58835	5.58714	5.58609	5.5842	5.58223	5.58077	5.57964	5.57794	5.57593	5.57391	5.57294	5.57287	5.57422	5.57563	5.57656	5.57681	5.57545	5.57281	5.56981
	std			0.381499	0.381522	0.3813	0.380795	0.380118	0.378993	0.377749	0.376487	0.374227	0.370455	0.366223	0.362745	0.359411	0.355046	0.349737	0.345142	0.340758	0.336456	0.332637	0.33118	0.330572	0.329689	0.328787	0.327715	0.326713	0.325962	0.324931	0.323856	0.323442	0.323265	0.323218	0.322793	0.322219	0.322509	0.323216	0.325503	0.329426	0.333842	0.337864	0.340572	0.342419	0.342557	0.342105	0.341699	0.341343	0.341394
	min			4.67167	4.65886	4.64856	4.64124	4.63736	4.63728	4.64033	4.64595	4.64731	4.64307	4.63954	4.63672	4.63462	4.63322	4.63254	4.63477	4.64883	4.66802	4.68756	4.71152	4.73111	4.72512	4.71648	4.70924	4.70628	4.70761	4.71075	4.71513	4.72014	4.72532	4.733	4.74325	4.75489	4.76673	4.77759	4.75454	4.72171	4.69335	4.67388	4.65599	4.64396	4.64178	4.6434	4.64674	4.65171	4.65821
	max			6.17877	6.17968	6.18249	6.18723	6.19471	6.19913	6.19957	6.19979	6.19988	6.19958	6.19814	6.19636	6.19636	6.19821	6.19697	6.19767	6.19894	6.19926	6.19771	6.19729	6.19827	6.19802	6.19809	6.19827	6.19841	6.19537	6.19299	6.19256	6.19398	6.19735	6.19792	6.19657	6.19691	6.19976	6.19924	6.19959	6.19904	6.19872	6.19784	6.19677	6.19811	6.19906	6.19943	6.19493	6.19215	6.19091
[truncated: 315 more columns]

## Sheet: OD_dw
Limbus-to-limbus – White-to-white mm (Right eyes)
count	Name		Angle (degree)	0	1	2	3	4	5	6	7	8	9	10	11	12	13	14	15	16	17	18	19	20	21	22	23	24	25	26	27	28	29	30	31	32	33	34	35	36	37	38	39	40	41	42	43	44	45
				dw	dw	dw	dw	dw	dw	dw	dw	dw	dw	dw	dw	dw	dw	dw	dw	dw	dw	dw	dw	dw	dw	dw	dw	dw	dw	dw	dw	dw	dw	dw	dw	dw	dw	dw	dw	dw	dw	dw	dw	dw	dw	dw	dw	dw	dw
1	Anonymous participant OD 1			1.17607	1.17891	1.17916	1.17863	1.17811	1.17841	1.17829	1.17652	1.17391	1.17125	1.16913	1.1654	1.15873	1.14983	1.13941	1.12815	1.11414	1.09707	1.08005	1.06625	1.05879	1.05733	1.05792	1.05931	1.06129	1.06366	1.06666	1.07237	1.08076	1.09145	1.10409	1.11476	1.1202	1.12104	1.11791	1.11142	1.10221	1.0909	1.07812	1.06449	1.05065	1.03722	1.02665	1.02061	1.01827	1.01881
2	Anonymous participant OD 2			1.10765	1.1088	1.11556	1.12612	1.13786	1.14815	1.15475	1.16235	1.17893	1.20208	1.22752	1.25097	1.26815	1.27691	1.28346	1.28885	1.29342	1.29749	1.30139	1.30543	1.30994	1.31469	1.31901	1.32308	1.32707	1.33117	1.33555	1.34039	1.34586	1.35215	1.35944	1.37074	1.38739	1.4066	NaN	NaN	NaN	NaN	NaN	NaN	NaN	NaN	NaN	NaN	NaN	NaN
3	Anonymous participant OD 3			0.677175	0.680883	0.683888	0.685995	0.687005	0.683251	0.669859	0.656998	0.651313	0.646896	0.643993	0.646612	0.661468	0.687117	0.712139	0.732882	0.750923	0.764383	0.769606	0.772432	0.774906	0.777035	0.778824	0.780279	0.781407	0.782211	0.782699	0.782875	0.774465	0.755347	0.737147	0.729484	0.758844	0.780801	0.796257	0.809489	0.820043	0.827462	0.831702	0.835003	0.838164	0.840974	0.843934	0.847544	0.852305	0.861897
4	Anonymous participant OD 4			1.52566	1.52929	1.5331	1.53717	1.54159	1.54644	1.55183	1.55784	1.56455	1.5733	1.5885	1.60684	1.62406	1.63592	1.63956	1.64131	1.6425	1.64297	1.63632	1.62183	1.61061	1.60025	1.58805	1.57244	1.57044	1.58892	1.60546	1.61208	1.61523	1.61287	1.60781	1.60013	1.59601	1.61111	1.6285	1.62944	1.6242	1.61597	1.60636	1.59696	1.58938	1.58523	1.58533	1.58757	1.59108	1.5952
5	Anonymous participant OD 5			1.37375	1.37893	1.38304	1.38618	1.38844	1.38992	1.39074	1.39098	1.36758	1.32241	1.26957	1.20384	1.16556	1.17002	1.18477	1.20084	1.20991	1.21301	1.21511	1.21474	1.20991	1.22208	1.2281	1.21873	1.20368	1.19089	1.18636	1.18364	1.18123	1.17914	1.17737	1.17593	1.17483	1.17406	1.17363	1.17376	1.1781	1.18615	1.19553	1.20391	1.21217	1.22081	1.22858	1.23441	1.23969	1.24455
6	Anonymous participant OD 6			1.57305	1.55218	1.53841	1.52067	1.4985	1.49484	1.49589	1.49783	1.50048	1.50368	1.50725	1.50814	1.50508	1.50054	1.49699	1.49691	1.49901	1.50027	1.50051	1.49991	1.49854	1.49636	1.49335	1.48946	1.48467	1.47894	1.47224	1.46302	1.44525	1.45722	1.47573	1.4886	1.48753	1.47931	1.46826	1.45817	1.45284	1.4527	1.45276	1.45288	1.45306	1.45619	1.46974	1.48332	1.48591	1.48136
7	Anonymous participant OD 7			1.30419	1.30495	1.32149	1.35067	1.38302	1.4091	1.42171	1.42907	1.43642	1.44528	1.45384	1.46144	1.46864	1.47584	1.48362	1.49215	1.50014	1.50621	1.51009	1.51292	1.51564	1.5192	1.5253	1.53972	1.55846	1.57532	1.58406	1.58432	1.5829	1.57767	1.57116	1.56621	1.56583	1.57299	1.5846	1.59639	1.60411	1.60317	1.59604	1.58394	1.56819	1.55033	1.52583	1.52855	1.54476	1.56438
8	Anonymous participant OD 8			1.34203	1.33988	1.33769	1.33552	1.33343	1.33148	1.32973	1.32823	1.32704	1.32622	1.32583	1.32917	1.33806	1.35136	1.36819	1.38738	1.40775	1.42811	1.4473	1.46414	1.47744	1.48605	1.49034	1.49311	1.4958	1.4998	1.50959	1.52805	1.5518	1.57736	1.60131	1.62017	1.6305	1.63257	1.63397	1.63506	1.63582	1.6362	1.63513	1.62957	1.62192	1.61516	1.61228	1.61637	1.62697	1.64173
9	Anonymous participant OD 9			1.06576	1.06586	1.06567	1.07702	1.09146	1.10071	1.10878	1.11342	1.11268	1.1096	1.1065	1.10594	1.11608	1.13379	1.15121	1.16099	1.16692	1.16945	1.1683	1.16538	1.15685	1.1355	1.12725	1.13969	1.15176	1.15141	1.14925	1.1473	1.1471	1.14856	1.15119	1.15481	1.16517	1.17386	1.17325	1.17097	1.17144	1.18014	1.20501	1.21509	1.21011	1.19814	1.1855	1.17602	1.1757	1.19503
10	Anonymous participant OD 10			1.54626	1.54597	1.54663	1.54811	1.55035	1.55331	1.55693	1.56117	1.56599	1.57133	1.57715	1.5834	1.59003	1.597	1.60426	1.61175	1.61944	1.62727	1.63519	1.64317	1.65193	1.66247	1.67188	1.68149	1.69092	1.69982	1.70779	1.71447	1.71947	1.72244	1.72204	1.71417	1.70258	1.688	1.67139	1.65371	1.63593	1.61901	1.60392	1.59161	1.58306	1.57923	1.57923	1.57968	1.58045	1.58151
11	Anonymous participant OD 11			1.35969	1.36193	1.36752	1.3752	1.38372	1.39181	1.39917	1.40657	1.41435	1.42288	1.43252	1.44378	1.45668	1.47086	1.48595	1.50213	1.52124	1.5436	1.56693	1.58894	1.60737	1.62325	1.63972	1.64955	1.65515	1.65885	1.66152	1.66406	1.66733	1.67041	1.67261	1.67447	1.6765	1.67922	1.68315	1.68881	NaN	NaN	NaN	NaN	NaN	NaN	NaN	NaN	NaN	NaN
12	Anonymous participant OD 12			NaN	NaN	NaN	NaN	NaN	NaN	NaN	NaN	NaN	NaN	NaN	NaN	NaN	NaN	NaN	NaN	NaN	NaN	NaN	NaN	NaN	NaN	NaN	NaN	NaN	NaN	NaN	NaN	NaN	NaN	NaN	NaN	NaN	NaN	NaN	NaN	NaN	NaN	NaN	NaN	NaN	NaN	NaN	NaN	NaN	NaN
13	Anonymous participant OD 13			1.27178	1.26542	1.2595	1.25432	1.25017	1.24735	1.24616	1.24853	1.25615	1.26697	1.27888	1.28979	1.29759	1.30042	1.30113	1.30231	1.3052	1.30953	1.31483	1.32063	1.32644	1.3318	1.33623	1.33924	1.34038	1.33833	1.33351	1.32806	1.32416	1.32375	1.32639	1.33118	1.33744	1.34448	1.3516	1.35811	1.36332	1.36655	1.36703	1.36368	1.35748	1.34992	1.34251	1.33672	1.33405	1.33477
14	Anonymous participant OD 14			0.77746	0.776537	0.773657	0.7677	0.767229	0.774061	0.784664	0.79564	0.803592	0.806275	0.807474	0.808309	0.809283	0.810899	0.814522	0.820123	0.8259	0.830649	0.834967	0.839293	0.844068	0.846809	0.847492	0.838752	0.830938	0.827356	0.832636	0.849323	0.862836	0.866652	0.86631	0.865465	0.863979	0.854909	0.852607	0.852263	0.847955	0.841404	0.837589	0.848877	0.865788	0.881959	0.889702	0.888689	0.886099	0.883228
15	Anonymous participant OD 15			-0.136115	-0.136552	-0.133378	-0.129298	-0.127013	-0.129227	-0.135157	-0.142623	-0.158684	-0.150744	-0.136322	-0.12123	-0.112673	-0.104181	-0.0973203	-0.0943109	-0.0938887	-0.093149	-0.0918455	-0.0845756	-0.0700894	-0.0513699	-0.0297587	-0.00440687	0.0190839	0.0415652	0.0619028	0.0784394	0.0913297	0.102077	0.109298	0.113862	0.11746	0.119938	0.121142	0.119977	0.115055	0.110343	0.115639	0.123063	0.12784	0.134017	0.143293	0.15388	0.163991	0.17184
16	Anonymous participant OD 16			1.91105	1.91027	1.90744	1.89997	1.88887	1.87557	1.86149	1.84627	1.82776	1.80776	1.78819	1.76954	1.75188	1.7369	1.72145	1.70698	1.69513	1.68754	1.6859	1.69102	1.69858	1.70315	1.7043	1.70516	1.70569	1.70557	1.69603	1.67779	1.6578	1.64294	1.63371	1.62625	1.6195	1.61243	1.60401	1.59213	1.57974	1.56851	1.55777	1.54829	1.54086	1.53628	1.53463	1.53384	1.53329	1.53255
17	Anonymous participant OD 17			1.04532	1.04318	1.04217	1.04443	1.05016	1.04946	1.03802	1.02619	1.01412	1.00057	0.986617	0.973968	0.964348	0.95948	0.959577	0.961232	0.963985	0.969288	0.985224	1.00432	1.01831	1.03154	1.04086	1.04053	1.02836	1.01674	1.01827	1.0292	1.03603	1.03553	1.03425	1.03257	1.02994	1.02338	1.01614	1.02306	1.03179	1.03548	1.03665	1.03788	1.04298	1.05948	1.07449	1.07968	1.0826	1.08336
18	Anonymous participant OD 18			1.50688	1.51065	1.51224	1.50833	1.5018	1.49369	1.48421	1.47355	1.4619	1.44649	1.42369	1.40108	1.38677	1.38822	1.40422	1.42737	1.45013	1.46497	1.46638	1.46246	1.45822	1.45709	1.4582	1.46048	1.46367	1.46753	1.47182	1.47629	1.48178	1.48887	1.49432	1.49826	1.5023	1.50802	1.52112	1.53907	1.55393	1.55816	1.55642	1.5548	1.56395	1.58406	1.59511	1.6042	1.61161	1.61619
19	Anonymous participant OD 19			0.872638	0.873826	0.881615	0.893253	0.905005	0.913134	0.914957	0.906374	0.912427	0.925539	0.93548	0.937483	0.928587	0.912441	0.89033	0.869389	0.871424	0.875929	0.88212	0.898109	0.922589	0.948538	0.968936	0.97804	0.983438	0.987453	0.989652	0.990018	0.988651	0.985409	0.980445	0.973909	0.965951	0.956724	0.93408	0.91099	0.908031	0.900942	0.890049	0.877444	0.865215	0.855454	0.847171	0.839764	0.83667	0.840487
20	Anonymous participant OD 20			1.05108	1.05578	1.05977	1.06308	1.06578	1.0679	1.0695	1.07063	1.07133	1.07166	1.07144	1.06966	1.06125	1.05292	1.04614	1.03568	1.02379	1.01552	1.0145	1.01571	1.02653	1.04343	1.06843	1.09471	1.1108	1.12177	1.13262	1.14669	1.15547	1.16144	1.16657	1.17068	1.17358	1.17505	1.17492	1.17421	1.17733	1.18341	1.18635	1.18612	1.18551	1.18454	1.18324	1.18166	1.17823	1.17202
21	Anonymous participant OD 21			1.06046	1.05932	1.05809	1.05675	1.05532	1.05378	1.05214	1.05038	1.04052	1.00648	0.964569	0.933174	0.92821	0.939169	0.95455	0.965958	0.975339	0.983831	0.989065	0.989079	0.9876	0.989	0.992404	0.996631	1.00236	1.00003	0.990274	0.977871	0.967373	0.963313	0.964769	0.967746	0.970749	0.972284	0.972346	0.973333	0.976125	0.975873	0.975278	0.974325	0.969487	0.97514	0.989947	1.00335	1.00758	1.00816
22	Anonymous participant OD 22			2.18349	2.1828	2.17815	2.16996	2.15865	2.14465	2.1284	2.11032	2.09084	2.07039	2.04939	2.0257	1.99874	1.97133	1.94474	1.91926	1.89385	1.85917	1.83691	1.84667	1.85842	1.8665	1.87339	1.87981	1.88651	1.89385	1.90113	1.90949	1.92173	1.93416	1.94173	1.94416	1.94488	1.94515	1.94507	1.94481	1.94057	1.93287	1.92518	1.91525	1.9047	1.89572	1.89051	1.8909	1.89578	1.90284
23	Anonymous participant OD 23			1.60941	1.60808	1.60669	1.60526	1.60381	1.60235	1.60361	1.60867	1.61509	1.62029	1.62167	1.62018	1.61841	1.61627	1.61367	1.61049	1.60665	1.59684	1.56766	1.53768	1.52782	1.52883	1.53095	1.53378	1.53695	1.54006	1.54273	1.54457	1.54519	1.5422	1.53988	1.53808	1.53883	1.54566	1.54826	1.54715	1.54754	1.54839	1.54791	1.54481	1.53711	1.52264	1.50631	1.49154	1.48148	1.47453
24	Anonymous participant OD 24			1.30748	1.30748	1.30749	1.30749	1.30749	1.30749	1.30749	1.30734	1.29345	1.27348	1.26873	1.27298	1.28011	1.28931	1.30399	1.32093	1.34154	1.35588	1.36711	1.37675	1.38519	1.39284	1.40009	1.40765	1.41552	1.42304	1.42958	1.43446	1.43704	1.4356	1.43836	1.44453	1.45225	1.45967	1.46541	1.46979	1.47336	1.47647	1.47875	1.47985	1.48014	1.48062	1.48296	1.48679	1.49104	1.49459
25	Anonymous participant OD 25			1.34382	1.34643	1.34196	1.33317	1.32031	1.30365	1.28343	1.25991	1.23335	1.204	1.17211	1.13794	1.10174	1.06377	1.02429	0.983539	0.913491	0.875859	0.853215	0.835251	0.824408	0.819433	0.817332	0.818487	0.823533	0.831175	0.840026	0.848703	0.856049	0.863748	0.871571	0.878374	0.883012	0.885523	0.88904	0.893107	0.896819	0.899273	0.899366	0.894974	0.887206	0.877899	0.86889	0.862008	0.856782	0.852298
26	Anonymous participant OD 26			1.4028	1.38745	1.37273	1.359	1.34664	1.33551	1.32434	1.31417	1.3062	1.30023	1.29413	1.28449	1.27657	1.27843	1.28296	1.28956	1.29727	1.30507	1.31196	1.31902	1.32562	1.3289	1.32983	1.33044	1.33063	1.33061	1.33058	1.33054	1.3305	1.33048	1.34831	1.3888	1.41998	1.44892	1.47484	1.49692	1.51437	1.5264	1.5322	1.53251	1.53212	1.53167	1.53144	1.53242	1.53488	1.53749
27	Anonymous participant OD 27			1.09892	1.10604	1.11256	1.11851	1.12403	1.12912	1.1336	1.1373	1.14	1.14158	1.15544	1.16978	1.18239	1.19316	1.20156	1.21007	1.224	1.23739	1.2499	1.26189	1.2731	1.28347	1.29281	1.29991	1.30839	1.31957	1.33215	NaN	NaN	NaN	NaN	NaN	NaN	NaN	NaN	NaN	NaN	NaN	NaN	NaN	NaN	NaN	NaN	NaN	NaN	NaN
28	Anonymous participant OD 28			0.962928	0.979311	0.99468	1.00859	1.0206	1.03026	1.03713	1.04076	1.03789	1.01655	0.985463	0.956472	0.941413	0.946647	0.963249	0.978303	0.991236	1.0023	1.01081	1.01609	1.01722	1.00523	0.983268	0.961365	0.949546	0.951744	0.963087	0.975464	0.977817	0.979028	0.980315	0.980276	0.985268	0.997604	1.01565	1.03777	1.05853	1.07092	1.07949	1.08623	1.08927	1.0893	1.0893	1.0889	1.08381	1.07871
29	Anonymous participant OD 29			1.27798	1.27944	1.28063	1.28159	1.28232	1.28284	1.28316	1.28329	1.2739	1.26444	1.2662	1.26991	1.27533	1.28223	1.29037	1.2995	1.30941	1.32009	1.33741	1.36198	1.3911	1.42209	1.45226	1.47894	1.49944	1.51655	1.53376	1.55082	1.5675	1.58355	1.59872	1.61278	1.62547	1.63656	1.6458	1.65294	1.65775	1.65998	1.65932	1.65574	1.64992	1.64255	1.63432	1.62593	1.61806	1.611
30	Anonymous participant OD 30			1.29739	1.31237	1.32592	1.33715	1.3452	1.34918	1.34867	1.34538	1.3408	1.33322	1.32058	1.30604	1.29284	1.28421	1.28294	1.28698	1.29485	1.30578	1.319	1.33375	1.34928	1.36656	1.39004	1.40521	1.41832	1.42975	1.43942	NaN	NaN	NaN	NaN	NaN	NaN	NaN	NaN	NaN	NaN	NaN	NaN	NaN	NaN	NaN	NaN	NaN	NaN	NaN
31	Anonymous participant OD 31			1.15181	1.15225	1.16282	1.17537	1.18175	1.17468	1.18024	1.1924	1.20664	1.21844	1.22328	1.21764	1.20606	1.19598	1.19752	1.22425	1.25688	1.29542	1.3215	1.32798	1.3322	1.33485	1.33567	1.32899	1.32267	1.32172	1.32983	1.34149	1.35287	1.36728	1.38067	1.38834	1.38306	1.37434	1.37326	1.37277	1.37148	1.36514	1.38352	1.40433	1.41977	1.43191	1.44255	1.45273	1.46294	1.47177
32	Anonymous participant OD 32			1.34382	1.34643	1.34196	1.33317	1.32031	1.30365	1.28343	1.25991	1.23335	1.204	1.17211	1.13794	1.10174	1.06377	1.02429	0.983539	0.913491	0.875859	0.853215	0.835251	0.824408	0.819433	0.817332	0.818487	0.823533	0.831175	0.840026	0.848703	0.856049	0.863748	0.871571	0.878374	0.883012	0.885523	0.88904	0.893107	0.896819	0.899273	0.899366	0.894974	0.887206	0.877899	0.86889	0.862008	0.856782	0.852298
33	Anonymous participant OD 33			1.11315	1.11192	1.10665	1.10022	1.09533	1.09424	1.09424	1.09423	1.09423	1.09423	1.09423	1.09423	1.09423	1.11502	1.12864	1.13874	1.14711	1.15411	1.16004	1.16524	1.17003	1.17473	1.17968	1.18519	1.1916	1.19919	1.20738	1.21583	1.22457	1.23363	1.24304	1.25283	1.26303	1.27366	1.28477	1.29637	1.30882	1.32289	1.33805	1.35392	1.37163	1.39065	1.41007	1.42899	1.44649	1.46167
34	Anonymous participant OD 34			0.139986	0.127659	0.115522	0.112001	0.11378	0.115568	0.115145	0.113248	0.111136	0.110035	0.118221	0.137164	0.154235	0.165334	0.189824	0.207831	0.222755	0.234272	0.241808	0.247492	0.257081	0.274527	0.293643	0.307044	0.312941	0.316145	0.317397	0.318672	0.321503	0.326444	0.331441	0.337565	0.347317	0.360554	0.386732	0.410576	0.431579	0.446076	0.449832	0.451246	0.45238	0.4544	0.459878	0.466486	0.469675	0.469609
35	Anonymous participant OD 35			1.82204	1.82792	1.83352	1.8388	1.84371	1.8482	1.85223	1.85575	1.85871	1.86106	1.86276	1.86376	1.86335	1.8378	1.79221	1.74984	1.72354	1.71016	1.70676	1.70426	1.70102	1.69537	1.68511	1.66927	1.64399	1.61253	1.57502	1.52993	1.47844	1.42173	1.36097	1.29736	1.23206	1.16626	1.10113	1.03786	0.977639	0.921653	0.871082	0.827107	0.790905	0.763656	0.746538	0.740731	0.744178	0.745141
36	Anonymous participant OD 36			1.82204	1.82792	1.83352	1.8388	1.84371	1.8482	1.85223	1.85575	1.85871	1.86106	1.86276	1.86376	1.86335	1.8378	1.79221	1.74984	1.72354	1.71016	1.70676	1.70426	1.70102	1.69537	1.68511	1.66927	1.64399	1.61253	1.57502	1.52993	1.47844	1.42173	1.36097	1.29736	1.23206	1.16626	1.10113	1.03786	0.977639	0.921653	0.871082	0.827107	0.790905	0.763656	0.746538	0.740731	0.744178	0.745141
37	Anonymous participant OD 37			1.36446	1.37444	1.38161	1.38544	1.3818	1.35686	1.3256	1.30715	1.30558	1.30456	1.30379	1.30328	1.303	1.30385	1.31854	1.3446	1.37337	1.3962	1.40489	1.4066	1.40758	1.40879	1.41162	1.4266	1.45139	1.47714	1.49548	1.50878	1.51536	1.51852	1.52206	1.53035	1.54493	1.56078	1.57273	1.57957	1.58664	1.59455	1.60284	1.61158	1.62108	1.62962	1.636	1.64411	1.65317	1.662
38	Anonymous participant OD 38			0.922301	0.91663	0.910723	0.904828	0.899034	0.896527	0.896598	0.896699	0.89688	0.89719	0.897589	0.900613	0.907216	0.914976	0.921475	0.924295	0.924386	0.90041	0.863447	0.857937	0.862307	0.865886	0.865753	0.864541	0.862518	0.859813	0.856554	0.852868	0.848883	0.844727	0.838225	0.830944	0.826086	0.823483	0.822968	0.825587	0.846516	0.878368	0.903868	0.909057	0.909287	0.909461	0.909583	0.909655	0.90968	0.902235
39	Anonymous participant OD 39			1.39933	1.40336	1.4074	1.4115	1.41575	1.4202	1.42493	1.43001	1.43549	1.44217	1.45148	1.45825	1.45778	1.45206	1.44292	1.43194	1.4207	1.41077	1.40373	1.40116	1.41436	1.44241	1.47078	1.4921	1.51394	1.52973	1.53321	1.53316	1.53306	1.53293	1.53277	1.53259	1.53241	1.53224	1.53209	1.53198	1.5319	1.53234	1.54458	1.55868	1.56796	1.5761	1.58558	1.59606	1.60619	1.61459
40	Anonymous participant OD 40			0.715935	0.715053	0.713322	0.709163	0.703367	0.69701	0.691168	0.686917	0.685336	0.690038	0.699933	0.709685	0.71815	0.726793	0.736021	0.746239	0.759205	0.77734	0.797058	0.814426	0.825508	0.827133	0.823307	0.815603	0.804348	0.789866	0.772482	0.752521	0.730309	0.70617	0.68043	0.653413	0.625444	0.596849	0.567953	0.539081	0.507046	0.46106	0.406024	0.348388	0.294603	0.251119	0.224388	0.219867	0.230198	0.250963
41	Anonymous participant OD 41			1.84955	1.86236	1.87266	1.87998	1.88386	1.88394	1.87829	1.86647	1.85139	1.83595	1.82304	1.81069	1.79784	1.78702	1.78034	1.77628	1.7727	1.76969	1.76737	1.76581	1.76512	1.76852	1.77096	1.77081	1.76756	1.76364	1.76049	1.75612	1.75111	1.74593	1.73825	1.728	1.71636	1.70452	1.69366	1.68497	1.67963	1.67867	1.68062	1.68406	1.68803	1.689	1.68499	1.67762	1.66961	1.66362
42	Anonymous participant OD 42			0.798187	0.797246	0.794421	0.789708	0.7831	0.778041	0.778231	0.778229	0.777234	0.777329	0.778777	0.780554	0.780549	0.778699	0.779946	0.7793	0.777974	0.777654	0.779541	0.779644	0.778643	0.778891	0.778875	0.778646	0.778498	0.781544	0.783926	0.784349	0.782929	0.779562	0.778991	0.780341	0.780006	0.777149	0.777669	0.777327	0.777872	0.778196	0.779073	0.780138	0.778798	0.777956	0.777483	0.782001	0.78523	0.786598
43	Anonymous participant OD 43			1.49386	1.49711	1.49971	1.50175	1.50332	1.50452	1.50543	1.50615	1.50677	1.50738	1.50807	1.50894	1.51007	1.51156	1.5135	1.51597	1.51939	1.52694	1.53699	1.54957	1.56316	1.56826	1.57174	1.57455	1.57664	1.57798	1.57854	1.57795	1.57683	1.57979	1.58953	1.60076	1.61143	1.61304	1.61237	1.61157	1.6112	1.61191	1.61358	1.61555	1.6172	1.61789	1.61464	1.61202	1.61505	1.61627
44	Anonymous participant OD 44			1.13279	1.13919	1.1463	1.15405	1.16234	1.17111	1.18026	1.18971	1.19939	1.20919	1.21905	1.22888	1.2386	1.24811	1.2577	1.2681	1.27904	1.29022	1.30131	1.312	1.32198	1.33094	1.33856	1.34459	1.34936	1.35333	1.35696	1.36068	1.36496	1.37023	1.37725	1.38673	1.39782	1.40962	1.4212	1.43185	1.44242	1.4527	1.46214	1.47103	1.47957	1.48769	1.4953	1.50233	1.50943	1.517
45	Anonymous participant OD 45			1.13279	1.13919	1.1463	1.15405	1.16234	1.17111	1.18026	1.18971	1.19939	1.20919	1.21905	1.22888	1.2386	1.24811	1.2577	1.2681	1.27904	1.29022	1.30131	1.312	1.32198	1.33094	1.33856	1.34459	1.34936	1.35333	1.35696	1.36068	1.36496	1.37023	1.37725	1.38673	1.39782	1.40962	1.4212	1.43185	1.44242	1.4527	1.46214	1.47103	1.47957	1.48769	1.4953	1.50233	1.50943	1.517
46	Anonymous participant OD 46			1.21861	1.21922	1.21983	1.22059	1.22168	1.22326	1.2272	1.23416	1.24279	1.25172	1.25978	1.26756	1.27559	1.28415	1.29354	1.30536	1.32107	1.33501	1.34136	1.34318	1.34425	1.34551	1.34817	1.35567	1.36201	1.36503	1.36853	1.37556	1.38328	1.38745	1.39018	1.39168	1.39078	1.3875	1.38486	1.38431	1.39524	1.41482	1.43246	1.4403	1.44556	1.44983	1.45325	1.45595	1.45796	1.45956
47	Anonymous participant OD 47			0.577075	0.576164	0.573352	0.568627	0.561989	0.558841	0.562054	0.56958	0.580812	0.592619	0.6014	0.611041	0.62212	0.627498	0.62613	0.622767	0.618637	0.614967	0.612983	0.614953	0.622242	0.631751	0.640233	0.645348	0.64912	0.652205	0.65758	0.6666	0.67718	0.687236	0.694683	0.702046	0.712538	0.723895	0.735342	0.745572	0.752109	0.756936	0.757884	0.755908	0.758382	0.76286	0.767382	0.772875	0.779551	0.786763
48	Anonymous participant OD 48			0.893184	0.897988	0.904798	0.912619	0.923281	0.934509	0.943798	0.952972	0.965722	0.982159	0.996528	1.00824	1.01897	1.03004	1.04278	1.06004	1.08579	1.11263	1.1321	1.13752	1.13877	1.13952	1.14038	1.14199	1.14929	1.16342	1.18174	1.20159	1.22034	1.23531	1.24388	1.24425	1.24069	1.23701	1.24341	1.25619	1.26393	1.26984	1.27464	1.27905	1.28378	1.28955	1.29696	1.30557	1.31504	1.32513
49	Anonymous participant OD 49			0.93397	0.938503	0.943429	0.948676	0.954173	0.959846	0.965624	0.971434	0.978002	0.987787	0.999488	1.01142	1.02191	1.02927	1.03183	1.03163	1.0311	1.03031	1.0293	1.02593	1.01997	1.01478	1.01399	1.02133	1.02968	1.03404	1.03552	1.03582	1.03495	1.03872	1.0458	1.05116	1.05594	1.05867	1.05856	1.05685	1.05443	1.0515	1.04648	1.04037	1.03463	1.0307	1.03031	1.03558	1.03977	1.04113
50	Anonymous participant OD 50			0.698725	0.699104	0.702523	0.706318	0.707742	0.70774	0.707737	0.707731	0.707721	0.707709	0.70656	0.701477	0.697381	0.701548	0.705925	0.704675	0.705195	0.711139	0.729624	0.742983	0.747479	0.752912	0.760952	0.769718	0.777501	0.782818	0.780971	0.777317	0.771728	0.761593	0.755623	0.759957	0.768156	0.780505	0.792047	0.797772	0.801023	0.803941	0.808362	0.82083	0.823684	0.825379	0.830278	0.836128	0.839691	0.837972
51	Anonymous participant OD 51			0.730394	0.729452	0.726627	0.721914	0.715306	0.710232	0.710354	0.710685	0.712193	0.713831	0.715732	0.719861	0.725314	0.727784	0.74546	0.747769	0.743104	0.738526	0.737288	0.737709	0.737536	0.737183	0.736901	0.736899	0.738002	0.739848	0.743679	0.749441	0.75151	0.747892	0.74225	0.742362	0.741892	0.739601	0.736239	0.736193	0.740631	0.744723	0.74967	0.756581	0.773645	0.797621	0.815248	0.820888	0.824301	0.823798
52	Anonymous participant OD 52			0.715935	0.715053	0.713322	0.709163	0.703367	0.69701	0.691168	0.686917	0.685336	0.690038	0.699933	0.709685	0.71815	0.726793	0.736021	0.746239	0.759205	0.77734	0.797058	0.814426	0.825508	0.827133	0.823307	0.815603	0.804348	0.789866	0.772482	0.752521	0.730309	0.70617	0.68043	0.653413	0.625444	0.596849	0.567953	0.539081	0.507046	0.46106	0.406024	0.348388	0.294603	0.251119	0.224388	0.219867	0.230198	0.250963
53	Anonymous participant OD 53			1.4573	1.45833	1.45586	1.45272	1.44897	1.44461	1.43966	1.43412	1.428	1.42015	1.40992	1.3978	1.38428	1.36987	1.35505	1.34033	1.3262	1.31316	1.30152	1.28959	1.27783	1.2674	1.25949	1.25455	1.2508	1.24788	1.24558	1.2437	1.24202	1.24034	1.23845	1.23614	1.23321	1.22944	1.22464	1.21557	1.19733	1.18915	1.18698	1.18574	1.18477	1.18343	1.18102	1.17705	1.17171	1.1653
54	Anonymous participant OD 54			1.55573	1.56212	1.56808	1.57362	1.57873	1.58342	1.58769	1.59156	1.59503	1.5981	1.60077	1.60306	1.60496	1.60649	1.60764	1.60843	1.60886	1.60845	1.60145	1.59056	1.58148	1.5827	1.5839	1.58203	1.57895	1.57485	1.56991	1.56433	NaN	NaN	NaN	NaN	NaN	NaN	NaN	NaN	NaN	NaN	NaN	NaN	NaN	NaN	NaN	NaN	NaN	NaN
55	Anonymous participant OD 55			1.57235	1.57208	1.57189	1.57179	1.5719	1.57834	1.58988	1.60019	1.60303	1.59802	1.59447	1.59707	1.60006	1.59686	1.58809	1.57242	1.56848	1.5696	1.5713	1.5729	1.57372	1.57187	1.56703	1.56245	1.56117	1.5612	1.56125	1.56135	1.56151	1.56174	1.56442	1.57735	1.58722	1.59462	1.59832	1.6005	1.5986	1.59622	1.59389	1.58701	1.58038	1.57399	1.56877	1.5658	1.56599	1.56775
56	Anonymous participant OD 56			0.99184	0.983843	0.975354	0.966427	0.957116	0.940636	0.917845	0.907049	0.90941	0.91525	0.923361	0.932538	0.941574	0.949308	0.957914	0.966034	0.969269	0.965578	0.966714	0.973558	0.987491	0.987014	0.986223	0.987291	0.990651	0.995087	0.999363	1.00225	0.998441	0.97871	0.979033	0.981259	0.984816	0.989474	1.00376	1.03285	1.05927	1.06639	1.06238	1.05439	1.04373	1.03174	1.01972	1.00201	0.994325	1.00141
57	Anonymous participant OD 57			1.71468	1.7137	1.71246	1.71101	1.70938	1.70761	1.70574	1.70381	1.70186	1.69992	1.69805	1.69626	1.69461	1.69313	1.69187	1.69078	1.68963	1.68848	1.68741	1.68652	1.6859	1.68564	1.68706	1.6916	1.69859	1.70738	1.71727	1.72759	1.73766	1.7468	1.75434	1.75964	1.76393	1.76503	1.76376	1.76125	1.75781	1.75376	1.74939	1.74503	1.74098	1.73755	1.73505	1.73322	1.73178	1.73061
58	Anonymous participant OD 58			0.646638	0.643097	0.634073	0.62196	0.609149	0.601233	0.600795	0.600567	0.600486	0.604481	0.615883	0.616628	0.61685	0.618914	0.623758	0.625194	0.621919	0.616689	0.612043	0.611191	0.626663	0.637417	0.643741	0.648322	0.652221	0.656499	0.662218	0.67061	0.690796	0.714739	0.727118	0.732738	0.733024	0.729639	0.724248	0.720175	0.723645	0.736	0.747924	0.753462	0.757273	0.762334	0.773999	0.794267	0.818717	0.84289
59	Anonymous participant OD 59			0.99184	0.983843	0.975354	0.966427	0.957116	0.940636	0.917845	0.907049	0.90941	0.91525	0.923361	0.932538	0.941574	0.949308	0.957914	0.966034	0.969269	0.965578	0.966714	0.973558	0.987491	0.987014	0.986223	0.987291	0.990651	0.995087	0.999363	1.00225	0.998441	0.97871	0.979033	0.981259	0.984816	0.989474	1.00376	1.03285	1.05927	1.06639	1.06238	1.05439	1.04373	1.03174	1.01972	1.00201	0.994325	1.00141
60	Anonymous participant OD 60			0.808135	0.807235	0.804409	0.799676	0.792195	0.789899	0.790477	0.792317	0.800309	0.812523	0.825753	0.83683	0.845711	0.854249	0.86352	0.874725	0.888102	0.901693	0.914084	0.925719	0.936856	0.947744	0.958628	0.969756	0.981374	0.993729	1.00707	1.02163	1.03826	1.05909	1.08201	1.10432	1.12335	1.1389	1.15402	1.17196	1.18897	1.20481	1.21854	1.22947	1.23858	1.24751	1.25807	1.2712	1.28547	1.29932
61	Anonymous participant OD 61			1.45756	1.46314	1.47107	1.48073	1.4915	1.50276	1.51389	1.52428	1.53403	1.54309	1.54962	1.55421	1.5579	1.56147	1.56571	1.5714	1.58062	1.59661	1.61768	1.64186	1.66715	1.69158	1.71317	1.7306	1.74648	1.76142	1.7755	1.78881	1.80128	1.81181	1.82111	1.8303	1.84051	1.85284	1.86896	1.89624	1.92906	1.95743	NaN	NaN	NaN	NaN	NaN	NaN	NaN	NaN
62	Anonymous participant OD 62			1.75064	1.74689	1.74261	1.73774	1.73225	1.72608	1.7192	1.71156	1.70311	1.6695	1.63937	1.6522	1.65772	1.6624	1.66631	1.6695	1.67203	1.67397	1.67537	1.6763	1.67681	1.67698	1.67544	1.67129	1.66535	1.65846	1.65147	1.6452	1.64046	1.63695	1.63397	1.63118	1.62819	1.62465	1.62017	1.61252	1.60148	1.58865	1.5756	1.56393	1.55521	1.55103	1.55152	1.55398	1.55784	1.5626
63	Anonymous participant OD 63			1.14795	1.15964	1.16775	1.17425	1.18109	1.19024	1.20027	1.20814	1.2134	1.21563	1.21001	1.19186	1.16713	1.1413	1.10166	1.06085	1.04543	1.04595	1.0473	1.04949	1.05254	1.05865	1.06199	1.06312	1.06378	1.06464	1.06374	1.06043	1.05717	1.05641	1.06321	1.0806	1.09509	1.09961	1.10189	1.10368	1.10622	1.11201	1.1205	1.12397	1.12445	1.12847	1.13505	1.13971	1.1426	1.14383
64	Anonymous participant OD 64			0.79651	0.795564	0.79274	0.788013	0.781405	0.776389	0.777014	0.778343	0.780365	0.783069	0.790035	0.795875	0.800538	0.804521	0.808101	0.811558	0.815152	0.81838	0.821251	0.824241	0.827831	0.832606	0.841461	0.853611	0.866496	0.877554	0.884224	0.887008	0.889333	0.891062	0.892018	0.891875	0.890342	0.889319	0.894534	0.901012	0.899698	0.896332	0.895293	0.900806	0.905476	0.903457	0.898914	0.895257	0.895597	0.899065
65	Anonymous participant OD 65			1.30419	1.30495	1.32149	1.35067	1.38302	1.4091	1.42171	1.42907	1.43642	1.44528	1.45384	1.46144	1.46864	1.47584	1.48362	1.49215	1.50014	1.50621	1.51009	1.51292	1.51564	1.5192	1.5253	1.53972	1.55846	1.57532	1.58406	1.58432	1.5829	1.57767	1.57116	1.56621	1.56583	1.57299	1.5846	1.59639	1.60411	1.60317	1.59604	1.58394	1.56819	1.55033	1.52583	1.52855	1.54476	1.56438
66	Anonymous participant OD 66			1.51664	1.51909	1.52065	1.52125	1.51773	1.50733	1.49309	1.47811	1.46547	1.45827	1.45692	1.45639	1.45589	1.45484	1.44652	1.43001	1.41325	1.39366	1.37181	1.34786	1.32081	1.28875	1.25835	1.23783	1.23658	1.25664	1.29076	1.33138	1.37094	1.40188	1.41665	1.41322	1.39968	1.3781	1.35037	1.31839	1.28405	1.24924	1.21586	1.18581	1.16097	1.14324	1.13333	1.12512	1.10863	1.07611
67	Anonymous participant OD 67			1.16647	1.15215	1.13645	1.11972	1.10232	1.07664	1.05643	1.04721	1.06238	1.09648	1.13043	1.14514	1.14461	1.14364	1.14302	1.15458	1.18142	1.19789	1.20895	1.21618	1.21757	1.2178	1.21792	1.21789	1.21751	1.21808	1.22088	1.22588	1.23681	1.25107	1.26536	1.27641	1.28095	1.28156	1.28189	1.28255	1.29173	1.31134	1.32356	1.32925	1.33203	1.3265	1.32542	1.32865	1.33368	1.34053
68	Anonymous participant OD 68			2.28661	2.29673	2.3061	2.31473	2.32262	2.32977	2.3362	2.34189	2.34686	2.35111	2.35464	2.35745	2.35956	2.36095	2.36164	2.3594	2.34535	2.32616	2.30662	2.28266	2.25708	2.23305	2.21205	2.19013	2.17705	2.17662	2.17696	2.17753	2.17829	2.1792	2.18023	2.18134	2.1825	2.18366	2.18481	2.18589	2.18687	2.18772	2.1884	2.18887	2.18911	2.17566	2.16563	2.1707	2.17031	2.169
69	Anonymous participant OD 69			0.463684	0.477675	0.491574	0.505285	0.518307	0.530141	0.543113	0.558229	0.574562	0.589332	0.599446	0.60551	0.609872	0.612051	0.610474	0.603933	0.597748	0.597512	0.604695	0.615923	0.629689	0.651373	0.675649	0.695746	0.708768	0.719096	0.728321	0.737965	0.749554	0.764468	0.785358	0.806594	0.815559	0.820355	0.823752	0.826334	0.828688	0.831397	0.835049	0.840809	0.850737	0.861345	0.868438	0.869344	0.86919	0.868899
70	Anonymous participant OD 70			0.839361	0.84407	0.848145	0.85137	0.853525	0.854392	0.843511	0.841065	0.842413	0.844518	0.846963	0.84933	0.851204	0.852166	0.852031	0.851232	0.849829	0.844975	0.842245	0.849756	0.858734	0.862787	0.86494	0.867061	0.870848	0.879273	0.889296	0.896577	0.897054	0.891612	0.885121	0.882611	0.894016	0.917004	0.942229	0.960368	0.970237	0.979407	0.992811	1.00471	1.01512	1.02402	1.0309	1.03594	1.03772	1.03807
71	Anonymous participant OD 71			1.41278	1.42219	1.42871	1.43177	1.42708	1.42249	1.42289	1.42376	1.42505	1.42674	1.42878	1.43113	1.43376	1.43664	1.43971	1.4431	1.44917	1.45708	1.46467	1.46986	1.47291	1.47592	1.48055	1.48681	1.49401	1.5015	1.50954	1.51927	1.53354	1.55393	1.57479	1.59024	1.60106	1.61079	1.6194	1.62683	1.63306	1.63805	1.64167	1.64414	1.64607	1.64813	1.65096	1.6552	1.66695	1.68466
72	Anonymous participant OD 72			2.18349	2.1828	2.17815	2.16996	2.15865	2.14465	2.1284	2.11032	2.09084	2.07039	2.04939	2.0257	1.99874	1.97133	1.94474	1.91926	1.89385	1.85917	1.83691	1.84667	1.85842	1.8665	1.87339	1.87981	1.88651	1.89385	1.90113	1.90949	1.92173	1.93416	1.94173	1.94416	1.94488	1.94515	1.94507	1.94481	1.94057	1.93287	1.92518	1.91525	1.9047	1.89572	1.89051	1.8909	1.89578	1.90284
73	Anonymous participant OD 73			0.808135	0.807235	0.804409	0.799676	0.792195	0.789899	0.790477	0.792317	0.800309	0.812523	0.825753	0.83683	0.845711	0.854249	0.86352	0.874725	0.888102	0.901693	0.914084	0.925719	0.936856	0.947744	0.958628	0.969756	0.981374	0.993729	1.00707	1.02163	1.03826	1.05909	1.08201	1.10432	1.12335	1.1389	1.15402	1.17196	1.18897	1.20481	1.21854	1.22947	1.23858	1.24751	1.25807	1.2712	1.28547	1.29932
74	Anonymous participant OD 74			1.41238	1.38289	1.3413	1.32862	1.33239	1.33902	1.3474	1.35643	1.36791	1.38546	1.40636	1.42774	1.44673	1.46045	1.46603	1.46134	1.45187	1.43702	1.41991	1.40396	1.3923	1.38197	1.3717	1.36187	1.35291	1.3452	1.33916	1.33519	1.3337	1.34712	1.36672	1.39205	1.41859	1.44139	1.45549	1.45667	1.44907	1.43864	1.43079	1.42734	1.44881	1.46028	1.46913	1.47619	1.48149	1.48507
75	Anonymous participant OD 75			1.67536	1.65535	1.63505	1.6149	1.59534	1.5768	1.55797	1.5369	1.51873	1.50554	1.49428	1.48447	1.47565	1.46751	1.46001	1.4531	1.44674	1.44088	1.436	1.43227	1.42864	1.42407	1.41749	1.40314	1.38484	1.37055	1.36247	1.35633	1.35088	1.34613	1.34182	1.33762	1.33347	1.3294	1.32321	1.31525	1.30807	1.30114	1.29445	1.28792	1.28151	1.2752	1.26894	1.2627	1.25645	1.25074
76	Anonymous participant OD 76			0.795112	0.794166	0.791353	0.786632	0.780053	0.778737	0.777885	0.777416	0.777248	0.777284	0.77741	0.777539	0.777473	0.775624	0.776871	0.776164	0.775257	0.775621	0.776577	0.781774	0.789599	0.801154	0.810947	0.825114	0.843687	0.853055	0.858968	0.863925	0.869802	0.877731	0.886906	0.897128	0.908229	0.920054	0.935888	0.952626	0.961885	0.964865	0.96714	0.972594	0.98956	1.01187	1.03016	1.03658	1.03924	1.04088
77	Anonymous participant OD 77			1.45756	1.46314	1.47107	1.48073	1.4915	1.50276	1.51389	1.52428	1.53403	1.54309	1.54962	1.55421	1.5579	1.56147	1.56571	1.5714	1.58062	1.59661	1.61768	1.64186	1.66715	1.69158	1.71317	1.7306	1.74648	1.76142	1.7755	1.78881	1.80128	1.81181	1.82111	1.8303	1.84051	1.85284	1.86896	1.89624	1.92906	1.95743	NaN	NaN	NaN	NaN	NaN	NaN	NaN	NaN
78	Anonymous participant OD 78			1.07985	1.06995	1.0599	1.04992	1.04023	1.03105	1.0226	1.01511	1.00879	1.00387	1.00056	1.0018	1.01636	1.03609	1.05148	1.06232	1.06868	1.07226	1.07124	1.06218	1.04853	1.03459	1.02465	1.02361	1.03825	1.05778	1.06753	1.06658	1.06425	1.06128	1.05841	1.0564	1.05637	1.06438	1.07867	1.09446	1.11113	1.12786	1.13919	1.14661	1.15147	1.15261	1.15271	1.15276	1.15212	1.14393
79	Anonymous participant OD 79			1.41278	1.42219	1.42871	1.43177	1.42708	1.42249	1.42289	1.42376	1.42505	1.42674	1.42878	1.43113	1.43376	1.43664	1.43971	1.4431	1.44917	1.45708	1.46467	1.46986	1.47291	1.47592	1.48055	1.48681	1.49401	1.5015	1.50954	1.51927	1.53354	1.55393	1.57479	1.59024	1.60106	1.61079	1.6194	1.62683	1.63306	1.63805	1.64167	1.64414	1.64607	1.64813	1.65096	1.6552	1.66695	1.68466
80	Anonymous participant OD 80			1.40447	1.39403	1.38289	1.37145	1.36009	1.34919	1.33914	1.33033	1.32314	1.31795	1.31516	1.31457	1.31428	1.31443	1.31671	1.32077	1.32384	1.32481	1.32557	1.3261	1.32637	1.32583	1.32268	1.31761	1.31137	1.30022	1.29141	1.28313	1.27718	1.27576	1.27794	1.28034	1.27731	1.26289	1.24962	1.24779	1.24781	1.24785	1.24791	1.24801	1.24813	1.24829	1.24849	1.24873	1.25243	1.26161
81	Anonymous participant OD 81			0.359814	0.376263	0.41423	0.46043	0.501576	0.524349	0.498674	0.445105	0.419379	0.427702	0.439706	0.452488	0.463386	0.468422	0.468929	0.468981	0.463329	0.453403	0.445086	0.439449	0.435502	0.435353	0.43617	0.437372	0.440232	0.444671	0.452711	0.464656	0.477153	0.486849	0.490087	0.481618	0.470212	0.467159	0.47996	0.491299	0.500551	0.509207	0.517406	0.52529	0.532997	0.541421	0.545906	0.54533	0.544019	0.542022
82	Anonymous participant OD 82			0.359814	0.376263	0.41423	0.46043	0.501576	0.524349	0.498674	0.445105	0.419379	0.427702	0.439706	0.452488	0.463386	0.468422	0.468929	0.468981	0.463329	0.453403	0.445086	0.439449	0.435502	0.435353	0.43617	0.437372	0.440232	0.444671	0.452711	0.464656	0.477153	0.486849	0.490087	0.481618	0.470212	0.467159	0.47996	0.491299	0.500551	0.509207	0.517406	0.52529	0.532997	0.541421	0.545906	0.54533	0.544019	0.542022
83	Anonymous participant OD 83			0.922301	0.91663	0.910723	0.904828	0.899034	0.896527	0.896598	0.896699	0.89688	0.89719	0.897589	0.900613	0.907216	0.914976	0.921475	0.924295	0.924386	0.90041	0.863447	0.857937	0.862307	0.865886	0.865753	0.864541	0.862518	0.859813	0.856554	0.852868	0.848883	0.844727	0.838225	0.830944	0.826086	0.823483	0.822968	0.825587	0.846516	0.878368	0.903868	0.909057	0.909287	0.909461	0.909583	0.909655	0.90968	0.902235
84	Anonymous participant OD 84			1.20768	1.20589	1.20451	1.2036	1.20319	1.2079	1.21641	1.22135	1.22592	1.23222	1.24539	1.26861	1.28808	1.30325	1.31352	1.32188	1.32925	1.3349	1.33812	1.33794	1.33337	1.32664	1.32045	1.31643	1.31295	1.31179	1.31689	1.32783	1.34192	1.35646	1.36879	1.3762	1.3765	1.37264	1.36951	1.37671	1.39744	1.41576	1.42896	1.43977	1.44944	1.45774	1.46415	1.47027	1.47714	1.48449
85	Anonymous participant OD 85			1.4028	1.38745	1.37273	1.359	1.34664	1.33551	1.32434	1.31417	1.3062	1.30023	1.29413	1.28449	1.27657	1.27843	1.28296	1.28956	1.29727	1.30507	1.31196	1.31902	1.32562	1.3289	1.32983	1.33044	1.33063	1.33061	1.33058	1.33054	1.3305	1.33048	1.34831	1.3888	1.41998	1.44892	1.47484	1.49692	1.51437	1.5264	1.5322	1.53251	1.53212	1.53167	1.53144	1.53242	1.53488	1.53749
86	Anonymous participant OD 86			1.2285	1.22822	1.22791	1.22756	1.22717	1.22673	1.21859	1.20703	1.19383	1.17447	1.16045	1.15795	1.15596	1.15435	1.15309	1.15217	1.15154	1.1512	1.15163	1.16643	1.17014	1.17313	1.17544	1.17712	1.17822	1.17879	1.17797	1.16541	1.14707	1.13439	1.12823	1.12263	1.11775	1.11378	1.11089	1.10924	1.10902	1.10979	1.11014	1.10528	1.09606	1.0868	1.08142	1.07816	1.0757	1.07379
87	Anonymous participant OD 87			0.919425	0.917826	0.917912	0.918209	0.91867	0.919262	0.921372	0.925049	0.928756	0.930957	0.931044	0.930855	0.930618	0.930433	0.930714	0.935282	0.943887	0.954793	0.966267	0.982647	0.989972	0.992858	0.994758	0.996358	0.998347	1.00131	1.00418	1.00498	0.989455	0.981558	0.987113	0.997456	1.00975	1.02114	1.0288	1.03012	1.02694	1.01917	1.00845	1.00575	1.0048	1.00318	0.99523	0.989137	0.983886	0.978031
88	Anonymous participant OD 88			1.53745	1.53474	1.53185	1.52881	1.52559	1.52221	1.51867	1.51496	1.51109	1.50706	1.50287	1.49674	1.48628	1.47416	1.45799	1.44709	1.44387	1.44105	1.43714	1.43273	1.42792	1.42281	1.41748	1.41203	1.40523	1.39894	1.39947	1.40045	1.39997	1.39886	1.39723	NaN	NaN	NaN	NaN	NaN	NaN	NaN	NaN	NaN	NaN	NaN	NaN	NaN	NaN	NaN
	mean			1.19441	1.19484	1.19559	1.1967	1.19721	1.19674	1.19472	1.19234	1.1911	1.19052	1.19056	1.19076	1.19108	1.19194	1.1928	1.19363	1.19493	1.19631	1.19775	1.20066	1.2043	1.2078	1.21099	1.21374	1.21671	1.21999	1.22323	1.22205	1.21987	1.22159	1.2241	1.22455	1.22654	1.22809	1.22782	1.23005	1.22662	1.2276	1.20864	1.2068	1.20497	1.2037	1.20331	1.2047	1.20758	1.21095
	std			0.430998	0.430665	0.429268	0.427406	0.425638	0.424458	0.424901	0.426026	0.425451	0.421969	0.418145	0.414889	0.411598	0.407597	0.402848	0.399614	0.398101	0.396977	0.396087	0.395102	0.393639	0.392068	0.390474	0.388817	0.387647	0.387061	0.386202	0.388574	0.388727	0.389576	0.390815	0.394325	0.395542	0.397012	0.399628	0.400786	0.40145	0.403668	0.39349	0.395771	0.398251	0.399594	0.400146	0.400967	0.40145	0.402003
	min			-0.136115	-0.136552	-0.133378	-0.129298	-0.127013	-0.129227	-0.135157	-0.142623	-0.158684	-0.150744	-0.136322	-0.12123	-0.112673	-0.104181	-0.0973203	-0.0943109	-0.0938887	-0.093149	-0.0918455	-0.0845756	-0.0700894	-0.0513699	-0.0297587	-0.00440687	0.0190839	0.0415652	0.0619028	0.0784394	0.0913297	0.102077	0.109298	0.113862	0.11746	0.119938	0.121142	0.119977	0.115055	0.110343	0.115639	0.123063	0.12784	0.134017	0.143293	0.15388	0.163991	0.17184
	max			2.28661	2.29673	2.3061	2.31473	2.32262	2.32977	2.3362	2.34189	2.34686	2.35111	2.35464	2.35745	2.35956	2.36095	2.36164	2.3594	2.34535	2.32616	2.30662	2.28266	2.25708	2.23305	2.21205	2.19013	2.17705	2.17662	2.17696	2.17753	2.17829	2.1792	2.18023	2.18134	2.1825	2.18366	2.18481	2.18589	2.18687	2.18772	2.1884	2.18887	2.18911	2.17566	2.16563	2.1707	2.17031	2.169
[truncated: 315 more columns]

## Sheet: OD
Geometrical characteristics of right eyes as measured by the ESP system
count	Name		HVID mm	Astigmatism D	Axis rad	Sphere D	SimK_Astigmatism D	SimK_Angle rad	SimK_Flat_Radius mm	SimK_Steep_Radius mm
1	Anonymous participant OD 1		12.449	-0.823715	1.75264	41.73	-0.420164	1.71364	8.29218	8.20745
2	Anonymous participant OD 2		11.5336	-2.92065	1.76987	44.8367	-2.43885	1.67424	8.15228	7.69874
3	Anonymous participant OD 3		12.2659	-0.873868	1.41413	39.7467	-2.30696	1.51247	9.60235	9.01091
4	Anonymous participant OD 4		12.0828	-1.7037	1.61175	42.9575	-3.23557	1.58761	8.50163	7.86093
5	Anonymous participant OD 5		11.7167	-1.46321	1.72762	44.3853	-2.95311	1.60995	8.11904	7.58051
6	Anonymous participant OD 6		12.0828	-2.56846	1.69873	43.3836	-2.73885	1.68894	8.49221	7.9447
7	Anonymous participant OD 7		12.0828	-0.98292	1.7583	42.2652	-1.19777	1.6234	8.19033	7.95898
8	Anonymous participant OD 8		11.7167	-1.30039	1.51297	41.3542	-2.07785	1.44374	8.6237	8.18893
9	Anonymous participant OD 9		12.2659	-0.537361	2.54853	43.9953	-1.31877	2.63663	7.90289	7.66615
10	Anonymous participant OD 10		11.8998	-1.49046	1.65163	43.3964	-2.63546	1.71197	8.34798	7.8371
11	Anonymous participant OD 11		11.3505	-1.40967	1.81129	44.6297	-1.55243	1.69078	7.9208	7.64236
12	Anonymous participant OD 12		12.6321	-0.717544	1.52843	43.9923	-1.90038	1.23357	7.9198	7.5817
13	Anonymous participant OD 13		12.449	-2.15678	1.7137	44.3387	-3.35127	1.68696	8.36356	7.72225
14	Anonymous participant OD 14		11.8998	-1.64727	1.61832	42.0032	-2.8606	1.54552	8.73996	8.13717
15	Anonymous participant OD 15		11.8998	-3.37157	1.48486	43.6299	-6.01746	1.47382	8.77197	7.58559
16	Anonymous participant OD 16		10.9844	-2.52683	1.62215	43.7147	-4.11946	1.66373	8.71978	7.88099
17	Anonymous participant OD 17		12.2659	-2.28714	1.74739	44.7159	-3.79323	1.63267	8.2205	7.52523
18	Anonymous participant OD 18		11.8998	-1.18249	1.70792	43.6159	-2.64923	1.63218	8.11688	7.6307
19	Anonymous participant OD 19		10.8013	-1.53489	1.61956	43.523	-1.14683	1.51942	8.24238	8.01782
20	Anonymous participant OD 20		12.0828	-2.53318	1.59428	43.0707	-2.53173	1.50563	8.47644	7.96968
21	Anonymous participant OD 21		12.0828	-2.27527	1.58357	43.7798	-1.70117	1.52133	7.96486	7.65744
22	Anonymous participant OD 22		11.1675	-1.43793	1.46966	46.4037	-1.80846	1.45081	7.61397	7.31551
23	Anonymous participant OD 23		12.6321	-2.26449	1.68216	42.9162	-3.27125	1.68963	8.53715	7.88472
24	Anonymous participant OD 24		12.449	-1.41349	1.58627	39.8736	-2.642	1.52803	8.87717	8.30036
25	Anonymous participant OD 25		11.5336	-1.6091	1.64389	42.1298	-2.78866	1.62538	8.6674	8.08816
26	Anonymous participant OD 26		11.7167	-1.75761	1.67014	43.9763	-2.44052	1.58067	8.076	7.63039
27	Anonymous participant OD 27		12.2659	-2.02419	1.47301	42.5087	-3.87374	1.46196	8.66159	7.87836
28	Anonymous participant OD 28		11.8998	-1.29943	1.50311	41.5189	-2.33671	1.48836	8.54608	8.06866
29	Anonymous participant OD 29		12.449	-2.62127	1.60025	40.7218	-5.01957	1.60081	9.245	8.12748
30	Anonymous participant OD 30		11.8998	-1.69787	1.63427	43.5534	-2.41311	1.66638	8.35686	7.88568
31	Anonymous participant OD 31		12.0828	-2.24837	1.49686	43.0715	-4.47735	1.45524	8.67932	7.78315
32	Anonymous participant OD 32		11.5336	-1.6091	1.64389	42.1298	-2.78866	1.62538	8.6674	8.08816
33	Anonymous participant OD 33		12.6321	-2.07068	1.6058	39.9161	-2.7657	1.56721	9.13128	8.49557
34	Anonymous participant OD 34		12.449	-1.99505	1.56769	42.1957	-2.41711	1.608	8.42268	7.94351
35	Anonymous participant OD 35		11.8998	-1.70803	1.64658	44.9171	-2.44016	1.60087	7.82606	7.40695
36	Anonymous participant OD 36		11.8998	-1.70803	1.64658	44.9171	-2.44016	1.60087	7.82606	7.40695
37	Anonymous participant OD 37		11.5336	-2.50264	1.56447	44.8641	-3.33463	1.48597	8.29407	7.66586
38	Anonymous participant OD 38		11.7167	-2.49394	1.91141	42.722	-3.44147	1.82868	8.60675	7.91234
39	Anonymous participant OD 39		11.8998	-0.941888	1.78687	42.1989	-1.84701	1.7028	8.49045	8.11345
40	Anonymous participant OD 40		11.8998	-2.8135	1.59834	43.5134	-4.63639	1.5423	8.47023	7.58737
41	Anonymous participant OD 41		11.5336	-1.28435	1.68943	43.698	-2.3184	1.63094	8.06338	7.64019
42	Anonymous participant OD 42		11.5336	-1.77149	1.64754	48.3306	-2.60506	1.65901	7.41065	7.00969
43	Anonymous participant OD 43		12.0828	-2.06032	1.56335	41.7578	-2.30865	1.53581	8.68183	8.19514
44	Anonymous participant OD 44		12.2659	-1.62116	1.66127	43.082	-3.11901	1.65407	8.28027	7.69169
45	Anonymous participant OD 45		12.2659	-1.62116	1.66127	43.082	-3.11901	1.65407	8.28027	7.69169
46	Anonymous participant OD 46		11.8998	-1.33365	1.62719	43.5139	-2.06981	1.55325	8.31445	7.91106
47	Anonymous participant OD 47		11.8998	-1.73545	1.7459	45.6246	-3.25233	1.67976	8.01647	7.4416
48	Anonymous participant OD 48		11.8998	-1.90323	1.67468	43.74	-2.81619	1.63294	8.30267	7.76473
49	Anonymous participant OD 49		12.6321	-0.996039	1.4129	41.5181	-2.274	1.41496	8.6621	8.18443
50	Anonymous participant OD 50		11.8998	-1.21567	1.56508	44.8442	-2.3664	1.54609	8.02058	7.59355
51	Anonymous participant OD 51		12.6321	-2.20466	1.67515	41.9085	-3.28042	1.62765	8.91705	8.20584
52	Anonymous participant OD 52		11.8998	-2.8135	1.59834	43.5134	-4.63639	1.5423	8.47023	7.58737
53	Anonymous participant OD 53		11.5336	-2.37666	1.66916	45.8893	-3.33716	1.75895	7.87401	7.30524
54	Anonymous participant OD 54		12.2659	-1.6746	1.69825	43.5907	-2.47571	1.67216	8.25188	7.78089
55	Anonymous participant OD 55		11.5336	-1.32357	1.64109	44.9182	-2.66197	1.64986	8.01073	7.53467
56	Anonymous participant OD 56		11.8998	-1.97878	1.57823	42.8642	-3.18224	1.6047	8.59479	7.95049
57	Anonymous participant OD 57		11.3505	-0.942307	1.58989	44.0635	-2.03706	1.51742	8.13828	7.75724
58	Anonymous participant OD 58		12.449	-0.897848	1.64077	39.6977	-1.79274	1.44104	9.04315	8.62867
59	Anonymous participant OD 59		11.8998	-1.97878	1.57823	42.8642	-3.18224	1.6047	8.59479	7.95049
60	Anonymous participant OD 60		12.6321	-2.44468	1.53577	43.5498	-4.61345	1.43587	8.46435	7.58656
61	Anonymous participant OD 61		11.5336	-0.188255	2.99038	43.6927	-0.923494	3.10756	8.02079	7.84853
62	Anonymous participant OD 62		11.7167	-1.57689	1.68884	45.2092	-3.08599	1.61541	8.03891	7.48847
63	Anonymous participant OD 63		11.8998	-0.655647	1.83322	43.117	-1.94291	1.49512	8.37604	7.99074
64	Anonymous participant OD 64		12.449	-1.02853	1.68666	42.9746	-1.51032	1.50123	8.0471	7.76739
65	Anonymous participant OD 65		12.0828	-0.98292	1.7583	42.2652	-1.19777	1.6234	8.19033	7.95898
66	Anonymous participant OD 66		12.0828	-1.61184	1.69354	41.6723	-2.89549	1.58163	8.80208	8.18406
67	Anonymous participant OD 67		11.3505	-2.34429	1.56023	44.7527	-3.69325	1.50941	8.32866	7.63299
68	Anonymous participant OD 68		12.0828	-0.781684	1.61498	41.0587	-1.98104	1.50406	8.5478	8.13941
69	Anonymous participant OD 69		12.2659	-1.88925	1.52289	39.8207	-2.8084	1.50854	9.23692	8.57763
70	Anonymous participant OD 70		12.0828	-1.13963	1.63489	41.5179	-1.82511	1.62292	8.62722	8.24266
71	Anonymous participant OD 71		12.2659	-1.54104	1.66603	43.4897	-1.1463	1.47637	8.10527	7.88812
72	Anonymous participant OD 72		11.1675	-1.43793	1.46966	46.4037	-1.80846	1.45081	7.61397	7.31551
73	Anonymous participant OD 73		12.6321	-2.44468	1.53577	43.5498	-4.61345	1.43587	8.46435	7.58656
74	Anonymous participant OD 74		12.0828	-0.129448	1.7205	43.527	-0.678536	1.7438	7.90611	7.78241
75	Anonymous participant OD 75		11.8998	-1.21947	1.51266	41.7911	-2.81431	1.53732	8.61633	8.03875
76	Anonymous participant OD 76		12.0828	-1.55159	1.92463	42.1706	-2.87671	1.82273	8.69767	8.09737
77	Anonymous participant OD 77		11.5336	-0.188255	2.99038	43.6927	-0.923494	3.10756	8.02079	7.84853
78	Anonymous participant OD 78		12.0828	-3.45302	1.68522	43.336	-4.16558	1.64307	8.5083	7.69973
79	Anonymous participant OD 79		12.2659	-1.54104	1.66603	43.4897	-1.1463	1.47637	8.10527	7.88812
80	Anonymous participant OD 80		12.6321	-3.97066	1.70072	42.9025	-5.7136	1.67311	8.90981	7.74203
81	Anonymous participant OD 81		11.8998	-2.10298	1.72306	44.0424	-3.24949	1.64557	8.35261	7.73089
82	Anonymous participant OD 82		11.8998	-2.10298	1.72306	44.0424	-3.24949	1.64557	8.35261	7.73089
83	Anonymous participant OD 83		11.7167	-2.49394	1.91141	42.722	-3.44147	1.82868	8.60675	7.91234
84	Anonymous participant OD 84		12.0828	-1.28613	1.56186	41.6175	-2.05777	1.47131	8.75499	8.31133
85	Anonymous participant OD 85		11.7167	-1.75761	1.67014	43.9763	-2.44052	1.58067	8.076	7.63039
86	Anonymous participant OD 86		12.6321	-1.39228	1.59842	39.0138	-2.16203	1.63675	9.33984	8.81257
87	Anonymous participant OD 87		12.2659	-2.29164	1.72122	41.771	-2.95729	1.60005	8.76557	8.14033
88	Anonymous participant OD 88		12.6321	-1.12123	1.51418	38.4799	-1.09971	1.38536	9.23502	8.96524
	mean		11.9892	-1.71508	1.68115	43.0825	-2.68166	1.63027	8.40586	7.87785
	std		0.403738	0.710799	0.24329	1.65777	1.07222	0.271146	0.401599	0.348375
	min		10.8013	-3.97066	1.4129	38.4799	-6.01746	1.23357	7.41065	7.00969
	max		12.6321	-0.129448	2.99038	48.3306	-0.420164	3.10756	9.60235	9.01091
	Geometrical characteristic	mean	std	min	max
	HVID	11.9892	0.403738	10.8013	12.6321
	Astigmatism	-1.71508	0.710799	-3.97066	-0.129448		mean	std	min	max
	Axis	1.68115	0.24329	1.4129	2.99038	Degrees	96.3717	13.9465	80.9942	171.423
	Sphere	43.0825	1.65777	38.4799	48.3306
	SimK_Astigmatism	-2.68166	1.07222	-6.01746	-0.420164		mean	std	min	max
	SimK_Angle	1.63027	0.271146	1.23357	3.10756	Degrees	93.4547	15.5434	70.714	178.141
	SimK_Flat_Radius	8.40586	0.401599	7.41065	9.60235
	SimK_Steep_Radius	7.87785	0.348375	7.00969	9.01091

## Sheet: OS_X
X coordinate of the limbus mm (Left eyes)
count	Name		Angle (degree)	0	1	2	3	4	5	6	7	8	9	10	11	12	13	14	15	16	17	18	19	20	21	22	23	24	25	26	27	28	29	30	31	32	33	34	35	36	37	38	39	40	41	42	43	44	45
				XL	XL	XL	XL	XL	XL	XL	XL	XL	XL	XL	XL	XL	XL	XL	XL	XL	XL	XL	XL	XL	XL	XL	XL	XL	XL	XL	XL	XL	XL	XL	XL	XL	XL	XL	XL	XL	XL	XL	XL	XL	XL	XL	XL	XL	XL
1	Anonymous participant OS 1			6.97812	6.97705	6.97387	6.96855	6.96112	6.95156	6.93989	6.9261	6.91021	6.8922	6.8721	6.84991	6.82563	6.79927	6.77084	6.74034	6.7078	6.67321	6.63658	6.59794	6.55728	6.51463	6.47	6.42339	6.37483	6.32432	6.27189	6.21755	6.16131	6.1032	6.04323	5.98141	5.91778	5.85234	5.78512	5.71614	5.64541	5.57297	5.49883	5.42301	5.34555	5.26645	5.18575	5.10347	5.01964	4.93427
2	Anonymous participant OS 2			6.58651	6.58812	6.59134	6.59375	6.59294	6.58649	6.57543	6.56237	6.54731	6.53025	6.51121	6.49018	6.46717	6.44219	6.41526	6.38636	6.35553	6.32275	6.28805	6.25144	6.21292	6.17251	6.13022	6.08606	6.04004	5.99219	5.94251	5.89102	5.83774	5.78268	5.72586	5.66729	5.607	5.545	5.48131	5.41595	5.34894	5.2803	5.21005	5.13822	5.06482	4.98988	4.91341	4.83546	4.75602	4.67514
3	Anonymous participant OS 3			6.74215	6.74112	6.73804	6.73291	6.72572	6.71649	6.70521	6.69189	6.67653	6.65914	6.63972	6.61828	6.59482	6.56935	6.54188	6.51242	6.48097	6.44755	6.41216	6.37483	6.33555	6.29434	6.25121	6.20618	6.15926	6.11046	6.05743	5.99935	5.93846	5.87695	5.81692	5.75742	5.69617	5.63318	5.56848	5.50208	5.43401	5.36428	5.29291	5.21994	5.14537	5.06923	4.99156	4.91236	4.83166	4.7495
4	Anonymous participant OS 4			6.99045	6.98939	6.98619	6.98087	6.97342	6.96385	6.95216	6.93835	6.92242	6.90439	6.88425	6.86202	6.83769	6.81129	6.78281	6.75226	6.71965	6.685	6.64832	6.6096	6.56888	6.52615	6.48144	6.43475	6.3861	6.3355	6.28298	6.22854	6.1722	6.11399	6.05391	5.99199	5.92824	5.86269	5.79535	5.72624	5.6554	5.58282	5.50855	5.4326	5.355	5.27576	5.19492	5.11249	5.02851	4.943
5	Anonymous participant OS 5			6.99324	6.99217	6.98898	6.98365	6.9762	6.96663	6.95493	6.94111	6.92518	6.90714	6.88699	6.86475	6.84042	6.814	6.78551	6.75495	6.72233	6.68767	6.65096	6.61224	6.57149	6.52875	6.48402	6.43731	6.38864	6.33803	6.28548	6.23102	6.17466	6.11642	6.05632	5.99437	5.9306	5.86502	5.79766	5.72852	5.65765	5.58505	5.51075	5.43477	5.35713	5.27786	5.19699	5.11453	5.03051	4.94497
6	Anonymous participant OS 6			6.99963	6.99857	6.99537	6.99004	6.98258	6.973	6.96129	6.94746	6.93151	6.91346	6.89329	6.87103	6.84668	6.82023	6.79171	6.76113	6.72848	6.69378	6.65705	6.61828	6.5775	6.53472	6.48995	6.4432	6.39448	6.34382	6.29123	6.23672	6.18031	6.12202	6.06186	5.99986	5.93603	5.87039	5.80296	5.73376	5.66282	5.59016	5.51579	5.43974	5.36203	5.28269	5.20174	5.11921	5.03512	4.94949
7	Anonymous participant OS 7			6.97372	6.97266	6.96947	6.96416	6.95673	6.94718	6.93552	6.92174	6.90585	6.88786	6.86777	6.84559	6.82133	6.79498	6.76657	6.7361	6.70357	6.669	6.6324	6.59378	6.55315	6.51053	6.46592	6.41934	6.37081	6.32034	6.26794	6.21363	6.15743	6.09935	6.03942	5.97765	5.91405	5.84865	5.78148	5.71254	5.64186	5.56946	5.49537	5.4196	5.34218	5.26313	5.18248	5.10026	5.01648	4.93117
8	Anonymous participant OS 8			6.9817	6.98064	6.97745	6.97214	6.9647	6.95514	6.94346	6.92966	6.91376	6.89575	6.87564	6.85343	6.82914	6.80276	6.77432	6.74381	6.71124	6.67664	6.63999	6.60133	6.56066	6.51798	6.47332	6.42669	6.3781	6.32757	6.27511	6.22074	6.16448	6.10634	6.04633	5.98449	5.92082	5.85535	5.78809	5.71908	5.64832	5.57584	5.50166	5.4258	5.34829	5.26916	5.18842	5.10609	5.02222	4.93681
9	Anonymous participant OS 9			6.98975	6.98868	6.98549	6.98017	6.97272	6.96315	6.95145	6.93764	6.92172	6.90369	6.88356	6.86132	6.837	6.8106	6.78212	6.75158	6.71897	6.68433	6.64764	6.60893	6.56821	6.52549	6.48078	6.43409	6.38545	6.33486	6.28234	6.22791	6.17158	6.11337	6.0533	5.99138	5.92764	5.86209	5.79476	5.72566	5.65482	5.58226	5.50799	5.43205	5.35446	5.27523	5.19439	5.11198	5.028	4.9425
10	Anonymous participant OS 10			6.81554	6.80903	6.7997	6.78868	6.7771	6.76611	6.75475	6.74133	6.72586	6.70833	6.68877	6.66717	6.64353	6.61788	6.5902	6.56052	6.52649	6.48724	6.445	6.40194	6.36019	6.31882	6.27553	6.23032	6.18322	6.13423	6.08117	6.02327	5.96262	5.90127	5.84116	5.78141	5.71991	5.65666	5.59168	5.52501	5.45665	5.38663	5.31497	5.24169	5.16681	5.08851	5.00619	4.92165	4.83659	4.75261
11	Anonymous participant OS 11			6.889	6.88795	6.8848	6.87956	6.87222	6.86278	6.85126	6.83765	6.82196	6.80418	6.78434	6.76243	6.73846	6.71243	6.68437	6.65426	6.62213	6.58798	6.55183	6.51368	6.47354	6.43143	6.38737	6.34136	6.29341	6.24355	6.19179	6.13814	6.08262	6.02525	5.96605	5.90502	5.8422	5.7776	5.71124	5.64314	5.57121	5.49476	5.41581	5.33631	5.25809	5.18029	5.10091	5.01997	4.93751	4.85354
12	Anonymous participant OS 12			6.97763	6.97656	6.97338	6.96806	6.96063	6.95107	6.9394	6.92562	6.90972	6.89172	6.87162	6.84943	6.82515	6.79879	6.77036	6.73987	6.70732	6.67274	6.63612	6.59748	6.55682	6.51418	6.46954	6.42294	6.37438	6.32388	6.27145	6.21711	6.16088	6.10277	6.0428	5.98099	5.91736	5.85193	5.78471	5.71574	5.64502	5.57258	5.49844	5.42263	5.34517	5.26608	5.18539	5.10311	5.01928	4.93393
13	Anonymous participant OS 13			6.82206	6.82102	6.8179	6.81271	6.80544	6.7961	6.78468	6.77121	6.75566	6.73807	6.71841	6.69672	6.67298	6.64721	6.61941	6.5896	6.55778	6.52397	6.48816	6.45038	6.41064	6.3663	6.31643	6.26352	6.21001	6.15825	6.1072	6.05428	5.99952	5.94293	5.88454	5.82435	5.76238	5.69866	5.63321	5.56604	5.49717	5.42663	5.35444	5.28061	5.20518	5.12816	5.04958	4.96946	4.88783	4.8047
14	Anonymous participant OS 14			6.97898	6.97792	6.97473	6.96942	6.96198	6.95242	6.94075	6.92696	6.91106	6.89306	6.87295	6.85076	6.82647	6.80011	6.77167	6.74118	6.70863	6.67403	6.6374	6.59876	6.5581	6.51544	6.4708	6.42418	6.37562	6.3251	6.27267	6.21832	6.16207	6.10395	6.04397	5.98215	5.91851	5.85306	5.78584	5.71685	5.64611	5.57366	5.49951	5.42369	5.34621	5.2671	5.18639	5.1041	5.02026	4.93488
15	Anonymous participant OS 15			6.98238	6.98132	6.97813	6.97281	6.96537	6.95581	6.94413	6.93034	6.91443	6.89642	6.8763	6.85409	6.8298	6.80342	6.77497	6.74446	6.7119	6.67728	6.64064	6.60197	6.56129	6.51861	6.47395	6.42732	6.37872	6.32819	6.27572	6.22135	6.16508	6.10693	6.04692	5.98507	5.92139	5.85592	5.78866	5.71963	5.64886	5.57638	5.50219	5.42633	5.34881	5.26967	5.18892	5.10659	5.0227	4.93729
16	Anonymous participant OS 16			6.99244	6.99137	6.98818	6.98286	6.97541	6.96583	6.95413	6.94032	6.92439	6.90635	6.88621	6.86397	6.83964	6.81322	6.78473	6.75418	6.72156	6.6869	6.65021	6.61148	6.57074	6.528	6.48328	6.43657	6.38791	6.3373	6.28476	6.23031	6.17396	6.11573	6.05563	5.99369	5.92992	5.86435	5.79699	5.72787	5.657	5.58441	5.51012	5.43415	5.35652	5.27726	5.1964	5.11395	5.02994	4.9444
17	Anonymous participant OS 17			6.7742	6.77317	6.77007	6.76491	6.7577	6.74842	6.73709	6.7237	6.70827	6.6908	6.67128	6.64974	6.62617	6.60058	6.57298	6.54337	6.51178	6.4782	6.44265	6.40513	6.36566	6.32426	6.28093	6.23568	6.18854	6.13951	6.08861	6.03586	5.98126	5.92485	5.86663	5.80662	5.74485	5.68132	5.61607	5.5491	5.47832	5.40301	5.32523	5.24694	5.16997	5.09348	5.01543	4.93585	4.85477	4.77221
18	Anonymous participant OS 18			6.83978	6.83608	6.82663	6.81389	6.8003	6.78832	6.77693	6.76346	6.74794	6.73036	6.71073	6.68906	6.66535	6.63961	6.61184	6.58206	6.55028	6.5165	6.48074	6.443	6.4033	6.35918	6.30974	6.25733	6.20424	6.15268	6.10167	6.04881	5.9941	5.93756	5.87922	5.81908	5.75717	5.69351	5.62811	5.561	5.49005	5.41455	5.33656	5.25807	5.18092	5.10426	5.02605	4.9463	4.86505	4.78231
19	Anonymous participant OS 19			6.7086	6.70758	6.70451	6.69941	6.69226	6.68307	6.67185	6.65859	6.64331	6.62601	6.60668	6.58534	6.562	6.53666	6.50933	6.48001	6.44872	6.41547	6.38026	6.34311	6.30402	6.26302	6.2201	6.1753	6.12861	6.08006	6.02965	5.97741	5.92334	5.86747	5.80982	5.75039	5.68921	5.6263	5.56168	5.49536	5.42737	5.35773	5.28645	5.21356	5.13909	5.06302	4.98535	4.90612	4.82535	4.74307
20	Anonymous participant OS 20			6.99794	6.99687	6.99368	6.98835	6.98089	6.97131	6.9596	6.94578	6.92984	6.91178	6.89162	6.86937	6.84502	6.81858	6.79007	6.75949	6.72685	6.69216	6.65544	6.61668	6.57591	6.53314	6.48838	6.44164	6.39294	6.34229	6.28971	6.23521	6.17881	6.12054	6.06039	5.9984	5.93459	5.86897	5.80155	5.73238	5.66145	5.5888	5.51445	5.43842	5.36073	5.28141	5.20048	5.11797	5.0339	4.94829
21	Anonymous participant OS 21			6.97994	6.97888	6.97569	6.97037	6.96294	6.95338	6.9417	6.92791	6.91201	6.894	6.8739	6.8517	6.82741	6.80104	6.7726	6.7421	6.70955	6.67495	6.63832	6.59966	6.559	6.51633	6.47169	6.42507	6.37649	6.32597	6.27353	6.21917	6.16292	6.10479	6.0448	5.98298	5.91932	5.85387	5.78663	5.71763	5.64689	5.57443	5.50027	5.42443	5.34694	5.26783	5.18711	5.1048	5.02095	4.93556
22	Anonymous participant OS 22			6.98611	6.98504	6.98185	6.97653	6.96909	6.95952	6.94784	6.93403	6.91812	6.9001	6.87997	6.85775	6.83345	6.80705	6.77859	6.74806	6.71548	6.68085	6.64418	6.6055	6.56479	6.52209	6.47741	6.43075	6.38213	6.33156	6.27907	6.22467	6.16837	6.11019	6.05015	5.98826	5.92456	5.85904	5.79175	5.72268	5.65188	5.57935	5.50513	5.42923	5.35167	5.27248	5.19169	5.10932	5.02539	4.93992
23	Anonymous participant OS 23			6.98543	6.98437	6.98118	6.97586	6.96841	6.95885	6.94716	6.93336	6.91745	6.89943	6.87931	6.85709	6.83278	6.80639	6.77793	6.74741	6.71483	6.6802	6.64354	6.60485	6.56416	6.52146	6.47678	6.43012	6.38151	6.33095	6.27846	6.22406	6.16777	6.1096	6.04956	5.98768	5.92398	5.85848	5.79118	5.72213	5.65133	5.57881	5.50459	5.4287	5.35115	5.27197	5.19119	5.10882	5.0249	4.93945
24	Anonymous participant OS 24			6.97841	6.97735	6.97416	6.96885	6.96141	6.95185	6.94018	6.92639	6.9105	6.89249	6.87239	6.8502	6.82591	6.79955	6.77112	6.74063	6.70808	6.67349	6.63686	6.59822	6.55756	6.51491	6.47027	6.42366	6.37509	6.32459	6.27215	6.21781	6.16157	6.10345	6.04348	5.98166	5.91803	5.85259	5.78536	5.71638	5.64565	5.57321	5.49906	5.42324	5.34577	5.26667	5.18597	5.10369	5.01985	4.93448
25	Anonymous participant OS 25			6.98872	6.98766	6.98447	6.97915	6.9717	6.96213	6.95044	6.93663	6.92071	6.90268	6.88255	6.86032	6.836	6.8096	6.78113	6.75059	6.71799	6.68335	6.64667	6.60797	6.56725	6.52454	6.47983	6.43315	6.38452	6.33394	6.28142	6.227	6.17068	6.11248	6.05241	5.99051	5.92677	5.86124	5.79391	5.72483	5.654	5.58144	5.50719	5.43126	5.35367	5.27446	5.19363	5.11123	5.02727	4.94177
26	Anonymous participant OS 26			6.59735	6.59635	6.59333	6.58831	6.58128	6.57225	6.56121	6.54818	6.53315	6.51613	6.49713	6.47901	6.46285	6.44599	6.42579	6.39967	6.36877	6.33593	6.30116	6.26447	6.22587	6.1881	6.15215	6.11548	6.07561	6.03012	5.98013	5.92831	5.87469	5.81928	5.7621	5.70316	5.64249	5.5801	5.516	5.45023	5.38516	5.32161	5.25737	5.19029	5.11838	5.04265	4.96538	4.88659	4.80632	4.72459
27	Anonymous participant OS 27			6.98076	6.9797	6.97651	6.9712	6.96376	6.9542	6.94252	6.92873	6.91283	6.89482	6.87471	6.85251	6.82822	6.80185	6.7734	6.7429	6.71034	6.67574	6.6391	6.60044	6.55977	6.5171	6.47245	6.42583	6.37724	6.32672	6.27427	6.21991	6.16365	6.10551	6.04552	5.98368	5.92002	5.85456	5.78732	5.71831	5.64756	5.57509	5.50092	5.42507	5.34758	5.26845	5.18772	5.10541	5.02154	4.93615
28	Anonymous participant OS 28			6.98989	6.98882	6.98563	6.98031	6.97286	6.96329	6.95159	6.93778	6.92186	6.90383	6.88369	6.86146	6.83714	6.81073	6.78226	6.75171	6.71911	6.68446	6.64778	6.60907	6.56834	6.52562	6.48091	6.43422	6.38558	6.33499	6.28247	6.22803	6.1717	6.11349	6.05342	5.9915	5.92776	5.86221	5.79488	5.72578	5.65494	5.58237	5.5081	5.43216	5.35456	5.27533	5.1945	5.11208	5.0281	4.9426
29	Anonymous participant OS 29			6.99848	6.99742	6.99422	6.98889	6.98144	6.97185	6.96015	6.94632	6.93038	6.91232	6.89216	6.8699	6.84555	6.81911	6.7906	6.76002	6.72738	6.69268	6.65595	6.6172	6.57642	6.53365	6.48888	6.44214	6.39343	6.34278	6.2902	6.2357	6.1793	6.12101	6.06087	5.99887	5.93505	5.86942	5.80201	5.73282	5.66189	5.58924	5.51488	5.43884	5.36115	5.28182	5.20089	5.11837	5.03429	4.94868
30	Anonymous participant OS 30			6.98543	6.98437	6.98118	6.97586	6.96841	6.95885	6.94716	6.93336	6.91745	6.89943	6.87931	6.85709	6.83278	6.80639	6.77793	6.74741	6.71483	6.6802	6.64354	6.60485	6.56416	6.52146	6.47678	6.43012	6.38151	6.33095	6.27846	6.22406	6.16777	6.1096	6.04956	5.98768	5.92398	5.85848	5.79118	5.72213	5.65133	5.57881	5.50459	5.4287	5.35115	5.27197	5.19119	5.10882	5.0249	4.93945
31	Anonymous participant OS 31			6.98009	6.97902	6.97583	6.97052	6.96308	6.95352	6.94185	6.92806	6.91216	6.89415	6.87404	6.85184	6.82755	6.80119	6.77275	6.74224	6.70969	6.67509	6.63846	6.5998	6.55913	6.51647	6.47182	6.4252	6.37663	6.32611	6.27366	6.2193	6.16305	6.10492	6.04493	5.9831	5.91945	5.85399	5.78675	5.71775	5.64701	5.57454	5.50038	5.42455	5.34706	5.26794	5.18721	5.10491	5.02105	4.93567
32	Anonymous participant OS 32			6.06126	6.0577	6.04865	6.03654	6.02383	6.01293	6.00283	5.99091	5.97716	5.96159	5.9442	5.925	5.904	5.8812	5.85661	5.83023	5.79954	5.76362	5.72485	5.68557	5.64806	5.61132	5.57287	5.53273	5.4909	5.4474	5.40224	5.35543	5.30699	5.25694	5.20528	5.15204	5.09723	5.04086	4.98296	4.92354	4.86049	4.7931	4.72342	4.65341	4.58491	4.51707	4.44785	4.37728	4.30538	4.23216
33	Anonymous participant OS 33			6.90723	6.90355	6.89412	6.88139	6.86779	6.85574	6.84423	6.83063	6.81496	6.7972	6.77738	6.75549	6.73154	6.70555	6.67751	6.64743	6.61534	6.58122	6.5451	6.50699	6.4669	6.42484	6.38081	6.33485	6.28696	6.23715	6.18544	6.13184	6.07638	6.01907	5.95993	5.89671	5.82866	5.75792	5.68658	5.61662	5.54713	5.47595	5.4031	5.3286	5.25248	5.17476	5.09547	5.01462	4.93225	4.84837
34	Anonymous participant OS 34			6.97425	6.97319	6.97	6.96469	6.95726	6.94771	6.93605	6.92227	6.90638	6.88839	6.8683	6.84612	6.82185	6.7955	6.76709	6.73661	6.70408	6.66951	6.63291	6.59429	6.55365	6.51103	6.46641	6.41983	6.3713	6.32082	6.26842	6.2141	6.1579	6.09982	6.03988	5.9781	5.9145	5.8491	5.78192	5.71297	5.64229	5.56989	5.49579	5.42001	5.34259	5.26354	5.18288	5.10065	5.01686	4.93154
35	Anonymous participant OS 35			6.97425	6.97319	6.97	6.96469	6.95726	6.94771	6.93605	6.92227	6.90638	6.88839	6.8683	6.84612	6.82185	6.7955	6.76709	6.73661	6.70408	6.66951	6.63291	6.59429	6.55365	6.51103	6.46641	6.41983	6.3713	6.32082	6.26842	6.2141	6.1579	6.09982	6.03988	5.9781	5.9145	5.8491	5.78192	5.71297	5.64229	5.56989	5.49579	5.42001	5.34259	5.26354	5.18288	5.10065	5.01686	4.93154
36	Anonymous participant OS 36			6.98718	6.98612	6.98293	6.97761	6.97016	6.96059	6.94891	6.9351	6.91918	6.90116	6.88103	6.85881	6.8345	6.8081	6.77963	6.7491	6.71651	6.68188	6.6452	6.60651	6.5658	6.5231	6.4784	6.43173	6.38311	6.33254	6.28004	6.22562	6.16932	6.11113	6.05108	5.98918	5.92547	5.85994	5.79264	5.72356	5.65275	5.58021	5.50597	5.43006	5.35249	5.27329	5.19249	5.1101	5.02616	4.94068
37	Anonymous participant OS 37			6.9437	6.94264	6.93947	6.93419	6.92679	6.91728	6.90566	6.89194	6.87613	6.85821	6.83821	6.81613	6.79197	6.76574	6.73744	6.7071	6.67721	6.6487	6.61925	6.58656	6.54842	6.50582	6.46125	6.4147	6.36621	6.31577	6.26341	6.20914	6.15298	6.09494	6.03505	5.97332	5.90978	5.84443	5.7773	5.70841	5.63778	5.56543	5.49139	5.41568	5.33832	5.25933	5.17874	5.09657	5.01285	4.9276
38	Anonymous participant OS 38			6.98288	6.98181	6.97862	6.97331	6.96587	6.95631	6.94462	6.93083	6.91492	6.89691	6.87679	6.85458	6.83028	6.80391	6.77546	6.74494	6.71237	6.67776	6.64111	6.60244	6.56176	6.51908	6.47441	6.42777	6.37918	6.32864	6.27617	6.22179	6.16551	6.10736	6.04735	5.98549	5.92182	5.85633	5.78907	5.72004	5.64927	5.57677	5.50258	5.42671	5.34919	5.27004	5.18929	5.10695	5.02306	4.93764
39	Anonymous participant OS 39			6.67808	6.67706	6.67401	6.66893	6.66181	6.65267	6.6415	6.6283	6.61309	6.59586	6.57663	6.55539	6.53215	6.50692	6.47971	6.45053	6.41938	6.38628	6.35123	6.31425	6.27534	6.23453	6.19181	6.14721	6.10073	6.0524	6.00222	5.95021	5.8964	5.84078	5.78339	5.72187	5.65542	5.58631	5.51669	5.44866	5.38124	5.31219	5.24152	5.16925	5.09541	5.02001	4.94309	4.86466	4.78475	4.70338
40	Anonymous participant OS 40			6.62972	6.62871	6.62568	6.62063	6.61357	6.60449	6.5934	6.5803	6.5652	6.5481	6.529	6.50791	6.48485	6.4598	6.43279	6.40382	6.3729	6.34003	6.30524	6.26852	6.2299	6.18938	6.14697	6.10269	6.05655	6.00857	5.95875	5.90712	5.8537	5.79848	5.74151	5.68044	5.6145	5.54591	5.47682	5.40928	5.34236	5.2738	5.20364	5.1319	5.05859	4.98374	4.90737	4.82951	4.75017	4.66939
41	Anonymous participant OS 41			6.99362	6.99255	6.98936	6.98403	6.97658	6.96701	6.95531	6.94149	6.92556	6.90752	6.88737	6.86513	6.84079	6.81437	6.78588	6.75532	6.7227	6.68803	6.65133	6.6126	6.57185	6.52911	6.48437	6.43766	6.38899	6.33837	6.28582	6.23136	6.175	6.11676	6.05665	5.9947	5.93092	5.86534	5.79797	5.72884	5.65796	5.58535	5.51105	5.43506	5.35742	5.27815	5.19727	5.11481	5.03079	4.94524
42	Anonymous participant OS 42			6.98905	6.98799	6.9848	6.97948	6.97203	6.96246	6.95077	6.93696	6.92104	6.90301	6.88287	6.86065	6.83633	6.80993	6.78145	6.75091	6.71831	6.68367	6.64699	6.60828	6.56756	6.52484	6.48014	6.43346	6.38482	6.33423	6.28172	6.22729	6.17097	6.11276	6.0527	5.99079	5.92705	5.86151	5.79419	5.7251	5.65426	5.58171	5.50745	5.43152	5.35393	5.27471	5.19388	5.11147	5.0275	4.94201
43	Anonymous participant OS 43			6.98324	6.98218	6.97899	6.97367	6.96623	6.95667	6.94498	6.93119	6.91528	6.89726	6.87715	6.85494	6.83064	6.80426	6.77581	6.74529	6.71272	6.6781	6.64146	6.60278	6.5621	6.51942	6.47475	6.42811	6.37951	6.32896	6.27649	6.22211	6.16583	6.10768	6.04766	5.9858	5.92212	5.85664	5.78937	5.72033	5.64956	5.57706	5.50287	5.427	5.34947	5.27032	5.18956	5.10722	5.02332	4.9379
44	Anonymous participant OS 44			6.98324	6.98218	6.97899	6.97367	6.96623	6.95667	6.94498	6.93119	6.91528	6.89726	6.87715	6.85494	6.83064	6.80426	6.77581	6.74529	6.71272	6.6781	6.64146	6.60278	6.5621	6.51942	6.47475	6.42811	6.37951	6.32896	6.27649	6.22211	6.16583	6.10768	6.04766	5.9858	5.92212	5.85664	5.78937	5.72033	5.64956	5.57706	5.50287	5.427	5.34947	5.27032	5.18956	5.10722	5.02332	4.9379
45	Anonymous participant OS 45			6.97364	6.97258	6.96939	6.96409	6.95665	6.94711	6.93544	6.92166	6.90578	6.88779	6.8677	6.84552	6.82125	6.79491	6.7665	6.73602	6.7035	6.66893	6.63233	6.59371	6.55308	6.51046	6.46585	6.41927	6.37074	6.32027	6.26787	6.21356	6.15736	6.09929	6.03935	5.97758	5.91398	5.84859	5.78141	5.71247	5.6418	5.5694	5.49531	5.41954	5.34212	5.26307	5.18243	5.1002	5.01642	4.93111
46	Anonymous participant OS 46			6.7028	6.70178	6.69872	6.69362	6.68647	6.6773	6.66608	6.65284	6.63757	6.62028	6.60097	6.57708	6.54765	6.5151	6.48179	6.45007	6.41892	6.38582	6.35078	6.3138	6.27489	6.23402	6.19115	6.14629	6.09946	6.05069	5.99999	5.94739	5.89292	5.83659	5.77844	5.71847	5.65673	5.59322	5.52799	5.46106	5.39244	5.32218	5.25029	5.1768	5.10175	5.02516	4.94705	4.86747	4.78643	4.70396
47	Anonymous participant OS 47			6.83677	6.83573	6.8326	6.8274	6.82011	6.81075	6.79932	6.78581	6.77023	6.7526	6.7329	6.70859	6.67871	6.64567	6.61183	6.57953	6.54776	6.514	6.47825	6.44053	6.40084	6.35921	6.31564	6.27014	6.22274	6.17344	6.12225	6.06921	6.01431	5.95759	5.89905	5.83871	5.77659	5.71272	5.6471	5.57976	5.51073	5.44001	5.36764	5.29363	5.21801	5.1408	5.06203	4.98171	4.89988	4.81655
48	Anonymous participant OS 48			6.99737	6.97331	6.91422	6.83972	6.76939	6.72277	6.696	6.67115	6.64656	6.62054	6.59145	6.5593	6.52523	6.48925	6.45138	6.41164	6.36948	6.32493	6.27885	6.23211	6.18553	6.13931	6.09252	6.04436	5.99401	5.94071	5.8831	5.82148	5.7575	5.69275	5.62876	5.56543	5.50141	5.43631	5.36977	5.30145	5.23138	5.15983	5.08683	5.01239	4.93656	4.85934	4.78076	4.70086	4.61966	4.53719
49	Anonymous participant OS 49			6.97787	6.97681	6.97362	6.96831	6.96087	6.95132	6.93964	6.92586	6.90996	6.89196	6.87186	6.84967	6.82539	6.79903	6.7706	6.74011	6.70756	6.67297	6.63635	6.59771	6.55705	6.5144	6.46977	6.42316	6.3746	6.3241	6.27167	6.21733	6.16109	6.10298	6.04301	5.9812	5.91757	5.85213	5.78492	5.71594	5.64522	5.57278	5.49864	5.42282	5.34536	5.26627	5.18557	5.10329	5.01946	4.9341
50	Anonymous participant OS 50			6.97791	6.97685	6.97366	6.96835	6.96092	6.95136	6.93969	6.9259	6.91	6.892	6.8719	6.84971	6.82543	6.79907	6.77064	6.74015	6.7076	6.67301	6.63639	6.59775	6.55709	6.51444	6.46981	6.4232	6.37464	6.32414	6.27171	6.21737	6.16113	6.10302	6.04305	5.98124	5.91761	5.85217	5.78495	5.71597	5.64525	5.57281	5.49867	5.42286	5.34539	5.2663	5.1856	5.10332	5.01949	4.93413
51	Anonymous participant OS 51			6.67808	6.67706	6.67401	6.66893	6.66181	6.65267	6.6415	6.6283	6.61309	6.59586	6.57663	6.55539	6.53215	6.50692	6.47971	6.45053	6.41938	6.38628	6.35123	6.31425	6.27534	6.23453	6.19181	6.14721	6.10073	6.0524	6.00222	5.95021	5.8964	5.84078	5.78339	5.72187	5.65542	5.58631	5.51669	5.44866	5.38124	5.31219	5.24152	5.16925	5.09541	5.02001	4.94309	4.86466	4.78475	4.70338
52	Anonymous participant OS 52			6.72778	6.72675	6.72368	6.71856	6.71139	6.70218	6.69092	6.67763	6.6623	6.64495	6.62557	6.60417	6.58076	6.55535	6.52793	6.49854	6.46716	6.43381	6.3985	6.36124	6.32204	6.28092	6.23789	6.19295	6.14613	6.09744	6.04689	5.99449	5.94028	5.88425	5.82643	5.76683	5.70548	5.64239	5.57758	5.51107	5.44289	5.37304	5.30156	5.22847	5.15378	5.07752	4.99971	4.92039	4.83956	4.75726
53	Anonymous participant OS 53			6.99135	6.99028	6.98709	6.98177	6.97432	6.96474	6.95305	6.93923	6.92331	6.90527	6.88513	6.8629	6.83857	6.81216	6.78367	6.75312	6.72051	6.68586	6.64917	6.61045	6.56972	6.52699	6.48226	6.43557	6.38691	6.33631	6.28378	6.22934	6.17299	6.11477	6.05468	5.99275	5.929	5.86344	5.79609	5.72698	5.65612	5.58354	5.50926	5.4333	5.35568	5.27644	5.19558	5.11315	5.02915	4.94363
54	Anonymous participant OS 54			6.98872	6.98766	6.98447	6.97915	6.9717	6.96213	6.95044	6.93663	6.92071	6.90268	6.88255	6.86032	6.836	6.8096	6.78113	6.75059	6.71799	6.68335	6.64667	6.60797	6.56725	6.52454	6.47983	6.43315	6.38452	6.33394	6.28142	6.227	6.17068	6.11248	6.05241	5.99051	5.92677	5.86124	5.79391	5.72483	5.654	5.58144	5.50719	5.43126	5.35367	5.27446	5.19363	5.11123	5.02727	4.94177
55	Anonymous participant OS 55			6.9852	6.98413	6.98094	6.97562	6.96818	6.95862	6.94693	6.93313	6.91722	6.8992	6.87908	6.85686	6.83255	6.80617	6.77771	6.74718	6.7146	6.67998	6.64332	6.60463	6.56394	6.52124	6.47656	6.42991	6.3813	6.33074	6.27825	6.22386	6.16756	6.10939	6.04936	5.98748	5.92378	5.85828	5.79099	5.72194	5.65114	5.57863	5.50441	5.42852	5.35097	5.2718	5.19101	5.10865	5.02473	4.93928
56	Anonymous participant OS 56			6.99652	6.99545	6.99226	6.98693	6.97948	6.96989	6.95819	6.94437	6.92843	6.91038	6.89023	6.86797	6.84363	6.8172	6.78869	6.75812	6.72548	6.6908	6.65408	6.61534	6.57458	6.53181	6.48706	6.44033	6.39164	6.341	6.28843	6.23394	6.17756	6.11929	6.05916	5.99719	5.93338	5.86777	5.80038	5.73121	5.6603	5.58767	5.51333	5.43732	5.35964	5.28034	5.19943	5.11693	5.03287	4.94729
57	Anonymous participant OS 57			6.97544	6.97438	6.97119	6.96588	6.95845	6.9489	6.93723	6.92345	6.90756	6.88956	6.86947	6.84728	6.82301	6.79666	6.76824	6.73776	6.70522	6.67065	6.63404	6.59541	6.55477	6.51213	6.46752	6.42093	6.37238	6.3219	6.26948	6.21516	6.15895	6.10086	6.04091	5.97912	5.91551	5.8501	5.7829	5.71395	5.64325	5.57083	5.49672	5.42094	5.3435	5.26443	5.18376	5.10151	5.01771	4.93238
58	Anonymous participant OS 58			6.94372	6.94267	6.93949	6.93421	6.92681	6.9173	6.90568	6.89197	6.87615	6.85823	6.83823	6.81615	6.79199	6.76576	6.73746	6.70712	6.67473	6.64032	6.60387	6.56542	6.52497	6.48252	6.43811	6.39173	6.34341	6.29315	6.24098	6.1869	6.13094	6.07312	6.01344	5.95193	5.88861	5.8235	5.75661	5.68796	5.61539	5.53817	5.4584	5.37811	5.2992	5.22079	5.14079	5.05923	4.97612	4.8915
59	Anonymous participant OS 59			6.9852	6.98413	6.98094	6.97562	6.96818	6.95862	6.94693	6.93313	6.91722	6.8992	6.87908	6.85686	6.83255	6.80617	6.77771	6.74718	6.7146	6.67998	6.64332	6.60463	6.56394	6.52124	6.47656	6.42991	6.3813	6.33074	6.27825	6.22386	6.16756	6.10939	6.04936	5.98748	5.92378	5.85828	5.79099	5.72194	5.65114	5.57863	5.50441	5.42852	5.35097	5.2718	5.19101	5.10865	5.02473	4.93928
60	Anonymous participant OS 60			6.96132	6.96026	6.95708	6.95178	6.94436	6.93483	6.92318	6.90943	6.89357	6.87561	6.85556	6.83342	6.80919	6.7829	6.75454	6.72411	6.69165	6.65714	6.6206	6.58205	6.5415	6.49895	6.45442	6.40793	6.35948	6.30909	6.25679	6.20258	6.14648	6.0885	6.02868	5.96701	5.90353	5.83825	5.77119	5.70238	5.62975	5.55261	5.47299	5.39277	5.31377	5.23514	5.15492	5.07313	4.98979	4.90494
61	Anonymous participant OS 61			6.63407	6.63306	6.63003	6.62498	6.61791	6.60883	6.59773	6.58462	6.56951	6.5524	6.53329	6.51219	6.4891	6.46404	6.43701	6.40802	6.37708	6.3442	6.30938	6.27264	6.23399	6.19103	6.1429	6.09188	6.04019	5.98999	5.94033	5.88886	5.8356	5.78056	5.72376	5.66521	5.60494	5.54296	5.4793	5.41396	5.34698	5.27836	5.20814	5.13633	5.06296	4.9861	4.90511	4.82191	4.73826	4.65586
62	Anonymous participant OS 62			6.99367	6.9926	6.98941	6.98409	6.97663	6.96706	6.95536	6.94154	6.92561	6.90757	6.88742	6.86518	6.84084	6.81442	6.78593	6.75537	6.72275	6.68808	6.65138	6.61264	6.5719	6.52915	6.48442	6.43771	6.38904	6.33842	6.28587	6.23141	6.17504	6.1168	6.0567	5.99475	5.93097	5.86539	5.79802	5.72888	5.658	5.58539	5.51109	5.4351	5.35746	5.27819	5.19731	5.11485	5.03083	4.94527
63	Anonymous participant OS 63			6.99283	6.99177	6.98857	6.98325	6.9758	6.96622	6.95453	6.94071	6.92478	6.90674	6.8866	6.86436	6.84002	6.81361	6.78512	6.75456	6.72194	6.68728	6.65058	6.61186	6.57112	6.52837	6.48364	6.43694	6.38827	6.33766	6.28512	6.23066	6.17431	6.11607	6.05597	5.99403	5.93026	5.86468	5.79732	5.72819	5.65732	5.58473	5.51043	5.43445	5.35682	5.27756	5.19669	5.11424	5.03022	4.94468
64	Anonymous participant OS 64			6.98223	6.98116	6.97797	6.97266	6.96522	6.95566	6.94398	6.93018	6.91428	6.89627	6.87615	6.85394	6.82965	6.80327	6.77483	6.74431	6.71175	6.67714	6.64049	6.60183	6.56115	6.51847	6.47381	6.42717	6.37858	6.32805	6.27558	6.22121	6.16494	6.10679	6.04679	5.98494	5.92127	5.85579	5.78853	5.71951	5.64874	5.57626	5.50207	5.42621	5.3487	5.26955	5.18881	5.10648	5.02259	4.93718
65	Anonymous participant OS 65			6.99963	6.99857	6.99537	6.99004	6.98258	6.973	6.96129	6.94746	6.93151	6.91346	6.89329	6.87103	6.84668	6.82023	6.79171	6.76113	6.72848	6.69378	6.65705	6.61828	6.5775	6.53472	6.48995	6.4432	6.39448	6.34382	6.29123	6.23672	6.18031	6.12202	6.06186	5.99986	5.93603	5.87039	5.80296	5.73376	5.66282	5.59016	5.51579	5.43974	5.36203	5.28269	5.20174	5.11921	5.03512	4.94949
66	Anonymous participant OS 66			6.98238	6.98132	6.97813	6.97281	6.96537	6.95581	6.94413	6.93034	6.91443	6.89642	6.8763	6.85409	6.8298	6.80342	6.77497	6.74446	6.7119	6.67728	6.64064	6.60197	6.56129	6.51861	6.47395	6.42732	6.37872	6.32819	6.27572	6.22135	6.16508	6.10693	6.04692	5.98507	5.92139	5.85592	5.78866	5.71963	5.64886	5.57638	5.50219	5.42633	5.34881	5.26967	5.18892	5.10659	5.0227	4.93729
67	Anonymous participant OS 67			6.74694	6.74319	6.7336	6.72071	6.70704	6.69512	6.68387	6.6706	6.65529	6.63795	6.61859	6.59721	6.57383	6.54844	6.52106	6.49169	6.45772	6.41819	6.37558	6.3323	6.29071	6.2498	6.20697	6.16226	6.11567	6.06722	6.01447	5.95655	5.89582	5.83451	5.77482	5.71575	5.65494	5.59241	5.52818	5.46226	5.39247	5.31807	5.2412	5.16387	5.08802	5.01273	4.93592	4.8576	4.77781	4.69656
68	Anonymous participant OS 68			6.97869	6.97763	6.97444	6.96913	6.96169	6.95213	6.94046	6.92667	6.91077	6.89277	6.87267	6.85047	6.82619	6.79983	6.77139	6.7409	6.70835	6.67375	6.63713	6.59848	6.55782	6.51517	6.47053	6.42392	6.37535	6.32484	6.2724	6.21806	6.16182	6.1037	6.04372	5.9819	5.91826	5.85282	5.7856	5.71661	5.64588	5.57343	5.49928	5.42346	5.34599	5.26688	5.18618	5.10389	5.02005	4.93468
69	Anonymous participant OS 69			6.2516	6.24786	6.23836	6.22567	6.21239	6.20108	6.19067	6.17837	6.16419	6.14813	6.1302	6.11041	6.08875	6.06523	6.03987	6.01267	5.98095	5.94375	5.90357	5.86291	5.82416	5.78628	5.74663	5.70523	5.6621	5.61724	5.57067	5.52241	5.47246	5.42084	5.36757	5.31028	5.24814	5.18345	5.1184	5.05508	4.99253	4.92847	4.8629	4.79585	4.72734	4.6574	4.58603	4.51326	4.43913	4.36363
70	Anonymous participant OS 70			6.57503	6.57403	6.57103	6.56602	6.55902	6.55001	6.53618	6.51645	6.49347	6.46984	6.44816	6.42734	6.40456	6.37982	6.35314	6.32453	6.2921	6.25483	6.21404	6.17102	6.12702	6.08124	6.03286	5.98315	5.93331	5.88452	5.83573	5.78517	5.73284	5.67877	5.62297	5.56357	5.49971	5.4329	5.3646	5.29619	5.22739	5.15709	5.0853	5.01205	4.93737	4.86127	4.7838	4.70497	4.62481	4.54335
71	Anonymous participant OS 71			6.9923	6.99124	6.98804	6.98272	6.97527	6.9657	6.954	6.94018	6.92426	6.90622	6.88608	6.86384	6.83951	6.81309	6.7846	6.75405	6.72143	6.68677	6.65008	6.61135	6.57062	6.52788	6.48315	6.43645	6.38779	6.33718	6.28464	6.23019	6.17384	6.11561	6.05551	5.99357	5.92981	5.86424	5.79688	5.72776	5.65689	5.5843	5.51001	5.43404	5.35642	5.27716	5.19629	5.11385	5.02984	4.94431
72	Anonymous participant OS 72			6.99794	6.99687	6.99368	6.98835	6.98089	6.97131	6.9596	6.94578	6.92984	6.91178	6.89162	6.86937	6.84502	6.81858	6.79007	6.75949	6.72685	6.69216	6.65544	6.61668	6.57591	6.53314	6.48838	6.44164	6.39294	6.34229	6.28971	6.23521	6.17881	6.12054	6.06039	5.9984	5.93459	5.86897	5.80155	5.73238	5.66145	5.5888	5.51445	5.43842	5.36073	5.28141	5.20048	5.11797	5.0339	4.94829
73	Anonymous participant OS 73			6.96132	6.96026	6.95708	6.95178	6.94436	6.93483	6.92318	6.90943	6.89357	6.87561	6.85556	6.83342	6.80919	6.7829	6.75454	6.72411	6.69165	6.65714	6.6206	6.58205	6.5415	6.49895	6.45442	6.40793	6.35948	6.30909	6.25679	6.20258	6.14648	6.0885	6.02868	5.96701	5.90353	5.83825	5.77119	5.70238	5.62975	5.55261	5.47299	5.39277	5.31377	5.23514	5.15492	5.07313	4.98979	4.90494
74	Anonymous participant OS 74			6.99667	6.9956	6.9924	6.98708	6.97962	6.97004	6.95834	6.94451	6.92858	6.91053	6.89037	6.86812	6.84377	6.81734	6.78884	6.75826	6.72563	6.69095	6.65423	6.61548	6.57472	6.53195	6.4872	6.44047	6.39177	6.34113	6.28856	6.23408	6.17769	6.11942	6.05929	5.99731	5.93351	5.8679	5.8005	5.73133	5.66042	5.58779	5.51345	5.43743	5.35976	5.28045	5.19954	5.11704	5.03298	4.94739
75	Anonymous participant OS 75			6.977	6.97594	6.97275	6.96744	6.96	6.95045	6.93878	6.92499	6.9091	6.8911	6.871	6.84881	6.82454	6.79818	6.76975	6.73926	6.70672	6.67214	6.63552	6.59688	6.55623	6.51359	6.46896	6.42236	6.37381	6.32331	6.27089	6.21655	6.16032	6.10222	6.04226	5.98046	5.91683	5.8514	5.78419	5.71522	5.64451	5.57208	5.49795	5.42215	5.34469	5.26561	5.18492	5.10265	5.01883	4.93348
76	Anonymous participant OS 76			6.99689	6.99583	6.99263	6.9873	6.97985	6.97027	6.95856	6.94474	6.9288	6.91075	6.89059	6.86834	6.84399	6.81756	6.78905	6.75848	6.72584	6.69116	6.65444	6.61569	6.57493	6.53216	6.4874	6.44067	6.39198	6.34134	6.28876	6.23428	6.17789	6.11962	6.05949	5.99751	5.9337	5.86809	5.80069	5.73152	5.6606	5.58797	5.51363	5.43761	5.35993	5.28062	5.1997	5.1172	5.03314	4.94755
77	Anonymous participant OS 77			6.63407	6.63306	6.63003	6.62498	6.61791	6.60883	6.59773	6.58462	6.56951	6.5524	6.53329	6.51219	6.4891	6.46404	6.43701	6.40802	6.37708	6.3442	6.30938	6.27264	6.23399	6.19103	6.1429	6.09188	6.04019	5.98999	5.94033	5.88886	5.8356	5.78056	5.72376	5.66521	5.60494	5.54296	5.4793	5.41396	5.34698	5.27836	5.20814	5.13633	5.06296	4.9861	4.90511	4.82191	4.73826	4.65586
78	Anonymous participant OS 78			6.9996	6.99853	6.99533	6.99001	6.98255	6.97296	6.96125	6.94742	6.93148	6.91342	6.89326	6.871	6.84664	6.8202	6.79168	6.76109	6.72845	6.69375	6.65701	6.61825	6.57747	6.53469	6.48992	6.44316	6.39445	6.34379	6.2912	6.23669	6.18028	6.12199	6.06183	5.99983	5.936	5.87036	5.80293	5.73374	5.66279	5.59013	5.51576	5.43971	5.362	5.28266	5.20172	5.11918	5.03509	4.94946
79	Anonymous participant OS 79			6.9923	6.99124	6.98804	6.98272	6.97527	6.9657	6.954	6.94018	6.92426	6.90622	6.88608	6.86384	6.83951	6.81309	6.7846	6.75405	6.72143	6.68677	6.65008	6.61135	6.57062	6.52788	6.48315	6.43645	6.38779	6.33718	6.28464	6.23019	6.17384	6.11561	6.05551	5.99357	5.92981	5.86424	5.79688	5.72776	5.65689	5.5843	5.51001	5.43404	5.35642	5.27716	5.19629	5.11385	5.02984	4.94431
80	Anonymous participant OS 80			6.981	6.97994	6.97675	6.97143	6.964	6.95444	6.94276	6.92897	6.91306	6.89505	6.87494	6.85274	6.82845	6.80208	6.77364	6.74313	6.71057	6.67596	6.63933	6.60067	6.56	6.51733	6.47267	6.42605	6.37746	6.32694	6.27448	6.22012	6.16386	6.10572	6.04572	5.98389	5.92022	5.85476	5.78751	5.7185	5.64775	5.57528	5.5011	5.42526	5.34776	5.26863	5.18789	5.10558	5.02171	4.93631
81	Anonymous participant OS 81			6.41098	6.4126	6.41585	6.41834	6.41766	6.41143	6.40067	6.38795	6.37329	6.35669	6.33815	6.31768	6.29528	6.27097	6.24475	6.21663	6.1891	6.1631	6.1363	6.10642	6.07123	6.03174	5.99042	5.94726	5.9023	5.85554	5.80699	5.75668	5.70461	5.6508	5.59528	5.54027	5.48658	5.4321	5.37483	5.31287	5.24714	5.1798	5.11089	5.04043	4.96842	4.89491	4.8199	4.74343	4.66551	4.58616
82	Anonymous participant OS 82			6.41098	6.4126	6.41585	6.41834	6.41766	6.41143	6.40067	6.38795	6.37329	6.35669	6.33815	6.31768	6.29528	6.27097	6.24475	6.21663	6.1891	6.1631	6.1363	6.10642	6.07123	6.03174	5.99042	5.94726	5.9023	5.85554	5.80699	5.75668	5.70461	5.6508	5.59528	5.54027	5.48658	5.4321	5.37483	5.31287	5.24714	5.1798	5.11089	5.04043	4.96842	4.89491	4.8199	4.74343	4.66551	4.58616
83	Anonymous participant OS 83			6.9437	6.94264	6.93947	6.93419	6.92679	6.91728	6.90566	6.89194	6.87613	6.85821	6.83821	6.81613	6.79197	6.76574	6.73744	6.7071	6.67721	6.6487	6.61925	6.58656	6.54842	6.50582	6.46125	6.4147	6.36621	6.31577	6.26341	6.20914	6.15298	6.09494	6.03505	5.97332	5.90978	5.84443	5.7773	5.70841	5.63778	5.56543	5.49139	5.41568	5.33832	5.25933	5.17874	5.09657	5.01285	4.9276
84	Anonymous participant OS 84			6.97384	6.97277	6.96959	6.96428	6.95685	6.9473	6.93563	6.92186	6.90597	6.88798	6.86789	6.84571	6.82144	6.7951	6.76668	6.73621	6.70368	6.66911	6.63251	6.59389	6.55326	6.51064	6.46603	6.41945	6.37092	6.32044	6.26804	6.21373	6.15753	6.09946	6.03952	5.97775	5.91415	5.84875	5.78157	5.71263	5.64195	5.56955	5.49546	5.41969	5.34227	5.26322	5.18257	5.10034	5.01656	4.93125
85	Anonymous participant OS 85			6.97841	6.97735	6.97416	6.96885	6.96141	6.95185	6.94018	6.92639	6.9105	6.89249	6.87239	6.8502	6.82591	6.79955	6.77112	6.74063	6.70808	6.67349	6.63686	6.59822	6.55756	6.51491	6.47027	6.42366	6.37509	6.32459	6.27215	6.21781	6.16157	6.10345	6.04348	5.98166	5.91803	5.85259	5.78536	5.71638	5.64565	5.57321	5.49906	5.42324	5.34577	5.26667	5.18597	5.10369	5.01985	4.93448
86	Anonymous participant OS 86			6.99039	6.98932	6.98613	6.98081	6.97336	6.96379	6.95209	6.93828	6.92236	6.90432	6.88419	6.86195	6.83763	6.81122	6.78274	6.7522	6.71959	6.68494	6.64825	6.60954	6.56882	6.52609	6.48137	6.43469	6.38604	6.33544	6.28292	6.22848	6.17215	6.11393	6.05385	5.99193	5.92819	5.86263	5.79529	5.72619	5.65534	5.58277	5.5085	5.43255	5.35495	5.27571	5.19487	5.11245	5.02846	4.94295
87	Anonymous participant OS 87			6.99405	6.99299	6.98979	6.98447	6.97702	6.96744	6.95574	6.94192	6.92599	6.90794	6.8878	6.86555	6.84122	6.8148	6.7863	6.75574	6.72312	6.68845	6.65174	6.61301	6.57226	6.52951	6.48477	6.43806	6.38939	6.33876	6.28621	6.23175	6.17538	6.11714	6.05703	5.99507	5.93129	5.86571	5.79833	5.72919	5.65831	5.5857	5.51139	5.4354	5.35776	5.27848	5.19759	5.11513	5.0311	4.94554
88	Anonymous participant OS 88			6.98203	6.98097	6.97778	6.97246	6.96502	6.95546	6.94378	6.92999	6.91408	6.89607	6.87596	6.85375	6.82946	6.80308	6.77463	6.74412	6.71156	6.67695	6.64031	6.60164	6.56096	6.51829	6.47363	6.42699	6.3784	6.32787	6.27541	6.22103	6.16477	6.10662	6.04662	5.98477	5.9211	5.85562	5.78837	5.71934	5.64858	5.5761	5.50192	5.42606	5.34855	5.26941	5.18866	5.10633	5.02245	4.93704
[truncated: 315 more columns]

## Sheet: OS_Y
Y coordinate of the limbus mm (Left eyes)
count	Name		Angle (degree)	0	1	2	3	4	5	6	7	8	9	10	11	12	13	14	15	16	17	18	19	20	21	22	23	24	25	26	27	28	29	30	31	32	33	34	35	36	37	38	39	40	41	42	43	44	45
				XL	XL	XL	XL	XL	XL	XL	XL	XL	XL	XL	XL	XL	XL	XL	XL	XL	XL	XL	XL	XL	XL	XL	XL	XL	XL	XL	XL	XL	XL	XL	XL	XL	XL	XL	XL	XL	XL	XL	XL	XL	XL	XL	XL	XL	XL
1	Anonymous participant OS 1			0	0.121785	0.243533	0.365206	0.486769	0.608183	0.729412	0.850418	0.971166	1.09162	1.21174	1.33149	1.45083	1.56973	1.68816	1.80607	1.92343	2.0402	2.15636	2.27185	2.38666	2.50073	2.61405	2.72657	2.83826	2.94908	3.059	3.168	3.27603	3.38306	3.48906	3.594	3.69784	3.80055	3.90211	4.00248	4.10163	4.19954	4.29616	4.39147	4.48545	4.57806	4.66927	4.75906	4.84741	4.93427
2	Anonymous participant OS 2			0	0.114996	0.230175	0.345564	0.461023	0.576243	0.691106	0.805758	0.920164	1.03429	1.1481	1.26156	1.37464	1.4873	1.5995	1.71122	1.82242	1.93306	2.04311	2.15254	2.26132	2.3694	2.47677	2.58338	2.6892	2.7942	2.89836	3.00163	3.10398	3.20539	3.30583	3.40525	3.50364	3.60096	3.69719	3.79229	3.88623	3.97899	4.07054	4.16085	4.24989	4.33763	4.42406	4.50914	4.59284	4.67514
3	Anonymous participant OS 3			0	0.117667	0.235298	0.352857	0.470308	0.587617	0.704746	0.821661	0.938326	1.0547	1.17076	1.28646	1.40177	1.51665	1.63107	1.745	1.85839	1.97121	2.08344	2.19503	2.30595	2.41617	2.52565	2.63437	2.74228	2.84936	2.95441	3.05682	3.15754	3.25765	3.3584	3.45941	3.55936	3.65823	3.75599	3.8526	3.94804	4.04227	4.13528	4.22702	4.31748	4.40662	4.49442	4.58085	4.66588	4.7495
4	Anonymous participant OS 4			0	0.122	0.243963	0.365852	0.487629	0.609258	0.730701	0.851922	0.972883	1.09355	1.21388	1.33384	1.4534	1.57251	1.69114	1.80926	1.92683	2.04381	2.16017	2.27587	2.39088	2.50515	2.61867	2.73139	2.84327	2.95429	3.06441	3.1736	3.28182	3.38904	3.49523	3.60035	3.70438	3.80727	3.90901	4.00956	4.10889	4.20696	4.30375	4.39923	4.49338	4.58615	4.67753	4.76748	4.85598	4.943
5	Anonymous participant OS 5			0	0.122049	0.24406	0.365998	0.487824	0.609501	0.730992	0.852261	0.973271	1.09398	1.21436	1.33437	1.45398	1.57314	1.69182	1.80998	1.9276	2.04462	2.16103	2.27678	2.39183	2.50615	2.61971	2.73248	2.84441	2.95547	3.06563	3.17486	3.28313	3.39039	3.49662	3.60178	3.70585	3.80879	3.91057	4.01116	4.11052	4.20864	4.30547	4.40099	4.49517	4.58798	4.67939	4.76938	4.85791	4.94497
6	Anonymous participant OS 6			0	0.12216	0.244284	0.366333	0.48827	0.610058	0.731661	0.853041	0.974161	1.09498	1.21547	1.33559	1.45531	1.57458	1.69336	1.81164	1.92936	2.04649	2.16301	2.27886	2.39402	2.50844	2.62211	2.73497	2.84701	2.95817	3.06844	3.17777	3.28613	3.39349	3.49982	3.60508	3.70924	3.81227	3.91415	4.01483	4.11428	4.21248	4.3094	4.40501	4.49928	4.59217	4.68367	4.77374	4.86235	4.94949
7	Anonymous participant OS 7			0	0.121708	0.243379	0.364976	0.486462	0.6078	0.728952	0.849883	0.970554	1.09093	1.21097	1.33065	1.44992	1.56875	1.6871	1.80493	1.92222	2.03892	2.155	2.27042	2.38515	2.49916	2.6124	2.72485	2.83647	2.94722	3.05708	3.166	3.27396	3.38093	3.48686	3.59173	3.69551	3.79816	3.89966	3.99996	4.09905	4.19689	4.29345	4.3887	4.48262	4.57517	4.66633	4.75607	4.84435	4.93117
8	Anonymous participant OS 8			0	0.121848	0.243658	0.365394	0.487019	0.608496	0.729787	0.850856	0.971665	1.09218	1.21236	1.33217	1.45158	1.57054	1.68903	1.807	1.92442	2.04125	2.15746	2.27302	2.38788	2.50202	2.61539	2.72797	2.83971	2.9506	3.06058	3.16963	3.27771	3.3848	3.49085	3.59584	3.69974	3.80251	3.90412	4.00454	4.10374	4.20169	4.29837	4.39373	4.48775	4.58041	4.67167	4.76151	4.8499	4.93681
9	Anonymous participant OS 9			0	0.121988	0.243939	0.365815	0.48758	0.609196	0.730627	0.851836	0.972784	1.09344	1.21376	1.33371	1.45325	1.57235	1.69097	1.80908	1.92663	2.0436	2.15995	2.27564	2.39063	2.5049	2.6184	2.73111	2.84299	2.95399	3.0641	3.17328	3.28149	3.3887	3.49487	3.59998	3.704	3.80689	3.90862	4.00915	4.10847	4.20653	4.30332	4.39879	4.49292	4.58569	4.67705	4.76699	4.85548	4.9425
10	Anonymous participant OS 10			0	0.118852	0.237451	0.355779	0.473901	0.591958	0.709953	0.827731	0.945257	1.0625	1.17941	1.29597	1.41213	1.52786	1.64312	1.75789	1.87144	1.98335	2.09411	2.20436	2.31492	2.42557	2.53548	2.64461	2.75294	2.86044	2.96598	3.06901	3.17038	3.27113	3.37239	3.47382	3.57419	3.67348	3.77164	3.86865	3.96449	4.05912	4.15251	4.24463	4.33547	4.42337	4.50759	4.58951	4.67065	4.75261
11	Anonymous participant OS 11			0	0.12023	0.240423	0.360542	0.480552	0.600416	0.720096	0.839558	0.958763	1.07768	1.19626	1.31448	1.4323	1.54969	1.6666	1.783	1.89887	2.01415	2.12882	2.24284	2.35618	2.4688	2.58066	2.69175	2.80201	2.91142	3.01994	3.12754	3.23419	3.33985	3.4445	3.5481	3.65061	3.75202	3.85228	3.95137	4.04772	4.1406	4.2313	4.32126	4.41206	4.50316	4.59288	4.6812	4.7681	4.85354
12	Anonymous participant OS 12			0	0.121776	0.243516	0.365181	0.486735	0.60814	0.729361	0.850359	0.971098	1.09154	1.21165	1.33139	1.45073	1.56962	1.68804	1.80594	1.92329	2.04006	2.15621	2.27169	2.38649	2.50056	2.61386	2.72638	2.83806	2.94887	3.05879	3.16778	3.2758	3.38282	3.48881	3.59374	3.69758	3.80029	3.90184	4.0022	4.10135	4.19924	4.29586	4.39116	4.48513	4.57773	4.66894	4.75873	4.84707	4.93393
13	Anonymous participant OS 13			0	0.119061	0.238086	0.357039	0.475883	0.594581	0.713099	0.8314	0.949447	1.0672	1.18464	1.30171	1.41839	1.53463	1.6504	1.76568	1.88041	1.99458	2.10813	2.22104	2.33328	2.44379	2.552	2.65871	2.76488	2.87164	2.97868	3.08481	3.19	3.29422	3.39744	3.49962	3.60074	3.70076	3.79965	3.89738	3.99393	4.08926	4.18334	4.27615	4.36766	4.45784	4.54666	4.6341	4.72012	4.8047
14	Anonymous participant OS 14			0	0.1218	0.243563	0.365252	0.486829	0.608258	0.729502	0.850524	0.971286	1.09175	1.21189	1.33165	1.45101	1.56993	1.68837	1.80629	1.92367	2.04046	2.15662	2.27213	2.38695	2.50104	2.61437	2.7269	2.83861	2.94944	3.05938	3.16839	3.27643	3.38348	3.48949	3.59444	3.6983	3.80102	3.9026	4.00298	4.10214	4.20005	4.29669	4.39201	4.486	4.57862	4.66985	4.75965	4.84801	4.93488
15	Anonymous participant OS 15			0	0.121859	0.243682	0.36543	0.487066	0.608555	0.729858	0.850938	0.97176	1.09229	1.21248	1.3323	1.45172	1.57069	1.68919	1.80717	1.92461	2.04145	2.15767	2.27324	2.38811	2.50226	2.61565	2.72823	2.83999	2.95088	3.06087	3.16993	3.27803	3.38513	3.49119	3.59619	3.7001	3.80288	3.9045	4.00493	4.10414	4.2021	4.29878	4.39415	4.48819	4.58085	4.67212	4.76197	4.85037	4.93729
16	Anonymous participant OS 16			0	0.122035	0.244033	0.365956	0.487768	0.609431	0.730909	0.852164	0.973159	1.09386	1.21422	1.33422	1.45381	1.57296	1.69162	1.80978	1.92738	2.04439	2.16078	2.27652	2.39156	2.50587	2.61941	2.73216	2.84408	2.95513	3.06528	3.1745	3.28275	3.39	3.49622	3.60137	3.70543	3.80836	3.91012	4.0107	4.11005	4.20816	4.30498	4.40048	4.49465	4.58745	4.67886	4.76883	4.85736	4.9444
17	Anonymous participant OS 17			0	0.118226	0.236416	0.354534	0.472544	0.59041	0.708097	0.825567	0.942786	1.05972	1.17633	1.29258	1.40844	1.52386	1.63883	1.75329	1.86722	1.98058	2.09334	2.20546	2.31691	2.42766	2.53766	2.64689	2.75531	2.8629	2.96961	3.07542	3.18029	3.2842	3.3871	3.48897	3.58978	3.68949	3.78808	3.88552	3.98023	4.07146	4.16053	4.24889	4.33812	4.42769	4.51591	4.60275	4.6882	4.77221
18	Anonymous participant OS 18			0	0.119324	0.238391	0.357101	0.475524	0.593901	0.712284	0.830449	0.948361	1.06598	1.18328	1.30022	1.41676	1.53287	1.64852	1.76366	1.87826	1.9923	2.10572	2.2185	2.33061	2.44106	2.5493	2.65608	2.76231	2.86904	2.97598	3.08202	3.18712	3.29124	3.39437	3.49646	3.59748	3.69741	3.79621	3.89386	3.98876	4.08016	4.16938	4.2579	4.34731	4.43707	4.52547	4.6125	4.69812	4.78231
19	Anonymous participant OS 19			0	0.117081	0.234127	0.351101	0.467968	0.584693	0.70124	0.817573	0.933657	1.04946	1.16494	1.28006	1.3948	1.50911	1.62296	1.73631	1.84914	1.9614	2.07307	2.18411	2.29448	2.40415	2.51309	2.62126	2.72863	2.83518	2.94086	3.04564	3.1495	3.25239	3.3543	3.45518	3.55502	3.65377	3.7514	3.84789	3.94322	4.03734	4.13023	4.22186	4.3122	4.40121	4.48883	4.57503	4.65978	4.74307
20	Anonymous participant OS 20			0	0.122131	0.244225	0.366244	0.488152	0.609911	0.731484	0.852834	0.973925	1.09472	1.21518	1.33527	1.45495	1.57419	1.69295	1.8112	1.92889	2.046	2.16248	2.27831	2.39344	2.50784	2.62147	2.73431	2.84632	2.95746	3.06769	3.177	3.28533	3.39267	3.49897	3.60421	3.70834	3.81135	3.9132	4.01385	4.11329	4.21146	4.30836	4.40395	4.49819	4.59106	4.68254	4.77258	4.86118	4.94829
21	Anonymous participant OS 21			0	0.121817	0.243596	0.365302	0.486896	0.608342	0.729602	0.850641	0.97142	1.0919	1.21205	1.33184	1.45121	1.57014	1.6886	1.80654	1.92393	2.04074	2.15692	2.27245	2.38728	2.50139	2.61473	2.72728	2.839	2.94985	3.0598	3.16883	3.27688	3.38394	3.48997	3.59493	3.6988	3.80155	3.90313	4.00353	4.10271	4.20063	4.29728	4.39262	4.48662	4.57925	4.67049	4.76031	4.84867	4.93556
22	Anonymous participant OS 22			0	0.121924	0.243812	0.365625	0.487326	0.608879	0.730247	0.851392	0.972278	1.09287	1.21312	1.33301	1.45249	1.57153	1.69009	1.80814	1.92563	2.04254	2.15883	2.27445	2.38939	2.5036	2.61704	2.72969	2.84151	2.95246	3.06251	3.17163	3.27978	3.38693	3.49305	3.59811	3.70207	3.80491	3.90658	4.00707	4.10633	4.20434	4.30108	4.3965	4.49058	4.5833	4.67462	4.76451	4.85296	4.93992
23	Anonymous participant OS 23			0	0.121913	0.243788	0.365589	0.487279	0.60882	0.730176	0.85131	0.972184	1.09276	1.21301	1.33288	1.45235	1.57138	1.68993	1.80796	1.92545	2.04234	2.15862	2.27423	2.38916	2.50335	2.61679	2.72943	2.84123	2.95217	3.06221	3.17132	3.27946	3.3866	3.49272	3.59776	3.70171	3.80454	3.9062	4.00668	4.10593	4.20394	4.30066	4.39607	4.49015	4.58286	4.67417	4.76405	4.85249	4.93945
24	Anonymous participant OS 24			0	0.12179	0.243543	0.365222	0.486789	0.608208	0.729442	0.850454	0.971207	1.09166	1.21179	1.33154	1.45089	1.5698	1.68823	1.80615	1.92351	2.04029	2.15645	2.27195	2.38676	2.50084	2.61416	2.72668	2.83837	2.9492	3.05913	3.16813	3.27616	3.3832	3.4892	3.59415	3.69799	3.80071	3.90228	4.00265	4.10181	4.19971	4.29634	4.39166	4.48564	4.57825	4.66947	4.75926	4.84761	4.93448
25	Anonymous participant OS 25			0	0.12197	0.243903	0.365762	0.487509	0.609107	0.730521	0.851711	0.972642	1.09328	1.21358	1.33351	1.45304	1.57212	1.69073	1.80881	1.92635	2.04331	2.15963	2.27531	2.39028	2.50453	2.61802	2.73071	2.84257	2.95356	3.06366	3.17281	3.28101	3.3882	3.49436	3.59946	3.70346	3.80633	3.90804	4.00857	4.10787	4.20592	4.30269	4.39815	4.49227	4.58502	4.67637	4.7663	4.85478	4.94177
26	Anonymous participant OS 26			0	0.11514	0.230244	0.345279	0.460208	0.574997	0.689611	0.804015	0.918174	1.03205	1.14562	1.25939	1.37372	1.48817	1.60213	1.71479	1.82622	1.93709	2.04737	2.15703	2.26603	2.37539	2.48563	2.59587	2.70504	2.81189	2.9167	3.02063	3.12363	3.22568	3.32675	3.42681	3.52582	3.62376	3.72059	3.81629	3.91255	4.01012	4.1075	4.20301	4.29483	4.38351	4.47085	4.55682	4.64141	4.72459
27	Anonymous participant OS 27			0	0.121831	0.243625	0.365345	0.486953	0.608414	0.729688	0.850741	0.971535	1.09203	1.2122	1.33199	1.45138	1.57033	1.6888	1.80675	1.92416	2.04098	2.15717	2.27271	2.38756	2.50168	2.61504	2.7276	2.83933	2.9502	3.06017	3.1692	3.27727	3.38434	3.49038	3.59536	3.69924	3.802	3.90359	4.004	4.10319	4.20113	4.29779	4.39314	4.48715	4.57979	4.67104	4.76087	4.84925	4.93615
28	Anonymous participant OS 28			0	0.12199	0.243943	0.365822	0.48759	0.609209	0.730642	0.851853	0.972804	1.09346	1.21378	1.33373	1.45328	1.57238	1.69101	1.80912	1.92667	2.04364	2.15999	2.27568	2.39068	2.50495	2.61846	2.73117	2.84304	2.95405	3.06416	3.17334	3.28155	3.38876	3.49494	3.60006	3.70407	3.80696	3.90869	4.00923	4.10855	4.20662	4.3034	4.39888	4.49301	4.58578	4.67715	4.76709	4.85558	4.9426
29	Anonymous participant OS 29			0	0.12214	0.244244	0.366272	0.48819	0.609958	0.731541	0.852901	0.974001	1.0948	1.21527	1.33537	1.45507	1.57432	1.69309	1.81134	1.92904	2.04616	2.16265	2.27848	2.39362	2.50803	2.62168	2.73453	2.84654	2.95769	3.06793	3.17725	3.28559	3.39293	3.49924	3.60449	3.70863	3.81165	3.9135	4.01417	4.11361	4.21179	4.3087	4.40429	4.49854	4.59142	4.6829	4.77295	4.86156	4.94868
30	Anonymous participant OS 30			0	0.121913	0.243788	0.365589	0.487279	0.60882	0.730176	0.85131	0.972184	1.09276	1.21301	1.33288	1.45235	1.57138	1.68993	1.80796	1.92545	2.04234	2.15862	2.27423	2.38916	2.50335	2.61679	2.72943	2.84123	2.95217	3.06221	3.17132	3.27946	3.3866	3.49272	3.59776	3.70171	3.80454	3.9062	4.00668	4.10593	4.20394	4.30066	4.39607	4.49015	4.58286	4.67417	4.76405	4.85249	4.93945
31	Anonymous participant OS 31			0	0.121819	0.243601	0.365309	0.486906	0.608355	0.729618	0.850658	0.97144	1.09193	1.21208	1.33186	1.45124	1.57018	1.68864	1.80658	1.92397	2.04078	2.15696	2.27249	2.38733	2.50144	2.61479	2.72734	2.83906	2.94991	3.05987	3.16889	3.27695	3.38401	3.49004	3.59501	3.69888	3.80163	3.90321	4.00361	4.10279	4.20072	4.29737	4.39271	4.48671	4.57935	4.67059	4.76041	4.84877	4.93567
32	Anonymous participant OS 32			0	0.105738	0.211223	0.316362	0.421227	0.526063	0.630923	0.735591	0.840035	0.944223	1.04812	1.1517	1.25493	1.35778	1.46022	1.56221	1.66299	1.76212	1.86012	1.9577	2.05573	2.15398	2.25159	2.3485	2.44471	2.54016	2.63485	2.72873	2.82178	2.91397	3.00527	3.09566	3.1851	3.27357	3.36105	3.4475	3.53136	3.61186	3.69034	3.76825	3.8472	3.92663	4.00487	4.08188	4.15765	4.23216
33	Anonymous participant OS 33			0	0.120502	0.240748	0.360639	0.480243	0.5998	0.719358	0.838696	0.95778	1.07657	1.19503	1.31313	1.43083	1.5481	1.66489	1.78117	1.89692	2.01208	2.12663	2.24054	2.35376	2.46626	2.57802	2.68898	2.79913	2.90843	3.01684	3.12433	3.23087	3.33643	3.44097	3.5431	3.64215	3.73924	3.83565	3.9328	4.03023	4.12642	4.22136	4.31502	4.40736	4.49835	4.58798	4.67621	4.76301	4.84837
34	Anonymous participant OS 34			0	0.121717	0.243398	0.365004	0.486499	0.607846	0.729008	0.849948	0.970628	1.09101	1.21107	1.33075	1.45003	1.56887	1.68722	1.80507	1.92236	2.03907	2.15516	2.27059	2.38533	2.49935	2.6126	2.72506	2.83668	2.94745	3.05731	3.16624	3.27421	3.38118	3.48713	3.59201	3.69579	3.79845	3.89995	4.00027	4.09936	4.19721	4.29378	4.38904	4.48296	4.57552	4.66669	4.75643	4.84472	4.93154
35	Anonymous participant OS 35			0	0.121717	0.243398	0.365004	0.486499	0.607846	0.729008	0.849948	0.970628	1.09101	1.21107	1.33075	1.45003	1.56887	1.68722	1.80507	1.92236	2.03907	2.15516	2.27059	2.38533	2.49935	2.6126	2.72506	2.83668	2.94745	3.05731	3.16624	3.27421	3.38118	3.48713	3.59201	3.69579	3.79845	3.89995	4.00027	4.09936	4.19721	4.29378	4.38904	4.48296	4.57552	4.66669	4.75643	4.84472	4.93154
36	Anonymous participant OS 36			0	0.121943	0.243849	0.365681	0.487401	0.608973	0.730359	0.851523	0.972428	1.09304	1.21331	1.33322	1.45272	1.57177	1.69035	1.80842	1.92593	2.04285	2.15916	2.2748	2.38976	2.50398	2.61744	2.73011	2.84194	2.95291	3.06298	3.17211	3.28028	3.38745	3.49359	3.59866	3.70264	3.80549	3.90718	4.00768	4.10696	4.20499	4.30174	4.39718	4.49127	4.584	4.67534	4.76525	4.8537	4.94068
37	Anonymous participant OS 37			0	0.121184	0.242332	0.363405	0.484368	0.605184	0.725815	0.846224	0.966377	1.08623	1.20576	1.32492	1.44368	1.56199	1.67983	1.79716	1.91466	2.03271	2.15072	2.26793	2.38343	2.49735	2.61051	2.72288	2.83442	2.94509	3.05487	3.16371	3.2716	3.37848	3.48434	3.58914	3.69284	3.79541	3.89684	3.99707	4.09609	4.19386	4.29035	4.38553	4.47938	4.57187	4.66296	4.75263	4.84085	4.9276
38	Anonymous participant OS 38			0	0.121868	0.243699	0.365456	0.487101	0.608598	0.729909	0.850999	0.971829	1.09236	1.21256	1.3324	1.45182	1.57081	1.68931	1.8073	1.92474	2.0416	2.15783	2.2734	2.38828	2.50244	2.61583	2.72843	2.84019	2.95109	3.06109	3.17016	3.27826	3.38537	3.49144	3.59645	3.70036	3.80315	3.90478	4.00521	4.10443	4.2024	4.29909	4.39447	4.48851	4.58118	4.67246	4.76231	4.85071	4.93764
39	Anonymous participant OS 39			0	0.116549	0.233062	0.349504	0.465839	0.582033	0.69805	0.813853	0.929409	1.04468	1.15964	1.27424	1.38845	1.50224	1.61557	1.72841	1.84073	1.95248	2.06364	2.17417	2.28404	2.39321	2.50165	2.60933	2.71622	2.82228	2.92748	3.03179	3.13517	3.2376	3.33904	3.43805	3.5339	3.62779	3.72106	3.81519	3.9097	4.00302	4.09512	4.18598	4.27555	4.36383	4.45078	4.53637	4.62058	4.70338
40	Anonymous participant OS 40			0	0.115705	0.231374	0.346973	0.462466	0.577818	0.692995	0.80796	0.922679	1.03712	1.15124	1.26501	1.3784	1.49136	1.60387	1.7159	1.8274	1.93834	2.0487	2.15843	2.2675	2.37588	2.48354	2.59044	2.69655	2.80184	2.90628	3.00983	3.11247	3.21415	3.31486	3.41316	3.50833	3.60156	3.69416	3.78762	3.88145	3.9741	4.06553	4.15573	4.24466	4.3323	4.41861	4.50359	4.58719	4.66939
41	Anonymous participant OS 41			0	0.122055	0.244074	0.366018	0.48785	0.609534	0.731032	0.852308	0.973324	1.09404	1.21443	1.33445	1.45406	1.57322	1.69191	1.81008	1.9277	2.04474	2.16115	2.2769	2.39196	2.50629	2.61986	2.73262	2.84456	2.95563	3.0658	3.17504	3.28331	3.39057	3.49681	3.60198	3.70605	3.809	3.91078	4.01137	4.11075	4.20886	4.3057	4.40123	4.49541	4.58823	4.67964	4.76964	4.85818	4.94524
42	Anonymous participant OS 42			0	0.121976	0.243914	0.365779	0.487532	0.609136	0.730555	0.851751	0.972688	1.09333	1.21364	1.33357	1.45311	1.5722	1.69081	1.8089	1.92644	2.0434	2.15974	2.27541	2.3904	2.50465	2.61815	2.73084	2.8427	2.9537	3.0638	3.17296	3.28116	3.38836	3.49453	3.59963	3.70363	3.80651	3.90823	4.00876	4.10806	4.20612	4.30289	4.39835	4.49248	4.58523	4.67659	4.76652	4.85501	4.94201
43	Anonymous participant OS 43			0	0.121874	0.243712	0.365475	0.487126	0.608629	0.729947	0.851043	0.971879	1.09242	1.21263	1.33246	1.4519	1.57089	1.6894	1.8074	1.92484	2.0417	2.15794	2.27352	2.38841	2.50257	2.61597	2.72857	2.84034	2.95124	3.06125	3.17032	3.27843	3.38554	3.49162	3.59663	3.70055	3.80334	3.90498	4.00542	4.10465	4.20262	4.29931	4.39469	4.48874	4.58142	4.6727	4.76256	4.85097	4.9379
44	Anonymous participant OS 44			0	0.121874	0.243712	0.365475	0.487126	0.608629	0.729947	0.851043	0.971879	1.09242	1.21263	1.33246	1.4519	1.57089	1.6894	1.8074	1.92484	2.0417	2.15794	2.27352	2.38841	2.50257	2.61597	2.72857	2.84034	2.95124	3.06125	3.17032	3.27843	3.38554	3.49162	3.59663	3.70055	3.80334	3.90498	4.00542	4.10465	4.20262	4.29931	4.39469	4.48874	4.58142	4.6727	4.76256	4.85097	4.9379
45	Anonymous participant OS 45			0	0.121707	0.243377	0.364972	0.486457	0.607793	0.728944	0.849873	0.970543	1.09092	1.21096	1.33063	1.4499	1.56873	1.68708	1.80491	1.9222	2.0389	2.15497	2.2704	2.38513	2.49913	2.61237	2.72482	2.83644	2.94719	3.05704	3.16597	3.27393	3.38089	3.48682	3.59169	3.69547	3.79812	3.89961	3.99992	4.099	4.19684	4.2934	4.38866	4.48257	4.57512	4.66628	4.75601	4.8443	4.93111
46	Anonymous participant OS 46			0	0.11698	0.233924	0.350798	0.467564	0.584188	0.700634	0.816866	0.93285	1.04855	1.16393	1.27845	1.39175	1.50413	1.61609	1.72829	1.8406	1.95234	2.06349	2.17402	2.28387	2.39302	2.50139	2.60894	2.71565	2.82148	2.92639	3.03035	3.13332	3.23528	3.33618	3.436	3.53471	3.63228	3.72868	3.82387	3.91784	4.01055	4.10197	4.19209	4.28088	4.3683	4.45435	4.53899	4.6222	4.70396
47	Anonymous participant OS 47			0	0.119318	0.2386	0.357809	0.476909	0.595864	0.714637	0.833192	0.951494	1.06951	1.18719	1.30402	1.4196	1.53427	1.64852	1.76298	1.87754	1.99153	2.10491	2.21765	2.32972	2.44107	2.55168	2.66152	2.77054	2.87872	2.98602	3.09242	3.19787	3.30234	3.40582	3.50825	3.60962	3.70988	3.80902	3.90699	4.00378	4.09934	4.19366	4.2867	4.37843	4.46883	4.55787	4.64552	4.73176	4.81655
48	Anonymous participant OS 48			0	0.12172	0.24145	0.358454	0.473362	0.588166	0.703778	0.819115	0.934113	1.04859	1.16225	1.275	1.38698	1.49816	1.60851	1.71799	1.82642	1.93372	2.04012	2.14589	2.25135	2.35666	2.46154	2.56568	2.66871	2.7702	2.86938	2.96619	3.06132	3.15554	3.24977	3.34405	3.43766	3.53038	3.62195	3.71211	3.80082	3.88821	3.97427	4.05896	4.14226	4.22416	4.30462	4.38363	4.46116	4.53719
49	Anonymous participant OS 49			0	0.121781	0.243524	0.365194	0.486752	0.608161	0.729386	0.850388	0.971132	1.09158	1.21169	1.33144	1.45078	1.56968	1.6881	1.80601	1.92336	2.04013	2.15628	2.27177	2.38657	2.50065	2.61396	2.72647	2.83816	2.94898	3.0589	3.16789	3.27591	3.38294	3.48894	3.59387	3.69771	3.80042	3.90198	4.00234	4.10149	4.19939	4.29601	4.39132	4.48529	4.57789	4.66911	4.7589	4.84724	4.9341
50	Anonymous participant OS 50			0	0.121781	0.243526	0.365196	0.486755	0.608165	0.729391	0.850394	0.971138	1.09159	1.2117	1.33145	1.45079	1.56969	1.68811	1.80602	1.92337	2.04014	2.15629	2.27179	2.38659	2.50066	2.61397	2.72649	2.83817	2.94899	3.05892	3.16791	3.27593	3.38296	3.48896	3.59389	3.69773	3.80044	3.902	4.00237	4.10151	4.19941	4.29603	4.39134	4.48532	4.57792	4.66914	4.75893	4.84727	4.93413
51	Anonymous participant OS 51			0	0.116549	0.233062	0.349504	0.465839	0.582033	0.69805	0.813853	0.929409	1.04468	1.15964	1.27424	1.38845	1.50224	1.61557	1.72841	1.84073	1.95248	2.06364	2.17417	2.28404	2.39321	2.50165	2.60933	2.71622	2.82228	2.92748	3.03179	3.13517	3.2376	3.33904	3.43805	3.5339	3.62779	3.72106	3.81519	3.9097	4.00302	4.09512	4.18598	4.27555	4.36383	4.45078	4.53637	4.62058	4.70338
52	Anonymous participant OS 52			0	0.117416	0.234796	0.352105	0.469306	0.586365	0.703244	0.81991	0.936326	1.05246	1.16827	1.28372	1.39878	1.51342	1.6276	1.74128	1.85443	1.96701	2.079	2.19035	2.30104	2.41102	2.52027	2.62875	2.73643	2.84328	2.94926	3.05435	3.1585	3.26169	3.36389	3.46506	3.56518	3.66421	3.76213	3.8589	3.95449	4.04888	4.14203	4.23393	4.32453	4.41382	4.50176	4.58833	4.67351	4.75726
53	Anonymous participant OS 53			0	0.122016	0.243995	0.365899	0.487692	0.609336	0.730795	0.852031	0.973007	1.09369	1.21403	1.33401	1.45358	1.57271	1.69136	1.80949	1.92708	2.04407	2.16045	2.27616	2.39118	2.50547	2.619	2.73174	2.84364	2.95467	3.0648	3.17401	3.28224	3.38947	3.49567	3.60081	3.70485	3.80776	3.90951	4.01007	4.10941	4.2075	4.3043	4.3998	4.49395	4.58674	4.67812	4.76809	4.8566	4.94363
54	Anonymous participant OS 54			0	0.12197	0.243903	0.365762	0.487509	0.609107	0.730521	0.851711	0.972642	1.09328	1.21358	1.33351	1.45304	1.57212	1.69073	1.80881	1.92635	2.04331	2.15963	2.27531	2.39028	2.50453	2.61802	2.73071	2.84257	2.95356	3.06366	3.17281	3.28101	3.3882	3.49436	3.59946	3.70346	3.80633	3.90804	4.00857	4.10787	4.20592	4.30269	4.39815	4.49227	4.58502	4.67637	4.7663	4.85478	4.94177
55	Anonymous participant OS 55			0	0.121909	0.24378	0.365577	0.487263	0.6088	0.730152	0.851281	0.972152	1.09273	1.21297	1.33284	1.4523	1.57133	1.68987	1.8079	1.92538	2.04227	2.15854	2.27416	2.38908	2.50327	2.6167	2.72933	2.84114	2.95207	3.06211	3.17121	3.27935	3.38649	3.4926	3.59764	3.70159	3.80441	3.90607	4.00654	4.1058	4.2038	4.30052	4.39593	4.49	4.5827	4.67401	4.76389	4.85233	4.93928
56	Anonymous participant OS 56			0	0.122106	0.244175	0.366169	0.488052	0.609787	0.731335	0.852661	0.973727	1.0945	1.21493	1.335	1.45466	1.57387	1.69261	1.81083	1.9285	2.04558	2.16204	2.27784	2.39295	2.50733	2.62094	2.73376	2.84574	2.95686	3.06707	3.17635	3.28467	3.39198	3.49826	3.60347	3.70759	3.81058	3.9124	4.01304	4.11245	4.21061	4.30749	4.40305	4.49728	4.59013	4.68158	4.77161	4.86019	4.94729
57	Anonymous participant OS 57			0	0.121738	0.243439	0.365066	0.486582	0.60795	0.729132	0.850092	0.970794	1.0912	1.21127	1.33098	1.45028	1.56913	1.68751	1.80538	1.92269	2.03942	2.15553	2.27098	2.38574	2.49977	2.61305	2.72552	2.83717	2.94795	3.05783	3.16678	3.27477	3.38176	3.48772	3.59262	3.69642	3.7991	3.90062	4.00095	4.10006	4.19792	4.29451	4.38979	4.48373	4.5763	4.66748	4.75724	4.84555	4.93238
58	Anonymous participant OS 58			0	0.121185	0.242332	0.363406	0.48437	0.605185	0.725817	0.846227	0.966379	1.08624	1.20576	1.32492	1.44368	1.562	1.67984	1.79717	1.91395	2.03015	2.14573	2.26066	2.37489	2.48841	2.60116	2.71313	2.82427	2.93454	3.04393	3.15238	3.25988	3.36638	3.47186	3.57628	3.67961	3.78182	3.88288	3.98276	4.07982	4.17331	4.26457	4.35511	4.44656	4.53837	4.62879	4.7178	4.80538	4.8915
59	Anonymous participant OS 59			0	0.121909	0.24378	0.365577	0.487263	0.6088	0.730152	0.851281	0.972152	1.09273	1.21297	1.33284	1.4523	1.57133	1.68987	1.8079	1.92538	2.04227	2.15854	2.27416	2.38908	2.50327	2.6167	2.72933	2.84114	2.95207	3.06211	3.17121	3.27935	3.38649	3.4926	3.59764	3.70159	3.80441	3.90607	4.00654	4.1058	4.2038	4.30052	4.39593	4.49	4.5827	4.67401	4.76389	4.85233	4.93928
60	Anonymous participant OS 60			0	0.121492	0.242946	0.364327	0.485597	0.606719	0.727656	0.848371	0.968828	1.08899	1.20882	1.32828	1.44734	1.56596	1.68409	1.80172	1.9188	2.03529	2.15116	2.26638	2.38091	2.49471	2.60775	2.72	2.83142	2.94198	3.05164	3.16037	3.26814	3.37491	3.48066	3.58534	3.68894	3.7914	3.89272	3.99285	4.09025	4.1842	4.27597	4.36698	4.45878	4.55084	4.64151	4.73077	4.81859	4.90494
61	Anonymous participant OS 61			0	0.115781	0.231526	0.347201	0.46277	0.578198	0.693449	0.80849	0.923284	1.0378	1.15199	1.26584	1.3793	1.49234	1.60493	1.71702	1.8286	1.93962	2.05004	2.15984	2.26899	2.37651	2.48189	2.58585	2.68927	2.79318	2.89729	3.00053	3.10284	3.20422	3.30461	3.404	3.50236	3.59964	3.69583	3.7909	3.88481	3.97753	4.06905	4.15932	4.24833	4.33435	4.41658	4.4965	4.57569	4.65586
62	Anonymous participant OS 62			0	0.122056	0.244076	0.36602	0.487854	0.609538	0.731038	0.852314	0.973331	1.09405	1.21444	1.33446	1.45407	1.57323	1.69192	1.81009	1.92772	2.04475	2.16116	2.27692	2.39198	2.50631	2.61987	2.73264	2.84458	2.95565	3.06582	3.17506	3.28333	3.3906	3.49683	3.60201	3.70608	3.80903	3.91081	4.0114	4.11078	4.2089	4.30573	4.40126	4.49544	4.58826	4.67968	4.76967	4.85821	4.94527
63	Anonymous participant OS 63			0	0.122042	0.244046	0.365977	0.487795	0.609466	0.73095	0.852212	0.973214	1.09392	1.21429	1.3343	1.45389	1.57305	1.69172	1.80988	1.92749	2.04451	2.1609	2.27664	2.39169	2.50601	2.61956	2.73232	2.84424	2.9553	3.06546	3.17468	3.28294	3.39019	3.49642	3.60158	3.70564	3.80857	3.91034	4.01093	4.11029	4.20839	4.30522	4.40073	4.49491	4.58771	4.67912	4.7691	4.85763	4.94468
64	Anonymous participant OS 64			0	0.121857	0.243676	0.365422	0.487056	0.608541	0.729842	0.85092	0.971738	1.09226	1.21245	1.33227	1.45169	1.57066	1.68915	1.80713	1.92456	2.04141	2.15763	2.27319	2.38806	2.50221	2.61559	2.72817	2.83993	2.95082	3.06081	3.16987	3.27796	3.38505	3.49111	3.59611	3.70002	3.80279	3.90441	4.00484	4.10405	4.20201	4.29869	4.39406	4.48809	4.58075	4.67202	4.76187	4.85026	4.93718
65	Anonymous participant OS 65			0	0.12216	0.244284	0.366333	0.48827	0.610058	0.731661	0.853041	0.974161	1.09498	1.21547	1.33559	1.45531	1.57458	1.69336	1.81164	1.92936	2.04649	2.16301	2.27886	2.39402	2.50844	2.62211	2.73497	2.84701	2.95817	3.06844	3.17777	3.28613	3.39349	3.49982	3.60508	3.70924	3.81227	3.91415	4.01483	4.11428	4.21248	4.3094	4.40501	4.49928	4.59217	4.68367	4.77374	4.86235	4.94949
66	Anonymous participant OS 66			0	0.121859	0.243682	0.36543	0.487066	0.608555	0.729858	0.850938	0.97176	1.09229	1.21248	1.3323	1.45172	1.57069	1.68919	1.80717	1.92461	2.04145	2.15767	2.27324	2.38811	2.50226	2.61565	2.72823	2.83999	2.95088	3.06087	3.16993	3.27803	3.38513	3.49119	3.59619	3.7001	3.80288	3.9045	4.00493	4.10414	4.2021	4.29878	4.39415	4.48819	4.58085	4.67212	4.76197	4.85037	4.93729
67	Anonymous participant OS 67			0	0.117703	0.235142	0.352217	0.469002	0.585747	0.702503	0.819046	0.935339	1.05135	1.16704	1.28237	1.39731	1.51183	1.62588	1.73944	1.85172	1.96224	2.07155	2.18038	2.28963	2.39907	2.50778	2.61573	2.72287	2.82919	2.93345	3.03502	3.13486	3.23412	3.33409	3.43437	3.5336	3.63175	3.7288	3.82471	3.91786	4.00745	4.09487	4.18162	4.26935	4.3575	4.44432	4.52979	4.61387	4.69656
68	Anonymous participant OS 68			0	0.121795	0.243553	0.365236	0.486809	0.608233	0.729472	0.850488	0.971246	1.09171	1.21184	1.3316	1.45095	1.56986	1.6883	1.80622	1.92359	2.04037	2.15653	2.27204	2.38685	2.50094	2.61426	2.72679	2.83849	2.94932	3.05926	3.16826	3.2763	3.38334	3.48934	3.59429	3.69814	3.80087	3.90243	4.00281	4.10197	4.19988	4.29651	4.39183	4.48581	4.57843	4.66965	4.75945	4.8478	4.93468
69	Anonymous participant OS 69			0	0.109057	0.217848	0.326274	0.434413	0.542525	0.650666	0.758609	0.866321	0.973769	1.08092	1.18774	1.2942	1.40027	1.50591	1.61109	1.71501	1.81719	1.91819	2.01876	2.11982	2.22114	2.32179	2.42173	2.52093	2.61936	2.717	2.81381	2.90976	3.00482	3.09897	3.19074	3.2794	3.36617	3.4524	3.5396	3.62729	3.71387	3.79931	3.88361	3.96671	4.04861	4.12928	4.20869	4.28681	4.36363
70	Anonymous participant OS 70			0	0.11475	0.229465	0.344111	0.458651	0.573052	0.68698	0.80012	0.912597	1.02472	1.13699	1.24935	1.36133	1.4729	1.58402	1.69465	1.80423	1.91229	2.01906	2.12485	2.23005	2.33437	2.43743	2.5397	2.64168	2.74399	2.84628	2.94769	3.04821	3.14779	3.24642	3.34293	3.4366	3.52817	3.61847	3.70843	3.79792	3.88615	3.97307	4.05868	4.14294	4.22584	4.30735	4.38746	4.46613	4.54335
71	Anonymous participant OS 71			0	0.122033	0.244028	0.365949	0.487758	0.609419	0.730895	0.852148	0.973141	1.09384	1.2142	1.33419	1.45378	1.57293	1.69159	1.80974	1.92734	2.04435	2.16074	2.27647	2.39151	2.50582	2.61936	2.73211	2.84403	2.95508	3.06522	3.17444	3.28269	3.38994	3.49615	3.6013	3.70536	3.80828	3.91005	4.01062	4.10997	4.20807	4.30489	4.4004	4.49457	4.58736	4.67876	4.76874	4.85726	4.94431
72	Anonymous participant OS 72			0	0.122131	0.244225	0.366244	0.488152	0.609911	0.731484	0.852834	0.973925	1.09472	1.21518	1.33527	1.45495	1.57419	1.69295	1.8112	1.92889	2.046	2.16248	2.27831	2.39344	2.50784	2.62147	2.73431	2.84632	2.95746	3.06769	3.177	3.28533	3.39267	3.49897	3.60421	3.70834	3.81135	3.9132	4.01385	4.11329	4.21146	4.30836	4.40395	4.49819	4.59106	4.68254	4.77258	4.86118	4.94829
73	Anonymous participant OS 73			0	0.121492	0.242946	0.364327	0.485597	0.606719	0.727656	0.848371	0.968828	1.08899	1.20882	1.32828	1.44734	1.56596	1.68409	1.80172	1.9188	2.03529	2.15116	2.26638	2.38091	2.49471	2.60775	2.72	2.83142	2.94198	3.05164	3.16037	3.26814	3.37491	3.48066	3.58534	3.68894	3.7914	3.89272	3.99285	4.09025	4.1842	4.27597	4.36698	4.45878	4.55084	4.64151	4.73077	4.81859	4.90494
74	Anonymous participant OS 74			0	0.122109	0.24418	0.366177	0.488063	0.6098	0.731351	0.852679	0.973748	1.09452	1.21496	1.33503	1.45469	1.57391	1.69265	1.81087	1.92854	2.04563	2.16209	2.27789	2.393	2.50738	2.621	2.73382	2.8458	2.95692	3.06714	3.17642	3.28474	3.39205	3.49833	3.60355	3.70767	3.81066	3.91249	4.01312	4.11254	4.2107	4.30758	4.40315	4.49737	4.59023	4.68168	4.77172	4.86029	4.94739
75	Anonymous participant OS 75			0	0.121765	0.243494	0.365148	0.486691	0.608086	0.729295	0.850282	0.971011	1.09144	1.21154	1.33127	1.4506	1.56948	1.68789	1.80578	1.92312	2.03988	2.15601	2.27149	2.38627	2.50033	2.61363	2.72613	2.8378	2.94861	3.05852	3.16749	3.2755	3.38252	3.4885	3.59342	3.69725	3.79995	3.90149	4.00184	4.10098	4.19886	4.29547	4.39077	4.48473	4.57732	4.66852	4.7583	4.84663	4.93348
76	Anonymous participant OS 76			0	0.122113	0.244188	0.366189	0.488078	0.609819	0.731374	0.852707	0.973779	1.09456	1.215	1.33507	1.45474	1.57396	1.6927	1.81093	1.9286	2.04569	2.16216	2.27797	2.39308	2.50746	2.62108	2.7339	2.84589	2.95701	3.06724	3.17652	3.28484	3.39216	3.49845	3.60367	3.70779	3.81078	3.91261	4.01325	4.11267	4.21083	4.30772	4.40329	4.49752	4.59037	4.68183	4.77187	4.86045	4.94755
77	Anonymous participant OS 77			0	0.115781	0.231526	0.347201	0.46277	0.578198	0.693449	0.80849	0.923284	1.0378	1.15199	1.26584	1.3793	1.49234	1.60493	1.71702	1.8286	1.93962	2.05004	2.15984	2.26899	2.37651	2.48189	2.58585	2.68927	2.79318	2.89729	3.00053	3.10284	3.20422	3.30461	3.404	3.50236	3.59964	3.69583	3.7909	3.88481	3.97753	4.06905	4.15932	4.24833	4.33435	4.41658	4.4965	4.57569	4.65586
78	Anonymous participant OS 78			0	0.12216	0.244282	0.366331	0.488267	0.610055	0.731657	0.853037	0.974156	1.09498	1.21547	1.33559	1.4553	1.57457	1.69336	1.81163	1.92935	2.04648	2.163	2.27885	2.394	2.50843	2.6221	2.73496	2.84699	2.95816	3.06842	3.17775	3.28611	3.39347	3.4998	3.60506	3.70922	3.81225	3.91413	4.0148	4.11426	4.21246	4.30938	4.40499	4.49926	4.59215	4.68365	4.77371	4.86233	4.94946
79	Anonymous participant OS 79			0	0.122033	0.244028	0.365949	0.487758	0.609419	0.730895	0.852148	0.973141	1.09384	1.2142	1.33419	1.45378	1.57293	1.69159	1.80974	1.92734	2.04435	2.16074	2.27647	2.39151	2.50582	2.61936	2.73211	2.84403	2.95508	3.06522	3.17444	3.28269	3.38994	3.49615	3.6013	3.70536	3.80828	3.91005	4.01062	4.10997	4.20807	4.30489	4.4004	4.49457	4.58736	4.67876	4.76874	4.85726	4.94431
80	Anonymous participant OS 80			0	0.121835	0.243633	0.365357	0.48697	0.608434	0.729713	0.85077	0.971568	1.09207	1.21224	1.33204	1.45143	1.57038	1.68886	1.80682	1.92422	2.04105	2.15725	2.27279	2.38764	2.50177	2.61513	2.72769	2.83943	2.9503	3.06027	3.16931	3.27738	3.38446	3.4905	3.59548	3.69937	3.80213	3.90373	4.00414	4.10333	4.20127	4.29793	4.39329	4.4873	4.57995	4.6712	4.76103	4.84941	4.93631
81	Anonymous participant OS 81			0	0.111932	0.224046	0.336371	0.448766	0.560928	0.672737	0.784342	0.895708	1.0068	1.11759	1.22803	1.3381	1.44777	1.55699	1.66574	1.7747	1.88425	1.99381	2.10261	2.20975	2.31537	2.42028	2.52446	2.62787	2.73048	2.83226	2.93317	3.0332	3.13229	3.23044	3.32893	3.42839	3.52765	3.62537	3.72011	3.81227	3.90326	3.99307	4.08166	4.169	4.25508	4.33986	4.42332	4.50543	4.58616
82	Anonymous participant OS 82			0	0.111932	0.224046	0.336371	0.448766	0.560928	0.672737	0.784342	0.895708	1.0068	1.11759	1.22803	1.3381	1.44777	1.55699	1.66574	1.7747	1.88425	1.99381	2.10261	2.20975	2.31537	2.42028	2.52446	2.62787	2.73048	2.83226	2.93317	3.0332	3.13229	3.23044	3.32893	3.42839	3.52765	3.62537	3.72011	3.81227	3.90326	3.99307	4.08166	4.169	4.25508	4.33986	4.42332	4.50543	4.58616
83	Anonymous participant OS 83			0	0.121184	0.242332	0.363405	0.484368	0.605184	0.725815	0.846224	0.966377	1.08623	1.20576	1.32492	1.44368	1.56199	1.67983	1.79716	1.91466	2.03271	2.15072	2.26793	2.38343	2.49735	2.61051	2.72288	2.83442	2.94509	3.05487	3.16371	3.2716	3.37848	3.48434	3.58914	3.69284	3.79541	3.89684	3.99707	4.09609	4.19386	4.29035	4.38553	4.47938	4.57187	4.66296	4.75263	4.84085	4.9276
84	Anonymous participant OS 84			0	0.12171	0.243383	0.364982	0.48647	0.60781	0.728964	0.849897	0.970571	1.09095	1.21099	1.33067	1.44994	1.56877	1.68712	1.80496	1.92225	2.03895	2.15503	2.27046	2.38519	2.4992	2.61245	2.7249	2.83652	2.94727	3.05713	3.16606	3.27402	3.38098	3.48692	3.59179	3.69557	3.79822	3.89972	4.00003	4.09912	4.19696	4.29352	4.38878	4.4827	4.57525	4.66641	4.75615	4.84443	4.93125
85	Anonymous participant OS 85			0	0.12179	0.243543	0.365222	0.486789	0.608208	0.729442	0.850454	0.971207	1.09166	1.21179	1.33154	1.45089	1.5698	1.68823	1.80615	1.92351	2.04029	2.15645	2.27195	2.38676	2.50084	2.61416	2.72668	2.83837	2.9492	3.05913	3.16813	3.27616	3.3832	3.4892	3.59415	3.69799	3.80071	3.90228	4.00265	4.10181	4.19971	4.29634	4.39166	4.48564	4.57825	4.66947	4.75926	4.84761	4.93448
86	Anonymous participant OS 86			0	0.121999	0.243961	0.365849	0.487625	0.609252	0.730694	0.851914	0.972874	1.09354	1.21387	1.33383	1.45338	1.5725	1.69113	1.80925	1.92681	2.04379	2.16015	2.27585	2.39085	2.50513	2.61865	2.73136	2.84325	2.95427	3.06438	3.17357	3.28179	3.38901	3.49519	3.60032	3.70434	3.80724	3.90898	4.00952	4.10885	4.20692	4.30371	4.39919	4.49333	4.58611	4.67748	4.76743	4.85593	4.94295
87	Anonymous participant OS 87			0	0.122063	0.244089	0.36604	0.48788	0.609572	0.731078	0.852361	0.973384	1.09411	1.2145	1.33453	1.45415	1.57332	1.69201	1.81019	1.92782	2.04486	2.16128	2.27704	2.39211	2.50644	2.62002	2.73279	2.84474	2.95581	3.06599	3.17523	3.28351	3.39078	3.49703	3.6022	3.70628	3.80923	3.91102	4.01162	4.111	4.20913	4.30597	4.4015	4.49569	4.58851	4.67993	4.76993	4.85848	4.94554
88	Anonymous participant OS 88			0	0.121853	0.243669	0.365411	0.487042	0.608524	0.729821	0.850895	0.971711	1.09223	1.21242	1.33223	1.45165	1.57062	1.68911	1.80708	1.92451	2.04135	2.15757	2.27313	2.388	2.50214	2.61551	2.7281	2.83985	2.95073	3.06072	3.16978	3.27786	3.38496	3.49102	3.59601	3.69991	3.80269	3.9043	4.00473	4.10393	4.20189	4.29857	4.39393	4.48796	4.58062	4.67189	4.76173	4.85013	4.93704
[truncated: 315 more columns]

## Sheet: OS_Z
Z coordinate of the limbus mm (Left eyes)
count	Name		Angle (degree)	0	1	2	3	4	5	6	7	8	9	10	11	12	13	14	15	16	17	18	19	20	21	22	23	24	25	26	27	28	29	30	31	32	33	34	35	36	37	38	39	40	41	42	43	44	45
				XL	XL	XL	XL	XL	XL	XL	XL	XL	XL	XL	XL	XL	XL	XL	XL	XL	XL	XL	XL	XL	XL	XL	XL	XL	XL	XL	XL	XL	XL	XL	XL	XL	XL	XL	XL	XL	XL	XL	XL	XL	XL	XL	XL	XL	XL
1	Anonymous participant OS 1			-3.27619	-3.2739	-3.27056	-3.26757	-3.26436	-3.26122	-3.25809	-3.2547	-3.25199	-3.25079	-3.24819	-3.24677	-3.24562	-3.24312	-3.24085	-3.23809	-3.23627	-3.23258	-3.23031	-3.22741	-3.22557	-3.22436	-3.22391	-3.22323	-3.2227	-3.22158	-3.22121	-3.22139	-3.22173	-3.22151	-3.22219	-3.22273	-3.22224	-3.22239	-3.22157	-3.22026	-3.21912	-3.21681	-3.21549	-3.21074	-3.20539	-3.19967	-3.19436	-3.1901	-3.1881	-3.18606
2	Anonymous participant OS 2			-2.77008	-2.77385	-2.78054	-2.78873	-2.79682	-2.80297	-2.80675	-2.81157	-2.81614	-2.81991	-2.82425	-2.8283	-2.83209	-2.83599	-2.83949	-2.84359	-2.84698	-2.85184	-2.85596	-2.85979	-2.86423	-2.86815	-2.8715	-2.87517	-2.87795	-2.88082	-2.88457	-2.88811	-2.89175	-2.89524	-2.89889	-2.90239	-2.90541	-2.90834	-2.91134	-2.91418	-2.91629	-2.9176	-2.91842	-2.9185	-2.91774	-2.91602	-2.91479	-2.91293	-2.91107	-2.9097
3	Anonymous participant OS 3			-2.98945	-2.98836	-2.98711	-2.98393	-2.98205	-2.98018	-2.97827	-2.97698	-2.97558	-2.97425	-2.97305	-2.97203	-2.97194	-2.97207	-2.97317	-2.97418	-2.97502	-2.97532	-2.97625	-2.97693	-2.9762	-2.97592	-2.97598	-2.97576	-2.97553	-2.97464	-2.97191	-2.9663	-2.95871	-2.95175	-2.94862	-2.94857	-2.9476	-2.94666	-2.94647	-2.94456	-2.9438	-2.94319	-2.94397	-2.94383	-2.9439	-2.9442	-2.94511	-2.9459	-2.94541	-2.94483
4	Anonymous participant OS 4			-3.56645	-3.56644	-3.56671	-3.56814	-3.56891	-3.57139	-3.57278	-3.57467	-3.57453	-3.57298	-3.57202	-3.57122	-3.57139	-3.5713	-3.57071	-3.56961	-3.56946	-3.5669	-3.5668	-3.56516	-3.56396	-3.56155	-3.55977	-3.55723	-3.55471	-3.55145	-3.54798	-3.54445	-3.5407	-3.53648	-3.53308	-3.52879	-3.52261	-3.5179	-3.51184	-3.50475	-3.49808	-3.48998	-3.48279	-3.47407	-3.46655	-3.45762	-3.44872	-3.44229	-3.43723	-3.43045
5	Anonymous participant OS 5			-3.39606	-3.39465	-3.39413	-3.39404	-3.39341	-3.39366	-3.39389	-3.39361	-3.39409	-3.39389	-3.3942	-3.39449	-3.39518	-3.39586	-3.39632	-3.39671	-3.39797	-3.39738	-3.39877	-3.39872	-3.39927	-3.39908	-3.39881	-3.39837	-3.39681	-3.39568	-3.39383	-3.39134	-3.38915	-3.38635	-3.38362	-3.38152	-3.37728	-3.37385	-3.37006	-3.36717	-3.36543	-3.36293	-3.36139	-3.35984	-3.3586	-3.35797	-3.35743	-3.35697	-3.35722	-3.35646
6	Anonymous participant OS 6			-3.15331	-3.15293	-3.15246	-3.15244	-3.15277	-3.15323	-3.15366	-3.15347	-3.15413	-3.15418	-3.15437	-3.15457	-3.1554	-3.15522	-3.15585	-3.15634	-3.15809	-3.15859	-3.16109	-3.16314	-3.1657	-3.16767	-3.16982	-3.17185	-3.17402	-3.17546	-3.17735	-3.17899	-3.18109	-3.18295	-3.18549	-3.18754	-3.18926	-3.19161	-3.19282	-3.19415	-3.19492	-3.19488	-3.19394	-3.19288	-3.19221	-3.19299	-3.19257	-3.19301	-3.19497	-3.19661
7	Anonymous participant OS 7			-3.11102	-3.11283	-3.11443	-3.1169	-3.12219	-3.12659	-3.13039	-3.13442	-3.13886	-3.1415	-3.14436	-3.14609	-3.14875	-3.14904	-3.14995	-3.14974	-3.15016	-3.14881	-3.14829	-3.14723	-3.14688	-3.14632	-3.14573	-3.14449	-3.14459	-3.14243	-3.14191	-3.14016	-3.13864	-3.13751	-3.13735	-3.13512	-3.13406	-3.13286	-3.13093	-3.12883	-3.12667	-3.12398	-3.11967	-3.11641	-3.11216	-3.10741	-3.10288	-3.09605	-3.08692	-3.07781
8	Anonymous participant OS 8			NaN	NaN	NaN	NaN	NaN	NaN	NaN	NaN	NaN	NaN	NaN	NaN	-3.71827	-3.72914	-3.73977	-3.74979	-3.76407	-3.77536	-3.78445	-3.79492	-3.80221	-3.80786	-3.81368	-3.81728	-3.82122	-3.82177	-3.82159	-3.82091	-3.82054	-3.81794	-3.81665	-3.81554	-3.81179	-3.80765	-3.80217	-3.79675	-3.79097	-3.78391	-3.77646	-3.76958	-3.76302	-3.75721	-3.75148	-3.74596	-3.74148	-3.73866
9	Anonymous participant OS 9			-3.06446	-3.06571	-3.06633	-3.06766	-3.07045	-3.07531	-3.08378	-3.09294	-3.10347	-3.1115	-3.11827	-3.12688	-3.13368	-3.13938	-3.14485	-3.14868	-3.15278	-3.15428	-3.15679	-3.1575	-3.15802	-3.15789	-3.1584	-3.15857	-3.16014	-3.16121	-3.16254	-3.16417	-3.16558	-3.1665	-3.16792	-3.16908	-3.16948	-3.16919	-3.16926	-3.16909	-3.16963	-3.16896	-3.1689	-3.16866	-3.16885	-3.16848	-3.16849	-3.16936	-3.16937	-3.16802
10	Anonymous participant OS 10			-3.29258	-3.28529	-3.27801	-3.27117	-3.26621	-3.26371	-3.26333	-3.2636	-3.26375	-3.26369	-3.26348	-3.26377	-3.26378	-3.26362	-3.26357	-3.26419	-3.2623	-3.25716	-3.25206	-3.24748	-3.24576	-3.24668	-3.24725	-3.24831	-3.2493	-3.24962	-3.24852	-3.24311	-3.23777	-3.23229	-3.22936	-3.229	-3.22779	-3.22662	-3.2244	-3.22212	-3.21902	-3.21617	-3.2112	-3.20719	-3.20226	-3.19328	-3.1804	-3.16724	-3.155	-3.14301
11	Anonymous participant OS 11			-3.15759	-3.1596	-3.16189	-3.16353	-3.16494	-3.16653	-3.16926	-3.17367	-3.17868	-3.18361	-3.18785	-3.19149	-3.19436	-3.19748	-3.19977	-3.2024	-3.20448	-3.20716	-3.20899	-3.21108	-3.21453	-3.21908	-3.22481	-3.23133	-3.23735	-3.24388	-3.25074	-3.25648	-3.2626	-3.26816	-3.27331	-3.27787	-3.28251	-3.28678	-3.29037	-3.29455	-3.2961	-3.29304	-3.2884	-3.28514	-3.2846	-3.2865	-3.28831	-3.28906	-3.2895	-3.28908
12	Anonymous participant OS 12			-3.39994	-3.39971	-3.39894	-3.39858	-3.39939	-3.39979	-3.39982	-3.39989	-3.40041	-3.40089	-3.40147	-3.40175	-3.40284	-3.40286	-3.40417	-3.40504	-3.40651	-3.40684	-3.40785	-3.40891	-3.41071	-3.41246	-3.41408	-3.41612	-3.41867	-3.42008	-3.42214	-3.42325	-3.42398	-3.4248	-3.42671	-3.42747	-3.42979	-3.43192	-3.43309	-3.4336	-3.43297	-3.43171	-3.42969	-3.42811	-3.42704	-3.42872	-3.42948	-3.43024	-3.43122	-3.43243
13	Anonymous participant OS 13			-2.8933	-2.89351	-2.89407	-2.89455	-2.89503	-2.8958	-2.896	-2.89704	-2.89752	-2.89851	-2.89914	-2.90044	-2.90304	-2.90624	-2.9098	-2.91371	-2.91737	-2.92043	-2.92408	-2.92761	-2.93108	-2.93221	-2.93012	-2.92688	-2.92527	-2.92607	-2.92956	-2.93268	-2.93618	-2.9394	-2.94237	-2.94554	-2.94877	-2.9517	-2.95487	-2.95832	-2.96154	-2.96438	-2.96678	-2.9692	-2.97066	-2.97198	-2.9729	-2.97328	-2.97342	-2.97379
14	Anonymous participant OS 14			-2.9641	-2.96452	-2.96433	-2.96424	-2.9645	-2.96509	-2.96569	-2.9683	-2.97	-2.97292	-2.9756	-2.97852	-2.98178	-2.98521	-2.98856	-2.99207	-2.99654	-2.99929	-3.00263	-3.00575	-3.0085	-3.01136	-3.01406	-3.01564	-3.0181	-3.0196	-3.02172	-3.02281	-3.02366	-3.02476	-3.02625	-3.02678	-3.02815	-3.02924	-3.03063	-3.03195	-3.03277	-3.03427	-3.03545	-3.03727	-3.03916	-3.04163	-3.04367	-3.04621	-3.0489	-3.05136
15	Anonymous participant OS 15			-3.19074	-3.19888	-3.20651	-3.21357	-3.22023	-3.22692	-3.23253	-3.23939	-3.2452	-3.25247	-3.25792	-3.26393	-3.27012	-3.27599	-3.2823	-3.28791	-3.29408	-3.29824	-3.30304	-3.30727	-3.31175	-3.31765	-3.3244	-3.33145	-3.33992	-3.34791	-3.35674	-3.36518	-3.37235	-3.37969	-3.38695	-3.39243	-3.39864	-3.40461	-3.41005	-3.41544	-3.41998	-3.42494	-3.42932	-3.43382	-3.43817	-3.44243	-3.44634	-3.45045	-3.45421	-3.4579
16	Anonymous participant OS 16			-3.50044	-3.50139	-3.50183	-3.5026	-3.50459	-3.50664	-3.50856	-3.51068	-3.51302	-3.51591	-3.51869	-3.52261	-3.52915	-3.53522	-3.54219	-3.54785	-3.55345	-3.5558	-3.55704	-3.55725	-3.55792	-3.55741	-3.55681	-3.5551	-3.55399	-3.55083	-3.54887	-3.54581	-3.54282	-3.53923	-3.53669	-3.53264	-3.52884	-3.52588	-3.5218	-3.51804	-3.51333	-3.50922	-3.50441	-3.49998	-3.49563	-3.49324	-3.48881	-3.48564	-3.48255	-3.4794
17	Anonymous participant OS 17			-3.26605	-3.26343	-3.2618	-3.25962	-3.2594	-3.25783	-3.25733	-3.25661	-3.25615	-3.25467	-3.25425	-3.25387	-3.25366	-3.2532	-3.2533	-3.25462	-3.25538	-3.25591	-3.25725	-3.25835	-3.25861	-3.25955	-3.26053	-3.26011	-3.26115	-3.26104	-3.26177	-3.26206	-3.26325	-3.26407	-3.26464	-3.26579	-3.26616	-3.2676	-3.26846	-3.26963	-3.26777	-3.26278	-3.25614	-3.25129	-3.24924	-3.2493	-3.25006	-3.2499	-3.24997	-3.24963
18	Anonymous participant OS 18			-3.23246	-3.23048	-3.22491	-3.21809	-3.21314	-3.21037	-3.21091	-3.21043	-3.21012	-3.21056	-3.20882	-3.20788	-3.20755	-3.20626	-3.20525	-3.20467	-3.20282	-3.20147	-3.19994	-3.19867	-3.19771	-3.19467	-3.18824	-3.18013	-3.1736	-3.16982	-3.16823	-3.16689	-3.16459	-3.16292	-3.16113	-3.15882	-3.15657	-3.15516	-3.15352	-3.15176	-3.14839	-3.14149	-3.13222	-3.12365	-3.11639	-3.11049	-3.10368	-3.09589	-3.08643	-3.07695
19	Anonymous participant OS 19			-2.90975	-2.91057	-2.91267	-2.91423	-2.91669	-2.91893	-2.92158	-2.92393	-2.92476	-2.92645	-2.92754	-2.92882	-2.92998	-2.93226	-2.93377	-2.93595	-2.93846	-2.93959	-2.94205	-2.94399	-2.9467	-2.95099	-2.95438	-2.95802	-2.96086	-2.96501	-2.97095	-2.97833	-2.98572	-2.99347	-3.00117	-3.00834	-3.01573	-3.02232	-3.02783	-3.03316	-3.0383	-3.04328	-3.04761	-3.05198	-3.05698	-3.06128	-3.06599	-3.06944	-3.0739	-3.07793
20	Anonymous participant OS 20			-3.3633	-3.36253	-3.3617	-3.36064	-3.3594	-3.35851	-3.35818	-3.35766	-3.35719	-3.35747	-3.35698	-3.35737	-3.35753	-3.3575	-3.35751	-3.358	-3.35819	-3.35758	-3.3577	-3.35764	-3.35734	-3.35754	-3.35724	-3.35766	-3.35756	-3.35709	-3.35665	-3.35637	-3.35562	-3.35556	-3.35602	-3.35632	-3.35694	-3.35763	-3.35825	-3.35818	-3.35825	-3.3581	-3.35744	-3.3571	-3.35619	-3.35583	-3.35491	-3.35305	-3.35173	-3.34961
21	Anonymous participant OS 21			-3.59605	-3.59582	-3.59657	-3.5991	-3.60053	-3.602	-3.60281	-3.60222	-3.6003	-3.59905	-3.59737	-3.59342	-3.58857	-3.58397	-3.57733	-3.57172	-3.56568	-3.55786	-3.55152	-3.54246	-3.53376	-3.52681	-3.51582	-3.50559	-3.49704	-3.48698	-3.47222	-3.49591	-3.59486	NaN	NaN	NaN	NaN	NaN	NaN	NaN	NaN	NaN	NaN	NaN	NaN	NaN	NaN	NaN	NaN	NaN
22	Anonymous participant OS 22			-3.00522	-3.01777	-3.01614	-3.01349	-3.01143	-3.00981	-3.00746	-3.00581	-3.00372	-3.00288	-3.00147	-3.00001	-2.99911	-2.99783	-2.99723	-2.99648	-2.99667	-2.99558	-2.99536	-2.99481	-2.99476	-2.99435	-2.99416	-2.99321	-2.99325	-2.99232	-2.99218	-2.99117	-2.99024	-2.98926	-2.98874	-2.98729	-2.98659	-2.98641	-2.98628	-2.986	-2.9857	-2.98582	-2.9854	-2.98527	-2.98477	-2.9848	-2.98386	-2.98329	-2.9825	-2.98068
23	Anonymous participant OS 23			-3.03236	-3.02992	-3.02672	-3.02383	-3.02144	-3.01948	-3.01774	-3.01574	-3.01442	-3.01339	-3.01356	-3.01423	-3.01476	-3.01561	-3.01668	-3.01802	-3.01934	-3.02017	-3.02077	-3.02217	-3.0232	-3.02479	-3.02617	-3.02723	-3.02863	-3.02919	-3.03006	-3.03096	-3.03118	-3.03221	-3.03239	-3.03298	-3.03284	-3.03286	-3.03274	-3.03247	-3.03199	-3.0319	-3.03172	-3.03133	-3.03053	-3.02876	-3.02751	-3.02705	-3.02518	-3.02323
24	Anonymous participant OS 24			-3.21383	-3.2157	-3.21756	-3.22013	-3.2236	-3.22706	-3.23	-3.23268	-3.23554	-3.23788	-3.23969	-3.2405	-3.24075	-3.23909	-3.23789	-3.23657	-3.23548	-3.23412	-3.23374	-3.23369	-3.23434	-3.23497	-3.23543	-3.23606	-3.23708	-3.23689	-3.23665	-3.23666	-3.23651	-3.23648	-3.23668	-3.23615	-3.2364	-3.23712	-3.23747	-3.23778	-3.23776	-3.2378	-3.23788	-3.23721	-3.23655	-3.23527	-3.23387	-3.23209	-3.23002	-3.22717
25	Anonymous participant OS 25			-3.27403	-3.27051	-3.2666	-3.26105	-3.25487	-3.24894	-3.24084	-3.23076	-3.21968	-3.20565	-3.18903	-3.17007	-3.14631	-3.1182	-3.08853	-3.05674	-3.02371	-2.98634	-2.95054	-2.92369	NaN	NaN	NaN	NaN	NaN	NaN	NaN	NaN	NaN	NaN	NaN	NaN	NaN	NaN	NaN	NaN	NaN	NaN	NaN	NaN	NaN	NaN	NaN	NaN	NaN	NaN
26	Anonymous participant OS 26			-2.7965	-2.79437	-2.7916	-2.78872	-2.78527	-2.78219	-2.77899	-2.77616	-2.77223	-2.76928	-2.76579	-2.76475	-2.76656	-2.7702	-2.77199	-2.77105	-2.76682	-2.7635	-2.75981	-2.75613	-2.75257	-2.75043	-2.7513	-2.75284	-2.7528	-2.74937	-2.74332	-2.7367	-2.73083	-2.72529	-2.71953	-2.71417	-2.70873	-2.70365	-2.69754	-2.69246	-2.6896	-2.68942	-2.69104	-2.69179	-2.68945	-2.68551	-2.68204	-2.67838	-2.67575	-2.6724
27	Anonymous participant OS 27			-3.0357	-3.03364	-3.03143	-3.02996	-3.02849	-3.0283	-3.02827	-3.02788	-3.02798	-3.02852	-3.02857	-3.02897	-3.0301	-3.0302	-3.03076	-3.03113	-3.03244	-3.03231	-3.03382	-3.03414	-3.03549	-3.03649	-3.03799	-3.03942	-3.0408	-3.04189	-3.04281	-3.04422	-3.0454	-3.04565	-3.046	-3.04616	-3.04513	-3.04372	-3.04129	-3.03794	-3.0345	-3.03044	-3.02595	-3.01952	-3.01267	-3.00421	-2.99526	-2.9852	-2.97511	-2.96384
28	Anonymous participant OS 28			-3.21629	-3.21754	-3.21936	-3.22048	-3.22276	-3.22458	-3.22497	-3.22383	-3.22103	-3.21888	-3.21484	-3.21121	-3.20566	-3.20072	-3.19852	-3.19454	-3.19097	-3.18503	-3.18039	-3.17257	-3.16395	-3.15566	-3.14452	-3.13311	-3.12188	-3.11087	-3.10319	-3.09366	-3.08715	-3.08222	-3.08056	-3.08115	-3.08056	-3.08538	NaN	NaN	NaN	NaN	NaN	NaN	NaN	NaN	NaN	NaN	NaN	NaN
29	Anonymous participant OS 29			-3.21951	-3.21859	-3.21838	-3.21865	-3.21787	-3.21831	-3.2187	-3.21856	-3.21897	-3.21919	-3.21929	-3.21975	-3.2198	-3.21971	-3.21966	-3.21955	-3.21999	-3.21871	-3.21874	-3.21767	-3.2178	-3.21691	-3.21581	-3.21444	-3.21299	-3.21158	-3.2101	-3.20865	-3.20747	-3.20674	-3.20613	-3.20683	-3.20579	-3.20682	-3.20656	-3.20754	-3.20795	-3.20796	-3.20871	-3.20869	-3.20839	-3.20867	-3.20773	-3.20712	-3.20695	-3.20477
30	Anonymous participant OS 30			-3.03236	-3.02992	-3.02672	-3.02383	-3.02144	-3.01948	-3.01774	-3.01574	-3.01442	-3.01339	-3.01356	-3.01423	-3.01476	-3.01561	-3.01668	-3.01802	-3.01934	-3.02017	-3.02077	-3.02217	-3.0232	-3.02479	-3.02617	-3.02723	-3.02863	-3.02919	-3.03006	-3.03096	-3.03118	-3.03221	-3.03239	-3.03298	-3.03284	-3.03286	-3.03274	-3.03247	-3.03199	-3.0319	-3.03172	-3.03133	-3.03053	-3.02876	-3.02751	-3.02705	-3.02518	-3.02323
31	Anonymous participant OS 31			-3.10498	-3.1055	-3.10529	-3.10535	-3.10617	-3.10684	-3.10744	-3.10747	-3.10836	-3.1089	-3.10979	-3.11124	-3.11404	-3.11605	-3.11921	-3.12189	-3.1248	-3.12656	-3.12918	-3.13086	-3.13343	-3.13557	-3.13691	-3.1387	-3.14078	-3.14266	-3.14541	-3.14744	-3.14965	-3.15171	-3.15405	-3.15525	-3.15682	-3.15892	-3.15948	-3.16067	-3.16079	-3.16096	-3.16127	-3.16128	-3.16078	-3.16089	-3.15966	-3.15872	-3.15776	-3.15561
32	Anonymous participant OS 32			-2.5716	-2.57027	-2.56627	-2.56137	-2.55845	-2.55814	-2.56007	-2.56286	-2.56475	-2.56789	-2.57135	-2.57495	-2.57919	-2.58395	-2.5898	-2.59443	-2.59695	-2.59767	-2.59583	-2.59556	-2.59878	-2.60397	-2.6085	-2.61385	-2.61844	-2.62231	-2.62607	-2.63049	-2.63348	-2.63557	-2.63848	-2.64026	-2.64191	-2.64365	-2.64574	-2.64651	-2.64543	-2.64112	-2.63474	-2.62979	-2.62808	-2.62803	-2.62775	-2.62684	-2.62628	-2.62523
33	Anonymous participant OS 33			-3.19185	-3.18873	-3.18101	-3.17377	-3.16594	-3.16306	-3.16211	-3.1605	-3.15995	-3.15855	-3.15766	-3.1561	-3.15442	-3.15334	-3.15123	-3.14958	-3.14727	-3.1457	-3.14267	-3.13987	-3.13788	-3.13532	-3.13246	-3.12993	-3.12689	-3.12245	-3.11834	-3.11325	-3.10875	-3.10394	-3.09888	-3.09043	-3.08008	-3.06835	-3.05716	-3.04993	-3.04547	-3.0411	-3.0358	-3.03132	-3.02719	-3.02287	-3.01974	-3.01693	-3.01363	-3.01071
34	Anonymous participant OS 34			-3.13714	-3.13471	-3.13316	-3.13107	-3.12847	-3.12632	-3.12425	-3.12204	-3.12104	-3.11993	-3.11937	-3.11919	-3.11814	-3.11753	-3.11733	-3.11706	-3.11713	-3.11717	-3.11704	-3.11717	-3.11751	-3.11835	-3.11907	-3.12016	-3.12173	-3.12343	-3.12492	-3.12689	-3.12796	-3.12972	-3.13032	-3.13146	-3.13301	-3.1348	-3.13727	-3.13936	-3.1411	-3.14248	-3.14351	-3.14389	-3.14397	-3.14417	-3.14391	-3.14416	-3.14435	-3.14418
35	Anonymous participant OS 35			-3.13714	-3.13471	-3.13316	-3.13107	-3.12847	-3.12632	-3.12425	-3.12204	-3.12104	-3.11993	-3.11937	-3.11919	-3.11814	-3.11753	-3.11733	-3.11706	-3.11713	-3.11717	-3.11704	-3.11717	-3.11751	-3.11835	-3.11907	-3.12016	-3.12173	-3.12343	-3.12492	-3.12689	-3.12796	-3.12972	-3.13032	-3.13146	-3.13301	-3.1348	-3.13727	-3.13936	-3.1411	-3.14248	-3.14351	-3.14389	-3.14397	-3.14417	-3.14391	-3.14416	-3.14435	-3.14418
36	Anonymous participant OS 36			-3.57642	-3.57755	-3.5779	-3.57791	-3.57776	-3.57836	-3.57841	-3.57799	-3.57849	-3.57908	-3.5792	-3.58032	-3.58104	-3.58096	-3.58238	-3.58321	-3.58509	-3.58507	-3.58557	-3.58536	-3.58568	-3.58513	-3.58427	-3.58311	-3.58196	-3.57932	-3.57734	-3.57392	-3.56905	-3.56281	-3.55618	-3.54913	-3.54052	-3.53452	-3.52715	-3.5206	-3.51297	-3.50461	-3.49799	-3.49036	-3.48267	-3.47688	-3.46938	-3.46181	-3.45528	-3.44736
37	Anonymous participant OS 37			-3.31698	-3.32179	-3.32914	-3.33861	-3.35064	-3.36341	-3.3719	-3.3763	-3.37953	-3.38329	-3.38758	-3.39326	-3.39959	-3.4041	-3.40795	-3.41131	-3.41673	-3.42572	-3.43562	-3.44448	-3.45018	-3.45249	-3.45546	-3.45729	-3.46016	-3.45975	-3.45816	-3.45611	-3.45287	-3.44981	-3.44781	-3.44417	-3.44131	-3.43422	-3.42406	-3.41482	-3.40671	-3.40092	-3.39557	-3.39177	-3.38821	-3.38467	-3.38107	-3.37604	-3.36981	-3.36417
38	Anonymous participant OS 38			-3.32749	-3.32295	-3.31795	-3.31371	-3.31039	-3.30859	-3.30642	-3.30389	-3.3017	-3.29945	-3.29679	-3.29452	-3.29252	-3.28932	-3.28715	-3.28469	-3.2824	-3.27841	-3.27505	-3.27102	-3.26774	-3.26366	-3.25908	-3.25489	-3.25001	-3.24407	-3.23999	-3.2363	-3.2327	-3.22949	-3.22709	-3.22429	-3.22154	-3.22016	-3.21737	-3.21493	-3.2122	-3.20964	-3.20672	-3.20347	-3.20006	-3.19666	-3.19295	-3.18825	-3.18584	-3.18144
39	Anonymous participant OS 39			-2.78189	-2.7797	-2.77809	-2.7771	-2.77667	-2.77623	-2.77616	-2.77583	-2.77495	-2.775	-2.77397	-2.77327	-2.77322	-2.77316	-2.77259	-2.77277	-2.77412	-2.77375	-2.77441	-2.775	-2.77581	-2.77693	-2.77802	-2.77952	-2.78051	-2.78157	-2.78302	-2.78406	-2.78479	-2.78608	-2.78746	-2.78763	-2.7851	-2.78295	-2.78077	-2.78206	-2.78519	-2.78765	-2.79043	-2.793	-2.79503	-2.79623	-2.797	-2.79867	-2.80019	-2.80126
40	Anonymous participant OS 40			-3.11374	-3.1158	-3.11865	-3.12311	-3.12761	-3.1313	-3.13466	-3.13852	-3.14161	-3.14503	-3.14949	-3.15381	-3.15888	-3.16354	-3.16806	-3.17298	-3.17644	-3.18055	-3.18289	-3.1851	-3.18767	-3.19052	-3.194	-3.19754	-3.20079	-3.20441	-3.20752	-3.21015	-3.2124	-3.21152	-3.21065	-3.20725	-3.20023	-3.19142	-3.18461	-3.17901	-3.17716	-3.17405	-3.17118	-3.16813	-3.16462	-3.1618	-3.15778	-3.15444	-3.14979	-3.14683
41	Anonymous participant OS 41			-3.88679	-3.8879	-3.88918	-3.89021	-3.89083	-3.89287	-3.89429	-3.89454	-3.89401	-3.89228	-3.8892	-3.88672	-3.88426	-3.88235	-3.88094	-3.87998	-3.88025	-3.87875	-3.87939	-3.87839	-3.87883	-3.87881	-3.87885	-3.87972	-3.88058	-3.88015	-3.88062	-3.88038	-3.88063	-3.88067	-3.88021	-3.8804	-3.87802	-3.87732	-3.8741	-3.87201	-3.86934	-3.86588	-3.86283	-3.85874	-3.85498	-3.85154	-3.84625	-3.84105	-3.83676	-3.83161
42	Anonymous participant OS 42			-3.47631	-3.47451	-3.47291	-3.47198	-3.46932	-3.46718	-3.465	-3.46175	-3.45925	-3.45629	-3.45357	-3.45018	-3.44676	-3.44345	-3.43708	-3.43009	-3.42283	-3.41414	-3.40708	-3.40021	-3.39562	-3.39124	-3.38653	-3.38201	-3.37607	-3.37109	-3.36483	-3.35925	-3.35447	-3.35037	-3.34627	-3.34353	-3.34009	-3.33766	-3.33474	-3.33188	-3.32803	-3.32354	-3.31832	-3.31469	-3.31141	-3.30821	-3.30422	-3.29962	-3.29484	-3.29055
43	Anonymous participant OS 43			-3.29279	-3.29227	-3.29125	-3.29095	-3.29042	-3.29041	-3.2901	-3.28974	-3.28945	-3.28953	-3.2893	-3.28933	-3.29027	-3.29007	-3.29038	-3.29026	-3.29123	-3.28974	-3.28921	-3.2866	-3.28376	-3.27979	-3.27614	-3.27161	-3.2664	-3.26117	-3.25552	-3.25112	-3.24765	-3.24579	-3.24452	-3.24317	-3.24079	-3.23913	-3.23653	-3.23434	-3.23289	-3.23033	-3.22845	-3.22633	-3.22498	-3.22353	-3.22185	-3.22085	-3.22011	-3.21971
44	Anonymous participant OS 44			-3.29279	-3.29227	-3.29125	-3.29095	-3.29042	-3.29041	-3.2901	-3.28974	-3.28945	-3.28953	-3.2893	-3.28933	-3.29027	-3.29007	-3.29038	-3.29026	-3.29123	-3.28974	-3.28921	-3.2866	-3.28376	-3.27979	-3.27614	-3.27161	-3.2664	-3.26117	-3.25552	-3.25112	-3.24765	-3.24579	-3.24452	-3.24317	-3.24079	-3.23913	-3.23653	-3.23434	-3.23289	-3.23033	-3.22845	-3.22633	-3.22498	-3.22353	-3.22185	-3.22085	-3.22011	-3.21971
45	Anonymous participant OS 45			-3.40921	-3.41058	-3.41325	-3.41595	-3.4188	-3.42176	-3.42519	-3.42756	-3.43102	-3.43421	-3.43682	-3.4402	-3.44343	-3.44638	-3.4499	-3.45311	-3.45703	-3.4591	-3.46245	-3.46486	-3.46799	-3.47092	-3.47316	-3.47509	-3.47756	-3.47898	-3.48113	-3.48253	-3.48359	-3.48488	-3.48628	-3.4871	-3.4879	-3.48939	-3.48982	-3.49078	-3.49037	-3.49091	-3.49118	-3.49137	-3.49138	-3.49133	-3.49098	-3.49063	-3.49063	-3.48997
46	Anonymous participant OS 46			-3.4686	-3.46594	-3.46374	-3.46227	-3.46016	-3.45893	-3.45722	-3.45462	-3.45273	-3.45136	-3.4489	-3.44328	-3.43434	-3.42313	-3.41329	-3.40527	-3.40176	-3.39378	-3.38479	-3.36942	-3.35026	-3.32712	-3.3022	-3.27383	-3.24116	-3.20665	-3.16914	-3.13413	-3.09838	-3.11421	-3.18769	-3.37483	NaN	NaN	NaN	NaN	NaN	NaN	NaN	NaN	NaN	NaN	NaN	NaN	NaN	NaN
47	Anonymous participant OS 47			-3.315	-3.31089	-3.30693	-3.30331	-3.29974	-3.29687	-3.29471	-3.29302	-3.29191	-3.29094	-3.29083	-3.28765	-3.28077	-3.27311	-3.26615	-3.26333	-3.26188	-3.2613	-3.25972	-3.25663	-3.25358	-3.24983	-3.24703	-3.24326	-3.24059	-3.23699	-3.23577	-3.23511	-3.23423	-3.23211	-3.23087	-3.22995	-3.22808	-3.22584	-3.22358	-3.22141	-3.21885	-3.2162	-3.21527	-3.2148	-3.21456	-3.21326	-3.21292	-3.21026	-3.20726	-3.20468
48	Anonymous participant OS 48			-3.02416	-3.00139	-2.94921	-2.88493	-2.8266	-2.79142	-2.77695	-2.76663	-2.75809	-2.75063	-2.74261	-2.73414	-2.72603	-2.71735	-2.70879	-2.70066	-2.69194	-2.6836	-2.67416	-2.66696	-2.66069	-2.6561	-2.65247	-2.64884	-2.64475	-2.64027	-2.63343	-2.62477	-2.61573	-2.60752	-2.60118	-2.59697	-2.59301	-2.59016	-2.58678	-2.58363	-2.58078	-2.57736	-2.57392	-2.57035	-2.56706	-2.56386	-2.56065	-2.55768	-2.55383	-2.55059
49	Anonymous participant OS 49			-3.28621	-3.28422	-3.28173	-3.28001	-3.2773	-3.27485	-3.27225	-3.27005	-3.26818	-3.26612	-3.26275	-3.25891	-3.25667	-3.25368	-3.25015	-3.24703	-3.24397	-3.23982	-3.23641	-3.2325	-3.22828	-3.22492	-3.22221	-3.21859	-3.21657	-3.2144	-3.21261	-3.21185	-3.2096	-3.20748	-3.2065	-3.20649	-3.2059	-3.20516	-3.20502	-3.20535	-3.20565	-3.20475	-3.20407	-3.20437	-3.20574	-3.20688	-3.20818	-3.20953	-3.21165	-3.21461
50	Anonymous participant OS 50			-3.32091	-3.32372	-3.32581	-3.32765	-3.33023	-3.33232	-3.33406	-3.33528	-3.33767	-3.33955	-3.34184	-3.34452	-3.34865	-3.35091	-3.35443	-3.35787	-3.36176	-3.36433	-3.36876	-3.37195	-3.37674	-3.38085	-3.38431	-3.38899	-3.3927	-3.39565	-3.40001	-3.40306	-3.40617	-3.4093	-3.41313	-3.4148	-3.41742	-3.42044	-3.4223	-3.42501	-3.4271	-3.42938	-3.43075	-3.43227	-3.43289	-3.43322	-3.43293	-3.43352	-3.43458	-3.43503
51	Anonymous participant OS 51			-2.78189	-2.7797	-2.77809	-2.7771	-2.77667	-2.77623	-2.77616	-2.77583	-2.77495	-2.775	-2.77397	-2.77327	-2.77322	-2.77316	-2.77259	-2.77277	-2.77412	-2.77375	-2.77441	-2.775	-2.77581	-2.77693	-2.77802	-2.77952	-2.78051	-2.78157	-2.78302	-2.78406	-2.78479	-2.78608	-2.78746	-2.78763	-2.7851	-2.78295	-2.78077	-2.78206	-2.78519	-2.78765	-2.79043	-2.793	-2.79503	-2.79623	-2.797	-2.79867	-2.80019	-2.80126
52	Anonymous participant OS 52			-2.64167	-2.64524	-2.65233	-2.65974	-2.66585	-2.67363	-2.68111	-2.68913	-2.69776	-2.7054	-2.71379	-2.72108	-2.72833	-2.73498	-2.74191	-2.74942	-2.75722	-2.76353	-2.77168	-2.77995	-2.7876	-2.79547	-2.80378	-2.81107	-2.81851	-2.82603	-2.83331	-2.83968	-2.84748	-2.85507	-2.86269	-2.87185	-2.88015	-2.88904	-2.89704	-2.90601	-2.9142	-2.92235	-2.93065	-2.94008	-2.94928	-2.95807	-2.967	-2.97628	-2.98709	-2.99686
53	Anonymous participant OS 53			-3.28746	-3.28937	-3.29203	-3.29478	-3.29708	-3.29977	-3.30232	-3.30391	-3.30538	-3.30702	-3.30789	-3.30933	-3.31005	-3.31033	-3.31048	-3.3111	-3.31225	-3.31235	-3.31321	-3.31386	-3.31445	-3.31542	-3.31644	-3.31784	-3.32044	-3.32145	-3.32253	-3.32277	-3.32255	-3.32444	-3.32774	-3.32997	-3.33279	-3.33617	-3.33929	-3.34228	-3.34549	-3.34857	-3.35126	-3.35455	-3.35771	-3.36059	-3.36377	-3.36709	-3.37022	-3.37356
54	Anonymous participant OS 54			-3.48938	-3.4849	-3.48083	-3.47723	-3.47348	-3.4716	-3.47027	-3.46891	-3.46814	-3.4681	-3.46768	-3.4682	-3.46851	-3.46786	-3.46829	-3.46846	-3.46964	-3.46945	-3.47053	-3.4713	-3.47311	-3.47436	-3.47616	-3.47859	-3.48076	-3.48251	-3.4851	-3.48657	-3.4879	-3.4884	-3.48875	-3.48791	-3.48517	-3.4831	-3.4764	-3.46725	-3.45515	-3.44204	-3.42962	-3.41589	-3.40124	-3.38543	-3.36856	-3.35142	-3.33917	-3.32435
55	Anonymous participant OS 55			-3.18482	-3.18392	-3.18239	-3.18104	-3.17952	-3.17796	-3.17631	-3.17521	-3.17424	-3.17406	-3.17372	-3.17307	-3.17316	-3.17276	-3.1721	-3.17161	-3.17199	-3.17048	-3.17056	-3.16973	-3.16922	-3.16838	-3.16847	-3.16735	-3.16693	-3.16581	-3.16471	-3.16372	-3.16284	-3.16155	-3.16085	-3.15957	-3.15755	-3.15477	-3.15152	-3.14822	-3.1451	-3.14128	-3.13685	-3.1322	-3.12778	-3.12347	-3.11684	-3.11064	-3.10446	-3.09841
56	Anonymous participant OS 56			-3.38288	-3.38013	-3.37682	-3.37391	-3.37123	-3.36864	-3.36622	-3.36355	-3.3615	-3.35936	-3.35805	-3.35643	-3.35552	-3.35376	-3.35314	-3.35236	-3.35278	-3.35159	-3.35181	-3.3513	-3.3517	-3.35177	-3.35191	-3.35175	-3.35234	-3.35209	-3.35274	-3.35295	-3.35354	-3.3537	-3.35442	-3.35417	-3.35402	-3.35464	-3.3545	-3.35442	-3.35388	-3.35279	-3.35161	-3.35045	-3.34848	-3.34747	-3.34545	-3.34491	-3.3445	-3.34343
57	Anonymous participant OS 57			-2.92056	-2.92112	-2.92262	-2.92431	-2.92527	-2.92617	-2.9276	-2.92792	-2.92841	-2.92821	-2.92764	-2.92681	-2.9251	-2.92168	-2.91821	-2.91257	-2.90324	-2.88696	-2.86479	-2.84006	-2.81274	-2.78464	-2.75471	-2.72219	-2.68941	-2.65801	-2.63037	-2.60721	-2.59359	-2.60538	NaN	NaN	NaN	NaN	NaN	NaN	NaN	NaN	NaN	NaN	NaN	NaN	NaN	NaN	NaN	NaN
58	Anonymous participant OS 58			-2.89462	-2.89211	-2.88947	-2.88769	-2.88557	-2.88363	-2.88189	-2.88015	-2.87783	-2.87634	-2.87513	-2.8728	-2.87161	-2.87002	-2.86892	-2.86658	-2.86562	-2.86392	-2.86226	-2.85965	-2.85646	-2.85196	-2.84728	-2.84213	-2.83648	-2.83055	-2.8242	-2.81814	-2.8123	-2.80534	-2.79933	-2.79263	-2.78678	-2.78091	-2.7756	-2.76924	-2.76373	-2.75521	-2.747	-2.74026	-2.73495	-2.73253	-2.73084	-2.72901	-2.72614	-2.72585
59	Anonymous participant OS 59			-3.18482	-3.18392	-3.18239	-3.18104	-3.17952	-3.17796	-3.17631	-3.17521	-3.17424	-3.17406	-3.17372	-3.17307	-3.17316	-3.17276	-3.1721	-3.17161	-3.17199	-3.17048	-3.17056	-3.16973	-3.16922	-3.16838	-3.16847	-3.16735	-3.16693	-3.16581	-3.16471	-3.16372	-3.16284	-3.16155	-3.16085	-3.15957	-3.15755	-3.15477	-3.15152	-3.14822	-3.1451	-3.14128	-3.13685	-3.1322	-3.12778	-3.12347	-3.11684	-3.11064	-3.10446	-3.09841
60	Anonymous participant OS 60			-3.36546	-3.3655	-3.36501	-3.36506	-3.36538	-3.36604	-3.36612	-3.36673	-3.36628	-3.36742	-3.36749	-3.36806	-3.36822	-3.36826	-3.36817	-3.36837	-3.36961	-3.37066	-3.37217	-3.37409	-3.3759	-3.37868	-3.37973	-3.37876	-3.37671	-3.37242	-3.36803	-3.36348	-3.35888	-3.35437	-3.35028	-3.3451	-3.34028	-3.33653	-3.33361	-3.32979	-3.32402	-3.31454	-3.30515	-3.2958	-3.29019	-3.28675	-3.28312	-3.27896	-3.27494	-3.27028
61	Anonymous participant OS 61			-3.03659	-3.03648	-3.03657	-3.0369	-3.03817	-3.04038	-3.04193	-3.04255	-3.04269	-3.04134	-3.03895	-3.03581	-3.03312	-3.03103	-3.02959	-3.02862	-3.0292	-3.02859	-3.02889	-3.02846	-3.02819	-3.02581	-3.01987	-3.01303	-3.00677	-3.00458	-3.00425	-3.00413	-3.00275	-3.00185	-3.00149	-2.99995	-2.99971	-2.99815	-2.99632	-2.99537	-2.99333	-2.9906	-2.98745	-2.98452	-2.98092	-2.97487	-2.96535	-2.95603	-2.94648	-2.94011
62	Anonymous participant OS 62			-3.71786	-3.72281	-3.72763	-3.7316	-3.73561	-3.73985	-3.74865	-3.7575	-3.7674	-3.7762	-3.78633	-3.79625	-3.80454	-3.81032	-3.81855	-3.82624	-3.83301	-3.83949	-3.84836	-3.85547	-3.86343	-3.87136	-3.87771	-3.88218	-3.88983	-3.89549	-3.90069	-3.90339	-3.90388	-3.89974	-3.89667	-3.89148	-3.88688	-3.88182	-3.87983	-3.8796	-3.8786	-3.87842	-3.87901	-3.8791	-3.87833	-3.8792	-3.87739	-3.87771	-3.87818	-3.87826
63	Anonymous participant OS 63			-3.65882	-3.63097	-3.59998	-3.56542	-3.52694	-3.48435	-3.43777	-3.38766	-3.33501	-3.31525	-3.31348	-3.31233	-3.31183	-3.31185	-3.31142	-3.31134	-3.31222	-3.31139	-3.31252	-3.3122	-3.31264	-3.3123	-3.31193	-3.3114	-3.31064	-3.31027	-3.30905	-3.30792	-3.30809	-3.30784	-3.30801	-3.30774	-3.30648	-3.30585	-3.30458	-3.30272	-3.30087	-3.29839	-3.2976	-3.29571	-3.2944	-3.29174	-3.28836	-3.28455	-3.28093	-3.27587
64	Anonymous participant OS 64			-3.09601	-3.09464	-3.09168	-3.08915	-3.0868	-3.08489	-3.08329	-3.08264	-3.08146	-3.08185	-3.08166	-3.08191	-3.08229	-3.08259	-3.08264	-3.08321	-3.08469	-3.08471	-3.0855	-3.08642	-3.08729	-3.08844	-3.09041	-3.09237	-3.09549	-3.09752	-3.10014	-3.10186	-3.10361	-3.10482	-3.10627	-3.1065	-3.10728	-3.1075	-3.10797	-3.10807	-3.10774	-3.10833	-3.10853	-3.10817	-3.10764	-3.10716	-3.10608	-3.10538	-3.10431	-3.10312
65	Anonymous participant OS 65			-3.15331	-3.15293	-3.15246	-3.15244	-3.15277	-3.15323	-3.15366	-3.15347	-3.15413	-3.15418	-3.15437	-3.15457	-3.1554	-3.15522	-3.15585	-3.15634	-3.15809	-3.15859	-3.16109	-3.16314	-3.1657	-3.16767	-3.16982	-3.17185	-3.17402	-3.17546	-3.17735	-3.17899	-3.18109	-3.18295	-3.18549	-3.18754	-3.18926	-3.19161	-3.19282	-3.19415	-3.19492	-3.19488	-3.19394	-3.19288	-3.19221	-3.19299	-3.19257	-3.19301	-3.19497	-3.19661
66	Anonymous participant OS 66			-2.94079	-2.94063	-2.94	-2.93953	-2.93871	-2.93854	-2.93836	-2.93797	-2.93746	-2.93814	-2.93778	-2.93834	-2.93878	-2.93885	-2.93932	-2.94003	-2.94072	-2.94194	-2.94367	-2.94518	-2.94648	-2.94855	-2.95003	-2.95299	-2.9567	-2.9605	-2.96471	-2.96808	-2.97142	-2.97487	-2.97844	-2.98116	-2.9838	-2.98685	-2.99022	-2.99262	-2.99577	-2.99838	-3.00093	-3.0055	-3.00801	-3.01035	-3.01309	-3.0154	-3.01733	-3.02036
67	Anonymous participant OS 67			-3.27281	-3.26938	-3.2633	-3.25582	-3.24981	-3.24771	-3.24776	-3.24843	-3.24875	-3.25034	-3.25106	-3.25165	-3.25159	-3.25128	-3.2519	-3.25236	-3.25076	-3.24456	-3.23876	-3.23266	-3.23128	-3.2316	-3.23158	-3.23216	-3.23248	-3.23228	-3.23027	-3.22421	-3.21673	-3.20985	-3.20674	-3.20605	-3.20475	-3.20498	-3.20441	-3.20502	-3.20281	-3.19641	-3.18897	-3.18193	-3.17742	-3.1756	-3.173	-3.17175	-3.16967	-3.16713
68	Anonymous participant OS 68			-3.12865	-3.13614	-3.1432	-3.14897	-3.15344	-3.15783	-3.16156	-3.16585	-3.1697	-3.1729	-3.17578	-3.17801	-3.18053	-3.18168	-3.18335	-3.18431	-3.1861	-3.18653	-3.18777	-3.1881	-3.18885	-3.18913	-3.18896	-3.18847	-3.18804	-3.18658	-3.18578	-3.18439	-3.18267	-3.18094	-3.17935	-3.17669	-3.17464	-3.17222	-3.16801	-3.16382	-3.1589	-3.15487	-3.15103	-3.14718	-3.14297	-3.13847	-3.13285	-3.12758	-3.12223	-3.11576
69	Anonymous participant OS 69			-2.32418	-2.32211	-2.31562	-2.30889	-2.30229	-2.29834	-2.29701	-2.29489	-2.29375	-2.29324	-2.29284	-2.29254	-2.29179	-2.29084	-2.29088	-2.29025	-2.28721	-2.28196	-2.27531	-2.26938	-2.26708	-2.26699	-2.26655	-2.26668	-2.26629	-2.26698	-2.26656	-2.26688	-2.26723	-2.26758	-2.26809	-2.26668	-2.26215	-2.25786	-2.25361	-2.25313	-2.25473	-2.25588	-2.25781	-2.25886	-2.26063	-2.2619	-2.26308	-2.2638	-2.26377	-2.26427
70	Anonymous participant OS 70			-2.64341	-2.64383	-2.64451	-2.64522	-2.64549	-2.64623	-2.6443	-2.64021	-2.63524	-2.63174	-2.63198	-2.63339	-2.6358	-2.63757	-2.6405	-2.64277	-2.64324	-2.64123	-2.63804	-2.6345	-2.63194	-2.63003	-2.62725	-2.62484	-2.62346	-2.62398	-2.62637	-2.62791	-2.62985	-2.63076	-2.63295	-2.63212	-2.62916	-2.62506	-2.62122	-2.61748	-2.61523	-2.61297	-2.6108	-2.60775	-2.60413	-2.60021	-2.59464	-2.58857	-2.58115	-2.57494
71	Anonymous participant OS 71			-3.33868	-3.33825	-3.33826	-3.33821	-3.33779	-3.33803	-3.3374	-3.33581	-3.33431	-3.33192	-3.32899	-3.3259	-3.32157	-3.31741	-3.31283	-3.30839	-3.30521	-3.30011	-3.29669	-3.29238	-3.28941	-3.28491	-3.28132	-3.27774	-3.27421	-3.27128	-3.26901	-3.26581	-3.26328	-3.26	-3.25703	-3.25392	-3.25075	-3.24815	-3.24527	-3.24375	-3.24049	-3.23781	-3.23644	-3.23323	-3.2309	-3.22985	-3.22703	-3.22438	-3.223	-3.21926
72	Anonymous participant OS 72			-3.3633	-3.36253	-3.3617	-3.36064	-3.3594	-3.35851	-3.35818	-3.35766	-3.35719	-3.35747	-3.35698	-3.35737	-3.35753	-3.3575	-3.35751	-3.358	-3.35819	-3.35758	-3.3577	-3.35764	-3.35734	-3.35754	-3.35724	-3.35766	-3.35756	-3.35709	-3.35665	-3.35637	-3.35562	-3.35556	-3.35602	-3.35632	-3.35694	-3.35763	-3.35825	-3.35818	-3.35825	-3.3581	-3.35744	-3.3571	-3.35619	-3.35583	-3.35491	-3.35305	-3.35173	-3.34961
73	Anonymous participant OS 73			-3.36546	-3.3655	-3.36501	-3.36506	-3.36538	-3.36604	-3.36612	-3.36673	-3.36628	-3.36742	-3.36749	-3.36806	-3.36822	-3.36826	-3.36817	-3.36837	-3.36961	-3.37066	-3.37217	-3.37409	-3.3759	-3.37868	-3.37973	-3.37876	-3.37671	-3.37242	-3.36803	-3.36348	-3.35888	-3.35437	-3.35028	-3.3451	-3.34028	-3.33653	-3.33361	-3.32979	-3.32402	-3.31454	-3.30515	-3.2958	-3.29019	-3.28675	-3.28312	-3.27896	-3.27494	-3.27028
74	Anonymous participant OS 74			-3.10442	-3.10855	-3.11262	-3.1182	-3.12306	-3.12973	-3.13585	-3.14153	-3.14838	-3.15432	-3.16009	-3.16658	-3.17215	-3.17756	-3.1833	-3.18884	-3.1953	-3.2008	-3.20715	-3.21349	-3.22004	-3.22578	-3.23166	-3.23679	-3.24154	-3.24612	-3.25042	-3.25418	-3.25799	-3.26107	-3.2637	-3.26728	-3.26879	-3.27192	-3.27331	-3.2755	-3.27675	-3.27779	-3.27979	-3.2805	-3.2806	-3.28122	-3.27939	-3.27698	-3.27461	-3.27145
75	Anonymous participant OS 75			-3.23296	-3.23535	-3.23844	-3.24134	-3.24486	-3.24745	-3.24984	-3.25292	-3.25426	-3.25808	-3.26054	-3.2637	-3.26678	-3.26968	-3.27276	-3.27637	-3.28014	-3.28283	-3.28565	-3.28898	-3.29106	-3.29433	-3.29754	-3.29984	-3.30276	-3.30484	-3.30788	-3.3094	-3.31018	-3.31097	-3.31226	-3.31227	-3.31297	-3.31236	-3.31262	-3.31233	-3.3121	-3.31263	-3.31334	-3.31409	-3.31462	-3.31554	-3.31623	-3.31667	-3.31714	-3.31801
76	Anonymous participant OS 76			-3.1807	-3.17938	-3.17909	-3.17933	-3.179	-3.17979	-3.18067	-3.18085	-3.18172	-3.18132	-3.18142	-3.18136	-3.18163	-3.18229	-3.18237	-3.18306	-3.18475	-3.18453	-3.18602	-3.18596	-3.18678	-3.18728	-3.18813	-3.18882	-3.1894	-3.19024	-3.19047	-3.19029	-3.19071	-3.19049	-3.19085	-3.19158	-3.19194	-3.19284	-3.19341	-3.19468	-3.19643	-3.19711	-3.19879	-3.20036	-3.2022	-3.20376	-3.20529	-3.20654	-3.20846	-3.20978
77	Anonymous participant OS 77			-3.03659	-3.03648	-3.03657	-3.0369	-3.03817	-3.04038	-3.04193	-3.04255	-3.04269	-3.04134	-3.03895	-3.03581	-3.03312	-3.03103	-3.02959	-3.02862	-3.0292	-3.02859	-3.02889	-3.02846	-3.02819	-3.02581	-3.01987	-3.01303	-3.00677	-3.00458	-3.00425	-3.00413	-3.00275	-3.00185	-3.00149	-2.99995	-2.99971	-2.99815	-2.99632	-2.99537	-2.99333	-2.9906	-2.98745	-2.98452	-2.98092	-2.97487	-2.96535	-2.95603	-2.94648	-2.94011
78	Anonymous participant OS 78			-3.19504	-3.19654	-3.19728	-3.19801	-3.19945	-3.20133	-3.20295	-3.20568	-3.20841	-3.21192	-3.21499	-3.21821	-3.22215	-3.22554	-3.2295	-3.23366	-3.24039	-3.2463	-3.25321	-3.26067	-3.26994	-3.27972	-3.28962	-3.29852	-3.30649	-3.31239	-3.31765	-3.32163	-3.32579	-3.32912	-3.33285	-3.33561	-3.33865	-3.34142	-3.34363	-3.3456	-3.34751	-3.34966	-3.35186	-3.35398	-3.35581	-3.35807	-3.35889	-3.36049	-3.36172	-3.36199
79	Anonymous participant OS 79			-3.33868	-3.33825	-3.33826	-3.33821	-3.33779	-3.33803	-3.3374	-3.33581	-3.33431	-3.33192	-3.32899	-3.3259	-3.32157	-3.31741	-3.31283	-3.30839	-3.30521	-3.30011	-3.29669	-3.29238	-3.28941	-3.28491	-3.28132	-3.27774	-3.27421	-3.27128	-3.26901	-3.26581	-3.26328	-3.26	-3.25703	-3.25392	-3.25075	-3.24815	-3.24527	-3.24375	-3.24049	-3.23781	-3.23644	-3.23323	-3.2309	-3.22985	-3.22703	-3.22438	-3.223	-3.21926
80	Anonymous participant OS 80			-3.24505	-3.24731	-3.24734	-3.24723	-3.24761	-3.24812	-3.24826	-3.24808	-3.24844	-3.24849	-3.24809	-3.24655	-3.24567	-3.2436	-3.24273	-3.2406	-3.23914	-3.23628	-3.23321	-3.23059	-3.22727	-3.22296	-3.2173	-3.21184	-3.20723	-3.20257	-3.19936	-3.19592	-3.19261	-3.18895	-3.18622	-3.18249	-3.17877	-3.17672	-3.17362	-3.17181	-3.16863	-3.16574	-3.16307	-3.15998	-3.15655	-3.15549	-3.15274	-3.15061	-3.14898	-3.14404
81	Anonymous participant OS 81			-2.71341	-2.71533	-2.72148	-2.72891	-2.73439	-2.73707	-2.73664	-2.7372	-2.73677	-2.73648	-2.73681	-2.73737	-2.7374	-2.73753	-2.73865	-2.74045	-2.7459	-2.75428	-2.76556	-2.77604	-2.78269	-2.78735	-2.79213	-2.79671	-2.80065	-2.80447	-2.80843	-2.81219	-2.81482	-2.81704	-2.81999	-2.82392	-2.82979	-2.83645	-2.84314	-2.84658	-2.84787	-2.84865	-2.84955	-2.85049	-2.85084	-2.85172	-2.85206	-2.85312	-2.85494	-2.85563
82	Anonymous participant OS 82			-2.71341	-2.71533	-2.72148	-2.72891	-2.73439	-2.73707	-2.73664	-2.7372	-2.73677	-2.73648	-2.73681	-2.73737	-2.7374	-2.73753	-2.73865	-2.74045	-2.7459	-2.75428	-2.76556	-2.77604	-2.78269	-2.78735	-2.79213	-2.79671	-2.80065	-2.80447	-2.80843	-2.81219	-2.81482	-2.81704	-2.81999	-2.82392	-2.82979	-2.83645	-2.84314	-2.84658	-2.84787	-2.84865	-2.84955	-2.85049	-2.85084	-2.85172	-2.85206	-2.85312	-2.85494	-2.85563
83	Anonymous participant OS 83			-3.31698	-3.32179	-3.32914	-3.33861	-3.35064	-3.36341	-3.3719	-3.3763	-3.37953	-3.38329	-3.38758	-3.39326	-3.39959	-3.4041	-3.40795	-3.41131	-3.41673	-3.42572	-3.43562	-3.44448	-3.45018	-3.45249	-3.45546	-3.45729	-3.46016	-3.45975	-3.45816	-3.45611	-3.45287	-3.44981	-3.44781	-3.44417	-3.44131	-3.43422	-3.42406	-3.41482	-3.40671	-3.40092	-3.39557	-3.39177	-3.38821	-3.38467	-3.38107	-3.37604	-3.36981	-3.36417
84	Anonymous participant OS 84			-3.37401	-3.37685	-3.37955	-3.38129	-3.38252	-3.38366	-3.3845	-3.38585	-3.38713	-3.38859	-3.38876	-3.38957	-3.39134	-3.39274	-3.39485	-3.39571	-3.39651	-3.39662	-3.39636	-3.39453	-3.39225	-3.39146	-3.39112	-3.38951	-3.38804	-3.38653	-3.38508	-3.38321	-3.38176	-3.37976	-3.37858	-3.37508	-3.3737	-3.37141	-3.3698	-3.3666	-3.36412	-3.36294	-3.36263	-3.36289	-3.3621	-3.36234	-3.36121	-3.36007	-3.35801	-3.35695
85	Anonymous participant OS 85			-3.21383	-3.2157	-3.21756	-3.22013	-3.2236	-3.22706	-3.23	-3.23268	-3.23554	-3.23788	-3.23969	-3.2405	-3.24075	-3.23909	-3.23789	-3.23657	-3.23548	-3.23412	-3.23374	-3.23369	-3.23434	-3.23497	-3.23543	-3.23606	-3.23708	-3.23689	-3.23665	-3.23666	-3.23651	-3.23648	-3.23668	-3.23615	-3.2364	-3.23712	-3.23747	-3.23778	-3.23776	-3.2378	-3.23788	-3.23721	-3.23655	-3.23527	-3.23387	-3.23209	-3.23002	-3.22717
86	Anonymous participant OS 86			-2.92044	-2.91905	-2.91734	-2.91646	-2.91576	-2.91552	-2.91554	-2.9155	-2.9159	-2.91616	-2.91625	-2.91625	-2.91712	-2.91736	-2.9178	-2.91828	-2.91965	-2.91967	-2.92113	-2.92164	-2.92295	-2.92376	-2.92509	-2.92582	-2.92714	-2.9279	-2.92877	-2.92981	-2.93096	-2.93181	-2.93333	-2.93461	-2.93572	-2.93687	-2.93833	-2.93967	-2.94163	-2.94271	-2.94409	-2.94539	-2.94716	-2.9486	-2.95005	-2.95191	-2.9538	-2.95552
87	Anonymous participant OS 87			-3.09324	-3.09733	-3.10256	-3.10794	-3.11358	-3.12032	-3.12707	-3.13361	-3.142	-3.15088	-3.15889	-3.16885	-3.17868	-3.18821	-3.19801	-3.2079	-3.21785	-3.2249	-3.23339	-3.23987	-3.24905	-3.25577	-3.26447	-3.27111	-3.27768	-3.28439	-3.29003	-3.29604	-3.30239	-3.30738	-3.31223	-3.31767	-3.32202	-3.32712	-3.32989	-3.33304	-3.33371	-3.33448	-3.3354	-3.33399	-3.33198	-3.33035	-3.32501	-3.32085	-3.31511	-3.31032
88	Anonymous participant OS 88			-2.97648	-2.97904	-2.98143	-2.98579	-2.99147	-2.99727	-3.00225	-3.00696	-3.0119	-3.01747	-3.02361	-3.03078	-3.03882	-3.04558	-3.05404	-3.0611	-3.0687	-3.07464	-3.08104	-3.08618	-3.09164	-3.09635	-3.09977	-3.10355	-3.10642	-3.10795	-3.1102	-3.11158	-3.11213	-3.11189	-3.11136	-3.10961	-3.10729	-3.10562	-3.10274	-3.10059	-3.09867	-3.09683	-3.09545	-3.09377	-3.09193	-3.091	-3.08851	-3.08713	-3.08697	-3.08643
[truncated: 315 more columns]

[truncated: 5 more sheets: OS_RL, OS_Rw, OS_dw, OS, Figures]
